# Supplementary material for: Modulation of Gene Expression in Liver of Hibernating Asiatic Toads (Bufo gargarizans)
Source: MDPI journal article supplement (doi:10.3390/ijms19082363), 2018-08-10
Supplement: s1 [file s1]

Table S3. Descriptive information about the means and standard deviations of body mass and fat-body mass of Asiatic toads (*Bufo gargarizans*).

|                   | Active females (n=10) | Active males (n=10) | Torpid females (n=10) | Torpid males (n=10) |
|-------------------|-----------------------|---------------------|-----------------------|---------------------|
| Body mass (g)     | 207.84±41.49          | 161.73±27.64        | 252.33±23.48          | 158.96±19.90        |
| Fat-body mass (g) | 0.0785±0.0343         | 0.1017±0.0637       | 0.0754±0.0219         | 0.0468±0.0310       |

Table S4. We used the two way ANOVA to test difference and found that significant difference in body mass between males and females and active and torpid. However, there was significant difference only in fat-body mass between active and torpid, but not difference between males and females. When controlling the body mass, there is significant difference only in fat-body mass between active and torpid, but not difference between males and females.

|                        | Females-vs-Males |        | Active-vs-Torpid |       | Interaction of sex and state |       |
|------------------------|------------------|--------|------------------|-------|------------------------------|-------|
|                        | F                | P      | F                | P     | F                            | P     |
| Body mass              | 56.665           | <0.001 | 5.069            | 0.031 | 6.504                        | 0.015 |
| Fat-body mass          | 0.045            | 0.834  | 5.051            | 0.031 | 4.002                        | 0.053 |
| Relative fat-body mass | 0.923            | 0.343  | 6.882            | 0.013 | 1.738                        | 0.196 |
