# Supplementary material for: Modulation of Gene Expression in Liver of Hibernating Asiatic Toads (Bufo gargarizans)
Source: MDPI journal article supplement (doi:10.3390/ijms19082363), 2018-08-10
Supplement: s1 [file s1]

Table S5. The primers designed for qRT-PCR.

| Gene                 | Primer     | Base sequence (5'- 3') | Products (bp) |
|----------------------|------------|------------------------|---------------|
| $\alpha$ -actin      | Sense      | GCTATGAACTGCCTGATGGT   | 133           |
|                      | Anti-sense | CTGATGCTGTTGTAGGTGGTC  |               |
| c106287.g<br>raph_c0 | Sense      | CGCTGAGGAACGATTTACG    | 139           |
|                      | Anti-sense | GCGGTTGATGCCTATGTGA    |               |
| c111514.g<br>raph_c0 | Sense      | CTACGACCCTCTTGTTACCC   | 197           |
|                      | Anti-sense | CTTTCGCATCCCCTGTATT    |               |
| c100636.g<br>raph_c0 | Sense      | ATCCAGCAATGACTACATAC   | 172           |
|                      | Anti-sense | ACCCATAAATCCGCACCAG    |               |
| c102204.g<br>raph_c0 | Sense      | AGGTGCTGTGCTTTATTTCG   | 178           |
|                      | Anti-sense | GATTTGCTCTGTTTGATTAT   |               |
| C85945.gr<br>aph_c0  | Sense      | GGTCGCACTTGGTCATCATC   | 137           |
|                      | Anti-sense | GTACCCGCGTATCCACTTTG   |               |
| c122853.g<br>raph_c0 | Sense      | CCCATAAGCGAAGCAAACG    | 90            |
|                      | Anti-sense | CGAGGAAGGCTGTAAGGTG    |               |
| c122834.g<br>raph_c0 | Sense      | GTGCTATGTCGCTCTTGACT   | 156           |
|                      | Anti-sense | CCAATAAATGATGGCTGGA    |               |
| c80857.gr<br>aph_c0  | Sense      | TGCGGAAGCAAATGTCGTA    | 146           |
|                      | Anti-sense | GACCTTCTCCATCATCCCGT   |               |
| c114573.g<br>raph_c0 | Sense      | TGGCTGCTGCGAGAAATAA    | 202           |
|                      | Anti-sense | TTGATGGCGTGGGTTTGTC    |               |
| c109992.g<br>raph_c1 | Sense      | GGTCCCGCTGAATGAAGAT    | 99            |
|                      | Anti-sense | GATTGACTCACCTCGTCCA    |               |
| c20664.gr<br>aph_c0  | Sense      | CCCAGTGAGATAGGGCAGA    | 187           |
|                      | Anti-sense | GGAACAACGAACCAGACA     |               |
| c76918.gr<br>aph_c0  | Sense      | GACAAGACCCCTTTTCTCG    | 110           |
|                      | Anti-sense | GTTGTCCCACCATAGCAAA    |               |

|                      |            |                            |     |
|----------------------|------------|----------------------------|-----|
| c111770.g<br>raph_c0 | Sense      | AAAGCAATCCACTCCCTCA<br>T   | 183 |
|                      | Anti-sense | AATCGGTCTCATAGTGGGTT<br>G  |     |
| c122942.g<br>raph_c0 | Sense      | TTTCTCCCATAACAGGACTT<br>GC | 151 |
|                      | Anti-sense | AGACGGTTTACCACGCAGA<br>G   |     |
| c102232.g<br>raph_c1 | Sense      | CCCCAGGCAGATTTCCATA        | 180 |
|                      | Anti-sense | AAGGTATCCTCTATCCCACA<br>GC |     |
| c77297.gr<br>aph_c0  | Sense      | CGCAGTTTCTAAAGCAAGC<br>C   | 162 |
|                      | Anti-sense | GGAGCGGAGCATACCCATA        |     |
| c123340.g<br>raph_c0 | Sense      | GCAAATCAGACGACAAATC<br>ATC | 164 |
|                      | Anti-sense | CACTGGTGGTGAGTTGGAA<br>AT  |     |
| c101480.g<br>raph_c0 | Sense      | GATGCCAACCGCCATAGAA        | 229 |
|                      | Anti-sense | CCAAGCTGTAAAGCCACGA<br>TA  |     |

---

Primer pairs of  $\alpha$ -actin was obtained in Wang et al. 2015.
