# Supplementary material for: Modulation of Gene Expression in Liver of Hibernating Asiatic Toads (Bufo gargarizans)
Source: Int J Mol Sci. 2018 Aug 10;19(8):2363. doi: 10.3390/ijms19082363 (PMC6121651; doi:10.3390/ijms19082363)
Supplement: Supplementary file 1 [file ijms-19-02363-s001.zip › ╓╨╗¬≤╕≥▄╫¬┬╝╫Θ╬─╒┬╨▐╕─░μ/Table S1.xls]

## Sheet: AF-vs-AM DEG
#ID	AF_count	AF_FPKM	AM_count	AM_FPKM	FDR	log2FC	regulated
c100038.graph_c0	20	2.22554	0	0	1.57746e-05	-4.8172	down
c100092.graph_c0	19	2.40427	133	13.6142	2.95478e-09	2.28747	up
c100152.graph_c0	33	5.38046	0	0	5.87282e-10	-5.51937	down
c100196.graph_c0	18	2.3488	0	0	7.90178e-05	-4.67087	down
c100204.graph_c0	18	3.72956	0	0	7.90178e-05	-4.67087	down
c100330.graph_c0	20	2.36392	0	0	1.57746e-05	-4.8172	down
c100337.graph_c0	31	3.40132	0	0	2.73647e-09	-5.4312	down
c100406.graph_c0	24	2.06883	0	0	6.50757e-07	-5.07168	down
c100455.graph_c0	22	2.06371	0	0	3.18572e-06	-4.95005	down
c100463.graph_c0	50	2.14139	0	0	1.77636e-15	-6.10809	down
c100469.graph_c0	19	2.28009	0	0	3.52543e-05	-4.74589	down
c100488.graph_c0	42	2.68922	0	0	6.56142e-13	-5.86053	down
c100489.graph_c0	34	2.04546	0	0	2.73146e-10	-5.56151	down
c100609.graph_c0	26	3.47957	0	0	1.34437e-07	-5.18386	down
c100624.graph_c0	41	3.31129	0	0	1.38223e-12	-5.82637	down
c100636.graph_c0	0	0	155	9.78628	0	7.25264	up
c100640.graph_c0	11	0.962753	79	5.59321	7.94232e-06	2.29339	up
c100656.graph_c0	16	2.31935	0	0	0.000400403	-4.50801	down
c100674.graph_c0	23	2.41379	0	0	1.4378e-06	-5.01215	down
c100683.graph_c0	30	1.59253	1	0.0429415	1.14707e-07	-4.4014	down
c100685.graph_c0	3	0.479169	60	7.75231	1.06739e-07	3.55383	up
c100711.graph_c0	16	3.89378	0	0	0.000400403	-4.50801	down
c100781.graph_c0	59	3.34421	0	0	0	-6.34369	down
c100791.graph_c0	27	2.83833	0	0	6.13591e-08	-5.23683	down
c100796.graph_c0	40	5.50588	0	0	2.91911e-12	-5.79139	down
c100830.graph_c0	27	2.57902	0	0	6.13591e-08	-5.23683	down
c100839.graph_c0	28	2.61481	0	0	2.80825e-08	-5.28793	down
c101176.graph_c0	140	7.94979	0	0	0	-7.58001	down
c101183.graph_c0	28	2.49591	0	0	2.80825e-08	-5.28793	down
c101202.graph_c0	36	7.55899	0	0	5.95515e-11	-5.64227	down
c101210.graph_c0	481	29.8239	0	0	0	-9.35527	down
c101230.graph_c0	78	8.7105	0	0	0	-6.74211	down
c101299.graph_c0	23	4.05571	0	0	1.4378e-06	-5.01215	down
c101330.graph_c0	27	6.09787	0	0	6.13591e-08	-5.23683	down
c101488.graph_c0	17	2.08801	0	0	0.000177621	-4.59174	down
c101602.graph_c0	36	2.79243	0	0	5.95515e-11	-5.64227	down
c101623.graph_c0	24	1.87554	0	0	6.50757e-07	-5.07168	down
c101667.graph_c0	53	12.3249	0	0	2.22045e-16	-6.19097	down
c101684.graph_c0	27	2.39656	0	0	6.13591e-08	-5.23683	down
c101878.graph_c0	68	14.6962	0	0	0	-6.54615	down
c101880.graph_c0	67	13.7012	22	3.63932	2.93897e-06	-2.03297	down
c101898.graph_c0	28	2.4575	0	0	2.80825e-08	-5.28793	down
c101911.graph_c0	62	9.24382	7	0.844248	4.9486e-12	-3.44319	down
c102044.graph_c0	20	2.17915	0	0	1.57746e-05	-4.8172	down
c102151.graph_c0	32	2.29751	0	0	1.26602e-09	-5.47596	down
c102204.graph_c0	0	0	23	2.91968	0.00177486	4.55338	up
c102216.graph_c0	18	2.21953	0	0	7.90178e-05	-4.67087	down
c102232.graph_c1	0	0	115	11.4037	0	6.8253	up
c102351.graph_c0	16	2.47369	0	0	0.000400403	-4.50801	down
c102460.graph_c0	25	2.14912	0	0	2.95367e-07	-5.12886	down
c102601.graph_c0	41	5.20391	0	0	1.38223e-12	-5.82637	down
c102638.graph_c0	114	7.2402	1	0.0513757	0	-6.30173	down
c102702.graph_c0	96	10.9248	0	0	0	-7.03914	down
c102741.graph_c0	1	0.0952291	89	6.85602	5.21805e-15	5.22072	up
c102808.graph_c0	23	4.03304	0	0	1.4378e-06	-5.01215	down
c102816.graph_c0	35	3.23005	0	0	1.27374e-10	-5.60246	down
c102836.graph_c0	20	4.98322	0	0	1.57746e-05	-4.8172	down
c102871.graph_c0	40	2.82978	0	0	2.91911e-12	-5.79139	down
c102914.graph_c0	16	1.54003	0	0	0.000400403	-4.50801	down
c102931.graph_c0	35	2.90142	0	0	1.27374e-10	-5.60246	down
c103015.graph_c0	42	6.04652	0	0	6.56142e-13	-5.86053	down
c103073.graph_c0	24	2.61045	2	0.175973	7.86623e-05	-3.50862	down
c103173.graph_c0	28	1.98532	0	0	2.80825e-08	-5.28793	down
c103270.graph_c0	22	1.56876	0	0	3.18572e-06	-4.95005	down
c103378.graph_c0	45	2.76017	0	0	7.11653e-14	-5.95841	down
c103425.graph_c0	68	4.95306	0	0	0	-6.54615	down
c103430.graph_c0	29	6.92319	0	0	1.28878e-08	-5.33729	down
c103474.graph_c0	25	2.23804	0	0	2.95367e-07	-5.12886	down
c103486.graph_c0	16	2.32472	0	0	0.000400403	-4.50801	down
c103508.graph_c0	21	2.39633	0	0	7.07878e-06	-4.88515	down
c103548.graph_c0	193	18.3514	0	0	0	-8.04111	down
c103550.graph_c0	25	2.4063	0	0	2.95367e-07	-5.12886	down
c103552.graph_c0	38	4.85754	0	0	1.31181e-11	-5.71876	down
c103626.graph_c0	20	1.28583	0	0	1.57746e-05	-4.8172	down
c103636.graph_c0	22	3.41817	0	0	3.18572e-06	-4.95005	down
c103673.graph_c0	24	4.16738	0	0	6.50757e-07	-5.07168	down
c103696.graph_c0	23	2.09487	0	0	1.4378e-06	-5.01215	down
c103743.graph_c0	70	10.2418	0	0	0	-6.58753	down
c103769.graph_c0	34	2.00886	0	0	2.73146e-10	-5.56151	down
c103900.graph_c0	22	1.15708	0	0	3.18572e-06	-4.95005	down
c104103.graph_c0	55	5.49625	0	0	0	-6.2437	down
c104159.graph_c0	20	3.11515	0	0	1.57746e-05	-4.8172	down
c104172.graph_c0	4786	86.6787	474	6.94433	0	-3.80912	down
c104208.graph_c0	25	1.97584	0	0	2.95367e-07	-5.12886	down
c104245.graph_c0	150	15.9828	0	0	0	-7.67905	down
c104246.graph_c0	38	3.14181	0	0	1.31181e-11	-5.71876	down
c104305.graph_c0	23	2.47592	0	0	1.4378e-06	-5.01215	down
c104314.graph_c0	27	2.30213	0	0	6.13591e-08	-5.23683	down
c104368.graph_c0	21	2.20021	0	0	7.07878e-06	-4.88515	down
c104433.graph_c0	62	7.12672	0	0	0	-6.41438	down
c104437.graph_c1	48	1.80227	13	0.394851	1.94635e-05	-2.27331	down
c104459.graph_c0	42	4.08014	0	0	6.56142e-13	-5.86053	down
c104461.graph_c0	50	2.40768	0	0	1.77636e-15	-6.10809	down
c104508.graph_c0	53	2.42731	0	0	2.22045e-16	-6.19097	down
c104523.graph_c0	100	23.2545	25	4.70282	1.1189e-11	-2.42885	down
c104543.graph_c0	41	2.11733	0	0	1.38223e-12	-5.82637	down
c104553.graph_c0	98	21.9748	0	0	0	-7.06867	down
c104602.graph_c0	43	4.17083	0	0	3.12195e-13	-5.8939	down
c104620.graph_c0	33	2.544	3	0.187084	8.47888e-07	-3.54402	down
c104624.graph_c0	17	3.03179	0	0	0.000177621	-4.59174	down
c104739.graph_c0	27	2.55182	0	0	6.13591e-08	-5.23683	down
c104772.graph_c1	86	14.71	0	0	0	-6.88172	down
c104893.graph_c0	27	3.32726	4	0.398745	0.000230136	-2.94122	down
c104930.graph_c0	50	5.53439	0	0	1.77636e-15	-6.10809	down
c104963.graph_c0	76	8.55569	10	0.910655	1.21569e-13	-3.2755	down
c104973.graph_c0	34	2.32406	0	0	2.73146e-10	-5.56151	down
c104982.graph_c0	30	2.43229	0	0	5.93062e-09	-5.38501	down
c105133.graph_c0	38	2.03268	0	0	1.31181e-11	-5.71876	down
c105144.graph_c0	17	1.68542	0	0	0.000177621	-4.59174	down
c105191.graph_c0	25	1.77663	0	0	2.95367e-07	-5.12886	down
c105247.graph_c0	24	4.17339	0	0	6.50757e-07	-5.07168	down
c105293.graph_c0	31	3.37768	0	0	2.73647e-09	-5.4312	down
c105378.graph_c0	27	1.66424	0	0	6.13591e-08	-5.23683	down
c105392.graph_c0	41	3.33707	0	0	1.38223e-12	-5.82637	down
c105555.graph_c0	31	3.14295	0	0	2.73647e-09	-5.4312	down
c105636.graph_c0	55	6.44816	0	0	0	-6.2437	down
c105676.graph_c0	29	3.42439	0	0	1.28878e-08	-5.33729	down
c105717.graph_c0	22	2.03631	0	0	3.18572e-06	-4.95005	down
c105726.graph_c0	52	2.42398	6	0.22625	4.83114e-10	-3.38473	down
c105746.graph_c0	32	3.29763	0	0	1.26602e-09	-5.47596	down
c105774.graph_c0	23	2.15108	0	0	1.4378e-06	-5.01215	down
c105779.graph_c0	21	1.58961	1	0.0612326	9.90347e-05	-3.90154	down
c105787.graph_c0	34	2.43831	0	0	2.73146e-10	-5.56151	down
c105817.graph_c0	28	2.51018	0	0	2.80825e-08	-5.28793	down
c105898.graph_c0	27	8.74055	1	0.261871	1.07887e-06	-4.25322	down
c105930.graph_c0	43	2.98479	0	0	3.12195e-13	-5.8939	down
c105955.graph_c0	25	1.7528	0	0	2.95367e-07	-5.12886	down
c105967.graph_c0	39	4.07251	0	0	6.18039e-12	-5.75553	down
c105997.graph_c0	36	5.73543	0	0	5.95515e-11	-5.64227	down
c106072.graph_c0	39	4.34512	12	1.08151	0.000860502	-2.0855	down
c106086.graph_c0	17	2.54366	0	0	0.000177621	-4.59174	down
c106125.graph_c0	24	1.7451	0	0	6.50757e-07	-5.07168	down
c106141.graph_c0	258	27.351	0	0	0	-8.4585	down
c106175.graph_c0	35	2.80505	0	0	1.27374e-10	-5.60246	down
c106283.graph_c0	33	4.0139	0	0	5.87282e-10	-5.51937	down
c106287.graph_c0	1112	30.5586	17	0.377912	0	-6.42426	down
c106378.graph_c0	26	2.71501	0	0	1.34437e-07	-5.18386	down
c106404.graph_c0	23	3.1762	0	0	1.4378e-06	-5.01215	down
c106520.graph_c0	61	10.1238	20	2.68508	1.02264e-05	-2.03027	down
c106557.graph_c0	20	1.48173	0	0	1.57746e-05	-4.8172	down
c106570.graph_c0	84	6.37381	0	0	0	-6.84807	down
c106604.graph_c0	93	7.97289	0	0	0	-6.99369	down
c106620.graph_c0	73	4.43137	0	0	0	-6.64746	down
c106664.graph_c0	21	2.15698	0	0	7.07878e-06	-4.88515	down
c106675.graph_c0	273	33.6959	0	0	0	-8.53981	down
c106728.graph_c0	46	5.2206	0	0	3.40838e-14	-5.98962	down
c106849.graph_c0	46	4.12093	0	0	3.40838e-14	-5.98962	down
c106943.graph_c0	137	5.56715	26	0.854669	0	-2.82578	down
c107040.graph_c0	60	3.15833	0	0	0	-6.36764	down
c107118.graph_c0	27	3.89599	0	0	6.13591e-08	-5.23683	down
c107166.graph_c0	281	23.8619	0	0	0	-8.58137	down
c107301.graph_c0	85	10.4811	0	0	0	-6.86499	down
c107304.graph_c0	30	2.90091	0	0	5.93062e-09	-5.38501	down
c107315.graph_c0	33	2.25571	8	0.442355	0.000605086	-2.37871	down
c107364.graph_c0	53	3.77929	0	0	2.22045e-16	-6.19097	down
c107412.graph_c0	44	2.19982	7	0.283102	2.83924e-07	-2.95533	down
c107426.graph_c0	114	11.4104	0	0	0	-7.28534	down
c107488.graph_c0	34	3.28264	0	0	2.73146e-10	-5.56151	down
c107492.graph_c0	20	1.8033	0	0	1.57746e-05	-4.8172	down
c107499.graph_c0	32	2.97949	0	0	1.26602e-09	-5.47596	down
c107568.graph_c0	72	1.75627	4	0.0789279	0	-4.33215	down
c107611.graph_c0	2	0.0703237	139	3.95366	0	5.20157	up
c107620.graph_c0	601	68.9569	0	0	0	-9.67616	down
c107654.graph_c0	39	3.33436	0	0	6.18039e-12	-5.75553	down
c107718.graph_c0	43	3.23928	0	0	3.12195e-13	-5.8939	down
c107734.graph_c0	85	4.32198	0	0	0	-6.86499	down
c107753.graph_c0	89	15.391	0	0	0	-6.93078	down
c107799.graph_c0	26	3.19343	0	0	1.34437e-07	-5.18386	down
c107837.graph_c0	50	2.0817	0	0	1.77636e-15	-6.10809	down
c107905.graph_c0	30	0.792151	8	0.170879	0.0032857	-2.24435	down
c107970.graph_c0	65	2.84996	9	0.319213	1.62326e-11	-3.18948	down
c107985.graph_c0	49	2.71365	0	0	3.77476e-15	-6.07937	down
c108080.graph_c0	130	13.3309	0	0	0	-7.47368	down
c108086.graph_c0	64	5.42738	0	0	0	-6.45966	down
c108159.graph_c0	46	3.67724	0	0	3.40838e-14	-5.98962	down
c108253.graph_c0	46	4.7796	0	0	3.40838e-14	-5.98962	down
c108270.graph_c0	42	3.00516	0	0	6.56142e-13	-5.86053	down
c108583.graph_c0	36	2.69255	0	0	5.95515e-11	-5.64227	down
c108609.graph_c0	44	3.29876	0	0	1.48992e-13	-5.92652	down
c108688.graph_c0	531569	9086.77	6645	91.8876	0	-6.79777	down
c108744.graph_c0	29	3.13257	0	0	1.28878e-08	-5.33729	down
c108799.graph_c0	42	5.05955	0	0	6.56142e-13	-5.86053	down
c108843.graph_c0	214	20.5664	0	0	0	-8.18959	down
c108877.graph_c0	142	11.0282	0	0	0	-7.60037	down
c108896.graph_c0	143	20.0352	0	0	0	-7.61044	down
c108903.graph_c0	21	3.13843	0	0	7.07878e-06	-4.88515	down
c108980.graph_c0	30	2.95095	0	0	5.93062e-09	-5.38501	down
c109041.graph_c0	72	4.36084	0	0	0	-6.62776	down
c109136.graph_c0	87	7.85563	0	0	0	-6.89826	down
c109178.graph_c0	25	3.20882	0	0	2.95367e-07	-5.12886	down
c109179.graph_c0	19	1.90477	0	0	3.52543e-05	-4.74589	down
c109191.graph_c0	12185	168.33	370	4.13477	0	-5.51368	down
c109214.graph_c0	23	2.03575	0	0	1.4378e-06	-5.01215	down
c109226.graph_c0	16	3.81969	0	0	0.000400403	-4.50801	down
c109243.graph_c0	39	3.6045	0	0	6.18039e-12	-5.75553	down
c109275.graph_c0	32	2.53867	249	15.9796	2.22045e-16	2.45699	up
c109329.graph_c0	194	22.9733	0	0	0	-8.04854	down
c109358.graph_c0	41	2.38427	0	0	1.38223e-12	-5.82637	down
c109550.graph_c1	18	2.24602	1	0.100937	0.000959834	-3.68727	down
c109617.graph_c0	76	6.27535	0	0	0	-6.70499	down
c109642.graph_c0	43	12.3861	0	0	3.12195e-13	-5.8939	down
c109683.graph_c0	49	7.41129	0	0	3.77476e-15	-6.07937	down
c109713.graph_c0	141	15.0325	0	0	0	-7.59023	down
c109721.graph_c0	61	8.57829	5	0.568792	3.05755e-13	-3.83366	down
c109752.graph_c0	22	2.27531	2	0.167324	0.000329718	-3.38698	down
c109776.graph_c0	120	10.4349	0	0	0	-7.35888	down
c109780.graph_c0	30	2.02854	9	0.492285	0.00791379	-2.09272	down
c109796.graph_c0	38	2.27519	0	0	1.31181e-11	-5.71876	down
c109834.graph_c0	38	2.51792	0	0	1.31181e-11	-5.71876	down
c109852.graph_c0	40	4.814	0	0	2.91911e-12	-5.79139	down
c109858.graph_c0	48	5.17602	2	0.17446	3.2464e-12	-4.48701	down
c109912.graph_c0	42	3.73591	0	0	6.56142e-13	-5.86053	down
c109949.graph_c0	60	4.78359	16	1.03189	6.30639e-07	-2.31119	down
c109986.graph_c0	55	2.06633	15	0.45587	3.20445e-06	-2.27458	down
c110011.graph_c0	44	2.36169	1	0.0434192	4.05709e-12	-4.94291	down
c110015.graph_c0	309	35.389	0	0	0	-8.71806	down
c110129.graph_c0	26	2.61071	0	0	1.34437e-07	-5.18386	down
c110150.graph_c0	16	1.71064	0	0	0.000400403	-4.50801	down
c110200.graph_c0	50	2.21238	0	0	1.77636e-15	-6.10809	down
c110203.graph_c0	78	7.83212	0	0	0	-6.74211	down
c110258.graph_c0	108	4.36327	0	0	0	-7.20785	down
c110295.graph_c0	122	3.73194	0	0	0	-7.38258	down
c110326.graph_c0	66	7.11703	0	0	0	-6.50355	down
c110336.graph_c0	642	18.6302	9308	218.5	0	3.38019	up
c110384.graph_c0	75	6.58259	0	0	0	-6.68607	down
c110389.graph_c0	1292	98.6307	0	0	0	-10.7794	down
c110421.graph_c0	24	2.10643	0	0	6.50757e-07	-5.07168	down
c110474.graph_c0	416	50.1618	0	0	0	-9.14616	down
c110476.graph_c0	10	1.67843	68	9.23259	9.68357e-05	2.20855	up
c110542.graph_c0	43	4.5052	0	0	3.12195e-13	-5.8939	down
c110586.graph_c0	61	3.19889	0	0	0	-6.3912	down
c110608.graph_c0	38	2.32399	0	0	1.31181e-11	-5.71876	down
c110731.graph_c0	42	6.90167	2	0.265856	2.13608e-10	-4.29747	down
c110884.graph_c0	61	5.99087	0	0	0	-6.3912	down
c110906.graph_c0	47	2.64967	0	0	1.64313e-14	-6.02016	down
c110911.graph_c0	46	3.4201	0	0	3.40838e-14	-5.98962	down
c110916.graph_c0	70	7.56136	0	0	0	-6.58753	down
c110925.graph_c0	63	2.78368	10	0.357429	1.97429e-10	-3.00771	down
c110939.graph_c0	85	4.48182	0	0	0	-6.86499	down
c110948.graph_c0	33	2.9004	0	0	5.87282e-10	-5.51937	down
c111012.graph_c0	17	1.34526	0	0	0.000177621	-4.59174	down
c111057.graph_c0	22	1.58316	0	0	3.18572e-06	-4.95005	down
c111143.graph_c0	101	12.2969	0	0	0	-7.11185	down
c111186.graph_c0	269	29.5146	0	0	0	-8.51857	down
c111189.graph_c0	41	2.93361	0	0	1.38223e-12	-5.82637	down
c111190.graph_c0	82	6.16243	0	0	0	-6.81361	down
c111218.graph_c0	263	27.2142	0	0	0	-8.48612	down
c111276.graph_c0	76	2.47444	22	0.579426	4.87036e-08	-2.21295	down
c111369.graph_c0	29	2.33912	0	0	1.28878e-08	-5.33729	down
c111407.graph_c0	48	3.19402	0	0	7.88258e-15	-6.05007	down
c111412.graph_c0	43	3.96252	0	0	3.12195e-13	-5.8939	down
c111452.graph_c0	55	4.50273	0	0	0	-6.2437	down
c111514.graph_c0	116	8.31894	5	0.290063	0	-4.75273	down
c111670.graph_c0	22	2.87674	0	0	3.18572e-06	-4.95005	down
c111709.graph_c0	31	2.8821	0	0	2.73647e-09	-5.4312	down
c111720.graph_c0	174	11.8165	1	0.0549352	0	-6.90859	down
c111749.graph_c0	102	11.1137	0	0	0	-7.12596	down
c111783.graph_c0	63	3.70311	0	0	0	-6.4372	down
c111830.graph_c0	0	0	73	3.38695	1.32894e-13	6.17693	up
c111895.graph_c0	117	11.9393	0	0	0	-7.32258	down
c111927.graph_c0	107	6.95403	0	0	0	-7.19452	down
c111986.graph_c0	96	6.78	0	0	0	-7.03914	down
c112018.graph_c0	79	12.1988	0	0	0	-6.76032	down
c112026.graph_c0	136	14.8182	0	0	0	-7.53841	down
c112046.graph_c0	88	4.40841	0	0	0	-6.91461	down
c112139.graph_c0	25	2.40261	0	0	2.95367e-07	-5.12886	down
c112159.graph_c0	33	3.13068	0	0	5.87282e-10	-5.51937	down
c112209.graph_c0	72	12.349	19	2.63612	2.507e-08	-2.33714	down
c112217.graph_c0	28	3.36974	0	0	2.80825e-08	-5.28793	down
c112279.graph_c0	63	2.71857	0	0	0	-6.4372	down
c112379.graph_c0	213	18.3357	0	0	0	-8.18285	down
c112395.graph_c0	25	3.09179	0	0	2.95367e-07	-5.12886	down
c112410.graph_c0	63	3.60679	0	0	0	-6.4372	down
c112454.graph_c1	63	4.28766	0	0	0	-6.4372	down
c112497.graph_c0	51	4.24738	0	0	8.88178e-16	-6.13625	down
c112498.graph_c0	2499	86.5528	811	22.7221	0	-2.09833	down
c112500.graph_c0	38	2.86606	0	0	1.31181e-11	-5.71876	down
c112526.graph_c0	47	4.29641	0	0	1.64313e-14	-6.02016	down
c112649.graph_c0	51	3.71264	0	0	8.88178e-16	-6.13625	down
c112656.graph_c0	220	20.5756	0	0	0	-8.22935	down
c112746.graph_c0	41	2.07966	0	0	1.38223e-12	-5.82637	down
c112760.graph_c0	81	6.72361	0	0	0	-6.79606	down
c112955.graph_c0	315	16.3955	0	0	0	-8.74574	down
c112965.graph_c0	113	5.60929	0	0	0	-7.27271	down
c112966.graph_c0	35	2.77885	8	0.513805	0.000192454	-2.4618	down
c112971.graph_c0	19	0.779173	186	6.17029	1.44329e-15	2.76821	up
c113039.graph_c0	199	15.251	0	0	0	-8.08512	down
c113065.graph_c0	89	5.59018	19	0.965387	6.39033e-12	-2.64016	down
c113071.graph_c0	49	2.74638	9	0.408055	1.78288e-07	-2.78709	down
c113113.graph_c0	332	20.6261	0	0	0	-8.8214	down
c113138.graph_c0	108	12.2793	0	0	0	-7.20785	down
c113168.graph_c0	74	4.76735	0	0	0	-6.66689	down
c113169.graph_c0	61	4.54073	0	0	0	-6.3912	down
c113218.graph_c0	780	49.025	0	0	0	-10.0519	down
c113293.graph_c0	118	7.10569	0	0	0	-7.33478	down
c113304.graph_c0	56	2.65985	3	0.115267	1.41109e-13	-4.29401	down
c113319.graph_c0	125	9.2164	33	1.96824	2.21712e-13	-2.36195	down
c113383.graph_c0	74	3.72343	0	0	0	-6.66689	down
c113411.graph_c0	67	5.10239	0	0	0	-6.52501	down
c113526.graph_c0	52	1.91464	6	0.178709	4.83114e-10	-3.38473	down
c113647.graph_c0	45	3.21981	0	0	7.11653e-14	-5.95841	down
c113685.graph_c0	134	9.83467	0	0	0	-7.51716	down
c113688.graph_c0	178	19.7838	0	0	0	-7.92485	down
c113745.graph_c0	20	3.80466	1	0.153886	0.000211073	-3.83359	down
c113809.graph_c1	2633	167.579	904	46.5426	0	-2.01723	down
c113898.graph_c6	52	7.36781	15	1.71925	1.44923e-05	-2.19476	down
c113945.graph_c0	41	3.91033	0	0	1.38223e-12	-5.82637	down
c114038.graph_c0	56	9.17387	5	0.662593	7.29483e-12	-3.71181	down
c114138.graph_c0	73	7.5062	1	0.0831781	0	-5.66385	down
c114289.graph_c0	320	28.0461	0	0	0	-8.76841	down
c114360.graph_c0	712	31.0877	0	0	0	-9.92039	down
c114369.graph_c0	86	3.67316	0	0	0	-6.88172	down
c114431.graph_c0	382	21.6426	0	0	0	-9.02337	down
c114443.graph_c0	39	2.24096	0	0	6.18039e-12	-5.75553	down
c114460.graph_c0	43	3.97127	0	0	3.12195e-13	-5.8939	down
c114468.graph_c0	746	49.8519	0	0	0	-9.98762	down
c114469.graph_c0	42	2.64601	0	0	6.56142e-13	-5.86053	down
c114492.graph_c0	2039	78.5812	0	0	0	-11.4373	down
c114573.graph_c0	28	1.53709	0	0	2.80825e-08	-5.28793	down
c114616.graph_c0	64	2.15071	0	0	0	-6.45966	down
c114632.graph_c0	100	5.95891	0	0	0	-7.0976	down
c114749.graph_c0	56	3.45514	0	0	0	-6.26935	down
c114859.graph_c0	112	10.7802	0	0	0	-7.25997	down
c114931.graph_c0	201	15.9359	0	0	0	-8.09949	down
c114998.graph_c0	213	23.1144	0	0	0	-8.18285	down
c115139.graph_c0	89	3.41738	0	0	0	-6.93078	down
c115148.graph_c0	195	11.554	0	0	0	-8.05593	down
c115245.graph_c0	278	18.7171	0	0	0	-8.56592	down
c115329.graph_c1	84	3.66765	23	0.81236	2.83324e-09	-2.29469	down
c115412.graph_c0	2695	132.521	30	1.19332	0	-6.91733	down
c115462.graph_c2	1177	489.62	0	0	0	-10.645	down
c115590.graph_c0	72	8.17434	5	0.4592	3.33067e-16	-4.07022	down
c115604.graph_c0	173	8.7504	0	0	0	-7.88392	down
c115615.graph_c0	87	6.66596	0	0	0	-6.89826	down
c115634.graph_c0	60	11.26	0	0	0	-6.36764	down
c115651.graph_c0	186	8.87821	0	0	0	-7.98802	down
c115843.graph_c6	44	5.7059	7	0.734314	2.83924e-07	-2.95533	down
c116005.graph_c0	94	6.97649	0	0	0	-7.009	down
c116103.graph_c0	252	18.6478	0	0	0	-8.42465	down
c116110.graph_c0	89	7.62997	0	0	0	-6.93078	down
c116366.graph_c0	88	8.2268	24	1.81498	1.0647e-09	-2.30239	down
c116438.graph_c0	17	1.4109	412	27.6603	0	4.06537	up
c116531.graph_c0	110	6.43559	1	0.0473269	0	-6.25054	down
c116609.graph_c0	125	19.8517	0	0	0	-7.41742	down
c116728.graph_c0	114	6.03119	0	0	0	-7.28534	down
c116741.graph_c0	109	3.53602	0	0	0	-7.22106	down
c116783.graph_c0	55	4.26622	0	0	0	-6.2437	down
c116973.graph_c0	618	37.5029	0	0	0	-9.71635	down
c117125.graph_c0	244	11.8648	0	0	0	-8.37825	down
c117128.graph_c0	107	2.99022	22	0.497341	2.52021e-14	-2.70248	down
c117235.graph_c0	134	9.76044	0	0	0	-7.51716	down
c117363.graph_c0	93	3.91786	11	0.374861	0	-3.43893	down
c117447.graph_c0	89	8.86865	3	0.241825	0	-4.95544	down
c117457.graph_c0	390	34.9752	67	4.86052	0	-2.99824	down
c117508.graph_c0	80	3.31751	0	0	0	-6.7783	down
c117703.graph_c0	133	20.1261	0	0	0	-7.50641	down
c117841.graph_c0	201	10.0652	0	0	0	-8.09949	down
c117880.graph_c0	138	5.60655	0	0	0	-7.55936	down
c118101.graph_c0	105	13.2068	0	0	0	-7.16749	down
c118137.graph_c0	39	2.77421	9	0.51788	5.51926e-05	-2.46324	down
c118184.graph_c0	22	1.25716	3	0.138676	0.00158793	-2.9747	down
c118232.graph_c0	43	3.49985	11	0.724246	4.34813e-05	-2.33914	down
c118291.graph_c0	117	6.26648	0	0	0	-7.32258	down
c118426.graph_c0	130	7.89263	0	0	0	-7.47368	down
c118476.graph_c0	217	9.50122	0	0	0	-8.2096	down
c118528.graph_c1	220	3.69318	35	0.47529	0	-3.09147	down
c118687.graph_c0	264	10.7909	0	0	0	-8.49158	down
c118810.graph_c0	88	3.24587	0	0	0	-6.91461	down
c118855.graph_c0	211	10.5407	0	0	0	-8.16929	down
c118878.graph_c3	55	5.98352	12	1.05606	1.77232e-07	-2.57366	down
c118904.graph_c0	251	12.4169	0	0	0	-8.41894	down
c118905.graph_c0	277	10.4632	0	0	0	-8.56074	down
c119031.graph_c0	145	6.63106	0	0	0	-7.63038	down
c119071.graph_c0	240	10.4102	0	0	0	-8.35448	down
c119259.graph_c1	0	0	73	1.42822	1.32894e-13	6.17693	up
c119432.graph_c0	223	8.89759	0	0	0	-8.24882	down
c119575.graph_c0	54	3.67116	321	17.6533	4.77396e-15	2.08047	up
c119575.graph_c1	59	2.34957	407	13.1112	0	2.29585	up
c119635.graph_c0	219	9.76601	0	0	0	-8.22279	down
c119670.graph_c0	91	5.2675	0	0	0	-6.96258	down
c119772.graph_c0	457	17.8871	0	0	0	-9.28154	down
c119788.graph_c0	47	4.06346	14	0.979126	7.70095e-05	-2.14402	down
c119817.graph_c0	1143	81.3582	1	0.0575794	0	-9.6191	down
c120046.graph_c0	184	4.02217	0	0	0	-7.97249	down
c120071.graph_c0	32	3.69564	7	0.653959	0.000384382	-2.50476	down
c120111.graph_c0	237	36.783	1	0.125548	0	-7.35278	down
c120129.graph_c0	354	10.9813	0	0	0	-8.91377	down
c120158.graph_c0	484	24.3066	78	3.16874	0	-3.09299	down
c120183.graph_c0	185	8.38695	0	0	0	-7.98028	down
c120235.graph_c0	361	21.0242	0	0	0	-8.94196	down
c120253.graph_c5	26	2.64886	0	0	1.34437e-07	-5.18386	down
c120253.graph_c8	5	0.529163	58	4.96546	6.96462e-06	2.88714	up
c120255.graph_c0	768	40.157	0	0	0	-10.0295	down
c120261.graph_c0	8	0.415604	59	2.47944	0.000227741	2.30441	up
c120357.graph_c0	673	14.0728	182	3.07857	0	-2.3563	down
c120415.graph_c1	88	7.21765	6	0.398086	0	-4.13547	down
c120540.graph_c1	82	4.01957	17	0.674103	2.57515e-11	-2.6748	down
c120708.graph_c0	26	1.4088	149	6.53093	2.28109e-08	2.01221	up
c120763.graph_c1	150	11.2057	40	2.41725	2.9976e-15	-2.35365	down
c121124.graph_c0	188	6.39882	0	0	0	-8.00339	down
c121181.graph_c0	257	6.79754	0	0	0	-8.45292	down
c121279.graph_c0	268	7.69522	0	0	0	-8.51321	down
c121283.graph_c0	20	1.82989	767	56.7677	0	4.73483	up
c121566.graph_c4	102	10.1768	26	2.09845	1.10462e-11	-2.40281	down
c121594.graph_c0	4458	358.34	0	0	0	-12.5656	down
c122235.graph_c0	43	2.83944	2	0.106833	1.05919e-10	-4.33084	down
c122388.graph_c0	6695	104.34	44407	559.838	0	2.25336	up
c122437.graph_c0	54	9.85336	15	2.21408	5.30811e-06	-2.24846	down
c122608.graph_c0	325521	11867.3	4076	120.204	0	-6.79524	down
c122609.graph_c0	8141	1255.55	112	13.9729	0	-6.64679	down
c122661.graph_c0	5001	576.965	1	0.0933264	0	-11.7478	down
c122751.graph_c0	1034	299.216	0	0	0	-10.4582	down
c122810.graph_c0	199	50.181	2	0.40797	0	-6.52205	down
c122815.graph_c0	156	68.5251	0	0	0	-7.73536	down
c123016.graph_c0	4	0.27951	37	2.09147	0.00558326	2.52914	up
c123022.graph_c0	58	13.5883	10	1.89518	3.41258e-09	-2.88984	down
c123029.graph_c0	6	0.281153	59	2.23643	1.96984e-05	2.67952	up
c123079.graph_c0	1	0.465331	26	9.78695	0.0048615	3.48461	up
c123116.graph_c0	69	23.9419	13	3.64892	2.74215e-10	-2.79023	down
c123142.graph_c0	71	16.3291	0	0	0	-6.60779	down
c123187.graph_c0	45	14.6431	0	0	7.11653e-14	-5.95841	down
c123217.graph_c0	20	8.97378	0	0	1.57746e-05	-4.8172	down
c123390.graph_c0	46	4.94336	0	0	3.40838e-14	-5.98962	down
c123433.graph_c0	18	3.37315	1	0.151592	0.000959834	-3.68727	down
c123466.graph_c0	35	2.48728	0	0	1.27374e-10	-5.60246	down
c123548.graph_c0	18	5.04608	0	0	7.90178e-05	-4.67087	down
c123584.graph_c0	20	6.37577	0	0	1.57746e-05	-4.8172	down
c123594.graph_c0	63	3.72229	0	0	0	-6.4372	down
c123807.graph_c0	27	3.79985	0	0	6.13591e-08	-5.23683	down
c124135.graph_c0	50	4.04859	0	0	1.77636e-15	-6.10809	down
c124337.graph_c0	24	3.57825	0	0	6.50757e-07	-5.07168	down
c124958.graph_c0	19	2.75423	1	0.117262	0.000450079	-3.76228	down
c125233.graph_c0	26	3.09056	0	0	1.34437e-07	-5.18386	down
c125269.graph_c0	24	2.57914	4	0.347725	0.00162737	-2.77607	down
c125380.graph_c0	16	1.64073	0	0	0.000400403	-4.50801	down
c125510.graph_c0	40	2.4368	0	0	2.91911e-12	-5.79139	down
c125818.graph_c0	18	2.91962	0	0	7.90178e-05	-4.67087	down
c126716.graph_c0	19	2.33824	1	0.0995514	0.000450079	-3.76228	down
c127034.graph_c0	29	2.68422	0	0	1.28878e-08	-5.33729	down
c127053.graph_c0	17	2.22758	0	0	0.000177621	-4.59174	down
c128211.graph_c0	16	2.10534	0	0	0.000400403	-4.50801	down
c129436.graph_c0	16	1.44471	0	0	0.000400403	-4.50801	down
c129724.graph_c0	23	1.67239	0	0	1.4378e-06	-5.01215	down
c131180.graph_c0	16	2.14585	0	0	0.000400403	-4.50801	down
c132038.graph_c0	25	1.69227	2	0.109515	3.83974e-05	-3.56579	down
c132609.graph_c0	17	1.49205	0	0	0.000177621	-4.59174	down
c137583.graph_c0	17	1.38907	0	0	0.000177621	-4.59174	down
c19193.graph_c0	20	2.67659	0	0	1.57746e-05	-4.8172	down
c19196.graph_c0	25	2.78192	0	0	2.95367e-07	-5.12886	down
c19562.graph_c0	29	2.40404	0	0	1.28878e-08	-5.33729	down
c19628.graph_c0	20	1.77774	0	0	1.57746e-05	-4.8172	down
c20313.graph_c0	25	1.45248	2	0.0939963	3.83974e-05	-3.56579	down
c20631.graph_c0	295	17.3481	0	0	0	-8.65133	down
c20803.graph_c0	20	3.82788	0	0	1.57746e-05	-4.8172	down
c20923.graph_c0	16	2.88627	0	0	0.000400403	-4.50801	down
c21382.graph_c0	16	2.5362	0	0	0.000400403	-4.50801	down
c22436.graph_c0	17	1.73195	0	0	0.000177621	-4.59174	down
c23664.graph_c0	17	2.23224	0	0	0.000177621	-4.59174	down
c23876.graph_c0	25	2.69122	5	0.435403	0.00288568	-2.57132	down
c24312.graph_c0	56	1.98839	17	0.488286	1.05762e-05	-2.13055	down
c24861.graph_c0	18	2.0137	0	0	7.90178e-05	-4.67087	down
c25306.graph_c0	8	1.15703	80	9.35958	1.56793e-07	2.73723	up
c25416.graph_c0	39	7.44165	9	1.38918	5.51926e-05	-2.46324	down
c25619.graph_c0	90	4.52124	20	0.812751	1.07764e-11	-2.58583	down
c25749.graph_c0	91	14.2092	0	0	0	-6.96258	down
c25844.graph_c0	16	6.24191	0	0	0.000400403	-4.50801	down
c25972.graph_c0	97	14.3937	0	0	0	-7.05398	down
c26348.graph_c0	24	1.98169	3	0.200382	0.000407788	-3.09634	down
c26548.graph_c0	88	3.84766	15	0.530539	1.25233e-13	-2.9455	down
c26615.graph_c0	67	3.93638	0	0	0	-6.52501	down
c27127.graph_c0	97	28.8686	0	0	0	-7.05398	down
c27131.graph_c0	85	12.7032	0	0	0	-6.86499	down
c30636.graph_c0	20	1.88739	0	0	1.57746e-05	-4.8172	down
c31423.graph_c0	1837	201.203	0	0	0	-11.2869	down
c31859.graph_c0	16	1.60916	0	0	0.000400403	-4.50801	down
c35577.graph_c0	21	1.99376	0	0	7.07878e-06	-4.88515	down
c36652.graph_c0	34	6.22279	0	0	2.73146e-10	-5.56151	down
c38086.graph_c0	41	7.82328	0	0	1.38223e-12	-5.82637	down
c40961.graph_c0	43	20.9413	11	4.3335	4.34813e-05	-2.33914	down
c43450.graph_c0	16	1.44888	0	0	0.000400403	-4.50801	down
c43843.graph_c0	47	8.15029	0	0	1.64313e-14	-6.02016	down
c44480.graph_c0	34	4.95151	0	0	2.73146e-10	-5.56151	down
c44511.graph_c0	19	2.09567	0	0	3.52543e-05	-4.74589	down
c44660.graph_c0	103	7.93053	28	1.74395	3.89334e-11	-2.31378	down
c45046.graph_c0	17	1.64893	0	0	0.000177621	-4.59174	down
c45404.graph_c0	650	35.6824	1	0.0444071	0	-8.80549	down
c47956.graph_c0	36	2.18253	0	0	5.95515e-11	-5.64227	down
c48065.graph_c0	6	0.649235	81	7.09002	5.91323e-09	3.13003	up
c49869.graph_c0	26	2.06528	0	0	1.34437e-07	-5.18386	down
c51188.graph_c0	30	1.99415	0	0	5.93062e-09	-5.38501	down
c52146.graph_c0	86	8.56685	0	0	0	-6.88172	down
c52459.graph_c0	24	2.37566	0	0	6.50757e-07	-5.07168	down
c52623.graph_c0	21	2.80444	0	0	7.07878e-06	-4.88515	down
c53244.graph_c0	25	2.78687	0	0	2.95367e-07	-5.12886	down
c54367.graph_c0	45	5.58173	10	1.00339	5.34113e-06	-2.52893	down
c55405.graph_c0	555	64.0303	191	17.8253	0	-2.00926	down
c56707.graph_c0	23	1.99908	5	0.351548	0.00982789	-2.45461	down
c57113.graph_c0	17	1.43583	0	0	0.000177621	-4.59174	down
c58039.graph_c0	19	2.65609	0	0	3.52543e-05	-4.74589	down
c58835.graph_c0	18	2.85322	0	0	7.90178e-05	-4.67087	down
c60029.graph_c0	25	1.61225	2	0.104336	3.83974e-05	-3.56579	down
c60144.graph_c0	20	2.14929	3	0.260794	0.00610312	-2.84186	down
c63173.graph_c0	16	1.76789	0	0	0.000400403	-4.50801	down
c63875.graph_c0	157	17.948	0	0	0	-7.74453	down
c64200.graph_c0	23	2.7083	0	0	1.4378e-06	-5.01215	down
c64878.graph_c0	22	3.20392	0	0	3.18572e-06	-4.95005	down
c66175.graph_c0	23	1.98809	0	0	1.4378e-06	-5.01215	down
c66843.graph_c0	18	1.20672	0	0	7.90178e-05	-4.67087	down
c66967.graph_c0	24	2.71397	0	0	6.50757e-07	-5.07168	down
c68322.graph_c0	37	2.75585	0	0	2.79142e-11	-5.68102	down
c68644.graph_c0	21	3.91197	0	0	7.07878e-06	-4.88515	down
c70830.graph_c0	26	1.90154	5	0.295812	0.00155136	-2.62632	down
c70864.graph_c0	18	4.07258	0	0	7.90178e-05	-4.67087	down
c71000.graph_c0	25	2.06155	0	0	2.95367e-07	-5.12886	down
c71169.graph_c0	4	0.429122	54	4.68627	7.00872e-06	3.0623	up
c71172.graph_c0	22	1.97511	0	0	3.18572e-06	-4.95005	down
c72281.graph_c0	22	2.18458	0	0	3.18572e-06	-4.95005	down
c72304.graph_c0	28	2.55398	7	0.516499	0.00394667	-2.31674	down
c72382.graph_c0	32	1.77218	0	0	1.26602e-09	-5.47596	down
c72589.graph_c0	16	1.668	0	0	0.000400403	-4.50801	down
c73032.graph_c0	29	4.57374	0	0	1.28878e-08	-5.33729	down
c73989.graph_c0	29	3.10582	0	0	1.28878e-08	-5.33729	down
c74020.graph_c0	25	4.12977	0	0	2.95367e-07	-5.12886	down
c74453.graph_c0	31	6.44442	7	1.17715	0.000691921	-2.46001	down
c74814.graph_c0	18	1.27772	1	0.0574217	0.000959834	-3.68727	down
c75071.graph_c0	1	0.115158	263	24.4998	0	6.77301	up
c75173.graph_c0	20	2.56706	0	0	1.57746e-05	-4.8172	down
c75271.graph_c0	20	1.80071	0	0	1.57746e-05	-4.8172	down
c75343.graph_c0	18	1.72723	0	0	7.90178e-05	-4.67087	down
c75424.graph_c0	25	1.74306	0	0	2.95367e-07	-5.12886	down
c75600.graph_c0	47	6.41312	0	0	1.64313e-14	-6.02016	down
c76163.graph_c0	46	4.24833	0	0	3.40838e-14	-5.98962	down
c76228.graph_c0	24	3.56977	0	0	6.50757e-07	-5.07168	down
c76536.graph_c0	17	1.59231	0	0	0.000177621	-4.59174	down
c76608.graph_c0	16	1.73129	0	0	0.000400403	-4.50801	down
c76805.graph_c0	43	7.77922	0	0	3.12195e-13	-5.8939	down
c77101.graph_c0	23	2.2875	0	0	1.4378e-06	-5.01215	down
c77744.graph_c0	19	2.34745	0	0	3.52543e-05	-4.74589	down
c78181.graph_c0	82	2.44865	3	0.0724681	0	-4.83826	down
c78516.graph_c0	23	6.01751	0	0	1.4378e-06	-5.01215	down
c78623.graph_c0	20	3.05447	0	0	1.57746e-05	-4.8172	down
c78891.graph_c0	32	1.76129	0	0	1.26602e-09	-5.47596	down
c78962.graph_c0	17	3.70597	0	0	0.000177621	-4.59174	down
c79470.graph_c0	9	0.456585	64	2.62646	0.00012563	2.26348	up
c80006.graph_c0	49	4.99209	0	0	3.77476e-15	-6.07937	down
c80086.graph_c0	17	1.87838	0	0	0.000177621	-4.59174	down
c80311.graph_c0	18	2.11954	0	0	7.90178e-05	-4.67087	down
c80344.graph_c0	41	6.08393	3	0.360109	3.51402e-09	-3.85103	down
c80470.graph_c0	16	2.39689	0	0	0.000400403	-4.50801	down
c80605.graph_c0	18	1.45	0	0	7.90178e-05	-4.67087	down
c81801.graph_c0	23	3.02643	0	0	1.4378e-06	-5.01215	down
c82020.graph_c0	0	0	21	1.29526	0.00483263	4.42797	up
c82049.graph_c0	25	1.53493	0	0	2.95367e-07	-5.12886	down
c82543.graph_c0	26	3.225	0	0	1.34437e-07	-5.18386	down
c82944.graph_c0	63	13.1841	0	0	0	-6.4372	down
c83208.graph_c0	18	1.42081	0	0	7.90178e-05	-4.67087	down
c83717.graph_c0	21	1.34874	2	0.103909	0.000674173	-3.32209	down
c84328.graph_c0	16	2.65705	0	0	0.000400403	-4.50801	down
c84432.graph_c0	27	6.75417	0	0	6.13591e-08	-5.23683	down
c84809.graph_c0	29	4.23317	0	0	1.28878e-08	-5.33729	down
c84909.graph_c0	21	2.21129	0	0	7.07878e-06	-4.88515	down
c85467.graph_c0	61	6.79995	0	0	0	-6.3912	down
c85559.graph_c0	23	1.58424	2	0.111439	0.000161097	-3.44908	down
c85606.graph_c0	19	1.95156	0	0	3.52543e-05	-4.74589	down
c85831.graph_c0	28	4.24526	0	0	2.80825e-08	-5.28793	down
c85914.graph_c0	18	3.99336	0	0	7.90178e-05	-4.67087	down
c85968.graph_c0	30	2.03953	0	0	5.93062e-09	-5.38501	down
c86277.graph_c0	16	2.62234	0	0	0.000400403	-4.50801	down
c86284.graph_c0	19	3.11403	0	0	3.52543e-05	-4.74589	down
c86719.graph_c0	559	31.5709	0	0	0	-9.57177	down
c86741.graph_c0	130	21.2233	0	0	0	-7.47368	down
c86842.graph_c0	48	9.47602	0	0	7.88258e-15	-6.05007	down
c86933.graph_c1	835168	6240.95	258249	1561.09	0	-2.16944	down
c86936.graph_c0	21	6.8691	2	0.529203	0.000674173	-3.32209	down
c87031.graph_c0	80	9.6744	0	0	0	-6.7783	down
c87511.graph_c0	546611	12194.5	6944	125.316	0	-6.77454	down
c87543.graph_c0	20	2.73792	0	0	1.57746e-05	-4.8172	down
c87614.graph_c0	19	1.82599	0	0	3.52543e-05	-4.74589	down
c87641.graph_c0	19	2.2415	0	0	3.52543e-05	-4.74589	down
c87703.graph_c0	20	2.9538	0	0	1.57746e-05	-4.8172	down
c87732.graph_c0	18	1.57322	0	0	7.90178e-05	-4.67087	down
c88131.graph_c0	17	2.26063	0	0	0.000177621	-4.59174	down
c88132.graph_c0	16	2.27731	0	0	0.000400403	-4.50801	down
c88212.graph_c0	16	3.14876	0	0	0.000400403	-4.50801	down
c88448.graph_c0	28	5.6888	0	0	2.80825e-08	-5.28793	down
c88598.graph_c0	24	3.45516	5	0.582289	0.00534197	-2.51414	down
c88861.graph_c0	25	2.78192	0	0	2.95367e-07	-5.12886	down
c88956.graph_c0	22	2.0824	0	0	3.18572e-06	-4.95005	down
c89326.graph_c0	7	1.28491	63	9.35466	1.71001e-05	2.57288	up
c89418.graph_c0	22	2.82956	0	0	3.18572e-06	-4.95005	down
c89452.graph_c0	32	5.16373	0	0	1.26602e-09	-5.47596	down
c89486.graph_c0	19	2.11802	0	0	3.52543e-05	-4.74589	down
c89556.graph_c0	42	2.27772	0	0	6.56142e-13	-5.86053	down
c89762.graph_c0	33	7.16904	0	0	5.87282e-10	-5.51937	down
c89940.graph_c0	19	1.53253	0	0	3.52543e-05	-4.74589	down
c90065.graph_c0	22	2.91317	0	0	3.18572e-06	-4.95005	down
c90113.graph_c0	16	2.8174	0	0	0.000400403	-4.50801	down
c90201.graph_c0	22	2.70743	0	0	3.18572e-06	-4.95005	down
c90278.graph_c0	17	2.69471	0	0	0.000177621	-4.59174	down
c90739.graph_c0	24	2.15158	0	0	6.50757e-07	-5.07168	down
c91146.graph_c0	46	7.70016	6	0.812467	2.05783e-08	-3.21048	down
c91376.graph_c0	18	5.16118	0	0	7.90178e-05	-4.67087	down
c91452.graph_c0	17	1.90864	0	0	0.000177621	-4.59174	down
c91592.graph_c0	16	1.79958	0	0	0.000400403	-4.50801	down
c91720.graph_c0	21	1.94375	0	0	7.07878e-06	-4.88515	down
c91838.graph_c0	57	16.2324	18	4.14661	1.44532e-05	-2.07785	down
c92004.graph_c0	45	4.17133	0	0	7.11653e-14	-5.95841	down
c92036.graph_c0	7	0.266985	49	1.51181	0.0023845	2.21688	up
c92278.graph_c0	19	1.34871	0	0	3.52543e-05	-4.74589	down
c92420.graph_c0	19	2.28885	0	0	3.52543e-05	-4.74589	down
c92667.graph_c0	24	3.63002	0	0	6.50757e-07	-5.07168	down
c92764.graph_c0	34	7.28536	0	0	2.73146e-10	-5.56151	down
c93151.graph_c0	28	3.50776	0	0	2.80825e-08	-5.28793	down
c93357.graph_c0	94	9.58445	0	0	0	-7.009	down
c93481.graph_c0	31	2.0738	0	0	2.73647e-09	-5.4312	down
c93602.graph_c0	16	1.44264	0	0	0.000400403	-4.50801	down
c93850.graph_c0	48	2.02668	0	0	7.88258e-15	-6.05007	down
c93889.graph_c0	31	1.61822	0	0	2.73647e-09	-5.4312	down
c94103.graph_c0	31	7.0777	0	0	2.73647e-09	-5.4312	down
c94313.graph_c0	22	2.35614	0	0	3.18572e-06	-4.95005	down
c94520.graph_c0	25	2.31058	0	0	2.95367e-07	-5.12886	down
c94556.graph_c0	18	1.92447	0	0	7.90178e-05	-4.67087	down
c94619.graph_c0	17	2.6154	0	0	0.000177621	-4.59174	down
c94871.graph_c0	51	4.99312	0	0	8.88178e-16	-6.13625	down
c95124.graph_c0	30	2.41358	0	0	5.93062e-09	-5.38501	down
c95276.graph_c0	21	2.32855	0	0	7.07878e-06	-4.88515	down
c95555.graph_c0	22	2.17769	0	0	3.18572e-06	-4.95005	down
c95621.graph_c0	21	2.136	0	0	7.07878e-06	-4.88515	down
c95670.graph_c0	3	0.213195	42	2.41445	0.000174267	3.04959	up
c95700.graph_c0	18	2.03182	0	0	7.90178e-05	-4.67087	down
c95709.graph_c0	42	6.5256	13	1.6339	0.000421952	-2.08377	down
c95774.graph_c0	20	2.60436	0	0	1.57746e-05	-4.8172	down
c95783.graph_c0	30	2.5304	0	0	5.93062e-09	-5.38501	down
c95831.graph_c0	24	2.19551	0	0	6.50757e-07	-5.07168	down
c95848.graph_c0	36	2.23656	0	0	5.95515e-11	-5.64227	down
c95864.graph_c0	31	4.57838	0	0	2.73647e-09	-5.4312	down
c95875.graph_c0	16	2.77457	0	0	0.000400403	-4.50801	down
c95881.graph_c0	20	2.22949	0	0	1.57746e-05	-4.8172	down
c95905.graph_c0	26	2.50255	0	0	1.34437e-07	-5.18386	down
c96001.graph_c0	23	2.1705	0	0	1.4378e-06	-5.01215	down
c96070.graph_c0	19	1.76383	0	0	3.52543e-05	-4.74589	down
c96075.graph_c0	30	2.5719	0	0	5.93062e-09	-5.38501	down
c96138.graph_c0	21	2.1712	0	0	7.07878e-06	-4.88515	down
c96202.graph_c0	8299	246.181	708	16.9893	0	-4.0253	down
c96265.graph_c0	32	2.47299	0	0	1.26602e-09	-5.47596	down
c96353.graph_c0	16	2.39689	0	0	0.000400403	-4.50801	down
c96389.graph_c0	18	2.89343	0	0	7.90178e-05	-4.67087	down
c96409.graph_c0	28	3.11024	0	0	2.80825e-08	-5.28793	down
c96429.graph_c0	35	2.90576	0	0	1.27374e-10	-5.60246	down
c96609.graph_c0	21	3.33719	0	0	7.07878e-06	-4.88515	down
c96681.graph_c0	19	2.1681	0	0	3.52543e-05	-4.74589	down
c96702.graph_c0	21	2.20759	0	0	7.07878e-06	-4.88515	down
c96710.graph_c0	23	2.29113	0	0	1.4378e-06	-5.01215	down
c96812.graph_c0	3	0.26262	166	11.7551	0	5.00645	up
c96911.graph_c0	1	0.0697999	35	1.97622	7.78361e-05	3.89934	up
c96997.graph_c0	17	2.75031	0	0	0.000177621	-4.59174	down
c97005.graph_c0	26	2.54155	0	0	1.34437e-07	-5.18386	down
c97016.graph_c0	26	2.25671	0	0	1.34437e-07	-5.18386	down
c97273.graph_c0	2	0.28793	63	7.33684	3.72338e-09	4.07257	up
c97310.graph_c0	94	13.5951	0	0	0	-7.009	down
c97434.graph_c0	33	2.50097	0	0	5.87282e-10	-5.51937	down
c97484.graph_c0	16	2.51082	0	0	0.000400403	-4.50801	down
c97539.graph_c0	24	2.57473	0	0	6.50757e-07	-5.07168	down
c97557.graph_c0	50	3.46302	0	0	1.77636e-15	-6.10809	down
c97749.graph_c0	38	3.10903	0	0	1.31181e-11	-5.71876	down
c97978.graph_c0	25	4.79949	0	0	2.95367e-07	-5.12886	down
c98234.graph_c0	21	2.5543	0	0	7.07878e-06	-4.88515	down
c98297.graph_c0	35	5.17328	0	0	1.27374e-10	-5.60246	down
c98348.graph_c0	1	0.295637	27	6.45706	0.00307036	3.53704	up
c98476.graph_c1	39	2.52029	0	0	6.18039e-12	-5.75553	down
c98509.graph_c0	106	22.0358	0	0	0	-7.18107	down
c98616.graph_c0	4	0.666025	46	6.19584	0.000165395	2.83563	up
c98692.graph_c0	20	2.24144	0	0	1.57746e-05	-4.8172	down
c98700.graph_c0	18	2.38855	0	0	7.90178e-05	-4.67087	down
c98730.graph_c0	18	1.54949	0	0	7.90178e-05	-4.67087	down
c98813.graph_c0	19	1.50446	0	0	3.52543e-05	-4.74589	down
c99012.graph_c0	34	3.30297	0	0	2.73146e-10	-5.56151	down
c99017.graph_c0	41	4.77407	0	0	1.38223e-12	-5.82637	down
c99075.graph_c0	22	2.46559	0	0	3.18572e-06	-4.95005	down
c99231.graph_c0	45	7.73929	0	0	7.11653e-14	-5.95841	down
c99407.graph_c0	20	2.65394	0	0	1.57746e-05	-4.8172	down
c99427.graph_c0	4	0.259292	36	1.88775	0.00820136	2.49069	up
c99501.graph_c0	51	5.71568	0	0	8.88178e-16	-6.13625	down
c99540.graph_c0	39	3.6584	0	0	6.18039e-12	-5.75553	down
c99611.graph_c0	27	0.73458	7	0.154058	0.00698244	-2.26564	down
c99617.graph_c0	20	2.22949	0	0	1.57746e-05	-4.8172	down
c99662.graph_c0	26	3.33036	0	0	1.34437e-07	-5.18386	down
c99666.graph_c0	31	2.46557	0	0	2.73647e-09	-5.4312	down
c99690.graph_c0	17	1.92935	0	0	0.000177621	-4.59174	down
c99697.graph_c0	28	2.41696	0	0	2.80825e-08	-5.28793	down
c99755.graph_c0	31	2.19555	0	0	2.73647e-09	-5.4312	down
c99816.graph_c0	35	3.20179	0	0	1.27374e-10	-5.60246	down
c99837.graph_c0	37	3.15477	0	0	2.79142e-11	-5.68102	down
c99868.graph_c0	16	2.92837	0	0	0.000400403	-4.50801	down
c99889.graph_c0	22	3.15997	0	0	3.18572e-06	-4.95005	down

## Sheet: AF-vs-AM annotation
#ID	AF_count	AF_FPKM	AM_count	AM_FPKM	FDR	log2FC	regulated	COG_class	COG_class_annotation	GO_annotation	KEGG_annotation	KOG_class	KOG_class_annotation	Pfam_annotation	Swissprot_annotation	nr_annotation
c75071.graph_c0	1	0.115158	263	24.4998	0	6.77301	up	[Z]	Cytoskeleton	--	K11652|1.26842e-74|xtr:100127559|uncharacterized LOC100127559; K11652 actin-like protein 6B (A)	[Z]	Cytoskeleton	Actin	Actin, alpha skeletal muscle (Fragment) OS=Pleurodeles waltl (Iberian ribbed newt) PE=2 SV=1	uncharacterized protein LOC100127559 [Xenopus (Silurana) tropicalis]
c111830.graph_c0	0	0	73	3.38695	1.33e-13	6.17693	up	[R]	General function prediction only	Cellular Component: mitochondrial outer membrane (GO:0005741);; Cellular Component: integral component of membrane (GO:0016021);; Molecular Function: oxidoreductase activity (GO:0016491);; Molecular Function: molybdenum ion binding (GO:0030151);; Molecular Function: pyridoxal phosphate binding (GO:0030170);; Biological Process: oxidation-reduction process (GO:0055114);;	--	[R]	General function prediction only	MOSC domain;; MOSC N-terminal beta barrel domain	Mitochondrial amidoxime-reducing component 1 GN=marc1 OS=Xenopus laevis (African clawed frog) PE=2 SV=1	MOSC domain-containing protein 1, mitochondrial-like [Xenopus (Silurana) tropicalis]
c107611.graph_c0	2	0.0703237	139	3.95366	0	5.20157	up	--	--	Cellular Component: nucleus (GO:0005634);; Cellular Component: cytoplasm (GO:0005737);; Biological Process: epithelial cell differentiation (GO:0030855);; Cellular Component: keratin filament (GO:0045095);; Biological Process: intermediate filament bundle assembly (GO:0045110);;	K07604|2.81879e-142|xla:380402|krt-b, krt, krt1-2, xk70; keratin; K07604 type I keratin, acidic (A)	--	--	Intermediate filament protein	Keratin, type I cytoskeletal 47 kDa GN=xk70a OS=Xenopus laevis (African clawed frog) PE=2 SV=2	keratin [Xenopus laevis]
c96812.graph_c0	3	0.26262	166	11.7551	0	5.00645	up	--	--	Cellular Component: membrane (GO:0016020);;	--	[R]	General function prediction only	Tetraspanin family	--	MGC81526 protein [Xenopus laevis]
c121283.graph_c0	20	1.82989	767	56.7677	0	4.73483	up	--	--	--	--	--	--	--	--	PREDICTED: uncharacterized protein LOC101734130, partial [Xenopus (Silurana) tropicalis]
c82020.graph_c0	0	0	21	1.29526	0.00483263	4.42797	up	--	--	--	--	--	--	--	--	PREDICTED: LINE-1 type transposase domain-containing protein 1-like [Xenopus (Silurana) tropicalis]
c97273.graph_c0	2	0.28793	63	7.33684	3.72e-09	4.07257	up	--	--	--	--	--	--	--	--	unnamed protein product [Oncorhynchus mykiss]
c116438.graph_c0	17	1.4109	412	27.6603	0	4.06537	up	--	--	--	--	[R]	General function prediction only	--	--	PREDICTED: uncharacterized protein LOC100490320 [Xenopus (Silurana) tropicalis]
c123079.graph_c0	1	0.465331	26	9.78695	0.0048615	3.48461	up	[Z]	Cytoskeleton	--	--	[Z]	Cytoskeleton	Actin	Actin, aortic smooth muscle (Precursor) GN=ACTA2 OS=Gallus gallus (Chicken) PE=1 SV=2	PREDICTED: actin-85C-like, partial [Notothenia coriiceps]
c71169.graph_c0	4	0.429122	54	4.68627	7.01e-06	3.0623	up	--	--	--	--	--	--	--	--	PREDICTED: uncharacterized protein LOC100331538 [Danio rerio]
c112971.graph_c0	19	0.779173	186	6.17029	1.44e-15	2.76821	up	--	--	Molecular Function: metallopeptidase activity (GO:0008237);; Molecular Function: metal ion binding (GO:0046872);;	--	[OW]	--	Hemopexin	Matrix metalloproteinase-21 (Precursor) GN=mmp21 OS=Xenopus laevis (African clawed frog) PE=2 SV=1	PREDICTED: matrix metalloproteinase-21-like [Xenopus (Silurana) tropicalis]
c123029.graph_c0	6	0.281153	59	2.23643	1.97e-05	2.67952	up	[E]	Amino acid transport and metabolism	Molecular Function: metallocarboxypeptidase activity (GO:0004181);; Biological Process: proteolysis (GO:0006508);; Molecular Function: zinc ion binding (GO:0008270);;	K01291|0|xla:495368|cpb1; carboxypeptidase B1 (tissue); K01291 carboxypeptidase B [EC:3.4.17.2] (A)	[S]	Function unknown	Zinc carboxypeptidase;; Carboxypeptidase activation peptide	--	carboxypeptidase B1 (tissue) precursor [Xenopus laevis]
c123016.graph_c0	4	0.27951	37	2.09147	0.00558326	2.52914	up	--	--	Biological Process: skeletal muscle contraction (GO:0003009);; Molecular Function: actin binding (GO:0003779);; Cellular Component: nucleus (GO:0005634);; Cellular Component: troponin complex (GO:0005861);; Molecular Function: troponin T binding (GO:0031014);; Biological Process: positive regulation of transcription, DNA-templated (GO:0045893);; Molecular Function: metal ion binding (GO:0046872);;	K12043|4.45139e-93|xtr:496523|tnni2, amcd2b, da2b, fssv, fstni; troponin I type 2 (skeletal, fast); K12043 troponin I, fast skeletal muscle (A)	[Z]	Cytoskeleton	Troponin	Troponin I, fast skeletal muscle GN=TNNI2 OS=Coturnix coturnix japonica (Japanese quail) PE=3 SV=2	fast troponin I [Rana catesbeiana]
c109275.graph_c0	32	2.53867	249	15.9796	2.22e-16	2.45699	up	--	--	--	--	[R]	General function prediction only	Fibrinogen beta and gamma chains, C-terminal globular domain	Fibrinogen gamma chain (Precursor) GN=fgg OS=Xenopus laevis (African clawed frog) PE=2 SV=1	novel protein similar to human angiopoietin-like ANGPTL [Xenopus (Silurana) tropicalis]
c120261.graph_c0	8	0.415604	59	2.47944	0.000227741	2.30441	up	--	--	Cellular Component: integral component of membrane (GO:0016021);;	K15377|0|xtr:100489321|slc44a4; solute carrier family 44, member 4; K15377 solute carrier family 44 (choline transporter-like protein), member 2/4/5 (A)	[I]	Lipid transport and metabolism	Plasma-membrane choline transporter	Choline transporter-like protein 4 GN=slc44a4 OS=Xenopus laevis (African clawed frog) PE=2 SV=1	PREDICTED: choline transporter-like protein 4 [Xenopus (Silurana) tropicalis]
c119575.graph_c1	59	2.34957	407	13.1112	0	2.29585	up	[E]	Amino acid transport and metabolism	Biological Process: potassium ion transport (GO:0006813);; Molecular Function: symporter activity (GO:0015293);; Cellular Component: integral component of membrane (GO:0016021);; Biological Process: transmembrane transport (GO:0055085);;	K14428|0|xla:446259|slc12a8; solute carrier family 12, member 8; K14428 solute carrier family 12 (potassium/chloride transporters), member 8 (A)	[P]	Inorganic ion transport and metabolism	Amino acid permease;; Amino acid permease	Solute carrier family 12 member 8 GN=slc12a8 OS=Xenopus laevis (African clawed frog) PE=2 SV=1	SLC12A8 cation-chloride cotransporter [Xenopus laevis]
c100092.graph_c0	19	2.40427	133	13.6142	2.95e-09	2.28747	up	--	--	Molecular Function: binding (GO:0005488);;	K13826|3.49484e-17|xtr:548658|hba3, Ta-globin, hba-l8; hemoglobin alpha 3 subunit; K13826 hemoglobin subunit zeta (A)	[C]	Energy production and conversion	Globin	Hemoglobin heart muscle subunit alpha-type OS=Lithobates catesbeiana (American bullfrog) PE=1 SV=1	hemoglobin A chain [Bufo gargarizans]
c79470.graph_c0	9	0.456585	64	2.62646	0.00012563	2.26348	up	[P]	Inorganic ion transport and metabolism	Molecular Function: transporter activity (GO:0005215);; Biological Process: sodium ion transport (GO:0006814);; Cellular Component: membrane (GO:0016020);; Biological Process: transmembrane transport (GO:0055085);;	K14445|0|xtr:493460|slc13a2, nact, nadc-1, nadc1, sdct1; solute carrier family 13 (sodium-dependent dicarboxylate transporter), member 2; K14445 solute carrier family 13 (sodium-dependent dicarboxylate transporter), member 2/3/5 (A)	[P]	Inorganic ion transport and metabolism	Sodium:sulfate symporter transmembrane region;; Citrate transporter	--	solute carrier family 13, member 2 [Xenopus (Silurana) tropicalis]
c122388.graph_c0	6695	104.34	44407	559.838	0	2.25336	up	--	--	--	--	[O]	Posttranslational modification, protein turnover, chaperones	A-macroglobulin complement component;; Alpha-2-macroglobulin family;; Alpha-2-macroglobulin family N-terminal region;; A-macroglobulin receptor;; MG2 domain;; Trefoil (P-type) domain;; Prenyltransferase-like;; Seminal vesicle autoantigen (SVA);; Alpha-macro-globulin thiol-ester bond-forming region	Ovostatin (Precursor) OS=Gallus gallus (Chicken) PE=1 SV=3	monomeric alpha-macroglobulin [Rana catesbeiana]
c119575.graph_c0	54	3.67116	321	17.6533	4.77e-15	2.08047	up	--	--	Biological Process: ion transport (GO:0006811);; Cellular Component: membrane (GO:0016020);;	K14428|4.2863e-134|xtr:100488646|solute carrier family 12 member 8-like; K14428 solute carrier family 12 (potassium/chloride transporters), member 8 (A)	[P]	Inorganic ion transport and metabolism	--	Solute carrier family 12 member 8 GN=slc12a8 OS=Xenopus laevis (African clawed frog) PE=2 SV=1	PREDICTED: solute carrier family 12 member 8-like [Xenopus (Silurana) tropicalis]
c120708.graph_c0	26	1.4088	149	6.53093	2.28e-08	2.01221	up	--	--	--	--	--	--	--	--	PREDICTED: uncharacterized protein LOC101733852 [Xenopus (Silurana) tropicalis]
c55405.graph_c0	555	64.0303	191	17.8253	0	-2.00926	down	[I]	Lipid transport and metabolism	Molecular Function: fatty-acyl-CoA binding (GO:0000062);; Cellular Component: endoplasmic reticulum (GO:0005783);; Cellular Component: Golgi apparatus (GO:0005794);; Biological Process: transport (GO:0006810);; Molecular Function: lipid binding (GO:0008289);;	--	[I]	Lipid transport and metabolism	Acyl CoA binding protein	Acyl-CoA-binding protein homolog OS=Pelophylax ridibundus (Marsh frog) PE=1 SV=2	diazepam binding inhibitor [Bufo gargarizans]
c113809.graph_c1	2633	167.579	904	46.5426	0	-2.01723	down	--	--	Molecular Function: aspartic-type endopeptidase activity (GO:0004190);; Biological Process: proteolysis (GO:0006508);;	--	[O]	Posttranslational modification, protein turnover, chaperones	Eukaryotic aspartyl protease;; Xylanase inhibitor C-terminal	Cathepsin E-A (Precursor) GN=ctse-a OS=Xenopus laevis (African clawed frog) PE=1 SV=1	PREDICTED: cathepsin E-A-like [Xenopus (Silurana) tropicalis]
c112498.graph_c0	2499	86.5528	811	22.7221	0	-2.09833	down	[Q]	Secondary metabolites biosynthesis, transport and catabolism	Molecular Function: monooxygenase activity (GO:0004497);; Molecular Function: iron ion binding (GO:0005506);; Molecular Function: electron carrier activity (GO:0009055);; Molecular Function: oxidoreductase activity, acting on paired donors, with incorporation or reduction of molecular oxygen (GO:0016705);; Molecular Function: heme binding (GO:0020037);; Biological Process: oxidation-reduction pro…	K05917|0|xtr:548948|cyp51a1; cytochrome P450, family 51, subfamily A, polypeptide 1 (EC:1.14.13.70); K05917 sterol 14-demethylase [EC:1.14.13.70] (A)	[Q]	Secondary metabolites biosynthesis, transport and catabolism	Cytochrome P450	Cytochrome P450 26A1 GN=cyp26a1 OS=Xenopus laevis (African clawed frog) PE=2 SV=1	lanosterol 14-alpha demethylase [Xenopus (Silurana) tropicalis]
c24312.graph_c0	56	1.98839	17	0.488286	1.06e-05	-2.13055	down	[G]	Carbohydrate transport and metabolism	--	--	--	--	PEP-utilising enzyme, TIM barrel domain;; PEP-utilising enzyme, mobile domain;; Pyruvate phosphate dikinase, PEP/pyruvate binding domain	--	--
c86933.graph_c1	835168	6240.95	258249	1561.09	0	-2.16944	down	--	--	--	--	--	--	--	--	hypothetical protein [Callorhinchus milii]
c111276.graph_c0	76	2.47444	22	0.579426	4.87e-08	-2.21295	down	[TZDR]	--	Cellular Component: photoreceptor inner segment (GO:0001917);; Molecular Function: calcium ion binding (GO:0005509);; Biological Process: mechanosensory behavior (GO:0007638);; Molecular Function: kinase activity (GO:0016301);; Biological Process: phosphorylation (GO:0016310);; Biological Process: camera-type eye development (GO:0043010);; Biological Process: photoreceptor cell maintenance (GO:00…	--	[R]	General function prediction only	EF-hand domain pair;; EF hand;; EF-hand domain	--	calcium and integrin binding family member 2 [Xenopus (Silurana) tropicalis]
c107905.graph_c0	30	0.792151	8	0.170879	0.0032857	-2.24435	down	[RTKL]	--	--	K05119|0|xtr:100498306|alk; anaplastic lymphoma receptor tyrosine kinase; K05119 anaplastic lymphoma kinase [EC:2.7.10.1] (A)	[T]	Signal transduction mechanisms	Protein tyrosine kinase;; Protein kinase domain	Insulin-like growth factor 1 receptor beta chain (Precursor) GN=igf1r OS=Xenopus laevis (African clawed frog) PE=1 SV=1	PREDICTED: ALK tyrosine kinase receptor [Xenopus (Silurana) tropicalis]
c99611.graph_c0	27	0.73458	7	0.154058	0.00698244	-2.26564	down	[O]	Posttranslational modification, protein turnover, chaperones	--	--	[O]	Posttranslational modification, protein turnover, chaperones	ATPase family associated with various cellular activities (AAA)	Fidgetin GN=fign OS=Danio rerio (Zebrafish) PE=2 SV=1	PREDICTED: fidgetin-like [Xenopus (Silurana) tropicalis]
c104437.graph_c1	48	1.80227	13	0.394851	1.95e-05	-2.27331	down	[T]	Signal transduction mechanisms	--	K07817|0|xtr:100495746|ptprn2; protein tyrosine phosphatase, receptor type, N polypeptide 2; K07817 receptor-type tyrosine-protein phosphatase N [EC:3.1.3.48] (A)	[T]	Signal transduction mechanisms	Protein-tyrosine phosphatase;; Protein-tyrosine phosphatase receptor IA-2	Receptor-type tyrosine-protein phosphatase F (Precursor) GN=ptprf OS=Danio rerio (Zebrafish) PE=2 SV=1	PREDICTED: receptor-type tyrosine-protein phosphatase N2 [Xenopus (Silurana) tropicalis]
c115329.graph_c1	84	3.66765	23	0.81236	2.83e-09	-2.29469	down	--	--	--	K01046|4.2428e-130|xla:447524|pnliprp1; pancreatic lipase-related protein 1 (EC:3.1.1.3); K01046 triacylglycerol lipase [EC:3.1.1.3] (A)	--	--	Lipase	Lipase member H-A (Precursor) GN=liph-a OS=Xenopus laevis (African clawed frog) PE=2 SV=1	pancreatic lipase-related protein 1 precursor [Xenopus laevis]
c116366.graph_c0	88	8.2268	24	1.81498	1.06e-09	-2.30239	down	--	--	--	--	[O]	Posttranslational modification, protein turnover, chaperones	Ring finger domain;; zinc-RING finger domain;; Zinc finger, C3HC4 type (RING finger);; Zinc finger, C3HC4 type (RING finger)	E3 ubiquitin-protein ligase rnf152-B GN=rnf152-b OS=Xenopus laevis (African clawed frog) PE=2 SV=1	PREDICTED: uncharacterized protein LOC100496442 [Xenopus (Silurana) tropicalis]
c44660.graph_c0	103	7.93053	28	1.74395	3.89e-11	-2.31378	down	[Q]	Secondary metabolites biosynthesis, transport and catabolism	Molecular Function: steroid 17-alpha-monooxygenase activity (GO:0004508);; Molecular Function: iron ion binding (GO:0005506);; Biological Process: steroid biosynthetic process (GO:0006694);; Molecular Function: electron carrier activity (GO:0009055);; Cellular Component: membrane (GO:0016020);; Molecular Function: heme binding (GO:0020037);; Molecular Function: 17-alpha-hydroxyprogesterone aldola…	K00512|5.04949e-164|xtr:100145650|cyp17a1; cytochrome P450, family 17, subfamily A, polypeptide 1 (EC:1.14.99.9); K00512 steroid 17alpha-monooxygenase / 17alpha-hydroxyprogesterone aldolase [EC:1.14.99.9 4.1.2.30] (A)	[Q]	Secondary metabolites biosynthesis, transport and catabolism	Cytochrome P450	Steroid 17-alpha-hydroxylase/17,20 lyase GN=CYP17A1 OS=Rana dybowskii (Dybovsky&apos;s frog) PE=2 SV=1	cytochrome P450, family 17, subfamily A, polypeptide 1 [Glandirana rugosa]
c72304.graph_c0	28	2.55398	7	0.516499	0.00394667	-2.31674	down	[J]	Translation, ribosomal structure and biogenesis	Cellular Component: cytoplasm (GO:0005737);; Cellular Component: ribonucleoprotein complex (GO:0030529);; Cellular Component: intracellular non-membrane-bounded organelle (GO:0043232);;	K02984|6.3357e-67|nve:NEMVE_v1g242621|hypothetical protein; K02984 small subunit ribosomal protein S3Ae (A)	[J]	Translation, ribosomal structure and biogenesis	Ribosomal S3Ae family	40S ribosomal protein S3a {ECO:0000255|HAMAP-Rule:MF_03122} OS=Gecko japonicus (Japanese gecko) PE=2 SV=3	PREDICTED: 40S ribosomal protein S3a [Astyanax mexicanus]
c120763.graph_c1	150	11.2057	40	2.41725	3e-15	-2.35365	down	--	--	Molecular Function: binding (GO:0005488);;	--	--	--	--	--	PREDICTED: uncharacterized protein LOC101735159 [Xenopus (Silurana) tropicalis]
c120357.graph_c0	673	14.0728	182	3.07857	0	-2.3563	down	[HC]	--	Molecular Function: squalene monooxygenase activity (GO:0004506);; Cellular Component: integral component of membrane (GO:0016021);; Molecular Function: flavin adenine dinucleotide binding (GO:0050660);; Biological Process: oxidation-reduction process (GO:0055114);;	K00511|0|xtr:100491400|sqle; squalene epoxidase; K00511 squalene monooxygenase [EC:1.14.13.132] (A)	[I]	Lipid transport and metabolism	Squalene epoxidase;; FAD binding domain;; FAD dependent oxidoreductase;; FAD binding domain	--	PREDICTED: squalene monooxygenase [Xenopus (Silurana) tropicalis]
c56707.graph_c0	23	1.99908	5	0.351548	0.00982789	-2.45461	down	[S]	Function unknown	--	--	--	--	Protein of unknown function (DUF1237)	--	--
c112966.graph_c0	35	2.77885	8	0.513805	0.000192454	-2.4618	down	--	--	--	--	--	--	--	--	unnamed protein product [Oncorhynchus mykiss]
c120071.graph_c0	32	3.69564	7	0.653959	0.000384382	-2.50476	down	--	--	--	--	--	--	ENV polyprotein (coat polyprotein)	--	PREDICTED: ERV-FRD provirus ancestral Env polyprotein-like [Xenopus (Silurana) tropicalis]
c88598.graph_c0	24	3.45516	5	0.582289	0.00534197	-2.51414	down	[J]	Translation, ribosomal structure and biogenesis	Molecular Function: translation elongation factor activity (GO:0003746);; Molecular Function: GTPase activity (GO:0003924);; Molecular Function: GTP binding (GO:0005525);; Cellular Component: cytoplasm (GO:0005737);; Biological Process: GTP catabolic process (GO:0006184);; Biological Process: translational elongation (GO:0006414);;	K03231|1.31243e-44|chx:102173787|elongation factor 1-alpha 1-like; K03231 elongation factor 1-alpha (A)	[J]	Translation, ribosomal structure and biogenesis	Elongation factor Tu C-terminal domain	Elongation factor 1-alpha, oocyte form OS=Xenopus laevis (African clawed frog) PE=1 SV=2	elongation factor 1a [Danio rerio]
c23876.graph_c0	25	2.69122	5	0.435403	0.00288568	-2.57132	down	[J]	Translation, ribosomal structure and biogenesis	Molecular Function: structural constituent of ribosome (GO:0003735);; Cellular Component: ribosome (GO:0005840);; Biological Process: translation (GO:0006412);;	K02930|6.67884e-63|nve:NEMVE_v1g237610|hypothetical protein; K02930 large subunit ribosomal protein L4e (A)	[A]	RNA processing and modification	Ribosomal protein L4/L1 family;; 60S ribosomal protein L4 C-terminal domain	60S ribosomal protein L4-A GN=rpl4-a OS=Xenopus laevis (African clawed frog) PE=2 SV=2	ribosomal protein L4 [Latimeria chalumnae]
c118878.graph_c3	55	5.98352	12	1.05606	1.77e-07	-2.57366	down	--	--	--	--	--	--	L1 transposable element	--	PREDICTED: mucin-5AC-like [Xenopus (Silurana) tropicalis]
c25619.graph_c0	90	4.52124	20	0.812751	1.08e-11	-2.58583	down	--	--	--	--	[R]	General function prediction only	Sulfotransferase domain	Sulfotransferase family cytosolic 1B member 1 GN=SULT1B1 OS=Gallus gallus (Chicken) PE=2 SV=1	uncharacterized protein LOC100037047 [Xenopus laevis]
c70830.graph_c0	26	1.90154	5	0.295812	0.00155136	-2.62632	down	--	--	Biological Process: microtubule bundle formation (GO:0001578);; Cellular Component: cytoplasm (GO:0005737);; Cellular Component: microtubule (GO:0005874);; Molecular Function: tubulin binding (GO:0015631);;	--	[RT]	--	p25-alpha	Tubulin polymerization-promoting protein family member 3 GN=tppp3 OS=Xenopus laevis (African clawed frog) PE=2 SV=1	tubulin polymerization-promoting protein family member 3 [Xenopus laevis]
c120540.graph_c1	82	4.01957	17	0.674103	2.58e-11	-2.6748	down	--	--	Biological Process: response to acid chemical (GO:0001101);; Cellular Component: integral component of plasma membrane (GO:0005887);; Biological Process: memory (GO:0007613);; Biological Process: associative learning (GO:0008306);; Molecular Function: ligand-gated sodium channel activity (GO:0015280);; Biological Process: sodium ion transmembrane transport (GO:0035725);; Biological Process: regul…	K04829|0|xtr:100489966|asic1; acid-sensing (proton-gated) ion channel 1; K04829 acid-sensing ion channel 1 (A)	[PT]	--	Amiloride-sensitive sodium channel	Acid-sensing ion channel 1 GN=ASIC1 OS=Gallus gallus (Chicken) PE=1 SV=1	PREDICTED: acid-sensing ion channel 1 isoform X1 [Xenopus (Silurana) tropicalis]
c117128.graph_c0	107	2.99022	22	0.497341	2.52e-14	-2.70248	down	--	--	Molecular Function: phorbol ester receptor activity (GO:0001565);; Cellular Component: intracellular (GO:0005622);; Molecular Function: Rac GTPase activator activity (GO:0030675);; Biological Process: positive regulation of Rac GTPase activity (GO:0032855);; Biological Process: intracellular signal transduction (GO:0035556);; Molecular Function: metal ion binding (GO:0046872);;	--	[T]	Signal transduction mechanisms	RhoGAP domain;; Phorbol esters/diacylglycerol binding domain (C1 domain)	Rho GTPase-activating protein 15 GN=ARHGAP15 OS=Gallus gallus (Chicken) PE=2 SV=1	chimerin 1 [Xenopus (Silurana) tropicalis]
c125269.graph_c0	24	2.57914	4	0.347725	0.00162737	-2.77607	down	[J]	Translation, ribosomal structure and biogenesis	Biological Process: ribosomal small subunit assembly (GO:0000028);; Biological Process: endonucleolytic cleavage in ITS1 to separate SSU-rRNA from 5.8S rRNA and LSU-rRNA from tricistronic rRNA transcript (SSU-rRNA, 5.8S rRNA, LSU-rRNA) (GO:0000447);; Biological Process: endonucleolytic cleavage to generate mature 3'-end of SSU-rRNA from (SSU-rRNA, 5.8S rRNA, LSU-rRNA) (GO:0000461);; Molecular Fun…	K02998|3.69218e-86|tad:TRIADDRAFT_49917|expressed hypothetical protein; K02998 small subunit ribosomal protein SAe (A)	[J]	Translation, ribosomal structure and biogenesis	Ribosomal protein S2	40S ribosomal protein SA {ECO:0000255|HAMAP-Rule:MF_03016} OS=Taeniopygia guttata (Zebra finch) PE=2 SV=1	PREDICTED: 40S ribosomal protein SA isoform X2 [Cariama cristata]
c26548.graph_c0	88	3.84766	15	0.530539	1.25e-13	-2.9455	down	--	--	Molecular Function: serine-type endopeptidase inhibitor activity (GO:0004867);; Molecular Function: protein binding (GO:0005515);; Biological Process: defense response (GO:0006952);; Biological Process: regulation of cell migration (GO:0030334);; Biological Process: positive regulation of response to external stimulus (GO:0032103);; Biological Process: regulation of angiogenesis (GO:0045765);; Bi…	K03982|0|xtr:100127732|serpine1; serpin peptidase inhibitor, clade E (nexin, plasminogen activator inhibitor type 1), member 1; K03982 plasminogen activator inhibitor-1 (A)	[V]	Defense mechanisms	Serpin (serine protease inhibitor)	Neuroserpin (Precursor) GN=SERPINI1 OS=Gallus gallus (Chicken) PE=1 SV=1	LOC100127732 protein [Xenopus (Silurana) tropicalis]
c118184.graph_c0	22	1.25716	3	0.138676	0.00158793	-2.9747	down	--	--	--	--	--	--	--	--	PREDICTED: filaggrin-like [Xenopus (Silurana) tropicalis]
c118528.graph_c1	220	3.69318	35	0.47529	0	-3.09147	down	--	--	--	K06762|0|xtr:100216195|cntn4, axcam, big-2, cntn4a; contactin 4; K06762 contactin 4 (A)	[T]	Signal transduction mechanisms	Immunoglobulin I-set domain;; Immunoglobulin domain;; Immunoglobulin domain;; Immunoglobulin domain;; Fibronectin type III domain;; Immunoglobulin V-set domain;; CD80-like C2-set immunoglobulin domain	Contactin-5 (Precursor) GN=CNTN5 OS=Gallus gallus (Chicken) PE=1 SV=1	contactin 4 precursor [Xenopus (Silurana) tropicalis]
c120158.graph_c0	484	24.3066	78	3.16874	0	-3.09299	down	--	--	Molecular Function: metalloendopeptidase activity (GO:0004222);; Cellular Component: proteinaceous extracellular matrix (GO:0005578);; Biological Process: proteolysis (GO:0006508);; Molecular Function: zinc ion binding (GO:0008270);;	K07764|0|xtr:100487641|adamts4; ADAM metallopeptidase with thrombospondin type 1 motif, 4; K07764 a disintegrin and metalloproteinase with thrombospondin motifs 4 [EC:3.4.24.82] (A)	[O]	Posttranslational modification, protein turnover, chaperones	Reprolysin family propeptide;; Reprolysin (M12B) family zinc metalloprotease;; Metallo-peptidase family M12;; Metallo-peptidase family M12B Reprolysin-like;; Thrombospondin type 1 domain;; Metallo-peptidase family M12B Reprolysin-like;; ADAM-TS Spacer 1;; Metallo-peptidase family M12B Reprolysin-like	Disintegrin (Precursor) OS=Gloydius saxatilis (Rock mamushi) PE=2 SV=1	PREDICTED: A disintegrin and metalloproteinase with thrombospondin motifs 4 isoform X2 [Xenopus (Silurana) tropicalis]
c104963.graph_c0	76	8.55569	10	0.910655	1.22e-13	-3.2755	down	[J]	Translation, ribosomal structure and biogenesis	Molecular Function: translation elongation factor activity (GO:0003746);; Molecular Function: GTPase activity (GO:0003924);; Molecular Function: GTP binding (GO:0005525);; Cellular Component: cytoplasm (GO:0005737);; Biological Process: GTP catabolic process (GO:0006184);; Biological Process: translational elongation (GO:0006414);;	K03231|1.17931e-145|tru:101063194|elongation factor 1-alpha 1-like; K03231 elongation factor 1-alpha (A)	[J]	Translation, ribosomal structure and biogenesis	Elongation factor Tu GTP binding domain;; Elongation factor Tu domain 2	Elongation factor 1-alpha GN=eef1a OS=Oryzias latipes (Medaka fish) PE=2 SV=1	PREDICTED: elongation factor 1-alpha 1-like [Astyanax mexicanus]
c86936.graph_c0	21	6.8691	2	0.529203	0.000674173	-3.32209	down	--	--	--	--	--	--	--	--	unnamed protein product [Oncorhynchus mykiss]
c83717.graph_c0	21	1.34874	2	0.103909	0.000674173	-3.32209	down	--	--	--	--	--	--	--	--	PREDICTED: WD repeat-containing protein 65 [Xenopus (Silurana) tropicalis]
c105726.graph_c0	52	2.42398	6	0.22625	4.83e-10	-3.38473	down	--	--	--	K10410|7.55208e-151|xtr:549441|dnali1, hp28, p28; dynein, axonemal, light intermediate chain 1; K10410 dynein light intermediate chain, axonemal (A)	[Z]	Cytoskeleton	Axonemal dynein light chain	--	dynein, axonemal, light intermediate chain 1 [Xenopus (Silurana) tropicalis]
c113526.graph_c0	52	1.91464	6	0.178709	4.83e-10	-3.38473	down	--	--	--	--	--	--	Tumour suppressor, Mitostatin	--	cilia and flagella associated protein 45 [Xenopus (Silurana) tropicalis]
c109752.graph_c0	22	2.27531	2	0.167324	0.000329718	-3.38698	down	--	--	--	--	--	--	Reverse transcriptase (RNA-dependent DNA polymerase)	--	PREDICTED: uncharacterized protein LOC101730873 [Xenopus (Silurana) tropicalis]
c117363.graph_c0	93	3.91786	11	0.374861	0	-3.43893	down	--	--	--	K16504|0|xtr:100494229|cdhr4; cadherin-related family member 4; K16504 cadherin-related family member 4 (A)	[T]	Signal transduction mechanisms	Cadherin domain	Cadherin-7 (Precursor) GN=CDH7 OS=Gallus gallus (Chicken) PE=2 SV=1	PREDICTED: cadherin-related family member 4 [Xenopus (Silurana) tropicalis]
c85559.graph_c0	23	1.58424	2	0.111439	0.000161097	-3.44908	down	--	--	--	K10798|1.03572e-34|dre:558045|parp4, si:dkey-174k18.1; poly (ADP-ribose) polymerase family, member 4; K10798 poly [ADP-ribose] polymerase [EC:2.4.2.30] (A)	[R]	General function prediction only	--	--	PREDICTED: poly [ADP-ribose] polymerase 4 [Danio rerio]
c103073.graph_c0	24	2.61045	2	0.175973	7.87e-05	-3.50862	down	--	--	--	--	[R]	General function prediction only	Zinc knuckle;; Retroviral aspartyl protease	--	PREDICTED: uncharacterized protein LOC103278318 [Anolis carolinensis]
c104620.graph_c0	33	2.544	3	0.187084	8.48e-07	-3.54402	down	--	--	--	--	--	--	--	--	PREDICTED: uncharacterized protein LOC100537066 [Danio rerio]
c132038.graph_c0	25	1.69227	2	0.109515	3.84e-05	-3.56579	down	[O]	Posttranslational modification, protein turnover, chaperones	--	--	[O]	Posttranslational modification, protein turnover, chaperones	Hsp70 protein;; NAD-specific glutamate dehydrogenase	Stress-70 protein, mitochondrial (Precursor) OS=Gallus gallus (Chicken) PE=1 SV=1	PREDICTED: stress-70 protein, mitochondrial, partial [Chlamydotis macqueenii]
c20313.graph_c0	25	1.45248	2	0.0939963	3.84e-05	-3.56579	down	--	--	--	K08111|1.60676e-24|xtr:100491440|glypican-5-like; K08111 glypican 5 (A)	[T]	Signal transduction mechanisms	Glypican	--	PREDICTED: glypican-5-like isoform X3 [Xenopus (Silurana) tropicalis]
c60029.graph_c0	25	1.61225	2	0.104336	3.84e-05	-3.56579	down	--	--	Molecular Function: sequence-specific DNA binding transcription factor activity (GO:0003700);; Cellular Component: nucleus (GO:0005634);; Biological Process: regulation of transcription, DNA-templated (GO:0006355);; Molecular Function: sequence-specific DNA binding (GO:0043565);; Biological Process: single-organism process (GO:0044699);;	K04502|3.44683e-113|xtr:100038288|fosl1, fra-1; FOS-like antigen 1; K04502 fos-like antigen 1 (A)	[K]	Transcription	bZIP transcription factor;; Basic region leucine zipper;; bZIP Maf transcription factor	Fos-related antigen 2 GN=FOSL2 OS=Gallus gallus (Chicken) PE=1 SV=1	LOC100038288 protein [Xenopus (Silurana) tropicalis]
c74814.graph_c0	18	1.27772	1	0.0574217	0.000959834	-3.68727	down	--	--	--	--	--	--	Domain of unknown function (DUF4561)	--	chromosome 9 open reading frame 9 [Xenopus laevis]
c114038.graph_c0	56	9.17387	5	0.662593	7.29e-12	-3.71181	down	--	--	Biological Process: ovulation from ovarian follicle (GO:0001542);; Biological Process: epithelial cell maturation (GO:0002070);; Molecular Function: steroid hormone receptor activity (GO:0003707);; Molecular Function: ligand-activated sequence-specific DNA binding RNA polymerase II transcription factor activity (GO:0004879);; Molecular Function: receptor binding (GO:0005102);; Molecular Function:…	K08556|0|xla:373633|pgr-a, XPR-1, pgr, xpr-2; progesterone receptor; K08556 progesterone receptor (A)	[T]	Signal transduction mechanisms	Ligand-binding domain of nuclear hormone receptor;; Zinc finger, C4 type (two domains);; Progesterone receptor	Progesterone receptor GN=pgr OS=Rana dybowskii (Dybovsky&apos;s frog) PE=1 SV=1	RecName: Full=Progesterone receptor; Short=PR; AltName: Full=Nuclear receptor subfamily 3 group C member 3; AltName: Full=dyPR [Rana dybowskii]
c126716.graph_c0	19	2.33824	1	0.0995514	0.000450079	-3.76228	down	--	--	--	--	--	--	--	--	PREDICTED: myelin regulatory factor-like protein [Xenopus (Silurana) tropicalis]
c124958.graph_c0	19	2.75423	1	0.117262	0.000450079	-3.76228	down	[J]	Translation, ribosomal structure and biogenesis	Molecular Function: structural constituent of ribosome (GO:0003735);; Cellular Component: ribosome (GO:0005840);; Biological Process: embryo development (GO:0009790);; Biological Process: brain segmentation (GO:0035284);; Biological Process: regulation of erythrocyte differentiation (GO:0045646);; Biological Process: intrinsic apoptotic signaling pathway by p53 class mediator (GO:0072332);;	K02966|2.70474e-21|tca:663562|40S ribosomal protein S19-like; K02966 small subunit ribosomal protein S19e (A)	[J]	Translation, ribosomal structure and biogenesis	Ribosomal protein S19e	40S ribosomal protein S19 GN=rps19 OS=Myxine glutinosa (Atlantic hagfish) PE=2 SV=1	RecName: Full=40S ribosomal protein S19 [Myxine glutinosa]
c104172.graph_c0	4786	86.6787	474	6.94433	0	-3.80912	down	--	--	--	--	[IU]	--	Lipoprotein amino terminal region	--	PREDICTED: microsomal triglyceride transfer protein large subunit [Xenopus (Silurana) tropicalis]
c109721.graph_c0	61	8.57829	5	0.568792	3.06e-13	-3.83366	down	--	--	--	--	--	--	Vitelline membrane outer layer protein I (VOMI)	Vitelline membrane outer layer protein 1 (Precursor) GN=VMO1 OS=Gallus gallus (Chicken) PE=1 SV=1	PREDICTED: vitelline membrane outer layer protein 1 homolog [Meleagris gallopavo]
c105779.graph_c0	21	1.58961	1	0.0612326	9.9e-05	-3.90154	down	[M]	Cell wall/membrane/envelope biogenesis	Cellular Component: integral component of membrane (GO:0016021);; Biological Process: hyaluronan biosynthetic process (GO:0030213);; Molecular Function: hyaluronan synthase activity (GO:0050501);;	K00752|2.38819e-170|xtr:100487554|has3; hyaluronan synthase 3; K00752 hyaluronan synthase [EC:2.4.1.212] (A)	[M]	Cell wall/membrane/envelope biogenesis	Chitin synthase;; Glycosyltransferase like family 2;; Glycosyl transferase family 2	Hyaluronan synthase 2 GN=HAS2 OS=Gallus gallus (Chicken) PE=2 SV=2	PREDICTED: hyaluronan synthase 3 [Xenopus (Silurana) tropicalis]
c96202.graph_c0	8299	246.181	708	16.9893	0	-4.0253	down	--	--	--	--	[I]	Lipid transport and metabolism	Domain of unknown function (DUF1944);; von Willebrand factor type D domain	YGP42 (Precursor) GN=VTG1 OS=Gallus gallus (Chicken) PE=1 SV=1	PREDICTED: vitellogenin-1-like [Chrysemys picta bellii]
c115590.graph_c0	72	8.17434	5	0.4592	3.33e-16	-4.07022	down	--	--	--	--	--	--	Small cytokines (intecrine/chemokine), interleukin-8 like	--	PREDICTED: c-X-C motif chemokine 13-like [Maylandia zebra]
c120415.graph_c1	88	7.21765	6	0.398086	0	-4.13547	down	--	--	--	--	--	--	--	--	PREDICTED: uncharacterized protein LOC101732219 isoform X3 [Xenopus (Silurana) tropicalis]
c122235.graph_c0	43	2.83944	2	0.106833	1.06e-10	-4.33084	down	--	--	--	--	[R]	General function prediction only	Reverse transcriptase (RNA-dependent DNA polymerase)	Transposon TX1 uncharacterized 149 kDa protein OS=Xenopus laevis (African clawed frog) PE=3 SV=1	PREDICTED: uncharacterized protein LOC101734130, partial [Xenopus (Silurana) tropicalis]
c107568.graph_c0	72	1.75627	4	0.0789279	0	-4.33215	down	--	--	--	--	[R]	General function prediction only	Reverse transcriptase (RNA-dependent DNA polymerase);; Reverse transcriptase (RNA-dependent DNA polymerase)	Transposon TX1 uncharacterized 149 kDa protein OS=Xenopus laevis (African clawed frog) PE=3 SV=1	unnamed protein product [Oncorhynchus mykiss]
c100683.graph_c0	30	1.59253	1	0.0429415	1.15e-07	-4.4014	down	--	--	--	--	[R]	General function prediction only	--	--	PREDICTED: RING finger protein unkempt homolog, partial [Python bivittatus]
c109858.graph_c0	48	5.17602	2	0.17446	3.25e-12	-4.48701	down	[G]	Carbohydrate transport and metabolism	--	K09864|9.13258e-21|lcm:102349768|AQP1; aquaporin 1; K09864 aquaporin-1 (A)	[G]	Carbohydrate transport and metabolism	Major intrinsic protein	Aquaporin FA-CHIP GN=AQPA OS=Pelophylax esculentus (Edible frog) PE=2 SV=1	PREDICTED: aquaporin-1 [Latimeria chalumnae]
c128211.graph_c0	16	2.10534	0	0	0.000400403	-4.50801	down	--	--	--	--	--	--	Photosystem I reaction centre subunit VI	--	--
c110150.graph_c0	16	1.71064	0	0	0.000400403	-4.50801	down	[J]	Translation, ribosomal structure and biogenesis	--	--	[J]	Translation, ribosomal structure and biogenesis	Ribosomal protein S17	--	--
c109226.graph_c0	16	3.81969	0	0	0.000400403	-4.50801	down	--	--	--	--	[G]	Carbohydrate transport and metabolism	Major intrinsic protein	--	PREDICTED: aquaporin 1a (Colton blood group), tandem duplicate 2 isoform X1 [Danio rerio]
c21382.graph_c0	16	2.5362	0	0	0.000400403	-4.50801	down	--	--	--	--	[U]	Intracellular trafficking, secretion, and vesicular transport	Signal peptide binding domain	--	--
c96353.graph_c0	16	2.39689	0	0	0.000400403	-4.50801	down	--	--	--	--	[R]	General function prediction only	Ankyrin repeat	--	--
c86277.graph_c0	16	2.62234	0	0	0.000400403	-4.50801	down	[Q]	Secondary metabolites biosynthesis, transport and catabolism	Cellular Component: mitochondrion (GO:0005739);; Molecular Function: 9,10 (9', 10')-carotenoid-cleaving dioxygenase activity (GO:0010437);; Biological Process: negative regulation of oxidative stress-induced intrinsic apoptotic signaling pathway (GO:1902176);;	--	[Q]	Secondary metabolites biosynthesis, transport and catabolism	Retinal pigment epithelial membrane protein	Beta,beta-carotene 15,15&apos;-monooxygenase OS=Gallus gallus (Chicken) PE=1 SV=1	PREDICTED: beta,beta-carotene 9&apos;,10&apos;-oxygenase-like [Larimichthys crocea]
c43450.graph_c0	16	1.44888	0	0	0.000400403	-4.50801	down	--	--	Biological Process: response to biotic stimulus (GO:0009607);; Cellular Component: integral component of membrane (GO:0016021);;	--	--	--	Interferon-induced transmembrane protein	Synapse differentiation-inducing gene protein 1-like GN=syndig1l OS=Danio rerio (Zebrafish) PE=3 SV=1	PREDICTED: synapse differentiation-inducing gene protein 1-like isoform X2 [Xenopus (Silurana) tropicalis]
c100656.graph_c0	16	2.31935	0	0	0.000400403	-4.50801	down	[O]	Posttranslational modification, protein turnover, chaperones	Molecular Function: ATP binding (GO:0005524);; Biological Process: response to stress (GO:0006950);;	K03283|1.10789e-58|mcc:100424244|heat shock cognate 70 kDa protein 2-like; K03283 heat shock 70kDa protein 1/8 (A)	[O]	Posttranslational modification, protein turnover, chaperones	Hsp70 protein	Heat shock cognate 71 kDa protein GN=hsc70 OS=Oryzias latipes (Medaka fish) PE=2 SV=1	PREDICTED: heat shock cognate 71 kDa protein-like [Takifugu rubripes]
c97484.graph_c0	16	2.51082	0	0	0.000400403	-4.50801	down	--	--	--	--	[C]	Energy production and conversion	ATP synthase D chain, mitochondrial (ATP5H)	--	PREDICTED: ATP synthase subunit d, mitochondrial-like [Astyanax mexicanus]
c125380.graph_c0	16	1.64073	0	0	0.000400403	-4.50801	down	--	--	--	K06471|6.46345e-151|hsa:5175|PECAM1, CD31, CD31/EndoCAM, GPIIA', PECA1, PECAM-1, endoCAM; platelet/endothelial cell adhesion molecule 1; K06471 platelet/endothelial cell adhesion molecule (A)	--	--	Immunoglobulin domain;; Immunoglobulin domain;; Immunoglobulin domain;; Immunoglobulin I-set domain	--	Platelet endothelial cell adhesion molecule [Chelonia mydas]
c88212.graph_c0	16	3.14876	0	0	0.000400403	-4.50801	down	--	--	--	--	[P]	Inorganic ion transport and metabolism	Citrate transporter	--	--
c84328.graph_c0	16	2.65705	0	0	0.000400403	-4.50801	down	--	--	--	--	--	--	Translation machinery associated TMA7	--	--
c103486.graph_c0	16	2.32472	0	0	0.000400403	-4.50801	down	[R]	General function prediction only	--	--	[QR]	--	2OG-Fe(II) oxygenase superfamily	--	ACC synthase [Limnodynastes tasmaniensis]
c102914.graph_c0	16	1.54003	0	0	0.000400403	-4.50801	down	--	--	Biological Process: protein polyubiquitination (GO:0000209);; Molecular Function: ubiquitin-protein transferase activity (GO:0004842);; Molecular Function: ATP binding (GO:0005524);; Biological Process: ubiquitin-dependent protein catabolic process (GO:0006511);; Biological Process: positive regulation of protein ubiquitination (GO:0031398);; Molecular Function: mitogen-activated protein kinase k…	K06689|1.624e-86|dre:100001914|ube2d4, zgc:162263; ubiquitin-conjugating enzyme E2D 4 (putative) (EC:6.3.2.19); K06689 ubiquitin-conjugating enzyme E2 D/E [EC:6.3.2.19] (A)	[O]	Posttranslational modification, protein turnover, chaperones	Ubiquitin-conjugating enzyme;; Prokaryotic E2 family B;; RWD domain	Ubiquitin-conjugating enzyme E2 D4 {ECO:0000250|UniProtKB:Q9Y2X8} GN=ube2d4 OS=Xenopus laevis (African clawed frog) PE=1 SV=1	Chain A, Structure Of The Ubch5 :chip U-Box Complex
c102351.graph_c0	16	2.47369	0	0	0.000400403	-4.50801	down	[O]	Posttranslational modification, protein turnover, chaperones	--	--	[O]	Posttranslational modification, protein turnover, chaperones	C-terminal, D2-small domain, of ClpB protein	--	PREDICTED: chaperone protein ClpB-like, partial [Taeniopygia guttata]
c20923.graph_c0	16	2.88627	0	0	0.000400403	-4.50801	down	--	--	--	--	[O]	Posttranslational modification, protein turnover, chaperones	--	--	--
c31859.graph_c0	16	1.60916	0	0	0.000400403	-4.50801	down	[M]	Cell wall/membrane/envelope biogenesis	--	--	--	--	Phosphoesterase family	--	--
c95875.graph_c0	16	2.77457	0	0	0.000400403	-4.50801	down	--	--	--	--	[O]	Posttranslational modification, protein turnover, chaperones	--	--	--
c80470.graph_c0	16	2.39689	0	0	0.000400403	-4.50801	down	--	--	--	--	[R]	General function prediction only	--	--	--
c131180.graph_c0	16	2.14585	0	0	0.000400403	-4.50801	down	--	--	--	--	--	--	Chlorophyll A-B binding protein	--	--
c63173.graph_c0	16	1.76789	0	0	0.000400403	-4.50801	down	[O]	Posttranslational modification, protein turnover, chaperones	--	K07305|1.93229e-46|bacu:103016149|MSRB3; methionine sulfoxide reductase B3; K07305 peptide-methionine (R)-S-oxide reductase [EC:1.8.4.12] (A)	[O]	Posttranslational modification, protein turnover, chaperones	SelR domain	Methionine-R-sulfoxide reductase B2, mitochondrial (Precursor) GN=msrb2 OS=Danio rerio (Zebrafish) PE=2 SV=1	PREDICTED: methionine-R-sulfoxide reductase B3 isoform X2 [Meleagris gallopavo]
c72589.graph_c0	16	1.668	0	0	0.000400403	-4.50801	down	--	--	--	--	--	--	Sulfite exporter TauE/SafE	--	--
c88132.graph_c0	16	2.27731	0	0	0.000400403	-4.50801	down	[O]	Posttranslational modification, protein turnover, chaperones	--	--	[C]	Energy production and conversion	--	--	--
c106086.graph_c0	17	2.54366	0	0	0.000177621	-4.59174	down	--	--	--	--	--	--	linker histone H1 and H5 family	--	--
c80086.graph_c0	17	1.87838	0	0	0.000177621	-4.59174	down	--	--	--	--	--	--	Late embryogenesis abundant protein	--	--
c127053.graph_c0	17	2.22758	0	0	0.000177621	-4.59174	down	--	--	--	--	[P]	Inorganic ion transport and metabolism	Citrate transporter	--	--
c45046.graph_c0	17	1.64893	0	0	0.000177621	-4.59174	down	[C]	Energy production and conversion	--	--	[O]	Posttranslational modification, protein turnover, chaperones	4Fe-4S single cluster domain;; 4Fe-4S single cluster domain	--	--
c88131.graph_c0	17	2.26063	0	0	0.000177621	-4.59174	down	--	--	--	--	[R]	General function prediction only	--	--	--
c57113.graph_c0	17	1.43583	0	0	0.000177621	-4.59174	down	--	--	--	--	--	--	Protein of unknown function (DUF3529)	--	--
c78962.graph_c0	17	3.70597	0	0	0.000177621	-4.59174	down	--	--	--	--	--	--	Chlorophyll A-B binding protein	--	--
c96997.graph_c0	17	2.75031	0	0	0.000177621	-4.59174	down	[R]	General function prediction only	--	--	[R]	General function prediction only	Alpha/beta hydrolase family;; alpha/beta hydrolase fold	--	--
c105144.graph_c0	17	1.68542	0	0	0.000177621	-4.59174	down	--	--	--	--	--	--	Photosystem II Pbs27	--	--
c132609.graph_c0	17	1.49205	0	0	0.000177621	-4.59174	down	[C]	Energy production and conversion	Molecular Function: binding (GO:0005488);; Biological Process: transport (GO:0006810);; Molecular Function: oxidoreductase activity (GO:0016491);;	K00411|4.84754e-08|hro:HELRODRAFT_77345|hypothetical protein; K00411 ubiquinol-cytochrome c reductase iron-sulfur subunit [EC:1.10.2.2] (A)	[C]	Energy production and conversion	Cytochrome B6-F complex Fe-S subunit;; Rieske [2Fe-2S] domain	Cytochrome b-c1 complex subunit Rieske, mitochondrial (Precursor) GN=UQCRFS1 OS=Gallus gallus (Chicken) PE=1 SV=1	PREDICTED: cytochrome b-c1 complex subunit Rieske, mitochondrial-like, partial [Pundamilia nyererei]
c137583.graph_c0	17	1.38907	0	0	0.000177621	-4.59174	down	[R]	General function prediction only	--	K05687|1.77043e-33|phu:Phum_PHUM336660|protein DJ-1, putative; K05687 protein DJ-1 (A)	[RV]	--	DJ-1/PfpI family;; Putative amidotransferase	Protein DJ-1 (Precursor) GN=PARK7 OS=Gallus gallus (Chicken) PE=2 SV=1	PREDICTED: protein DJ-1 isoform X1 [Latimeria chalumnae]
c22436.graph_c0	17	1.73195	0	0	0.000177621	-4.59174	down	--	--	--	--	--	--	Dormancy/auxin associated protein	--	--
c91452.graph_c0	17	1.90864	0	0	0.000177621	-4.59174	down	--	--	--	--	--	--	Ribosomal protein L34	--	--
c90278.graph_c0	17	2.69471	0	0	0.000177621	-4.59174	down	--	--	--	--	--	--	Probable lipid transfer	--	--
c23664.graph_c0	17	2.23224	0	0	0.000177621	-4.59174	down	--	--	--	--	--	--	Chlorophyll A-B binding protein	--	--
c80605.graph_c0	18	1.45	0	0	7.9e-05	-4.67087	down	[C]	Energy production and conversion	--	K00128|2.60677e-34|hro:HELRODRAFT_194011|hypothetical protein; K00128 aldehyde dehydrogenase (NAD+) [EC:1.2.1.3] (A)	[C]	Energy production and conversion	Aldehyde dehydrogenase family	Retinal dehydrogenase 2 GN=ALDH1A2 OS=Gallus gallus (Chicken) PE=2 SV=2	PREDICTED: retinal dehydrogenase 2-like [Nipponia nippon]
c66843.graph_c0	18	1.20672	0	0	7.9e-05	-4.67087	down	--	--	--	--	[R]	General function prediction only	--	--	--
c95700.graph_c0	18	2.03182	0	0	7.9e-05	-4.67087	down	--	--	--	--	--	--	Plastid and cyanobacterial ribosomal protein (PSRP-3 / Ycf65)	--	--
c75343.graph_c0	18	1.72723	0	0	7.9e-05	-4.67087	down	[MG]	--	--	--	[G]	Carbohydrate transport and metabolism	Complex I intermediate-associated protein 30 (CIA30);; NADH(P)-binding	--	--
c24861.graph_c0	18	2.0137	0	0	7.9e-05	-4.67087	down	--	--	--	--	[R]	General function prediction only	Casein kinase substrate phosphoprotein PP28	--	PREDICTED: 28 kDa heat- and acid-stable phosphoprotein-like [Cynoglossus semilaevis]
c80311.graph_c0	18	2.11954	0	0	7.9e-05	-4.67087	down	[J]	Translation, ribosomal structure and biogenesis	Molecular Function: structural constituent of ribosome (GO:0003735);; Biological Process: rRNA processing (GO:0006364);; Biological Process: translation (GO:0006412);; Cellular Component: cytosolic small ribosomal subunit (GO:0022627);; Biological Process: ribosomal small subunit biogenesis (GO:0042274);;	K02991|5.86146e-69|loa:LOAG_02331|40S ribosomal protein S6; K02991 small subunit ribosomal protein S6e (A)	[J]	Translation, ribosomal structure and biogenesis	Ribosomal protein S6e	40S ribosomal protein S6 GN=RPS6 OS=Gallus gallus (Chicken) PE=2 SV=1	40S ribosomal protein S6 [Xenopus (Silurana) tropicalis]
c123548.graph_c0	18	5.04608	0	0	7.9e-05	-4.67087	down	[G]	Carbohydrate transport and metabolism	Biological Process: somitogenesis (GO:0001756);; Biological Process: thigmotaxis (GO:0001966);; Biological Process: axonogenesis (GO:0007409);; Biological Process: brain development (GO:0007420);; Molecular Function: lyase activity (GO:0016829);; Biological Process: pigmentation (GO:0043473);;	K01623|9.1284e-34|dre:336425|aldoaa, aldoa, cb79, sb:cb79, wu:fa28b10, wu:fb10b11; aldolase a, fructose-bisphosphate, a (EC:4.1.2.13); K01623 fructose-bisphosphate aldolase, class I [EC:4.1.2.13] (A)	[G]	Carbohydrate transport and metabolism	Fructose-bisphosphate aldolase class-I	Fructose-bisphosphate aldolase A {ECO:0000303|PubMed:23786287} OS=Salmo salar (Atlantic salmon) PE=1 SV=1	Fructose-bisphosphate aldolase, muscle type [Salmo salar]
c58835.graph_c0	18	2.85322	0	0	7.9e-05	-4.67087	down	[T]	Signal transduction mechanisms	Biological Process: G2/M transition of mitotic cell cycle (GO:0000086);; Biological Process: neuron migration (GO:0001764);; Biological Process: regulation of heart rate by hormone (GO:0003064);; Molecular Function: monooxygenase activity (GO:0004497);; Cellular Component: mitochondrion (GO:0005739);; Cellular Component: cytosol (GO:0005829);; Cellular Component: kinesin complex (GO:0005871);; Bi…	K06630|1.61967e-44|isc:IscW_ISCW011376|multifunctional chaperone, putative; K06630 14-3-3 protein epsilon (A)	[O]	Posttranslational modification, protein turnover, chaperones	14-3-3 protein	14-3-3 protein epsilon OS=Gallus gallus (Chicken) PE=1 SV=1	PREDICTED: 14-3-3 protein epsilon isoform X2 [Callorhinchus milii]
c102216.graph_c0	18	2.21953	0	0	7.9e-05	-4.67087	down	[G]	Carbohydrate transport and metabolism	Biological Process: microtubule cytoskeleton organization (GO:0000226);; Biological Process: nuclear membrane fusion (GO:0000740);; Molecular Function: glyceraldehyde-3-phosphate dehydrogenase (NAD+) (phosphorylating) activity (GO:0004365);; Cellular Component: nucleus (GO:0005634);; Cellular Component: cytosol (GO:0005829);; Biological Process: gluconeogenesis (GO:0006094);; Biological Process: …	K00134|2.2315e-67|pss:102462433|GAPDH, PsGAPDH; glyceraldehyde-3-phosphate dehydrogenase (EC:1.2.1.12); K00134 glyceraldehyde 3-phosphate dehydrogenase [EC:1.2.1.12] (A)	[G]	Carbohydrate transport and metabolism	Glyceraldehyde 3-phosphate dehydrogenase, C-terminal domain	Glyceraldehyde-3-phosphate dehydrogenase GN=GAPDH OS=Pelodiscus sinensis (Chinese softshell turtle) PE=2 SV=1	PREDICTED: glyceraldehyde-3-phosphate dehydrogenase [Poecilia formosa]
c98730.graph_c0	18	1.54949	0	0	7.9e-05	-4.67087	down	[C]	Energy production and conversion	--	--	[C]	Energy production and conversion	Aldo/keto reductase family	--	PREDICTED: uncharacterized oxidoreductase At1g06690, chloroplastic-like [Xiphophorus maculatus]
c94556.graph_c0	18	1.92447	0	0	7.9e-05	-4.67087	down	[LR]	--	--	--	[T]	Signal transduction mechanisms	NUDIX domain	--	--
c96389.graph_c0	18	2.89343	0	0	7.9e-05	-4.67087	down	[ER]	--	--	K00008|1.71941e-43|dmo:Dmoj_GI22938|GI22938 gene product from transcript GI22938-RA; K00008 L-iditol 2-dehydrogenase [EC:1.1.1.14] (A)	[Q]	Secondary metabolites biosynthesis, transport and catabolism	Alcohol dehydrogenase GroES-like domain	Sorbitol dehydrogenase GN=SORD OS=Gallus gallus (Chicken) PE=1 SV=1	PREDICTED: sorbitol dehydrogenase-like, partial [Eurypyga helias]
c83208.graph_c0	18	1.42081	0	0	7.9e-05	-4.67087	down	[R]	General function prediction only	--	--	[R]	General function prediction only	Haloacid dehalogenase-like hydrolase;; haloacid dehalogenase-like hydrolase;; HAD-hyrolase-like	Haloacid dehalogenase-like hydrolase domain-containing protein 3 GN=hdhd3 OS=Danio rerio (Zebrafish) PE=2 SV=1	PREDICTED: haloacid dehalogenase-like hydrolase domain-containing protein 3 [Pelodiscus sinensis]
c70864.graph_c0	18	4.07258	0	0	7.9e-05	-4.67087	down	[P]	Inorganic ion transport and metabolism	--	K07213|1.15903e-15|hmg:100215319|copper transport protein ATOX1 homolog; K07213 copper chaperone (A)	[P]	Inorganic ion transport and metabolism	Heavy-metal-associated domain	--	PREDICTED: copper transport protein ATOX1-like [Lepisosteus oculatus]
c58039.graph_c0	19	2.65609	0	0	3.53e-05	-4.74589	down	--	--	--	--	--	--	Thylakoid formation protein	--	--
c89486.graph_c0	19	2.11802	0	0	3.53e-05	-4.74589	down	[I]	Lipid transport and metabolism	--	--	[I]	Lipid transport and metabolism	Squalene/phytoene synthase	--	--
c85606.graph_c0	19	1.95156	0	0	3.53e-05	-4.74589	down	[U]	Intracellular trafficking, secretion, and vesicular transport	--	--	--	--	mttA/Hcf106 family	--	--
c44511.graph_c0	19	2.09567	0	0	3.53e-05	-4.74589	down	[I]	Lipid transport and metabolism	--	--	[R]	General function prediction only	NAD-binding of NADP-dependent 3-hydroxyisobutyrate dehydrogenase;; NAD binding domain of 6-phosphogluconate dehydrogenase	Putative oxidoreductase GLYR1 GN=GLYR1 OS=Gallus gallus (Chicken) PE=2 SV=1	Putative oxidoreductase GLYR1, partial [Cathartes aura]
c89940.graph_c0	19	1.53253	0	0	3.53e-05	-4.74589	down	[R]	General function prediction only	Molecular Function: binding (GO:0005488);;	K13126|1.36909e-17|cin:100176427|polyadenylate-binding protein 4-like; K13126 polyadenylate-binding protein (A)	[R]	General function prediction only	RNA recognition motif. (a.k.a. RRM, RBD, or RNP domain);; RNA recognition motif (a.k.a. RRM, RBD, or RNP domain);; RNA recognition motif. (a.k.a. RRM, RBD, or RNP domain)	Embryonic polyadenylate-binding protein OS=Xenopus tropicalis (Western clawed frog) PE=2 SV=1	PREDICTED: RNA binding motif protein 4 like isoform X1 [Danio rerio]
c92278.graph_c0	19	1.34871	0	0	3.53e-05	-4.74589	down	[O]	Posttranslational modification, protein turnover, chaperones	--	--	[O]	Posttranslational modification, protein turnover, chaperones	Hsp70 protein;; StbA protein	Stress-70 protein, mitochondrial (Precursor) OS=Gallus gallus (Chicken) PE=1 SV=1	PREDICTED: stress-70 protein, mitochondrial-like [Latimeria chalumnae]
c100469.graph_c0	19	2.28009	0	0	3.53e-05	-4.74589	down	[R]	General function prediction only	--	--	--	--	Tetratricopeptide repeat;; TPR repeat;; Tetratricopeptide repeat;; Tetratricopeptide repeat;; Tetratricopeptide repeat;; Tetratricopeptide repeat;; Tetratricopeptide repeat;; Tetratricopeptide repeat;; Tetratricopeptide repeat;; Tetratricopeptide repeat;; Tetratricopeptide repeat;; Tetratricopeptide repeat;; Tetratricopeptide repeat	--	unnamed protein product, partial [Tetraodon nigroviridis]
c109179.graph_c0	19	1.90477	0	0	3.53e-05	-4.74589	down	--	--	--	--	--	--	PsbP	--	--
c86284.graph_c0	19	3.11403	0	0	3.53e-05	-4.74589	down	--	--	--	--	[O]	Posttranslational modification, protein turnover, chaperones	--	--	--
c87641.graph_c0	19	2.2415	0	0	3.53e-05	-4.74589	down	[H]	Coenzyme transport and metabolism	--	--	--	--	Domain of unknown function (DUF3479)	--	--
c77744.graph_c0	19	2.34745	0	0	3.53e-05	-4.74589	down	[J]	Translation, ribosomal structure and biogenesis	--	--	[J]	Translation, ribosomal structure and biogenesis	Elongation factor TS;; UBA/TS-N domain	Elongation factor Ts, mitochondrial {ECO:0000255|HAMAP-Rule:MF_03135} (Precursor) GN=tsfm OS=Danio rerio (Zebrafish) PE=2 SV=1	elongation factor Ts, mitochondrial [Danio rerio]
c102044.graph_c0	20	2.17915	0	0	1.58e-05	-4.8172	down	[E]	Amino acid transport and metabolism	--	--	--	--	Pyridoxal-dependent decarboxylase, C-terminal sheet domain	--	--
c19628.graph_c0	20	1.77774	0	0	1.58e-05	-4.8172	down	[P]	Inorganic ion transport and metabolism	Molecular Function: binding (GO:0005488);; Biological Process: single-organism cellular process (GO:0044763);; Biological Process: biological regulation (GO:0065007);;	--	[P]	Inorganic ion transport and metabolism	E1-E2 ATPase	Sarcoplasmic/endoplasmic reticulum calcium ATPase 3 GN=ATP2A3 OS=Gallus gallus (Chicken) PE=2 SV=1	PREDICTED: calcium-transporting ATPase type 2C member 1 isoform X2 [Meleagris gallopavo]
c95774.graph_c0	20	2.60436	0	0	1.58e-05	-4.8172	down	--	--	--	--	--	--	NADH-ubiquinone reductase complex 1 MLRQ subunit	--	--
c104159.graph_c0	20	3.11515	0	0	1.58e-05	-4.8172	down	--	--	--	--	--	--	Photosystem I reaction centre subunit III	--	--
c100038.graph_c0	20	2.22554	0	0	1.58e-05	-4.8172	down	[OC]	--	Biological Process: cellular metabolic process (GO:0044237);; Biological Process: single-organism cellular process (GO:0044763);; Biological Process: regulation of cellular process (GO:0050794);; Biological Process: oxidation-reduction process (GO:0055114);; Biological Process: organic substance metabolic process (GO:0071704);;	--	[O]	Posttranslational modification, protein turnover, chaperones	Thioredoxin;; Thioredoxin-like domain;; Thioredoxin-like;; Thioredoxin-like;; Thioredoxin;; AhpC/TSA family	Thioredoxin GN=TXN OS=Ophiophagus hannah (King cobra) PE=3 SV=3	thioredoxin [Epinephelus coioides]
c75173.graph_c0	20	2.56706	0	0	1.58e-05	-4.8172	down	[H]	Coenzyme transport and metabolism	--	--	--	--	--	--	--
c87543.graph_c0	20	2.73792	0	0	1.58e-05	-4.8172	down	--	--	--	--	--	--	Late embryogenesis abundant protein	--	--
c95881.graph_c0	20	2.22949	0	0	1.58e-05	-4.8172	down	--	--	--	--	--	--	Stress up-regulated Nod 19	--	--
c107492.graph_c0	20	1.8033	0	0	1.58e-05	-4.8172	down	--	--	--	--	--	--	PAP_fibrillin	--	--
c100330.graph_c0	20	2.36392	0	0	1.58e-05	-4.8172	down	[O]	Posttranslational modification, protein turnover, chaperones	--	K04078|1.73027e-14|tca:664068|10 kDa heat shock protein, mitochondrial; K04078 chaperonin GroES (A)	[O]	Posttranslational modification, protein turnover, chaperones	Chaperonin 10 Kd subunit	10 kDa heat shock protein, mitochondrial GN=hspe1 OS=Oryzias latipes (Medaka fish) PE=3 SV=1	PREDICTED: 10 kDa heat shock protein, mitochondrial isoform X2 [Esox lucius]
c87703.graph_c0	20	2.9538	0	0	1.58e-05	-4.8172	down	[H]	Coenzyme transport and metabolism	--	K06215|1.16838e-59|aqu:100635319|probable pyridoxine biosynthesis SNZERR-like; K06215 pyridoxal 5'-phosphate synthase pdxS subunit [EC:4.3.3.6] (A)	[H]	Coenzyme transport and metabolism	SOR/SNZ family	--	--
c99407.graph_c0	20	2.65394	0	0	1.58e-05	-4.8172	down	--	--	--	--	[R]	General function prediction only	Protein kinase domain	Ribosomal protein S6 kinase alpha-5 GN=RPS6KA5 OS=Gallus gallus (Chicken) PE=2 SV=1	--
c75271.graph_c0	20	1.80071	0	0	1.58e-05	-4.8172	down	[O]	Posttranslational modification, protein turnover, chaperones	--	--	[O]	Posttranslational modification, protein turnover, chaperones	Glutathione S-transferase, C-terminal domain;; Glutathione S-transferase, N-terminal domain;; Glutathione S-transferase, N-terminal domain;; Glutathione S-transferase, C-terminal domain;; Glutathione S-transferase, N-terminal domain	Glutathione S-transferase A OS=Pleuronectes platessa (European plaice) PE=2 SV=1	unnamed protein product [Oncorhynchus mykiss]
c98692.graph_c0	20	2.24144	0	0	1.58e-05	-4.8172	down	[J]	Translation, ribosomal structure and biogenesis	Molecular Function: structural constituent of ribosome (GO:0003735);; Biological Process: translation (GO:0006412);; Cellular Component: large ribosomal subunit (GO:0015934);;	K02880|2.32241e-74|hmg:100199322|60S ribosomal protein L17-like; K02880 large subunit ribosomal protein L17e (A)	[J]	Translation, ribosomal structure and biogenesis	Ribosomal protein L22p/L17e	--	ribosomal protein L17 [Xenopus (Silurana) tropicalis]
c78181.graph_c0	82	2.44865	3	0.0724681	0	-4.83826	down	--	--	Cellular Component: collagen type IX trimer (GO:0005594);; Biological Process: male gonad development (GO:0008584);; Biological Process: female gonad development (GO:0008585);;	K08131|2.48737e-88|xla:446508|col9a3; collagen, type IX, alpha 3; K08131 collagen, type IX, alpha (A)	[W]	Extracellular structures	Collagen triple helix repeat (20 copies)	Collagen alpha-3(IX) chain (Precursor) GN=COL9A3 OS=Gallus gallus (Chicken) PE=2 SV=1	collagen, type IX, alpha 3 precursor [Xenopus laevis]
c52623.graph_c0	21	2.80444	0	0	7.08e-06	-4.88515	down	[GEPR]	--	Molecular Function: substrate-specific transmembrane transporter activity (GO:0022891);;	K08150|7.92765e-07|xtr:100485871|slc2a13; solute carrier family 2 (facilitated glucose transporter), member 13; K08150 MFS transporter, SP family, solute carrier family 2 (myo-inositol transporter), member 13 (A)	[R]	General function prediction only	Sugar (and other) transporter	--	PREDICTED: proton myo-inositol cotransporter isoform X1 [Danio rerio]
c96609.graph_c0	21	3.33719	0	0	7.08e-06	-4.88515	down	--	--	--	--	--	--	CAAD domains of cyanobacterial aminoacyl-tRNA synthetase	--	--
c95276.graph_c0	21	2.32855	0	0	7.08e-06	-4.88515	down	--	--	--	--	[P]	Inorganic ion transport and metabolism	Citrate transporter;; Bacterial Na+/H+ antiporter B (NhaB)	--	--
c104368.graph_c0	21	2.20021	0	0	7.08e-06	-4.88515	down	[C]	Energy production and conversion	--	--	--	--	Ferredoxin thioredoxin reductase catalytic beta chain	--	--
c103508.graph_c0	21	2.39633	0	0	7.08e-06	-4.88515	down	--	--	--	--	[O]	Posttranslational modification, protein turnover, chaperones	FKBP-type peptidyl-prolyl cis-trans isomerase	--	--
c35577.graph_c0	21	1.99376	0	0	7.08e-06	-4.88515	down	--	--	--	--	--	--	FHA domain	--	--
c84909.graph_c0	21	2.21129	0	0	7.08e-06	-4.88515	down	--	--	--	K14709|2.31326e-06|hro:HELRODRAFT_94735|hypothetical protein; K14709 solute carrier family 39 (zinc transporter), member 1/2/3 (A)	[P]	Inorganic ion transport and metabolism	ZIP Zinc transporter	--	--
c96138.graph_c0	21	2.1712	0	0	7.08e-06	-4.88515	down	[C]	Energy production and conversion	--	--	--	--	FAD binding domain;; Pyridine nucleotide-disulphide oxidoreductase;; Glucose inhibited division protein A	--	--
c95621.graph_c0	21	2.136	0	0	7.08e-06	-4.88515	down	[S]	Function unknown	--	--	--	--	ATP-dependent Clp protease adaptor protein ClpS	--	--
c91720.graph_c0	21	1.94375	0	0	7.08e-06	-4.88515	down	--	--	--	K06127|5.36401e-08|oaa:100089054|COQ5; coenzyme Q5 homolog, methyltransferase (S. cerevisiae); K06127 2-methoxy-6-polyprenyl-1,4-benzoquinol methylase [EC:2.1.1.201] (A)	[H]	Coenzyme transport and metabolism	Methyltransferase domain;; ubiE/COQ5 methyltransferase family;; Methyltransferase domain;; Methyltransferase domain	2-methoxy-6-polyprenyl-1,4-benzoquinol methylase, mitochondrial (Precursor) GN=coq5 OS=Xenopus laevis (African clawed frog) PE=2 SV=1	PREDICTED: 2-methoxy-6-polyprenyl-1,4-benzoquinol methylase, mitochondrial-like [Python bivittatus]
c96702.graph_c0	21	2.20759	0	0	7.08e-06	-4.88515	down	[OU]	--	Molecular Function: peptidase activity (GO:0008233);;	--	[O]	Posttranslational modification, protein turnover, chaperones	Clp protease	--	PREDICTED: ATP-dependent Clp protease proteolytic subunit, mitochondrial [Larimichthys crocea]
c88956.graph_c0	22	2.0824	0	0	3.19e-06	-4.95005	down	--	--	--	--	[K]	Transcription	CCT motif	--	--
c111670.graph_c0	22	2.87674	0	0	3.19e-06	-4.95005	down	--	--	--	K09866|1.24074e-15|ola:101156496|aquaporin-4-like (A)	[G]	Carbohydrate transport and metabolism	Major intrinsic protein	Lens fiber major intrinsic protein OS=Lithobates pipiens (Northern leopard frog) PE=1 SV=1	PREDICTED: aquaporin-4-like [Oryzias latipes]
c90201.graph_c0	22	2.70743	0	0	3.19e-06	-4.95005	down	[R]	General function prediction only	--	--	--	--	CBS domain	--	--
c95555.graph_c0	22	2.17769	0	0	3.19e-06	-4.95005	down	--	--	--	--	[K]	Transcription	--	--	--
c100455.graph_c0	22	2.06371	0	0	3.19e-06	-4.95005	down	[P]	Inorganic ion transport and metabolism	Molecular Function: superoxide dismutase activity (GO:0004784);; Molecular Function: copper ion binding (GO:0005507);; Cellular Component: nucleus (GO:0005634);; Cellular Component: mitochondrion (GO:0005739);; Cellular Component: cytosol (GO:0005829);; Molecular Function: zinc ion binding (GO:0008270);; Biological Process: response to xenobiotic stimulus (GO:0009410);; Biological Process: respon…	K04565|1.93782e-51|lcm:102353298|SOD1; superoxide dismutase 1, soluble; K04565 superoxide dismutase, Cu-Zn family [EC:1.15.1.1] (A)	[P]	Inorganic ion transport and metabolism	Copper/zinc superoxide dismutase (SODC)	Superoxide dismutase [Cu-Zn] {ECO:0000250|UniProtKB:P00441} GN=sod1 OS=Xenopus tropicalis (Western clawed frog) PE=2 SV=1	copper/zinc superoxide dismutase [Mauremys reevesii]
c103270.graph_c0	22	1.56876	0	0	3.19e-06	-4.95005	down	--	--	--	--	--	--	Rhodanese-like domain	--	--
c99075.graph_c0	22	2.46559	0	0	3.19e-06	-4.95005	down	[E]	Amino acid transport and metabolism	--	--	[E]	Amino acid transport and metabolism	Glutamine amidotransferases class-II	--	--
c99889.graph_c0	22	3.15997	0	0	3.19e-06	-4.95005	down	[OU]	--	Molecular Function: serine-type endopeptidase activity (GO:0004252);; Biological Process: proteolysis (GO:0006508);;	--	[O]	Posttranslational modification, protein turnover, chaperones	Clp protease	--	unnamed protein product [Oncorhynchus mykiss]
c105717.graph_c0	22	2.03631	0	0	3.19e-06	-4.95005	down	[J]	Translation, ribosomal structure and biogenesis	--	--	[J]	Translation, ribosomal structure and biogenesis	Ribosomal protein L4/L1 family	39S ribosomal protein L4, mitochondrial GN=mrpl4 OS=Danio rerio (Zebrafish) PE=2 SV=1	PREDICTED: 39S ribosomal protein L4, mitochondrial [Chrysemys picta bellii]
c89418.graph_c0	22	2.82956	0	0	3.19e-06	-4.95005	down	[O]	Posttranslational modification, protein turnover, chaperones	Molecular Function: nucleotide binding (GO:0000166);; Biological Process: hemopoiesis (GO:0030097);; Biological Process: fin regeneration (GO:0031101);;	--	[O]	Posttranslational modification, protein turnover, chaperones	Hsp70 protein;; NAD-specific glutamate dehydrogenase	Stress-70 protein, mitochondrial (Precursor) OS=Gallus gallus (Chicken) PE=1 SV=1	PREDICTED: stress-70 protein, mitochondrial isoform X2 [Ficedula albicollis]
c72281.graph_c0	22	2.18458	0	0	3.19e-06	-4.95005	down	[J]	Translation, ribosomal structure and biogenesis	--	--	[O]	Posttranslational modification, protein turnover, chaperones	Ribosomal L18p/L5e family	--	--
c64878.graph_c0	22	3.20392	0	0	3.19e-06	-4.95005	down	--	--	--	--	[M]	Cell wall/membrane/envelope biogenesis	Sucrose-6F-phosphate phosphohydrolase	--	--
c103636.graph_c0	22	3.41817	0	0	3.19e-06	-4.95005	down	[J]	Translation, ribosomal structure and biogenesis	Molecular Function: structural constituent of ribosome (GO:0003735);; Biological Process: negative regulation of translation (GO:0017148);; Cellular Component: cytosolic large ribosomal subunit (GO:0022625);; Biological Process: cellular response to interferon-gamma (GO:0071346);; Biological Process: negative regulation of formation of translation preinitiation complex (GO:1901194);;	K02872|8.91093e-62|nve:NEMVE_v1g188032|hypothetical protein; K02872 large subunit ribosomal protein L13Ae (A)	[J]	Translation, ribosomal structure and biogenesis	Ribosomal protein L13	60S ribosomal protein L13a (Fragment) GN=rpl13a OS=Salmo trutta (Brown trout) PE=2 SV=1	60S ribosomal protein l13a [Ictalurus punctatus]
c94313.graph_c0	22	2.35614	0	0	3.19e-06	-4.95005	down	[IM]	--	--	--	--	--	LytB protein	--	--
c117447.graph_c0	89	8.86865	3	0.241825	0	-4.95544	down	--	--	--	--	--	--	--	--	PREDICTED: uncharacterized protein LOC100487960 isoform X1 [Xenopus (Silurana) tropicalis]
c81801.graph_c0	23	3.02643	0	0	1.44e-06	-5.01215	down	--	--	--	--	--	--	Nicotianamine synthase protein	--	--
c77101.graph_c0	23	2.2875	0	0	1.44e-06	-5.01215	down	[QR]	--	--	--	--	--	Thiopurine S-methyltransferase (TPMT);; Methyltransferase domain;; Methyltransferase domain;; Methyltransferase domain;; Methyltransferase domain;; Methyltransferase domain;; Methyltransferase domain;; Methyltransferase domain	--	--
c96001.graph_c0	23	2.1705	0	0	1.44e-06	-5.01215	down	[J]	Translation, ribosomal structure and biogenesis	Cellular Component: intracellular (GO:0005622);;	--	[J]	Translation, ribosomal structure and biogenesis	Ribosomal protein S10p/S20e	40S ribosomal protein S20 GN=rps20 OS=Xenopus laevis (African clawed frog) PE=1 SV=1	PREDICTED: 40S ribosomal protein S20 [Calypte anna]
c100674.graph_c0	23	2.41379	0	0	1.44e-06	-5.01215	down	--	--	--	--	--	--	Allinase;; Alliinase EGF-like domain	--	--
c96710.graph_c0	23	2.29113	0	0	1.44e-06	-5.01215	down	--	--	--	--	[J]	Translation, ribosomal structure and biogenesis	--	--	--
c106404.graph_c0	23	3.1762	0	0	1.44e-06	-5.01215	down	--	--	Cellular Component: intracellular organelle (GO:0043229);;	K05765|6.83895e-28|mde:101896929|cofilin/actin-depolymerizing factor homolog; K05765 cofilin (A)	[Z]	Cytoskeleton	Cofilin/tropomyosin-type actin-binding protein	Cofilin-2 GN=CFL2 OS=Gallus gallus (Chicken) PE=1 SV=2	PREDICTED: cofilin-1 [Chrysemys picta bellii]
c103696.graph_c0	23	2.09487	0	0	1.44e-06	-5.01215	down	[O]	Posttranslational modification, protein turnover, chaperones	--	--	[O]	Posttranslational modification, protein turnover, chaperones	FKBP-type peptidyl-prolyl cis-trans isomerase	Peptidyl-prolyl cis-trans isomerase FKBP1A GN=fkbp1a OS=Xenopus laevis (African clawed frog) PE=3 SV=3	PREDICTED: peptidyl-prolyl cis-trans isomerase FKBP1A-like [Cynoglossus semilaevis]
c64200.graph_c0	23	2.7083	0	0	1.44e-06	-5.01215	down	[J]	Translation, ribosomal structure and biogenesis	Cellular Component: intracellular part (GO:0044424);;	--	[J]	Translation, ribosomal structure and biogenesis	Ribosomal protein L13	--	39S ribosomal protein L13, mitochondrial [Anoplopoma fimbria]
c102808.graph_c0	23	4.03304	0	0	1.44e-06	-5.01215	down	--	--	--	K16295|1.8533e-14|lcm:102352080|cytochrome b ascorbate-dependent protein 3-like; K16295 cytochrome b ascorbate-dependent protein 3 [EC:1.16.5.1] (A)	[C]	Energy production and conversion	Eukaryotic cytochrome b561	Cytochrome b ascorbate-dependent protein 3 GN=cyb561a3 OS=Danio rerio (Zebrafish) PE=2 SV=1	PREDICTED: cytochrome b ascorbate-dependent protein 3-like isoform X1 [Latimeria chalumnae]
c66175.graph_c0	23	1.98809	0	0	1.44e-06	-5.01215	down	--	--	--	--	[G]	Carbohydrate transport and metabolism	Major Facilitator Superfamily	--	--
c78516.graph_c0	23	6.01751	0	0	1.44e-06	-5.01215	down	[J]	Translation, ribosomal structure and biogenesis	--	--	[J]	Translation, ribosomal structure and biogenesis	Elongation factor Tu GTP binding domain	Elongation factor Tu, mitochondrial (Precursor; Fragment) OS=Gallus gallus (Chicken) PE=1 SV=1	PREDICTED: LOW QUALITY PROTEIN: elongation factor Tu, mitochondrial [Aptenodytes forsteri]
c109214.graph_c0	23	2.03575	0	0	1.44e-06	-5.01215	down	--	--	--	K10454|5.49196e-08|pbi:103059681|KLHL17; kelch-like family member 17; K10454 kelch-like protein 17 (actinfilin) (A)	[R]	General function prediction only	Kelch motif;; Kelch motif;; Galactose oxidase, central domain;; Galactose oxidase, central domain;; Kelch motif	Influenza virus NS1A-binding protein homolog GN=ivns1abp OS=Xenopus laevis (African clawed frog) PE=2 SV=1	PREDICTED: kelch-like protein 17-like isoform X1 [Oreochromis niloticus]
c105774.graph_c0	23	2.15108	0	0	1.44e-06	-5.01215	down	[O]	Posttranslational modification, protein turnover, chaperones	Molecular Function: protein binding (GO:0005515);; Molecular Function: ion binding (GO:0043167);;	K09503|3.71973e-71|tru:101073610|dnaJ homolog subfamily A member 2-like; K09503 DnaJ homolog subfamily A member 2 (A)	[O]	Posttranslational modification, protein turnover, chaperones	DnaJ central domain;; DnaJ domain	DnaJ homolog subfamily B member 6-A GN=dnajb6-a OS=Xenopus laevis (African clawed frog) PE=2 SV=1	PREDICTED: dnaJ homolog subfamily A member 2-like [Takifugu rubripes]
c97539.graph_c0	24	2.57473	0	0	6.51e-07	-5.07168	down	--	--	--	--	--	--	CAAD domains of cyanobacterial aminoacyl-tRNA synthetase	--	--
c101623.graph_c0	24	1.87554	0	0	6.51e-07	-5.07168	down	[M]	Cell wall/membrane/envelope biogenesis	--	--	[M]	Cell wall/membrane/envelope biogenesis	Glycosyl transferase 4-like domain	--	--
c110421.graph_c0	24	2.10643	0	0	6.51e-07	-5.07168	down	[O]	Posttranslational modification, protein turnover, chaperones	--	K00799|4.74181e-14|gga:423881|GSTO1; glutathione S-transferase omega 1 (EC:2.5.1.18); K00799 glutathione S-transferase [EC:2.5.1.18] (A)	[O]	Posttranslational modification, protein turnover, chaperones	Glutathione S-transferase, N-terminal domain;; Glutathione S-transferase, N-terminal domain;; Glutathione S-transferase, N-terminal domain;; Glutathione S-transferase, C-terminal domain;; Glutathione S-transferase, C-terminal domain	--	PREDICTED: glutathione S-transferase omega-1 isoform X2 [Cuculus canorus]
c90739.graph_c0	24	2.15158	0	0	6.51e-07	-5.07168	down	--	--	--	--	--	--	PsbP	--	--
c95831.graph_c0	24	2.19551	0	0	6.51e-07	-5.07168	down	--	--	--	--	[O]	Posttranslational modification, protein turnover, chaperones	--	--	--
c92667.graph_c0	24	3.63002	0	0	6.51e-07	-5.07168	down	--	--	--	--	[P]	Inorganic ion transport and metabolism	ZIP Zinc transporter	--	--
c103673.graph_c0	24	4.16738	0	0	6.51e-07	-5.07168	down	--	--	--	--	--	--	Thaumatin family	--	--
c52459.graph_c0	24	2.37566	0	0	6.51e-07	-5.07168	down	--	--	--	--	--	--	Pterin 4 alpha carbinolamine dehydratase	--	--
c100406.graph_c0	24	2.06883	0	0	6.51e-07	-5.07168	down	--	--	--	K14709|4.70989e-10|clv:102086491|SLC39A3; solute carrier family 39 (zinc transporter), member 3; K14709 solute carrier family 39 (zinc transporter), member 1/2/3 (A)	[P]	Inorganic ion transport and metabolism	ZIP Zinc transporter	--	PREDICTED: zinc transporter ZIP3 [Columba livia]
c66967.graph_c0	24	2.71397	0	0	6.51e-07	-5.07168	down	--	--	--	--	--	--	Hydrophobic seed protein;; Protease inhibitor/seed storage/LTP family;; Probable lipid transfer	--	--
c106125.graph_c0	24	1.7451	0	0	6.51e-07	-5.07168	down	--	--	--	--	--	--	GUN4-like	--	--
c103474.graph_c0	25	2.23804	0	0	2.95e-07	-5.12886	down	--	--	--	--	--	--	Jacalin-like lectin domain;; Dirigent-like protein	--	--
c75424.graph_c0	25	1.74306	0	0	2.95e-07	-5.12886	down	[O]	Posttranslational modification, protein turnover, chaperones	--	--	--	--	Glutathione S-transferase, N-terminal domain;; Glutathione S-transferase, N-terminal domain;; Glutaredoxin	--	--
c104208.graph_c0	25	1.97584	0	0	2.95e-07	-5.12886	down	[E]	Amino acid transport and metabolism	--	--	[G]	Carbohydrate transport and metabolism	Glyoxalase/Bleomycin resistance protein/Dioxygenase superfamily;; Glyoxalase-like domain;; Glyoxalase/Bleomycin resistance protein/Dioxygenase superfamily	--	PREDICTED: glyoxalase domain-containing protein 4 [Notothenia coriiceps]
c71000.graph_c0	25	2.06155	0	0	2.95e-07	-5.12886	down	--	--	--	--	[R]	General function prediction only	--	--	--
c103550.graph_c0	25	2.4063	0	0	2.95e-07	-5.12886	down	--	--	--	--	--	--	No apical meristem (NAM) protein	--	--
c112395.graph_c0	25	3.09179	0	0	2.95e-07	-5.12886	down	[C]	Energy production and conversion	--	--	[C]	Energy production and conversion	Aldo/keto reductase family	--	PREDICTED: uncharacterized oxidoreductase At1g06690, chloroplastic-like [Oryzias latipes]
c94520.graph_c0	25	2.31058	0	0	2.95e-07	-5.12886	down	[J]	Translation, ribosomal structure and biogenesis	--	--	[J]	Translation, ribosomal structure and biogenesis	Ribosomal protein L6	--	PREDICTED: 50S ribosomal protein L6-like, partial [Oryzias latipes]
c102460.graph_c0	25	2.14912	0	0	2.95e-07	-5.12886	down	[O]	Posttranslational modification, protein turnover, chaperones	Biological Process: protein peptidyl-prolyl isomerization (GO:0000413);; Molecular Function: peptidyl-prolyl cis-trans isomerase activity (GO:0003755);; Biological Process: protein folding (GO:0006457);;	K03768|1.36849e-71|tad:TRIADDRAFT_37364|expressed hypothetical protein; K03768 peptidyl-prolyl cis-trans isomerase B (cyclophilin B) [EC:5.2.1.8] (A)	[O]	Posttranslational modification, protein turnover, chaperones	Cyclophilin type peptidyl-prolyl cis-trans isomerase/CLD	Peptidyl-prolyl cis-trans isomerase B (Precursor) GN=PPIB OS=Gallus gallus (Chicken) PE=2 SV=1	PREDICTED: peptidyl-prolyl cis-trans isomerase B [Astyanax mexicanus]
c53244.graph_c0	25	2.78687	0	0	2.95e-07	-5.12886	down	--	--	--	--	--	--	SAP domain	--	--
c74020.graph_c0	25	4.12977	0	0	2.95e-07	-5.12886	down	[HC]	--	--	--	[CR]	--	FAD binding domain	--	--
c82049.graph_c0	25	1.53493	0	0	2.95e-07	-5.12886	down	[I]	Lipid transport and metabolism	--	--	--	--	GcpE protein	--	--
c88861.graph_c0	25	2.78192	0	0	2.95e-07	-5.12886	down	[J]	Translation, ribosomal structure and biogenesis	--	K03234|3.19788e-74|cel:CELE_F25H5.4|eef-2; Protein EEF-2, isoform B; K03234 elongation factor 2 (A)	[J]	Translation, ribosomal structure and biogenesis	Elongation factor G C-terminus;; Elongation factor G, domain IV	Elongation factor 2 GN=EEF2 OS=Gallus gallus (Chicken) PE=1 SV=3	elongation factor 2 [Ctenopharyngodon idella]
c105955.graph_c0	25	1.7528	0	0	2.95e-07	-5.12886	down	--	--	--	--	[O]	Posttranslational modification, protein turnover, chaperones	Xylanase inhibitor C-terminal;; Xylanase inhibitor N-terminal;; Eukaryotic aspartyl protease	--	--
c19196.graph_c0	25	2.78192	0	0	2.95e-07	-5.12886	down	--	--	--	--	--	--	Esterase PHB depolymerase	--	PREDICTED: uncharacterized protein LOC100497868 [Xenopus (Silurana) tropicalis]
c112139.graph_c0	25	2.40261	0	0	2.95e-07	-5.12886	down	--	--	--	--	[OU]	--	--	--	--
c105191.graph_c0	25	1.77663	0	0	2.95e-07	-5.12886	down	[R]	General function prediction only	--	K13201|4.55328e-19|xla:100381100|tial1, tcbp, tiar; TIA1 cytotoxic granule-associated RNA binding protein-like 1; K13201 nucleolysin TIA-1/TIAR (A)	[R]	General function prediction only	RNA recognition motif. (a.k.a. RRM, RBD, or RNP domain);; RNA recognition motif (a.k.a. RRM, RBD, or RNP domain);; RNA recognition motif. (a.k.a. RRM, RBD, or RNP domain)	Nucleolin GN=NCL OS=Gallus gallus (Chicken) PE=1 SV=1	TIA1 cytotoxic granule-associated RNA binding protein-like 1 [Xenopus laevis]
c97978.graph_c0	25	4.79949	0	0	2.95e-07	-5.12886	down	--	--	--	--	--	--	Chlorophyll A-B binding protein	--	--
c106378.graph_c0	26	2.71501	0	0	1.34e-07	-5.18386	down	--	--	--	--	[R]	General function prediction only	--	--	--
c125233.graph_c0	26	3.09056	0	0	1.34e-07	-5.18386	down	--	--	--	--	--	--	Jacalin-like lectin domain	--	--
c82543.graph_c0	26	3.225	0	0	1.34e-07	-5.18386	down	--	--	--	--	--	--	CP12 domain	--	--
c97016.graph_c0	26	2.25671	0	0	1.34e-07	-5.18386	down	--	--	Biological Process: single-organism cellular process (GO:0044763);; Biological Process: inner ear development (GO:0048839);;	K17479|5.49893e-15|nve:NEMVE_v1g79948|hypothetical protein; K17479 glutaredoxin domain-containing cysteine-rich protein 1 (A)	[O]	Posttranslational modification, protein turnover, chaperones	Glutaredoxin	--	PREDICTED: glutaredoxin domain-containing cysteine-rich protein 1 [Xenopus (Silurana) tropicalis]
c95905.graph_c0	26	2.50255	0	0	1.34e-07	-5.18386	down	[O]	Posttranslational modification, protein turnover, chaperones	Cellular Component: synaptonemal complex (GO:0000795);; Cellular Component: male germ cell nucleus (GO:0001673);; Molecular Function: ATP binding (GO:0005524);; Cellular Component: mitochondrion (GO:0005739);; Biological Process: male meiosis I (GO:0007141);; Biological Process: spermatid development (GO:0007286);; Cellular Component: cell surface (GO:0009986);; Biological Process: positive regul…	K03283|5.54351e-139|phi:102102555|heat shock 70 kDa protein-like; K03283 heat shock 70kDa protein 1/8 (A)	[O]	Posttranslational modification, protein turnover, chaperones	Hsp70 protein	Heat shock 70 kDa protein 1 OS=Oryzias latipes (Medaka fish) PE=3 SV=1	PREDICTED: heat shock 70 kDa protein 1-like, partial [Oreochromis niloticus]
c100609.graph_c0	26	3.47957	0	0	1.34e-07	-5.18386	down	--	--	--	--	[R]	General function prediction only	--	--	--
c105378.graph_c0	27	1.66424	0	0	6.14e-08	-5.23683	down	[MG]	--	--	--	[G]	Carbohydrate transport and metabolism	NADH(P)-binding;; NmrA-like family;; short chain dehydrogenase;; NAD dependent epimerase/dehydratase family;; 3-beta hydroxysteroid dehydrogenase/isomerase family	--	--
c104739.graph_c0	27	2.55182	0	0	6.14e-08	-5.23683	down	--	--	--	--	[R]	General function prediction only	Mpv17 / PMP22 family	Mpv17-like protein 2 GN=mpv17l2 OS=Xenopus tropicalis (Western clawed frog) PE=2 SV=1	uncharacterized protein LOC779393 [Xenopus laevis]
c84432.graph_c0	27	6.75417	0	0	6.14e-08	-5.23683	down	[E]	Amino acid transport and metabolism	Molecular Function: glycine hydroxymethyltransferase activity (GO:0004372);; Cellular Component: nucleus (GO:0005634);; Cellular Component: cytosol (GO:0005829);; Biological Process: cellular metabolic process (GO:0044237);; Biological Process: small molecule metabolic process (GO:0044281);;	K00600|7.33986e-09|dan:Dana_GF22069|GF22069 gene product from transcript GF22069-RA; K00600 glycine hydroxymethyltransferase [EC:2.1.2.1] (A)	[E]	Amino acid transport and metabolism	Serine hydroxymethyltransferase	--	PREDICTED: serine hydroxymethyltransferase, cytosolic isoform X1 [Danio rerio]
c100830.graph_c0	27	2.57902	0	0	6.14e-08	-5.23683	down	[IQ]	--	--	--	[CIQ]	--	Phosphopantetheine attachment site	--	--
c123807.graph_c0	27	3.79985	0	0	6.14e-08	-5.23683	down	[G]	Carbohydrate transport and metabolism	Biological Process: somitogenesis (GO:0001756);; Biological Process: thigmotaxis (GO:0001966);; Molecular Function: catalytic activity (GO:0003824);; Biological Process: axonogenesis (GO:0007409);; Biological Process: brain development (GO:0007420);; Biological Process: pigmentation (GO:0043473);;	K01623|2.09673e-36|cel:CELE_F01F1.12|aldo-2; Protein ALDO-2, isoform B; K01623 fructose-bisphosphate aldolase, class I [EC:4.1.2.13] (A)	[G]	Carbohydrate transport and metabolism	Fructose-bisphosphate aldolase class-I	Fructose-bisphosphate aldolase, non-muscle type OS=Lampetra japonica (Japanese lamprey) PE=2 SV=1	PREDICTED: fructose-bisphosphate aldolase C [Stegastes partitus]
c101684.graph_c0	27	2.39656	0	0	6.14e-08	-5.23683	down	[GEPR]	--	--	K08150|1.32368e-38|hmg:100206721|proton myo-inositol cotransporter-like; K08150 MFS transporter, SP family, solute carrier family 2 (myo-inositol transporter), member 13 (A)	[R]	General function prediction only	Sugar (and other) transporter;; Major Facilitator Superfamily	Solute carrier family 2, facilitated glucose transporter member 12 GN=slc2a12 OS=Xenopus laevis (African clawed frog) PE=2 SV=1	PREDICTED: proton myo-inositol cotransporter-like isoform X3 [Cynoglossus semilaevis]
c104314.graph_c0	27	2.30213	0	0	6.14e-08	-5.23683	down	[J]	Translation, ribosomal structure and biogenesis	--	--	[J]	Translation, ribosomal structure and biogenesis	KOW motif	--	--
c99697.graph_c0	28	2.41696	0	0	2.81e-08	-5.28793	down	[R]	General function prediction only	--	--	--	--	--	--	--
c101898.graph_c0	28	2.4575	0	0	2.81e-08	-5.28793	down	--	--	--	--	--	--	SAP domain;; Rho termination factor, N-terminal domain	--	--
c93151.graph_c0	28	3.50776	0	0	2.81e-08	-5.28793	down	[Q]	Secondary metabolites biosynthesis, transport and catabolism	--	--	[Q]	Secondary metabolites biosynthesis, transport and catabolism	Retinal pigment epithelial membrane protein	--	PREDICTED: beta,beta-carotene 15,15&apos;-monooxygenase-like [Astyanax mexicanus]
c101183.graph_c0	28	2.49591	0	0	2.81e-08	-5.28793	down	[C]	Energy production and conversion	--	--	[C]	Energy production and conversion	Aldo/keto reductase family	Voltage-gated potassium channel subunit beta-2 GN=kcnab2 OS=Xenopus laevis (African clawed frog) PE=2 SV=1	unnamed protein product [Tetraodon nigroviridis]
c100839.graph_c0	28	2.61481	0	0	2.81e-08	-5.28793	down	--	--	--	--	[R]	General function prediction only	--	--	--
c114573.graph_c0	28	1.53709	0	0	2.81e-08	-5.28793	down	--	--	--	--	--	--	L1 transposable element	--	PREDICTED: mucin-5AC-like [Xenopus (Silurana) tropicalis]
c96409.graph_c0	28	3.11024	0	0	2.81e-08	-5.28793	down	--	--	--	--	--	--	NADH dehydrogenase transmembrane subunit	--	--
c112217.graph_c0	28	3.36974	0	0	2.81e-08	-5.28793	down	--	--	--	--	--	--	Dehydrin	--	--
c105817.graph_c0	28	2.51018	0	0	2.81e-08	-5.28793	down	[O]	Posttranslational modification, protein turnover, chaperones	--	K09514|8.30052e-13|tup:102482409|DNAJB8; DnaJ (Hsp40) homolog, subfamily B, member 8; K09514 DnaJ homolog subfamily B member 8 (A)	[O]	Posttranslational modification, protein turnover, chaperones	DnaJ domain	DnaJ homolog subfamily B member 6-A GN=dnajb6-a OS=Xenopus laevis (African clawed frog) PE=2 SV=1	DnaJ subfamily B member 6, partial [Picoides pubescens]
c85831.graph_c0	28	4.24526	0	0	2.81e-08	-5.28793	down	--	--	--	--	--	--	Zinc-binding;; 4F5 protein family	--	--
c127034.graph_c0	29	2.68422	0	0	1.29e-08	-5.33729	down	[G]	Carbohydrate transport and metabolism	--	K01229|3.25466e-58|lgi:LOTGIDRAFT_131754|hypothetical protein; K01229 lactase-phlorizin hydrolase [EC:3.2.1.108 3.2.1.62] (A)	[G]	Carbohydrate transport and metabolism	Glycosyl hydrolase family 1	--	Lactase-phlorizin hydrolase, partial [Manacus vitellinus]
c103430.graph_c0	29	6.92319	0	0	1.29e-08	-5.33729	down	--	--	--	--	--	--	Photosystem I psaG / psaK	--	--
c84809.graph_c0	29	4.23317	0	0	1.29e-08	-5.33729	down	--	--	--	K06236|9.91717e-13|nle:101179187|uncharacterized LOC101179187; K06236 collagen, type I/II/III/V/XI/XXIV/XXVII, alpha (A)	--	--	--	--	--
c108744.graph_c0	29	3.13257	0	0	1.29e-08	-5.33729	down	--	--	--	--	--	--	PetM family of cytochrome b6f complex subunit 7	--	--
c19562.graph_c0	29	2.40404	0	0	1.29e-08	-5.33729	down	--	--	--	--	[P]	Inorganic ion transport and metabolism	Heavy-metal-associated domain	--	--
c105676.graph_c0	29	3.42439	0	0	1.29e-08	-5.33729	down	--	--	Molecular Function: DNA binding (GO:0003677);; Molecular Function: zinc ion binding (GO:0008270);;	--	[R]	General function prediction only	AN1-like Zinc finger;; A20-like zinc finger	--	PREDICTED: AN1-type zinc finger protein 5-like, partial [Phaethon lepturus]
c111369.graph_c0	29	2.33912	0	0	1.29e-08	-5.33729	down	--	--	Biological Process: transport (GO:0006810);; Molecular Function: substrate-specific transmembrane transporter activity (GO:0022891);;	K09884|9.1525e-42|tca:661619|aquaporin AQPcic; K09884 aquaporin rerated protein, invertebrate (A)	[G]	Carbohydrate transport and metabolism	Major intrinsic protein	Aquaporin FA-CHIP GN=AQPA OS=Pelophylax esculentus (Edible frog) PE=2 SV=1	PREDICTED: aquaporin FA-CHIP-like isoform 2 [Takifugu rubripes]
c73032.graph_c0	29	4.57374	0	0	1.29e-08	-5.33729	down	[G]	Carbohydrate transport and metabolism	Biological Process: microtubule cytoskeleton organization (GO:0000226);; Biological Process: nuclear membrane fusion (GO:0000740);; Molecular Function: glyceraldehyde-3-phosphate dehydrogenase (NAD+) (phosphorylating) activity (GO:0004365);; Cellular Component: nucleus (GO:0005634);; Cellular Component: cytosol (GO:0005829);; Biological Process: gluconeogenesis (GO:0006094);; Biological Process: …	K00134|1.80648e-74|spu:578260|glyceraldehyde-3-phosphate dehydrogenase-like; K00134 glyceraldehyde 3-phosphate dehydrogenase [EC:1.2.1.12] (A)	[G]	Carbohydrate transport and metabolism	Glyceraldehyde 3-phosphate dehydrogenase, NAD binding domain;; Glyceraldehyde 3-phosphate dehydrogenase, C-terminal domain	Glyceraldehyde-3-phosphate dehydrogenase GN=GAPDH OS=Pelodiscus sinensis (Chinese softshell turtle) PE=2 SV=1	glyceraldehyde 3-phosphate dehydrogenase, partial [Epinephelus bruneus]
c95124.graph_c0	30	2.41358	0	0	5.93e-09	-5.38501	down	--	--	Biological Process: phosphate-containing compound metabolic process (GO:0006796);; Molecular Function: transferase activity (GO:0016740);; Biological Process: organic substance metabolic process (GO:0071704);;	K01103|4.99931e-79|lgi:LOTGIDRAFT_186853|hypothetical protein (A)	[G]	Carbohydrate transport and metabolism	6-phosphofructo-2-kinase;; Histidine phosphatase superfamily (branch 1)	Fructose-2,6-bisphosphatase OS=Gallus gallus (Chicken) PE=2 SV=2	Pfkfb4 protein [Danio rerio]
c104982.graph_c0	30	2.43229	0	0	5.93e-09	-5.38501	down	[O]	Posttranslational modification, protein turnover, chaperones	Molecular Function: oxidoreductase activity (GO:0016491);;	K00432|2.3667e-57|loa:LOAG_10617|hypothetical protein; K00432 glutathione peroxidase [EC:1.11.1.9] (A)	[O]	Posttranslational modification, protein turnover, chaperones	Glutathione peroxidase;; AhpC/TSA family;; Redoxin	Probable glutathione peroxidase 8-B GN=gpx8-b OS=Xenopus laevis (African clawed frog) PE=2 SV=1	Probable phospholipid hydroperoxide glutathione peroxidase [Salmo salar]
c51188.graph_c0	30	1.99415	0	0	5.93e-09	-5.38501	down	[H]	Coenzyme transport and metabolism	--	--	--	--	Magnesium chelatase, subunit ChlI;; MCM2/3/5 family	--	--
c108980.graph_c0	30	2.95095	0	0	5.93e-09	-5.38501	down	--	--	--	--	--	--	Pathogenesis-related protein Bet v I family	--	--
c96075.graph_c0	30	2.5719	0	0	5.93e-09	-5.38501	down	[T]	Signal transduction mechanisms	--	--	--	--	Universal stress protein family	--	--
c85968.graph_c0	30	2.03953	0	0	5.93e-09	-5.38501	down	--	--	--	--	--	--	DREPP plasma membrane polypeptide	--	--
c95783.graph_c0	30	2.5304	0	0	5.93e-09	-5.38501	down	--	--	--	--	--	--	Allinase	--	--
c105293.graph_c0	31	3.37768	0	0	2.74e-09	-5.4312	down	[CR]	--	--	--	[CR]	--	Zinc-binding dehydrogenase;; Alcohol dehydrogenase GroES-like domain	Reticulon-4-interacting protein 1 homolog, mitochondrial (Precursor) GN=rtn4ip1 OS=Danio rerio (Zebrafish) PE=2 SV=2	PREDICTED: reticulon-4-interacting protein 1 homolog, mitochondrial-like [Larimichthys crocea]
c111709.graph_c0	31	2.8821	0	0	2.74e-09	-5.4312	down	--	--	--	--	[DZ]	--	Translationally controlled tumour protein	Translationally-controlled tumor protein homolog GN=tpt1 OS=Labeo rohita (Indian major carp) PE=2 SV=1	PREDICTED: translationally-controlled tumor protein homolog, partial [Haliaeetus albicilla]
c100337.graph_c0	31	3.40132	0	0	2.74e-09	-5.4312	down	[R]	General function prediction only	--	--	--	--	--	--	--
c95864.graph_c0	31	4.57838	0	0	2.74e-09	-5.4312	down	[Q]	Secondary metabolites biosynthesis, transport and catabolism	--	--	[Q]	Secondary metabolites biosynthesis, transport and catabolism	Retinal pigment epithelial membrane protein	--	--
c105555.graph_c0	31	3.14295	0	0	2.74e-09	-5.4312	down	[MG]	--	--	--	[G]	Carbohydrate transport and metabolism	NADH(P)-binding;; NmrA-like family;; 3-beta hydroxysteroid dehydrogenase/isomerase family	--	--
c93481.graph_c0	31	2.0738	0	0	2.74e-09	-5.4312	down	[C]	Energy production and conversion	--	--	[C]	Energy production and conversion	Inorganic pyrophosphatase	--	PREDICTED: inorganic pyrophosphatase 2, mitochondrial isoform X4 [Chrysemys picta bellii]
c99755.graph_c0	31	2.19555	0	0	2.74e-09	-5.4312	down	[LKJ]	--	--	K13183|6.95537e-58|hgl:101704536|Ddx50; DEAD (Asp-Glu-Ala-Asp) box polypeptide 50; K13183 ATP-dependent RNA helicase DDX50 [EC:3.6.4.13] (A)	[A]	RNA processing and modification	DEAD/DEAH box helicase;; Type III restriction enzyme, res subunit	Probable ATP-dependent RNA helicase DDX46 GN=ddx46 OS=Danio rerio (Zebrafish) PE=2 SV=1	PREDICTED: nucleolar RNA helicase 2-like, partial [Colius striatus]
c99666.graph_c0	31	2.46557	0	0	2.74e-09	-5.4312	down	[G]	Carbohydrate transport and metabolism	Molecular Function: catalytic activity (GO:0003824);;	--	[G]	Carbohydrate transport and metabolism	Glycosyl hydrolase family 1	--	Lactase-phlorizin hydrolase, partial [Manacus vitellinus]
c96265.graph_c0	32	2.47299	0	0	1.27e-09	-5.47596	down	--	--	--	--	[G]	Carbohydrate transport and metabolism	Starch binding domain	--	--
c72382.graph_c0	32	1.77218	0	0	1.27e-09	-5.47596	down	--	--	--	K01369|2.21069e-46|bmy:Bm1_50230|Peptidase C13 family protein; K01369 legumain [EC:3.4.22.34] (A)	[O]	Posttranslational modification, protein turnover, chaperones	Peptidase C13 family	--	legumain precursor [Danio rerio]
c102151.graph_c0	32	2.29751	0	0	1.27e-09	-5.47596	down	[J]	Translation, ribosomal structure and biogenesis	--	--	[J]	Translation, ribosomal structure and biogenesis	Ribosomal protein L18e/L15	--	--
c89452.graph_c0	32	5.16373	0	0	1.27e-09	-5.47596	down	[J]	Translation, ribosomal structure and biogenesis	--	--	[J]	Translation, ribosomal structure and biogenesis	Ribosomal protein L7/L12 C-terminal domain	--	--
c105746.graph_c0	32	3.29763	0	0	1.27e-09	-5.47596	down	[C]	Energy production and conversion	--	--	--	--	Rubredoxin	--	--
c78891.graph_c0	32	1.76129	0	0	1.27e-09	-5.47596	down	--	--	--	K17571|3.55825e-158|xtr:100497386|ppp1r32; protein phosphatase 1, regulatory subunit 32; K17571 protein phosphatase 1 regulatory subunit 32 (A)	--	--	--	--	PREDICTED: protein phosphatase 1 regulatory subunit 32 isoform X1 [Xenopus (Silurana) tropicalis]
c109191.graph_c0	12185	168.33	370	4.13477	0	-5.51368	down	--	--	--	--	[I]	Lipid transport and metabolism	Lipoprotein amino terminal region;; Domain of unknown function (DUF1943)	YGP42 (Precursor) GN=VTG1 OS=Gallus gallus (Chicken) PE=1 SV=1	vitellogenin, partial [Rana pipiens]
c100152.graph_c0	33	5.38046	0	0	5.87e-10	-5.51937	down	[G]	Carbohydrate transport and metabolism	Molecular Function: hydrolase activity (GO:0016787);;	K03841|1.31997e-14|bmor:732915|fructose-1,6-bisphosphatase (EC:3.1.3.11); K03841 fructose-1,6-bisphosphatase I [EC:3.1.3.11] (A)	[G]	Carbohydrate transport and metabolism	Fructose-1-6-bisphosphatase	--	PREDICTED: fructose-1,6-bisphosphatase isozyme 2-like [Oryzias latipes]
c106283.graph_c0	33	4.0139	0	0	5.87e-10	-5.51937	down	[G]	Carbohydrate transport and metabolism	Molecular Function: hydrolase activity (GO:0016787);;	K03841|4.80167e-42|nve:NEMVE_v1g74095|hypothetical protein; K03841 fructose-1,6-bisphosphatase I [EC:3.1.3.11] (A)	[G]	Carbohydrate transport and metabolism	Fructose-1-6-bisphosphatase	--	Fructose-1,6-bisphosphatase 1, partial [Cathartes aura]
c112159.graph_c0	33	3.13068	0	0	5.87e-10	-5.51937	down	--	--	--	K01365|1.60726e-54|cqu:CpipJ_CPIJ006471|cathepsin l; K01365 cathepsin L [EC:3.4.22.15] (A)	[O]	Posttranslational modification, protein turnover, chaperones	Papain family cysteine protease;; Cathepsin propeptide inhibitor domain (I29)	Cathepsin K (Precursor) GN=CTSK OS=Gallus gallus (Chicken) PE=2 SV=1	PREDICTED: cathepsin L1-like [Lepisosteus oculatus]
c110948.graph_c0	33	2.9004	0	0	5.87e-10	-5.51937	down	--	--	--	K10802|7.07044e-16|xma:102238067|high mobility group-T protein-like; K10802 high mobility group protein B1 (A)	[R]	General function prediction only	HMG (high mobility group) box;; HMG-box domain	High mobility group-T protein OS=Oncorhynchus mykiss (Rainbow trout) PE=2 SV=2	PREDICTED: high mobility group protein B1 [Poecilia reticulata]
c89762.graph_c0	33	7.16904	0	0	5.87e-10	-5.51937	down	[C]	Energy production and conversion	--	--	[C]	Energy production and conversion	ATP synthase	--	--
c100489.graph_c0	34	2.04546	0	0	2.73e-10	-5.56151	down	--	--	--	--	--	--	--	--	reverse transcriptase [Fundulus heteroclitus]
c103769.graph_c0	34	2.00886	0	0	2.73e-10	-5.56151	down	--	--	--	--	--	--	GUCT (NUC152) domain;; Zinc knuckle	--	--
c107488.graph_c0	34	3.28264	0	0	2.73e-10	-5.56151	down	[O]	Posttranslational modification, protein turnover, chaperones	Biological Process: positive regulation of cytokine production (GO:0001819);; Biological Process: lymphocyte mediated immunity (GO:0002449);; Biological Process: adaptive immune response based on somatic recombination of immune receptors built from immunoglobulin superfamily domains (GO:0002460);; Biological Process: positive regulation of immune system process (GO:0002684);; Molecular Function: …	--	[O]	Posttranslational modification, protein turnover, chaperones	TCP-1/cpn60 chaperonin family	60 kDa heat shock protein, mitochondrial (Precursor) OS=Gallus gallus (Chicken) PE=1 SV=1	heat shock protein [Epinephelus akaara]
c92764.graph_c0	34	7.28536	0	0	2.73e-10	-5.56151	down	[O]	Posttranslational modification, protein turnover, chaperones	Molecular Function: antioxidant activity (GO:0016209);; Molecular Function: peroxiredoxin activity (GO:0051920);; Biological Process: oxidation-reduction process (GO:0055114);;	--	[O]	Posttranslational modification, protein turnover, chaperones	AhpC/TSA family	Peroxiredoxin-1 GN=PRDX1 OS=Gecko japonicus (Japanese gecko) PE=2 SV=1	natural killer enhancing factor [Scophthalmus maximus]
c36652.graph_c0	34	6.22279	0	0	2.73e-10	-5.56151	down	--	--	--	--	[T]	Signal transduction mechanisms	EF hand;; EF-hand domain pair;; EF-hand domain pair;; EF-hand domain;; EF hand	--	--
c99012.graph_c0	34	3.30297	0	0	2.73e-10	-5.56151	down	[J]	Translation, ribosomal structure and biogenesis	--	--	[J]	Translation, ribosomal structure and biogenesis	Ribosomal L27 protein	--	PREDICTED: 39S ribosomal protein L27, mitochondrial [Python bivittatus]
c105787.graph_c0	34	2.43831	0	0	2.73e-10	-5.56151	down	[O]	Posttranslational modification, protein turnover, chaperones	--	--	[O]	Posttranslational modification, protein turnover, chaperones	Redoxin;; AhpC/TSA family	--	Peroxiredoxin-5, mitochondrial precursor [Salmo salar]
c104973.graph_c0	34	2.32406	0	0	2.73e-10	-5.56151	down	[R]	General function prediction only	--	--	[R]	General function prediction only	Pyridine nucleotide-disulphide oxidoreductase;; Pyridine nucleotide-disulphide oxidoreductase;; FAD dependent oxidoreductase;; Tryptophan halogenase	--	PREDICTED: apoptosis-inducing factor 3-like isoform X5 [Latimeria chalumnae]
c102816.graph_c0	35	3.23005	0	0	1.27e-10	-5.60246	down	[S]	Function unknown	--	--	[P]	Inorganic ion transport and metabolism	Iron-sulphur cluster biosynthesis	Iron-sulfur cluster assembly 1 homolog, mitochondrial (Precursor) GN=ISCA1 OS=Gallus gallus (Chicken) PE=2 SV=1	PREDICTED: iron-sulfur cluster assembly 1 homolog, mitochondrial [Callorhinchus milii]
c99816.graph_c0	35	3.20179	0	0	1.27e-10	-5.60246	down	--	--	--	--	--	--	CAAD domains of cyanobacterial aminoacyl-tRNA synthetase	--	--
c106175.graph_c0	35	2.80505	0	0	1.27e-10	-5.60246	down	[E]	Amino acid transport and metabolism	--	--	--	--	Glyoxalase/Bleomycin resistance protein/Dioxygenase superfamily;; Glyoxalase-like domain;; Glyoxalase/Bleomycin resistance protein/Dioxygenase superfamily	--	--
c123466.graph_c0	35	2.48728	0	0	1.27e-10	-5.60246	down	--	--	--	K06471|0|pps:100977201|PECAM1; platelet/endothelial cell adhesion molecule 1; K06471 platelet/endothelial cell adhesion molecule (A)	--	--	Immunoglobulin domain;; Immunoglobulin domain;; Immunoglobulin I-set domain	--	PREDICTED: platelet endothelial cell adhesion molecule isoform X2 [Alligator sinensis]
c47956.graph_c0	36	2.18253	0	0	5.96e-11	-5.64227	down	[P]	Inorganic ion transport and metabolism	--	--	[P]	Inorganic ion transport and metabolism	TrkA-N domain	--	--
c101202.graph_c0	36	7.55899	0	0	5.96e-11	-5.64227	down	[G]	Carbohydrate transport and metabolism	--	--	[G]	Carbohydrate transport and metabolism	Ribulose-phosphate 3 epimerase family	--	--
c108583.graph_c0	36	2.69255	0	0	5.96e-11	-5.64227	down	--	--	--	--	[R]	General function prediction only	Protein kinase domain	--	--
c101602.graph_c0	36	2.79243	0	0	5.96e-11	-5.64227	down	[O]	Posttranslational modification, protein turnover, chaperones	--	K01373|7.4783e-59|hro:HELRODRAFT_157956|hypothetical protein; K01373 cathepsin F [EC:3.4.22.41] (A)	[O]	Posttranslational modification, protein turnover, chaperones	Papain family cysteine protease	Cathepsin L1 light chain (Fragments) GN=CTSL OS=Gallus gallus (Chicken) PE=1 SV=1	PREDICTED: cathepsin F-like [Alligator sinensis]
c95848.graph_c0	36	2.23656	0	0	5.96e-11	-5.64227	down	--	--	--	K15104|9.41237e-62|tsp:Tsp_00499|hypothetical protein; K15104 solute carrier family 25 (mitochondrial oxoglutarate transporter), member 11 (A)	[C]	Energy production and conversion	Mitochondrial carrier protein	Kidney mitochondrial carrier protein 1 GN=slc25a30 OS=Xenopus laevis (African clawed frog) PE=2 SV=1	PREDICTED: mitochondrial 2-oxoglutarate/malate carrier protein isoform X2 [Chrysemys picta bellii]
c114138.graph_c0	73	7.5062	1	0.0831781	0	-5.66385	down	[O]	Posttranslational modification, protein turnover, chaperones	Biological Process: protein peptidyl-prolyl isomerization (GO:0000413);; Biological Process: response to hypoxia (GO:0001666);; Molecular Function: peptidyl-prolyl cis-trans isomerase activity (GO:0003755);; Biological Process: protein folding (GO:0006457);;	--	[O]	Posttranslational modification, protein turnover, chaperones	Cyclophilin type peptidyl-prolyl cis-trans isomerase/CLD	Peptidyl-prolyl cis-trans isomerase B (Precursor) GN=PPIB OS=Gallus gallus (Chicken) PE=2 SV=1	unnamed protein product, partial [Tetraodon nigroviridis]
c99837.graph_c0	37	3.15477	0	0	2.79e-11	-5.68102	down	[O]	Posttranslational modification, protein turnover, chaperones	Biological Process: protein polyubiquitination (GO:0000209);; Molecular Function: ubiquitin-protein transferase activity (GO:0004842);; Molecular Function: ATP binding (GO:0005524);; Biological Process: ubiquitin-dependent protein catabolic process (GO:0006511);; Biological Process: positive regulation of protein ubiquitination (GO:0031398);; Molecular Function: mitogen-activated protein kinase k…	K06689|1.8371e-84|xtr:100497147|ubiquitin-conjugating enzyme E2 D4-like; K06689 ubiquitin-conjugating enzyme E2 D/E [EC:6.3.2.19] (A)	[O]	Posttranslational modification, protein turnover, chaperones	Ubiquitin-conjugating enzyme;; RWD domain	Ubiquitin-conjugating enzyme E2 D4 {ECO:0000250|UniProtKB:Q9Y2X8} GN=ube2d4 OS=Xenopus laevis (African clawed frog) PE=1 SV=1	ubiquitin-conjugating enzyme E2 D4 [Xenopus laevis]
c109796.graph_c0	38	2.27519	0	0	1.31e-11	-5.71876	down	[M]	Cell wall/membrane/envelope biogenesis	--	--	--	--	--	--	--
c112500.graph_c0	38	2.86606	0	0	1.31e-11	-5.71876	down	[J]	Translation, ribosomal structure and biogenesis	Biological Process: maturation of SSU-rRNA from tricistronic rRNA transcript (SSU-rRNA, 5.8S rRNA, LSU-rRNA) (GO:0000462);; Molecular Function: structural constituent of ribosome (GO:0003735);; Biological Process: translational elongation (GO:0006414);; Cellular Component: cytosolic small ribosomal subunit (GO:0022627);;	K02995|3.67558e-75|nve:NEMVE_v1g195152|hypothetical protein; K02995 small subunit ribosomal protein S8e (A)	[J]	Translation, ribosomal structure and biogenesis	Ribosomal protein S8e	40S ribosomal protein S8 GN=rps8 OS=Ictalurus punctatus (Channel catfish) PE=2 SV=3	PREDICTED: 40S ribosomal protein S8-like [Oreochromis niloticus]
c97749.graph_c0	38	3.10903	0	0	1.31e-11	-5.71876	down	[IQ]	--	--	--	[CIQ]	--	Phosphopantetheine attachment site	--	--
c105133.graph_c0	38	2.03268	0	0	1.31e-11	-5.71876	down	[J]	Translation, ribosomal structure and biogenesis	--	--	[J]	Translation, ribosomal structure and biogenesis	Ribosomal protein S5, N-terminal domain;; Ribosomal protein S5, C-terminal domain	--	--
c109834.graph_c0	38	2.51792	0	0	1.31e-11	-5.71876	down	[H]	Coenzyme transport and metabolism	--	--	[E]	Amino acid transport and metabolism	Aminotransferase class-III	Ethanolamine-phosphate phospho-lyase GN=etnppl OS=Xenopus laevis (African clawed frog) PE=2 SV=1	PREDICTED: ornithine aminotransferase, mitochondrial isoform X3 [Poecilia reticulata]
c104246.graph_c0	38	3.14181	0	0	1.31e-11	-5.71876	down	[J]	Translation, ribosomal structure and biogenesis	--	--	--	--	Ribosomal protein S20	--	--
c110608.graph_c0	38	2.32399	0	0	1.31e-11	-5.71876	down	--	--	--	--	--	--	CAAX protease self-immunity	--	--
c114443.graph_c0	39	2.24096	0	0	6.18e-12	-5.75553	down	[U]	Intracellular trafficking, secretion, and vesicular transport	--	--	[OU]	--	60Kd inner membrane protein	--	Inner membrane protein OXA1L, mitochondrial precursor [Osmerus mordax]
c107654.graph_c0	39	3.33436	0	0	6.18e-12	-5.75553	down	[C]	Energy production and conversion	--	--	--	--	2Fe-2S iron-sulfur cluster binding domain	--	--
c98476.graph_c1	39	2.52029	0	0	6.18e-12	-5.75553	down	[RTKL]	--	Molecular Function: transferase activity (GO:0016740);;	K04730|3.34781e-39|acs:100563977|irak1; interleukin-1 receptor-associated kinase 1; K04730 interleukin-1 receptor-associated kinase 1 [EC:2.7.11.1] (A)	--	--	Protein kinase domain;; Protein tyrosine kinase	Serine/threonine-protein kinase B-raf GN=BRAF OS=Gallus gallus (Chicken) PE=1 SV=1	PREDICTED: interleukin-1 receptor-associated kinase 1 isoform X2 [Anolis carolinensis]
c109243.graph_c0	39	3.6045	0	0	6.18e-12	-5.75553	down	[J]	Translation, ribosomal structure and biogenesis	--	--	[J]	Translation, ribosomal structure and biogenesis	Ribosomal protein L9, C-terminal domain;; Ribosomal protein L9, N-terminal domain	--	--
c99540.graph_c0	39	3.6584	0	0	6.18e-12	-5.75553	down	--	--	--	--	--	--	PAP_fibrillin	--	--
c102871.graph_c0	40	2.82978	0	0	2.92e-12	-5.79139	down	[J]	Translation, ribosomal structure and biogenesis	--	--	[J]	Translation, ribosomal structure and biogenesis	Ribosomal protein L19	--	--
c109852.graph_c0	40	4.814	0	0	2.92e-12	-5.79139	down	--	--	--	--	[QR]	--	non-haem dioxygenase in morphine synthesis N-terminal	--	ACC synthase [Limnodynastes tasmaniensis]
c125510.graph_c0	40	2.4368	0	0	2.92e-12	-5.79139	down	--	--	--	--	--	--	Agglutinin;; Aerolysin toxin	Natterin-3 (Precursor) OS=Thalassophryne nattereri (Niquim) PE=1 SV=1	PREDICTED: natterin-3-like [Pundamilia nyererei]
c100796.graph_c0	40	5.50588	0	0	2.92e-12	-5.79139	down	--	--	--	--	--	--	Myb-like DNA-binding domain;; Myb-like DNA-binding domain	--	--
c111189.graph_c0	41	2.93361	0	0	1.38e-12	-5.82637	down	[J]	Translation, ribosomal structure and biogenesis	--	--	[J]	Translation, ribosomal structure and biogenesis	Ribosomal protein L3	--	PREDICTED: 39S ribosomal protein L3, mitochondrial [Callorhinchus milii]
c112746.graph_c0	41	2.07966	0	0	1.38e-12	-5.82637	down	--	--	--	--	[E]	Amino acid transport and metabolism	--	--	--
c99017.graph_c0	41	4.77407	0	0	1.38e-12	-5.82637	down	[O]	Posttranslational modification, protein turnover, chaperones	Molecular Function: antioxidant activity (GO:0016209);; Molecular Function: peroxiredoxin activity (GO:0051920);; Biological Process: oxidation-reduction process (GO:0055114);;	K03386|2.70316e-65|isc:IscW_ISCW015321|thioredoxin-dependent peroxide reductase (EC:1.11.1.15); K03386 peroxiredoxin (alkyl hydroperoxide reductase subunit C) [EC:1.11.1.15] (A)	[O]	Posttranslational modification, protein turnover, chaperones	AhpC/TSA family;; C-terminal domain of 1-Cys peroxiredoxin;; Redoxin	Peroxiredoxin-1 GN=PRDX1 OS=Gallus gallus (Chicken) PE=1 SV=1	Peroxiredoxin-1, partial [Chaetura pelagica]
c105392.graph_c0	41	3.33707	0	0	1.38e-12	-5.82637	down	[J]	Translation, ribosomal structure and biogenesis	Biological Process: translational elongation (GO:0006414);; Molecular Function: translation factor activity, nucleic acid binding (GO:0008135);; Biological Process: single-organism process (GO:0044699);; Biological Process: positive regulation of translation (GO:0045727);;	K03263|2.13484e-49|mde:101899179|eukaryotic translation initiation factor 5A-like; K03263 translation initiation factor 5A (A)	[J]	Translation, ribosomal structure and biogenesis	Eukaryotic elongation factor 5A hypusine, DNA-binding OB fold;; KOW motif	Eukaryotic translation initiation factor 5A-2 GN=EIF5A2 OS=Gallus gallus (Chicken) PE=1 SV=3	eukaryotic translation initiation factor 5A-1 [Danio rerio]
c100624.graph_c0	41	3.31129	0	0	1.38e-12	-5.82637	down	[G]	Carbohydrate transport and metabolism	--	K01091|1.5938e-34|mze:101471990|phosphoglycolate phosphatase-like; K01091 phosphoglycolate phosphatase [EC:3.1.3.18] (A)	[P]	Inorganic ion transport and metabolism	HAD-hyrolase-like;; Haloacid dehalogenase-like hydrolase;; Mitochondrial PGP phosphatase	Phosphoglycolate phosphatase GN=PGP OS=Gallus gallus (Chicken) PE=2 SV=1	PREDICTED: phosphoglycolate phosphatase-like [Maylandia zebra]
c102601.graph_c0	41	5.20391	0	0	1.38e-12	-5.82637	down	--	--	--	K15101|3.27569e-23|bfo:BRAFLDRAFT_125976|hypothetical protein; K15101 solute carrier family 25 (mitochondrial ornithine transporter) member 2/15 (A)	[C]	Energy production and conversion	Mitochondrial carrier protein	Mitochondrial uncoupling protein 2 GN=ucp2 OS=Cyprinus carpio (Common carp) PE=2 SV=1	PREDICTED: mitochondrial carnitine/acylcarnitine carrier protein-like [Lepisosteus oculatus]
c109358.graph_c0	41	2.38427	0	0	1.38e-12	-5.82637	down	[R]	General function prediction only	--	--	[R]	General function prediction only	Haloacid dehalogenase-like hydrolase;; HAD-hyrolase-like;; haloacid dehalogenase-like hydrolase	--	PREDICTED: pseudouridine-5&apos;-monophosphatase [Cynoglossus semilaevis]
c113945.graph_c0	41	3.91033	0	0	1.38e-12	-5.82637	down	--	--	Molecular Function: protein binding (GO:0005515);; Cellular Component: microtubule cytoskeleton (GO:0015630);; Biological Process: regulation of metabolic process (GO:0019222);; Cellular Component: organelle part (GO:0044422);; Biological Process: single-organism process (GO:0044699);; Biological Process: regulation of cellular process (GO:0050794);;	--	[T]	Signal transduction mechanisms	EF hand;; EF-hand domain pair;; EF-hand domain pair;; EF-hand domain;; EF hand;; Secreted protein acidic and rich in cysteine Ca binding region	Neo-calmodulin (Fragment) OS=Gallus gallus (Chicken) PE=2 SV=1	putative calmodulin variant 1 [Taeniopygia guttata]
c108799.graph_c0	42	5.05955	0	0	6.56e-13	-5.86053	down	[G]	Carbohydrate transport and metabolism	Cellular Component: chromosome (GO:0005694);; Cellular Component: cytosol (GO:0005829);; Biological Process: gluconeogenesis (GO:0006094);; Biological Process: glycolytic process (GO:0006096);; Biological Process: small molecule metabolic process (GO:0044281);;	--	[G]	Carbohydrate transport and metabolism	Phosphoglycerate kinase	Phosphoglycerate kinase GN=PGK OS=Gallus gallus (Chicken) PE=2 SV=2	PREDICTED: phosphoglycerate kinase 1 [Chrysemys picta bellii]
c100488.graph_c0	42	2.68922	0	0	6.56e-13	-5.86053	down	--	--	--	--	--	--	Domain of unknown function (DUF4033)	--	--
c108270.graph_c0	42	3.00516	0	0	6.56e-13	-5.86053	down	[O]	Posttranslational modification, protein turnover, chaperones	--	K07304|1.65418e-46|hro:HELRODRAFT_87443|hypothetical protein; K07304 peptide-methionine (S)-S-oxide reductase [EC:1.8.4.11] (A)	[O]	Posttranslational modification, protein turnover, chaperones	Peptide methionine sulfoxide reductase	--	PREDICTED: mitochondrial peptide methionine sulfoxide reductase-like [Lepisosteus oculatus]
c104459.graph_c0	42	4.08014	0	0	6.56e-13	-5.86053	down	[J]	Translation, ribosomal structure and biogenesis	Molecular Function: nucleotide binding (GO:0000166);; Cellular Component: cytoskeleton (GO:0005856);; Cellular Component: protein complex (GO:0043234);; Biological Process: cellular metabolic process (GO:0044237);; Biological Process: primary metabolic process (GO:0044238);; Biological Process: organic substance metabolic process (GO:0071704);;	--	[J]	Translation, ribosomal structure and biogenesis	Elongation factor Tu GTP binding domain;; Elongation factor Tu domain 2;; Elongation factor Tu domain 4	Elongation factor Tu, mitochondrial (Precursor; Fragment) OS=Gallus gallus (Chicken) PE=1 SV=1	hypothetical protein N338_11781, partial [Podiceps cristatus]
c103015.graph_c0	42	6.04652	0	0	6.56e-13	-5.86053	down	--	--	--	--	--	--	Peroxidase	--	--
c89556.graph_c0	42	2.27772	0	0	6.56e-13	-5.86053	down	[M]	Cell wall/membrane/envelope biogenesis	--	--	--	--	Peptidase family S41;; PDZ domain;; PDZ domain (Also known as DHR or GLGF)	--	PREDICTED: MAGUK p55 subfamily member 4-like, partial [Takifugu rubripes]
c107718.graph_c0	43	3.23928	0	0	3.12e-13	-5.8939	down	--	--	Molecular Function: binding (GO:0005488);;	K08057|1.34925e-84|dre:30248|calr, zgc:85636; calreticulin; K08057 calreticulin (A)	[O]	Posttranslational modification, protein turnover, chaperones	Calreticulin family	--	calreticulin precursor [Danio rerio]
c105930.graph_c0	43	2.98479	0	0	3.12e-13	-5.8939	down	[PR]	--	--	--	--	--	Rieske-like [2Fe-2S] domain	--	--
c104602.graph_c0	43	4.17083	0	0	3.12e-13	-5.8939	down	--	--	--	K15284|5.15535e-06|bfo:BRAFLDRAFT_208633|hypothetical protein; K15284 solute carrier family 35, member E2 (A)	[GE]	--	Triose-phosphate Transporter family;; EamA-like transporter family;; UAA transporter family	--	--
c110542.graph_c0	43	4.5052	0	0	3.12e-13	-5.8939	down	[O]	Posttranslational modification, protein turnover, chaperones	--	--	[O]	Posttranslational modification, protein turnover, chaperones	FtsH Extracellular	--	--
c114460.graph_c0	43	3.97127	0	0	3.12e-13	-5.8939	down	[R]	General function prediction only	--	K06997|7.0814e-63|isc:IscW_ISCW007157|proline synthetase associated protein, putative; K06997 (A)	[R]	General function prediction only	Alanine racemase, N-terminal domain	--	proline synthase co-transcribed bacterial homolog protein [Danio rerio]
c76805.graph_c0	43	7.77922	0	0	3.12e-13	-5.8939	down	[J]	Translation, ribosomal structure and biogenesis	--	--	[J]	Translation, ribosomal structure and biogenesis	Elongation factor Tu C-terminal domain	--	PREDICTED: LOW QUALITY PROTEIN: elongation factor Tu, mitochondrial [Aptenodytes forsteri]
c113647.graph_c0	45	3.21981	0	0	7.12e-14	-5.95841	down	[H]	Coenzyme transport and metabolism	--	K12504|1.28177e-58|lgi:LOTGIDRAFT_219858|hypothetical protein; K12504 decaprenyl-diphosphate synthase subunit 1 [EC:2.5.1.91] (A)	[H]	Coenzyme transport and metabolism	Polyprenyl synthetase	--	PREDICTED: decaprenyl-diphosphate synthase subunit 1 [Latimeria chalumnae]
c103378.graph_c0	45	2.76017	0	0	7.12e-14	-5.95841	down	[PR]	--	--	K14938|4.68221e-10|cmk:103183010|cholesterol desaturase daf-36-like; K14938 cholesterol 7-dehydrogenase [EC:1.3.1.21] (A)	--	--	Rieske [2Fe-2S] domain	--	PREDICTED: cholesterol desaturase daf-36-like, partial [Callorhinchus milii]
c123187.graph_c0	45	14.6431	0	0	7.12e-14	-5.95841	down	--	--	--	--	--	--	Ribulose-1,5-bisphosphate carboxylase small subunit	--	--
c123390.graph_c0	46	4.94336	0	0	3.41e-14	-5.98962	down	--	--	Cellular Component: photosystem II (GO:0009523);;	--	--	--	Photosystem II 10 kDa polypeptide PsbR	--	Photosystem II 10 kDa polypeptide, chloroplast [Salmo salar]
c108253.graph_c0	46	4.7796	0	0	3.41e-14	-5.98962	down	[J]	Translation, ribosomal structure and biogenesis	--	--	[J]	Translation, ribosomal structure and biogenesis	Elongation factor G C-terminus;; Elongation factor G, domain IV	Elongation factor G, mitochondrial {ECO:0000255|HAMAP-Rule:MF_03061} (Precursor) GN=gfm1 OS=Danio rerio (Zebrafish) PE=2 SV=1	PREDICTED: elongation factor G-2, chloroplastic-like, partial [Meleagris gallopavo]
c110911.graph_c0	46	3.4201	0	0	3.41e-14	-5.98962	down	[G]	Carbohydrate transport and metabolism	--	--	[G]	Carbohydrate transport and metabolism	Ribulose-phosphate 3 epimerase family;; PcrB family	--	PREDICTED: ribulose-phosphate 3-epimerase-like isoform X1 [Xiphophorus maculatus]
c76163.graph_c0	46	4.24833	0	0	3.41e-14	-5.98962	down	[O]	Posttranslational modification, protein turnover, chaperones	--	--	[O]	Posttranslational modification, protein turnover, chaperones	Hsp70 protein	Stress-70 protein, mitochondrial (Precursor) OS=Gallus gallus (Chicken) PE=1 SV=1	hypothetical protein N324_05005, partial [Chlamydotis macqueenii]
c108159.graph_c0	46	3.67724	0	0	3.41e-14	-5.98962	down	--	--	--	K15283|6.99177e-24|spu:585860|solute carrier family 35 member E1-like; K15283 solute carrier family 35, member E1 (A)	[GE]	--	EamA-like transporter family	--	PREDICTED: solute carrier family 35 member E1-like [Oryzias latipes]
c106849.graph_c0	46	4.12093	0	0	3.41e-14	-5.98962	down	--	--	--	--	--	--	Protein of unknown function (DUF3007)	--	--
c43843.graph_c0	47	8.15029	0	0	1.64e-14	-6.02016	down	--	--	--	--	--	--	Ribulose bisphosphate carboxylase, small chain	--	--
c112526.graph_c0	47	4.29641	0	0	1.64e-14	-6.02016	down	--	--	--	--	--	--	Protein of unknown function (DUF1517)	--	--
c110906.graph_c0	47	2.64967	0	0	1.64e-14	-6.02016	down	[S]	Function unknown	--	--	--	--	Uncharacterized protein family, UPF0114	--	--
c93850.graph_c0	48	2.02668	0	0	7.88e-15	-6.05007	down	[C]	Energy production and conversion	Molecular Function: malate dehydrogenase activity (GO:0016615);; Molecular Function: oxidoreductase activity, acting on the CH-OH group of donors, NAD or NADP as acceptor (GO:0016616);; Biological Process: cellular metabolic process (GO:0044237);; Biological Process: primary metabolic process (GO:0044238);; Biological Process: oxidation-reduction process (GO:0055114);; Biological Process: organic…	--	[C]	Energy production and conversion	lactate/malate dehydrogenase, alpha/beta C-terminal domain;; lactate/malate dehydrogenase, NAD binding domain	Malate dehydrogenase, cytoplasmic GN=mdh1 OS=Xenopus laevis (African clawed frog) PE=2 SV=1	cytosolic malate dehydrogenase B [Oryzias latipes]
c111407.graph_c0	48	3.19402	0	0	7.88e-15	-6.05007	down	[O]	Posttranslational modification, protein turnover, chaperones	--	K00799|2.50635e-18|lgi:LOTGIDRAFT_181794|hypothetical protein; K00799 glutathione S-transferase [EC:2.5.1.18] (A)	[O]	Posttranslational modification, protein turnover, chaperones	Glutathione S-transferase, N-terminal domain;; Glutathione S-transferase, N-terminal domain;; Glutathione S-transferase, N-terminal domain;; Glutathione S-transferase, C-terminal domain;; Glutathione S-transferase, C-terminal domain	--	--
c107985.graph_c0	49	2.71365	0	0	3.77e-15	-6.07937	down	[P]	Inorganic ion transport and metabolism	--	--	--	--	Peroxidase	--	--
c80006.graph_c0	49	4.99209	0	0	3.77e-15	-6.07937	down	--	--	--	K10601|3.69679e-09|dan:Dana_GF22986|GF22986 gene product from transcript GF22986-RA; K10601 E3 ubiquitin-protein ligase synoviolin [EC:6.3.2.19] (A)	[O]	Posttranslational modification, protein turnover, chaperones	Ring finger domain;; Zinc finger, C3HC4 type (RING finger);; Zinc finger, C3HC4 type (RING finger);; RING-H2 zinc finger;; Zinc finger, C3HC4 type (RING finger)	E3 ubiquitin-protein ligase synoviolin B (Precursor) GN=syvn1-b OS=Xenopus laevis (African clawed frog) PE=2 SV=1	PREDICTED: uncharacterized protein LOC102301173 [Haplochromis burtoni]
c109683.graph_c0	49	7.41129	0	0	3.77e-15	-6.07937	down	[P]	Inorganic ion transport and metabolism	--	--	--	--	Peroxidase	--	--
c104930.graph_c0	50	5.53439	0	0	1.78e-15	-6.10809	down	[E]	Amino acid transport and metabolism	Cellular Component: cytoplasm (GO:0005737);; Biological Process: nitrogen compound metabolic process (GO:0006807);; Molecular Function: ligase activity (GO:0016874);;	K01915|7.09486e-93|dmo:Dmoj_GI15717|GI15717 gene product from transcript GI15717-RA; K01915 glutamine synthetase [EC:6.3.1.2] (A)	[E]	Amino acid transport and metabolism	Glutamine synthetase, catalytic domain	Glutamine synthetase GN=GLUL OS=Gallus gallus (Chicken) PE=1 SV=1	PREDICTED: glutamine synthetase-like [Python bivittatus]
c100463.graph_c0	50	2.14139	0	0	1.78e-15	-6.10809	down	[E]	Amino acid transport and metabolism	--	--	[E]	Amino acid transport and metabolism	Conserved region in glutamate synthase;; Glutamate synthase central domain	--	--
c97557.graph_c0	50	3.46302	0	0	1.78e-15	-6.10809	down	--	--	--	--	--	--	Protein of unknown function (DUF1230)	--	--
c124135.graph_c0	50	4.04859	0	0	1.78e-15	-6.10809	down	--	--	--	--	--	--	Glycine rich protein family	--	--
c107837.graph_c0	50	2.0817	0	0	1.78e-15	-6.10809	down	[R]	General function prediction only	--	--	[G]	Carbohydrate transport and metabolism	Calcineurin-like phosphoesterase;; Iron/zinc purple acid phosphatase-like protein C	Iron/zinc purple acid phosphatase-like protein (Precursor) GN=papl OS=Danio rerio (Zebrafish) PE=2 SV=1	PREDICTED: iron/zinc purple acid phosphatase-like protein-like [Lepisosteus oculatus]
c112497.graph_c0	51	4.24738	0	0	8.88e-16	-6.13625	down	--	--	--	--	[K]	Transcription	CCT motif;; B-box zinc finger	--	--
c94871.graph_c0	51	4.99312	0	0	8.88e-16	-6.13625	down	--	--	--	--	--	--	Protein of unknown function (DUF1118)	--	--
c104508.graph_c0	53	2.42731	0	0	2.22e-16	-6.19097	down	--	--	--	--	--	--	Protein of unknown function (DUF760)	--	--
c107364.graph_c0	53	3.77929	0	0	2.22e-16	-6.19097	down	[G]	Carbohydrate transport and metabolism	--	--	[G]	Carbohydrate transport and metabolism	Ribose 5-phosphate isomerase A (phosphoriboisomerase A)	--	PREDICTED: ribose-5-phosphate isomerase-like [Oryzias latipes]
c101667.graph_c0	53	12.3249	0	0	2.22e-16	-6.19097	down	--	--	--	--	[C]	Energy production and conversion	ATP synthase	--	--
c116783.graph_c0	55	4.26622	0	0	0	-6.2437	down	--	--	--	--	--	--	N-terminal C2 in EEIG1 and EHBP1 proteins	--	--
c104103.graph_c0	55	5.49625	0	0	0	-6.2437	down	[MG]	--	--	--	--	--	--	--	--
c111452.graph_c0	55	4.50273	0	0	0	-6.2437	down	--	--	--	--	[R]	General function prediction only	Photosynthesis system II assembly factor YCF48	--	--
c116531.graph_c0	110	6.43559	1	0.0473269	0	-6.25054	down	[G]	Carbohydrate transport and metabolism	--	K03841|8.51454e-23|spu:577064|fructose-1,6-bisphosphatase 1-like; K03841 fructose-1,6-bisphosphatase I [EC:3.1.3.11] (A)	[G]	Carbohydrate transport and metabolism	Fructose-1-6-bisphosphatase	--	PREDICTED: LOW QUALITY PROTEIN: fructose-1,6-bisphosphatase 1-like [Poecilia reticulata]
c114749.graph_c0	56	3.45514	0	0	0	-6.26935	down	[G]	Carbohydrate transport and metabolism	Molecular Function: triose-phosphate isomerase activity (GO:0004807);; Cellular Component: cytosol (GO:0005829);; Biological Process: gluconeogenesis (GO:0006094);; Biological Process: glycolytic process (GO:0006096);; Biological Process: phosphate-containing compound metabolic process (GO:0006796);; Biological Process: multicellular organismal development (GO:0007275);; Biological Process: organ…	K01803|9.68819e-108|bacu:103006729|TPI1; triosephosphate isomerase 1; K01803 triosephosphate isomerase (TIM) [EC:5.3.1.1] (A)	[G]	Carbohydrate transport and metabolism	Triosephosphate isomerase	Triosephosphate isomerase GN=tpi1 OS=Xenopus tropicalis (Western clawed frog) PE=2 SV=1	unnamed protein product, partial [Tetraodon nigroviridis]
c100781.graph_c0	59	3.34421	0	0	0	-6.34369	down	--	--	--	--	[CR]	--	FHA domain	--	--
c107040.graph_c0	60	3.15833	0	0	0	-6.36764	down	--	--	--	--	--	--	Bifunctional nuclease	--	--
c115634.graph_c0	60	11.26	0	0	0	-6.36764	down	[G]	Carbohydrate transport and metabolism	--	K09864|4.03746e-31|ssc:407773|AQP1; aquaporin 1 (Colton blood group); K09864 aquaporin-1 (A)	[G]	Carbohydrate transport and metabolism	Major intrinsic protein	Aquaporin FA-CHIP GN=AQPA OS=Pelophylax esculentus (Edible frog) PE=2 SV=1	aquaporin 1 (Colton blood group) [Xenopus (Silurana) tropicalis]
c85467.graph_c0	61	6.79995	0	0	0	-6.3912	down	--	--	--	--	--	--	Protease inhibitor/seed storage/LTP family;; Probable lipid transfer	--	--
c110884.graph_c0	61	5.99087	0	0	0	-6.3912	down	--	--	--	--	--	--	Ribosomal protein S21	--	--
c104433.graph_c0	62	7.12672	0	0	0	-6.41438	down	[C]	Energy production and conversion	Molecular Function: (S)-2-hydroxy-acid oxidase activity (GO:0003973);; Molecular Function: binding (GO:0005488);; Biological Process: oxidation-reduction process (GO:0055114);;	K11517|1.75478e-73|gga:416728|HAO1; hydroxyacid oxidase (glycolate oxidase) 1 (EC:1.1.3.15); K11517 (S)-2-hydroxy-acid oxidase [EC:1.1.3.15] (A)	[C]	Energy production and conversion	FMN-dependent dehydrogenase	--	PREDICTED: hydroxyacid oxidase 1-like [Meleagris gallopavo]
c106287.graph_c0	1112	30.5586	17	0.377912	0	-6.42426	down	--	--	Biological Process: skeletal system development (GO:0001501);; Molecular Function: calcium ion binding (GO:0005509);; Cellular Component: extracellular space (GO:0005615);; Biological Process: positive regulation of bone mineralization (GO:0030501);; Biological Process: osteoclast maturation (GO:0036179);; Biological Process: regulation of fibroblast growth factor receptor signaling pathway (GO:0…	--	[S]	Function unknown	Protein of unknown function (DUF1193)	Glycosaminoglycan xylosylkinase {ECO:0000250|UniProtKB:O75063} GN=si:ch211-195o19.3 OS=Danio rerio (Zebrafish) PE=2 SV=1	PREDICTED: extracellular serine/threonine protein kinase FAM20C-like [Xenopus (Silurana) tropicalis]
c112410.graph_c0	63	3.60679	0	0	0	-6.4372	down	[I]	Lipid transport and metabolism	--	K10256|5.67867e-49|nve:NEMVE_v1g186588|hypothetical protein; K10256 omega-6 fatty acid desaturase (delta-12 desaturase) [EC:1.14.19.-] (A)	--	--	Fatty acid desaturase	--	--
c112279.graph_c0	63	2.71857	0	0	0	-6.4372	down	--	--	--	--	[G]	Carbohydrate transport and metabolism	NADH(P)-binding;; NmrA-like family	--	--
c111783.graph_c0	63	3.70311	0	0	0	-6.4372	down	[R]	General function prediction only	Molecular Function: organic cyclic compound binding (GO:0097159);; Molecular Function: heterocyclic compound binding (GO:1901363);;	K13126|2.94944e-22|dan:Dana_GF12652|GF12652 gene product from transcript GF12652-RA; K13126 polyadenylate-binding protein (A)	[R]	General function prediction only	RNA recognition motif. (a.k.a. RRM, RBD, or RNP domain);; RNA recognition motif (a.k.a. RRM, RBD, or RNP domain);; RNA recognition motif. (a.k.a. RRM, RBD, or RNP domain)	ELAV-like protein 2 OS=Xenopus tropicalis (Western clawed frog) PE=2 SV=2	ELAV-like 2, partial [Phaethon lepturus]
c114616.graph_c0	64	2.15071	0	0	0	-6.45966	down	--	--	--	K15630|2.58218e-49|nve:NEMVE_v1g209130|hypothetical protein; K15630 GDP-D-glucose phosphorylase [EC:2.7.7.78] (A)	[R]	General function prediction only	--	GDP-D-glucose phosphorylase 1 GN=gdpgp1 OS=Danio rerio (Zebrafish) PE=2 SV=1	PREDICTED: GDP-D-glucose phosphorylase 1-like [Oryzias latipes]
c110326.graph_c0	66	7.11703	0	0	0	-6.50355	down	--	--	--	--	--	--	Light regulated protein Lir1	--	--
c122810.graph_c0	199	50.181	2	0.40797	0	-6.52205	down	--	--	--	K09275|4.6837e-11|chx:102178671|TFCP2L1; transcription factor CP2-like 1; K09275 transcription factor CP2 and related proteins (A)	--	--	--	--	--
c113411.graph_c0	67	5.10239	0	0	0	-6.52501	down	[OC]	--	--	K03671|5.67078e-19|oaa:100076650|thioredoxin-like; K03671 thioredoxin 1 (A)	[O]	Posttranslational modification, protein turnover, chaperones	Thioredoxin	Thioredoxin GN=TXN OS=Gallus gallus (Chicken) PE=3 SV=2	PREDICTED: thioredoxin-like [Latimeria chalumnae]
c103425.graph_c0	68	4.95306	0	0	0	-6.54615	down	[C]	Energy production and conversion	--	K02137|8.64927e-10|fpg:101920641|ATP5O; ATP synthase, H+ transporting, mitochondrial F1 complex, O subunit; K02137 F-type H+-transporting ATPase subunit O (A)	[C]	Energy production and conversion	ATP synthase delta (OSCP) subunit	--	PREDICTED: ATP synthase subunit O, mitochondrial [Falco peregrinus]
c101878.graph_c0	68	14.6962	0	0	0	-6.54615	down	--	--	--	--	--	--	Chlorophyll A-B binding protein	--	--
c110916.graph_c0	70	7.56136	0	0	0	-6.58753	down	--	--	--	--	--	--	CAAD domains of cyanobacterial aminoacyl-tRNA synthetase	--	--
c123142.graph_c0	71	16.3291	0	0	0	-6.60779	down	[G]	Carbohydrate transport and metabolism	--	--	--	--	Ribulose bisphosphate carboxylase large chain, catalytic domain	--	--
c109041.graph_c0	72	4.36084	0	0	0	-6.62776	down	[R]	General function prediction only	Molecular Function: nucleic acid binding (GO:0003676);; Molecular Function: protein binding (GO:0005515);; Biological Process: gene expression (GO:0010467);; Biological Process: primary metabolic process (GO:0044238);; Biological Process: cellular macromolecule metabolic process (GO:0044260);;	K12831|3.40934e-20|aqu:100632716|uncharacterized LOC100632716; K12831 splicing factor 3B subunit 4 (A)	[R]	General function prediction only	RNA recognition motif. (a.k.a. RRM, RBD, or RNP domain);; RNA recognition motif (a.k.a. RRM, RBD, or RNP domain);; RNA recognition motif. (a.k.a. RRM, RBD, or RNP domain)	Embryonic polyadenylate-binding protein A GN=epabp-a OS=Xenopus laevis (African clawed frog) PE=1 SV=2	embryonic poly(A) binding protein [Xenopus laevis]
c106620.graph_c0	73	4.43137	0	0	0	-6.64746	down	--	--	--	--	--	--	Jacalin-like lectin domain	--	--
c113168.graph_c0	74	4.76735	0	0	0	-6.66689	down	[P]	Inorganic ion transport and metabolism	--	K03781|6.59886e-119|cel:CELE_Y54G11A.5|ctl-2; Protein CTL-2; K03781 catalase [EC:1.11.1.6] (A)	[P]	Inorganic ion transport and metabolism	Catalase	Catalase GN=cat OS=Glandirana rugosa (Japanese wrinkled frog) PE=2 SV=3	PREDICTED: catalase [Picoides pubescens]
c110384.graph_c0	75	6.58259	0	0	0	-6.68607	down	--	--	--	--	--	--	CAAD domains of cyanobacterial aminoacyl-tRNA synthetase	--	--
c109617.graph_c0	76	6.27535	0	0	0	-6.70499	down	[OC]	--	--	--	[O]	Posttranslational modification, protein turnover, chaperones	Thioredoxin;; Thioredoxin-like domain;; Thioredoxin-like	Thioredoxin GN=txn OS=Ictalurus punctatus (Channel catfish) PE=3 SV=1	PREDICTED: thioredoxin, mitochondrial [Esox lucius]
c101230.graph_c0	78	8.7105	0	0	0	-6.74211	down	[C]	Energy production and conversion	--	--	[C]	Energy production and conversion	ATP synthase	--	--
c110203.graph_c0	78	7.83212	0	0	0	-6.74211	down	--	--	--	--	--	--	Chlorophyll A-B binding protein	--	--
c112018.graph_c0	79	12.1988	0	0	0	-6.76032	down	--	--	--	--	--	--	Metallothionein	--	--
c87511.graph_c0	546611	12194.5	6944	125.316	0	-6.77454	down	--	--	--	--	[I]	Lipid transport and metabolism	Lipoprotein amino terminal region;; Domain of unknown function (DUF1943);; Domain of unknown function (DUF1944);; von Willebrand factor type D domain	Phosvitin (Precursor) OS=Xenopus laevis (African clawed frog) PE=1 SV=1	PREDICTED: vitellogenin-A2-like [Xenopus (Silurana) tropicalis]
c117508.graph_c0	80	3.31751	0	0	0	-6.7783	down	[GEPR]	--	--	K15378|1.39891e-31|ngi:103736001|Slc45a2; solute carrier family 45, member 2; K15378 solute carrier family 45, member 1/2/4 (A)	[G]	Carbohydrate transport and metabolism	MFS/sugar transport protein;; PUCC protein	--	solute carrier family 45, member 2 [Xenopus laevis]
c122608.graph_c0	325521	11867.3	4076	120.204	0	-6.79524	down	--	--	Molecular Function: lipid transporter activity (GO:0005319);; Biological Process: lipid transport (GO:0006869);;	--	[I]	Lipid transport and metabolism	Domain of unknown function (DUF1944);; von Willebrand factor type D domain	Phosvitin (Precursor) OS=Xenopus laevis (African clawed frog) PE=1 SV=1	PREDICTED: vitellogenin-A2-like [Xenopus (Silurana) tropicalis]
c112760.graph_c0	81	6.72361	0	0	0	-6.79606	down	--	--	--	--	--	--	Caleosin related protein	--	--
c108688.graph_c0	531569	9086.77	6645	91.8876	0	-6.79777	down	--	--	--	--	[I]	Lipid transport and metabolism	Lipoprotein amino terminal region;; Domain of unknown function (DUF1943)	Phosvitin (Precursor) OS=Xenopus laevis (African clawed frog) PE=1 SV=1	LOC100037071 protein [Xenopus laevis]
c111190.graph_c0	82	6.16243	0	0	0	-6.81361	down	--	--	--	--	--	--	RbcX protein	--	--
c106570.graph_c0	84	6.37381	0	0	0	-6.84807	down	--	--	--	--	--	--	SAP domain	--	--
c107734.graph_c0	85	4.32198	0	0	0	-6.86499	down	[E]	Amino acid transport and metabolism	--	K01738|3.35936e-126|cbr:CBG01953|Hypothetical protein CBG01953; K01738 cysteine synthase A [EC:2.5.1.47] (A)	[E]	Amino acid transport and metabolism	Pyridoxal-phosphate dependent enzyme	--	PREDICTED: cystathionine beta-synthase-like [Pundamilia nyererei]
c107301.graph_c0	85	10.4811	0	0	0	-6.86499	down	--	--	--	--	--	--	Manganese-stabilising protein / photosystem II polypeptide	--	--
c104772.graph_c1	86	14.71	0	0	0	-6.88172	down	--	--	--	--	--	--	Photosystem I reaction centre subunit III	--	--
c52146.graph_c0	86	8.56685	0	0	0	-6.88172	down	--	--	--	--	--	--	IEC3 subunit of the Ino80 complex, chromatin re-modelling	--	--
c109136.graph_c0	87	7.85563	0	0	0	-6.89826	down	[G]	Carbohydrate transport and metabolism	Molecular Function: transferase activity (GO:0016740);;	K00927|6.43548e-52|cel:CELE_T03F1.3|pgk-1; Protein PGK-1; K00927 phosphoglycerate kinase [EC:2.7.2.3] (A)	[G]	Carbohydrate transport and metabolism	Phosphoglycerate kinase	Phosphoglycerate kinase GN=PGK OS=Gallus gallus (Chicken) PE=2 SV=2	PREDICTED: phosphoglycerate kinase-like [Latimeria chalumnae]
c115615.graph_c0	87	6.66596	0	0	0	-6.89826	down	[E]	Amino acid transport and metabolism	Molecular Function: transferase activity (GO:0016740);;	K00605|9.74027e-80|cmk:103176711|amt; aminomethyltransferase; K00605 aminomethyltransferase [EC:2.1.2.10] (A)	[E]	Amino acid transport and metabolism	Aminomethyltransferase folate-binding domain;; Glycine cleavage T-protein C-terminal barrel domain	Aminomethyltransferase, mitochondrial (Precursor) GN=AMT OS=Gallus gallus (Chicken) PE=2 SV=2	PREDICTED: aminomethyltransferase, mitochondrial [Callorhinchus milii]
c111720.graph_c0	174	11.8165	1	0.0549352	0	-6.90859	down	--	--	--	--	--	--	Chlorophyll A-B binding protein	--	--
c118810.graph_c0	88	3.24587	0	0	0	-6.91461	down	[E]	Amino acid transport and metabolism	--	--	[E]	Amino acid transport and metabolism	GXGXG motif;; Conserved region in glutamate synthase	--	--
c112046.graph_c0	88	4.40841	0	0	0	-6.91461	down	--	--	--	--	[DO]	--	Caspase domain	--	--
c115412.graph_c0	2695	132.521	30	1.19332	0	-6.91733	down	[O]	Posttranslational modification, protein turnover, chaperones	--	--	[V]	Defense mechanisms	Serpin (serine protease inhibitor)	Serine protease inhibitor A6 (Precursor) GN=serpina6 OS=Xenopus laevis (African clawed frog) PE=2 SV=2	serine proteinase inhibitor, clade A, member 1 precursor [Xenopus (Silurana) tropicalis]
c116110.graph_c0	89	7.62997	0	0	0	-6.93078	down	--	--	--	--	--	--	Chlorophyll A-B binding protein	--	--
c107753.graph_c0	89	15.391	0	0	0	-6.93078	down	--	--	--	--	--	--	Chlorophyll A-B binding protein	--	--
c115139.graph_c0	89	3.41738	0	0	0	-6.93078	down	--	--	--	--	[O]	Posttranslational modification, protein turnover, chaperones	Papain family cysteine protease;; Cathepsin propeptide inhibitor domain (I29);; Granulin	Cathepsin L1 light chain (Fragments) GN=CTSL OS=Gallus gallus (Chicken) PE=1 SV=1	PREDICTED: cathepsin L-like isoform X1 [Latimeria chalumnae]
c119670.graph_c0	91	5.2675	0	0	0	-6.96258	down	--	--	Biological Process: transport (GO:0006810);; Cellular Component: membrane (GO:0016020);;	K15382|3.46357e-22|tru:101073069|sugar transporter SWEET1-like; K15382 solute carrier family 50 (sugar transporter) (A)	[R]	General function prediction only	Sugar efflux transporter for intercellular exchange;; PQ loop repeat	Sugar transporter SWEET1 GN=slc50a1 OS=Danio rerio (Zebrafish) PE=2 SV=2	PREDICTED: sugar transporter SWEET1-like [Takifugu rubripes]
c106604.graph_c0	93	7.97289	0	0	0	-6.99369	down	[F]	Nucleotide transport and metabolism	--	--	[TZ]	--	Phosphoribulokinase / Uridine kinase family	--	--
c97310.graph_c0	94	13.5951	0	0	0	-7.009	down	--	--	--	--	[P]	Inorganic ion transport and metabolism	Metallothionein	--	--
c116005.graph_c0	94	6.97649	0	0	0	-7.009	down	--	--	--	K13352|5.11308e-07|tad:TRIADDRAFT_63752|expressed hypothetical protein; K13352 peroxin-11B (A)	[U]	Intracellular trafficking, secretion, and vesicular transport	Peroxisomal biogenesis factor 11 (PEX11)	--	--
c102702.graph_c0	96	10.9248	0	0	0	-7.03914	down	--	--	--	--	--	--	Photosystem I psaG / psaK	--	--
c25972.graph_c0	97	14.3937	0	0	0	-7.05398	down	--	--	--	--	--	--	D5 N terminal like	--	--
c114632.graph_c0	100	5.95891	0	0	0	-7.0976	down	[R]	General function prediction only	Molecular Function: organic cyclic compound binding (GO:0097159);; Molecular Function: heterocyclic compound binding (GO:1901363);;	K13126|2.5011e-25|mmu:381404|Pabpc1l, 1810053B01Rik, Epab; poly(A) binding protein, cytoplasmic 1-like; K13126 polyadenylate-binding protein (A)	[R]	General function prediction only	RNA recognition motif. (a.k.a. RRM, RBD, or RNP domain);; RNA recognition motif (a.k.a. RRM, RBD, or RNP domain);; RNA recognition motif. (a.k.a. RRM, RBD, or RNP domain)	Embryonic polyadenylate-binding protein OS=Xenopus tropicalis (Western clawed frog) PE=2 SV=1	PREDICTED: polyadenylate-binding protein 4 isoform X3 [Latimeria chalumnae]
c111143.graph_c0	101	12.2969	0	0	0	-7.11185	down	--	--	--	--	--	--	Photosystem II protein Y (PsbY)	--	--
c111749.graph_c0	102	11.1137	0	0	0	-7.12596	down	--	--	--	--	--	--	Thylakoid soluble phosphoprotein TSP9	--	--
c98509.graph_c0	106	22.0358	0	0	0	-7.18107	down	[G]	Carbohydrate transport and metabolism	--	--	[G]	Carbohydrate transport and metabolism	Glyceraldehyde 3-phosphate dehydrogenase, NAD binding domain;; Glyceraldehyde 3-phosphate dehydrogenase, C-terminal domain	Glyceraldehyde-3-phosphate dehydrogenase GN=GAPDH OS=Coturnix coturnix japonica (Japanese quail) PE=2 SV=2	glyceraldehyde-3-phosphate dehydrogenase [Dasyatis sabina]
c111927.graph_c0	107	6.95403	0	0	0	-7.19452	down	[E]	Amino acid transport and metabolism	--	--	--	--	Aluminium induced protein;; Glutamine amidotransferase domain	--	--
c113138.graph_c0	108	12.2793	0	0	0	-7.20785	down	--	--	--	--	--	--	Chlorophyll A-B binding protein	--	--
c110258.graph_c0	108	4.36327	0	0	0	-7.20785	down	[T]	Signal transduction mechanisms	--	--	[J]	Translation, ribosomal structure and biogenesis	Elongation factor G C-terminus;; Elongation factor Tu domain 2	--	PREDICTED: elongation factor G, chloroplastic-like, partial [Meleagris gallopavo]
c116741.graph_c0	109	3.53602	0	0	0	-7.22106	down	[O]	Posttranslational modification, protein turnover, chaperones	Cellular Component: mitochondrial matrix (GO:0005759);; Biological Process: fin regeneration (GO:0031101);; Biological Process: cellular protein metabolic process (GO:0044267);;	--	[O]	Posttranslational modification, protein turnover, chaperones	TCP-1/cpn60 chaperonin family	60 kDa heat shock protein, mitochondrial (Precursor) OS=Gallus gallus (Chicken) PE=1 SV=1	PREDICTED: 60 kDa heat shock protein, mitochondrial-like [Neolamprologus brichardi]
c114859.graph_c0	112	10.7802	0	0	0	-7.25997	down	[E]	Amino acid transport and metabolism	Biological Process: glycine catabolic process (GO:0006546);;	K02437|3.03271e-40|mde:101896225|glycine cleavage system H protein, mitochondrial-like; K02437 glycine cleavage system H protein (A)	[E]	Amino acid transport and metabolism	Glycine cleavage H-protein	Glycine cleavage system H protein, mitochondrial (Precursor) GN=GCSH OS=Gallus gallus (Chicken) PE=1 SV=2	unnamed protein product [Oncorhynchus mykiss]
c112965.graph_c0	113	5.60929	0	0	0	-7.27271	down	--	--	--	--	--	--	ACT domain	--	--
c116728.graph_c0	114	6.03119	0	0	0	-7.28534	down	[O]	Posttranslational modification, protein turnover, chaperones	--	--	[O]	Posttranslational modification, protein turnover, chaperones	Peptidase family M41;; ATPase family associated with various cellular activities (AAA)	26S protease regulatory subunit 6A-B GN=psmc3-b OS=Xenopus laevis (African clawed frog) PE=2 SV=1	PREDICTED: AFG3-like protein 1 [Cynoglossus semilaevis]
c107426.graph_c0	114	11.4104	0	0	0	-7.28534	down	[C]	Energy production and conversion	Molecular Function: FMN binding (GO:0010181);; Molecular Function: oxidoreductase activity (GO:0016491);; Biological Process: oxidation-reduction process (GO:0055114);;	K11517|1.10019e-55|mde:101888820|peroxisomal (S)-2-hydroxy-acid oxidase GLO1-like; K11517 (S)-2-hydroxy-acid oxidase [EC:1.1.3.15] (A)	[C]	Energy production and conversion	FMN-dependent dehydrogenase;; IMP dehydrogenase / GMP reductase domain;; Conserved region in glutamate synthase;; Nitronate monooxygenase;; Thiazole biosynthesis protein ThiG	--	PREDICTED: hydroxyacid oxidase 2 [Cynoglossus semilaevis]
c118291.graph_c0	117	6.26648	0	0	0	-7.32258	down	--	--	--	K01611|3.85551e-50|phu:Phum_PHUM473090|S-adenosylmethionine decarboxylase, putative (EC:4.1.1.50); K01611 S-adenosylmethionine decarboxylase [EC:4.1.1.50] (A)	[T]	Signal transduction mechanisms	Adenosylmethionine decarboxylase;; S-adenosyl-l-methionine decarboxylase leader peptide	S-adenosylmethionine decarboxylase beta chain (Precursor) GN=amd1 OS=Xenopus laevis (African clawed frog) PE=2 SV=1	PREDICTED: S-adenosylmethionine decarboxylase proenzyme-like [Xiphophorus maculatus]
c113293.graph_c0	118	7.10569	0	0	0	-7.33478	down	--	--	--	K01373|1.56255e-82|hro:HELRODRAFT_157956|hypothetical protein; K01373 cathepsin F [EC:3.4.22.41] (A)	[O]	Posttranslational modification, protein turnover, chaperones	Papain family cysteine protease;; Cathepsin propeptide inhibitor domain (I29);; Peptidase C1-like family	Cathepsin L1 light chain (Fragments) GN=CTSL OS=Gallus gallus (Chicken) PE=1 SV=1	Cathepsin F precursor [Salmo salar]
c120111.graph_c0	237	36.783	1	0.125548	0	-7.35278	down	--	--	--	--	--	--	Chlorophyll A-B binding protein	--	--
c109776.graph_c0	120	10.4349	0	0	0	-7.35888	down	[P]	Inorganic ion transport and metabolism	Molecular Function: catalytic activity (GO:0003824);; Molecular Function: binding (GO:0005488);; Biological Process: cellular metabolic process (GO:0044237);; Biological Process: primary metabolic process (GO:0044238);; Biological Process: response to stimulus (GO:0050896);; Biological Process: organic substance metabolic process (GO:0071704);;	--	[P]	Inorganic ion transport and metabolism	Catalase;; Catalase-related immune-responsive	Catalase GN=cat OS=Glandirana rugosa (Japanese wrinkled frog) PE=2 SV=3	uncharacterized protein LOC100125664 [Xenopus laevis]
c110295.graph_c0	122	3.73194	0	0	0	-7.38258	down	--	--	--	K05853|9.0098e-30|xma:102222361|sarcoplasmic/endoplasmic reticulum calcium ATPase 2-like; K05853 Ca2+ transporting ATPase, sarcoplasmic/endoplasmic reticulum [EC:3.6.3.8] (A)	[P]	Inorganic ion transport and metabolism	haloacid dehalogenase-like hydrolase;; haloacid dehalogenase-like hydrolase	Sarcoplasmic/endoplasmic reticulum calcium ATPase 1 GN=ATP2A1 OS=Gallus gallus (Chicken) PE=2 SV=2	PREDICTED: sarcoplasmic/endoplasmic reticulum calcium ATPase 2-like isoform X2 [Poecilia reticulata]
c116609.graph_c0	125	19.8517	0	0	0	-7.41742	down	--	--	--	--	--	--	Chlorophyll A-B binding protein	--	--
c86741.graph_c0	130	21.2233	0	0	0	-7.47368	down	--	--	--	--	--	--	PsaD	--	--
c108080.graph_c0	130	13.3309	0	0	0	-7.47368	down	--	--	--	--	--	--	Photosystem I reaction centre subunit N (PSAN or PSI-N)	--	--
c118426.graph_c0	130	7.89263	0	0	0	-7.47368	down	[G]	Carbohydrate transport and metabolism	--	--	[G]	Carbohydrate transport and metabolism	Glycosyl hydrolases family 32 N-terminal domain;; Glycosyl hydrolases family 32 C terminal	--	--
c113685.graph_c0	134	9.83467	0	0	0	-7.51716	down	[Q]	Secondary metabolites biosynthesis, transport and catabolism	--	K00515|9.23826e-07|bfo:BRAFLDRAFT_99974|hypothetical protein; K00515 beta-carotene 15,15'-monooxygenase [EC:1.14.99.36] (A)	[Q]	Secondary metabolites biosynthesis, transport and catabolism	Retinal pigment epithelial membrane protein	--	--
c117235.graph_c0	134	9.76044	0	0	0	-7.51716	down	[R]	General function prediction only	--	--	--	--	CBS domain	--	--
c112026.graph_c0	136	14.8182	0	0	0	-7.53841	down	--	--	--	--	--	--	Protease inhibitor/seed storage/LTP family;; Probable lipid transfer	--	--
c117880.graph_c0	138	5.60655	0	0	0	-7.55936	down	--	--	Cellular Component: intracellular part (GO:0044424);;	--	--	--	Lipoxygenase;; PLAT/LH2 domain	--	uncharacterized protein LOC724056 [Danio rerio]
c101176.graph_c0	140	7.94979	0	0	0	-7.58001	down	[RTKL]	--	--	K08816|2.66623e-16|cel:CELE_F28B12.3|vrk-1; Protein VRK-1; K08816 vaccinia related kinase [EC:2.7.11.1] (A)	[T]	Signal transduction mechanisms	Protein kinase domain	Serine/threonine-protein kinase VRK1 GN=vrk1 OS=Danio rerio (Zebrafish) PE=2 SV=1	Serine/threonine-protein kinase VRK1, partial [Pterocles gutturalis]
c109713.graph_c0	141	15.0325	0	0	0	-7.59023	down	[E]	Amino acid transport and metabolism	Molecular Function: catalytic activity (GO:0003824);; Biological Process: cellular amino acid metabolic process (GO:0006520);;	K00281|9.75769e-31|xtr:100497481|gldc; glycine dehydrogenase (decarboxylating); K00281 glycine dehydrogenase [EC:1.4.4.2] (A)	[E]	Amino acid transport and metabolism	Glycine cleavage system P-protein	Glycine dehydrogenase (decarboxylating), mitochondrial (Precursor) GN=GLDC OS=Gallus gallus (Chicken) PE=1 SV=2	PREDICTED: glycine dehydrogenase [decarboxylating], mitochondrial [Xenopus (Silurana) tropicalis]
c108877.graph_c0	142	11.0282	0	0	0	-7.60037	down	[E]	Amino acid transport and metabolism	Molecular Function: catalytic activity (GO:0003824);; Biological Process: glycine metabolic process (GO:0006544);;	K00281|2.12785e-70|oaa:100076326|GLDC; glycine dehydrogenase (decarboxylating); K00281 glycine dehydrogenase [EC:1.4.4.2] (A)	[E]	Amino acid transport and metabolism	--	Glycine dehydrogenase (decarboxylating), mitochondrial (Precursor) GN=GLDC OS=Gallus gallus (Chicken) PE=1 SV=2	PREDICTED: glycine dehydrogenase (decarboxylating), mitochondrial-like, partial [Balearica regulorum gibbericeps]
c119031.graph_c0	145	6.63106	0	0	0	-7.63038	down	[G]	Carbohydrate transport and metabolism	Molecular Function: phosphoric ester hydrolase activity (GO:0042578);;	K03841|1.73689e-130|ocu:100008863|FBP1; fructose-1,6-bisphosphatase 1; K03841 fructose-1,6-bisphosphatase I [EC:3.1.3.11] (A)	[G]	Carbohydrate transport and metabolism	Fructose-1-6-bisphosphatase	--	PREDICTED: fructose-1,6-bisphosphatase 1-like [Xiphophorus maculatus]
c104245.graph_c0	150	15.9828	0	0	0	-7.67905	down	--	--	--	--	--	--	Chlorophyll A-B binding protein	--	--
c115604.graph_c0	173	8.7504	0	0	0	-7.88392	down	[C]	Energy production and conversion	--	--	[C]	Energy production and conversion	Aldo/keto reductase family	Alcohol dehydrogenase [NADP(+)] A GN=akr1a1a OS=Danio rerio (Zebrafish) PE=2 SV=2	PREDICTED: uncharacterized oxidoreductase At1g06690, chloroplastic-like isoform X2 [Esox lucius]
c120046.graph_c0	184	4.02217	0	0	0	-7.97249	down	[H]	Coenzyme transport and metabolism	--	--	--	--	CobN/Magnesium Chelatase	--	--
c120183.graph_c0	185	8.38695	0	0	0	-7.98028	down	[MG]	--	--	--	--	--	NAD dependent epimerase/dehydratase family;; NADH(P)-binding;; RmlD substrate binding domain	--	--
c115651.graph_c0	186	8.87821	0	0	0	-7.98802	down	[O]	Posttranslational modification, protein turnover, chaperones	Molecular Function: binding (GO:0005488);;	--	[O]	Posttranslational modification, protein turnover, chaperones	Peptidase family M41;; ATPase family associated with various cellular activities (AAA);; AAA domain (dynein-related subfamily)	26S protease regulatory subunit 7 GN=psmc2 OS=Xenopus laevis (African clawed frog) PE=2 SV=1	PREDICTED: AFG3-like protein 2 isoform X1 [Oreochromis niloticus]
c121124.graph_c0	188	6.39882	0	0	0	-8.00339	down	[G]	Carbohydrate transport and metabolism	--	--	[G]	Carbohydrate transport and metabolism	Glycosyl hydrolases family 32 N-terminal domain;; Glycosyl hydrolases family 32 C terminal	--	--
c103548.graph_c0	193	18.3514	0	0	0	-8.04111	down	[F]	Nucleotide transport and metabolism	--	K00876|2.82672e-15|cbr:CBG03314|Hypothetical protein CBG03314; K00876 uridine kinase [EC:2.7.1.48] (A)	[TZ]	--	Phosphoribulokinase / Uridine kinase family	Uridine-cytidine kinase 2-B GN=uck2b OS=Danio rerio (Zebrafish) PE=2 SV=1	PREDICTED: uridine-cytidine kinase 2 isoform X2 [Python bivittatus]
c109329.graph_c0	194	22.9733	0	0	0	-8.04854	down	--	--	Cellular Component: photosystem II oxygen evolving complex (GO:0009654);; Biological Process: photosynthesis (GO:0015979);; Cellular Component: thylakoid membrane (GO:0042651);;	--	--	--	Photosystem II 10 kDa polypeptide PsbR	--	Photosystem II 10 kDa polypeptide, chloroplast [Salmo salar]
c113039.graph_c0	199	15.251	0	0	0	-8.08512	down	--	--	--	--	--	--	ABA/WDS induced protein	--	--
c117841.graph_c0	201	10.0652	0	0	0	-8.09949	down	[C]	Energy production and conversion	Biological Process: carbohydrate metabolic process (GO:0005975);; Cellular Component: membrane (GO:0016020);; Molecular Function: malate dehydrogenase activity (GO:0016615);; Molecular Function: oxidoreductase activity, acting on the CH-OH group of donors, NAD or NADP as acceptor (GO:0016616);; Cellular Component: intracellular membrane-bounded organelle (GO:0043231);; Biological Process: cellula…	K00026|1.52419e-122|aqu:100641593|malate dehydrogenase, mitochondrial-like; K00026 malate dehydrogenase [EC:1.1.1.37] (A)	[C]	Energy production and conversion	lactate/malate dehydrogenase, alpha/beta C-terminal domain;; lactate/malate dehydrogenase, NAD binding domain	--	PREDICTED: malate dehydrogenase, mitochondrial isoform X1 [Pseudopodoces humilis]
c114931.graph_c0	201	15.9359	0	0	0	-8.09949	down	[C]	Energy production and conversion	Molecular Function: binding (GO:0005488);; Molecular Function: oxidoreductase activity (GO:0016491);;	K00411|2.80073e-09|xma:102232877|cytochrome b-c1 complex subunit Rieske, mitochondrial-like; K00411 ubiquinol-cytochrome c reductase iron-sulfur subunit [EC:1.10.2.2] (A)	[C]	Energy production and conversion	Cytochrome B6-F complex Fe-S subunit;; Rieske [2Fe-2S] domain	Cytochrome b-c1 complex subunit Rieske, mitochondrial (Precursor) GN=UQCRFS1 OS=Gallus gallus (Chicken) PE=1 SV=1	PREDICTED: cytochrome b-c1 complex subunit Rieske, mitochondrial-like [Oreochromis niloticus]
c118855.graph_c0	211	10.5407	0	0	0	-8.16929	down	[E]	Amino acid transport and metabolism	Molecular Function: catalytic activity (GO:0003824);; Biological Process: glycine metabolic process (GO:0006544);;	K00281|3.49839e-178|hmg:100209748|gldc; glycine dehydrogenase (decarboxylating); K00281 glycine dehydrogenase [EC:1.4.4.2] (A)	[E]	Amino acid transport and metabolism	Glycine cleavage system P-protein;; Beta-eliminating lyase	Glycine dehydrogenase (decarboxylating), mitochondrial (Precursor) GN=GLDC OS=Gallus gallus (Chicken) PE=1 SV=2	PREDICTED: glycine dehydrogenase [decarboxylating], mitochondrial-like [Maylandia zebra]
c114998.graph_c0	213	23.1144	0	0	0	-8.18285	down	--	--	--	--	--	--	Photosystem II reaction centre W protein (PsbW)	--	--
c112379.graph_c0	213	18.3357	0	0	0	-8.18285	down	[C]	Energy production and conversion	--	--	--	--	ATP synthase B/B' CF(0)	--	--
c108843.graph_c0	214	20.5664	0	0	0	-8.18959	down	--	--	--	--	--	--	Photosystem I reaction centre subunit IV / PsaE	--	--
c118476.graph_c0	217	9.50122	0	0	0	-8.2096	down	--	--	--	K01366|2.9795e-104|ssc:396969|CTSH; cathepsin H (EC:3.4.22.16); K01366 cathepsin H [EC:3.4.22.16] (A)	[O]	Posttranslational modification, protein turnover, chaperones	Papain family cysteine protease;; Cathepsin propeptide inhibitor domain (I29);; Peptidase C1-like family	Cathepsin L1 light chain (Fragments) GN=CTSL OS=Gallus gallus (Chicken) PE=1 SV=1	PREDICTED: pro-cathepsin H [Alligator sinensis]
c119635.graph_c0	219	9.76601	0	0	0	-8.22279	down	[E]	Amino acid transport and metabolism	--	--	[R]	General function prediction only	Aminotransferase class-V	--	Serine--pyruvate aminotransferase, mitochondrial precursor [Anoplopoma fimbria]
c112656.graph_c0	220	20.5756	0	0	0	-8.22935	down	[C]	Energy production and conversion	--	K02639|8.04296e-19|bfo:BRAFLDRAFT_126940|hypothetical protein; K02639 ferredoxin (A)	--	--	2Fe-2S iron-sulfur cluster binding domain	--	--
c119432.graph_c0	223	8.89759	0	0	0	-8.24882	down	[E]	Amino acid transport and metabolism	--	K01915|2.58747e-132|lgi:LOTGIDRAFT_230064|hypothetical protein; K01915 glutamine synthetase [EC:6.3.1.2] (A)	[E]	Amino acid transport and metabolism	Glutamine synthetase, catalytic domain;; Glutamine synthetase, beta-Grasp domain	Glutamine synthetase GN=GLUL OS=Gallus gallus (Chicken) PE=1 SV=1	PREDICTED: glutamine synthetase [Chrysemys picta bellii]
c119071.graph_c0	240	10.4102	0	0	0	-8.35448	down	[CHR]	--	--	--	[C]	Energy production and conversion	D-isomer specific 2-hydroxyacid dehydrogenase, NAD binding domain;; D-isomer specific 2-hydroxyacid dehydrogenase, catalytic domain	C-terminal-binding protein 2 GN=ctbp2 OS=Xenopus laevis (African clawed frog) PE=1 SV=1	PREDICTED: glyoxylate reductase/hydroxypyruvate reductase-like [Lepisosteus oculatus]
c117125.graph_c0	244	11.8648	0	0	0	-8.37825	down	[G]	Carbohydrate transport and metabolism	Biological Process: MAPK cascade (GO:0000165);; Molecular Function: fructose-bisphosphate aldolase activity (GO:0004332);; Molecular Function: MAP kinase activity (GO:0004707);; Cellular Component: cytosol (GO:0005829);; Biological Process: gluconeogenesis (GO:0006094);; Biological Process: glycolytic process (GO:0006096);; Biological Process: response to stress (GO:0006950);; Biological Process:…	K01623|3.76245e-142|aqu:100640992|fructose-bisphosphate aldolase-like; K01623 fructose-bisphosphate aldolase, class I [EC:4.1.2.13] (A)	[G]	Carbohydrate transport and metabolism	Fructose-bisphosphate aldolase class-I	Fructose-bisphosphate aldolase C GN=aldoc OS=Carassius auratus (Goldfish) PE=2 SV=2	PREDICTED: fructose-bisphosphate aldolase A [Chrysemys picta bellii]
c118904.graph_c0	251	12.4169	0	0	0	-8.41894	down	[H]	Coenzyme transport and metabolism	--	--	[R]	General function prediction only	Thi4 family;; FAD dependent oxidoreductase;; FAD binding domain;; NAD(P)-binding Rossmann-like domain;; GMC oxidoreductase	--	--
c116103.graph_c0	252	18.6478	0	0	0	-8.42465	down	--	--	--	--	--	--	Photosystem I reaction centre subunit XI	--	--
c121181.graph_c0	257	6.79754	0	0	0	-8.45292	down	--	--	--	K13411|4.27805e-25|spu:588656|duox1, Udx1; dual oxidase 1 (EC:1.6.3.1); K13411 dual oxidase [EC:1.6.3.1 1.11.1.-] (A)	[PQ]	--	FAD-binding domain;; Ferric reductase like transmembrane component;; Ferric reductase NAD binding domain;; Oxidoreductase NAD-binding domain	--	PREDICTED: cytochrome b-245 heavy chain-like [Latimeria chalumnae]
c106141.graph_c0	258	27.351	0	0	0	-8.4585	down	--	--	--	--	--	--	CP12 domain	--	--
c111218.graph_c0	263	27.2142	0	0	0	-8.48612	down	--	--	--	--	--	--	Photosystem I reaction centre subunit VI	--	--
c118687.graph_c0	264	10.7909	0	0	0	-8.49158	down	[E]	Amino acid transport and metabolism	Biological Process: one-carbon metabolic process (GO:0006730);; Biological Process: serine family amino acid metabolic process (GO:0009069);; Molecular Function: transferase activity (GO:0016740);;	K00600|0|lcm:102355076|SHMT2; serine hydroxymethyltransferase 2 (mitochondrial); K00600 glycine hydroxymethyltransferase [EC:2.1.2.1] (A)	[E]	Amino acid transport and metabolism	Serine hydroxymethyltransferase	--	PREDICTED: serine hydroxymethyltransferase, mitochondrial isoform X1 [Latimeria chalumnae]
c121279.graph_c0	268	7.69522	0	0	0	-8.51321	down	[G]	Carbohydrate transport and metabolism	--	--	[G]	Carbohydrate transport and metabolism	Transketolase, thiamine diphosphate binding domain;; Transketolase, pyrimidine binding domain;; Transketolase, C-terminal domain	--	PREDICTED: transketolase-like [Astyanax mexicanus]
c111186.graph_c0	269	29.5146	0	0	0	-8.51857	down	--	--	--	--	--	--	Manganese-stabilising protein / photosystem II polypeptide	--	--
c118905.graph_c0	277	10.4632	0	0	0	-8.56074	down	[E]	Amino acid transport and metabolism	--	K00814|3.77405e-150|nve:NEMVE_v1g236165|hypothetical protein; K00814 alanine transaminase [EC:2.6.1.2] (A)	[E]	Amino acid transport and metabolism	Aminotransferase class I and II	Alanine aminotransferase 2-like GN=gpt2l OS=Danio rerio (Zebrafish) PE=2 SV=2	PREDICTED: alanine aminotransferase 2-like isoform X3 [Python bivittatus]
c115245.graph_c0	278	18.7171	0	0	0	-8.56592	down	--	--	--	--	--	--	Ribosome inactivating protein	--	--
c107166.graph_c0	281	23.8619	0	0	0	-8.58137	down	--	--	--	--	--	--	Oxygen evolving enhancer protein 3 (PsbQ)	--	--
c20631.graph_c0	295	17.3481	0	0	0	-8.65133	down	--	--	--	--	--	--	--	--	PREDICTED: uncharacterized protein LOC102345338 [Latimeria chalumnae]
c110015.graph_c0	309	35.389	0	0	0	-8.71806	down	--	--	--	--	--	--	Photosystem II reaction centre X protein (PsbX)	--	--
c112955.graph_c0	315	16.3955	0	0	0	-8.74574	down	--	--	--	K03671|2.91763e-08|dme:Dmel_CG31884|Trx-2; thioredoxin-2; K03671 thioredoxin 1 (A)	[O]	Posttranslational modification, protein turnover, chaperones	Thioredoxin	--	PREDICTED: thioredoxin-like isoform X2 [Maylandia zebra]
c114289.graph_c0	320	28.0461	0	0	0	-8.76841	down	--	--	--	--	--	--	Chlorophyll A-B binding protein	--	--
c113113.graph_c0	332	20.6261	0	0	0	-8.8214	down	--	--	--	--	--	--	PsbP	--	--
c120129.graph_c0	354	10.9813	0	0	0	-8.91377	down	[O]	Posttranslational modification, protein turnover, chaperones	--	--	[O]	Posttranslational modification, protein turnover, chaperones	AAA domain (Cdc48 subfamily);; Clp amino terminal domain;; ATPase family associated with various cellular activities (AAA);; C-terminal, D2-small domain, of ClpB protein;; AAA domain (dynein-related subfamily);; AAA ATPase domain;; Sigma-54 interaction domain;; AAA domain;; AAA domain;; UvrB/uvrC motif;; AAA domain;; AAA domain;; IstB-like ATP binding protein;; Zeta toxin;; 50S ribosome-binding G…	--	PREDICTED: chaperone protein ClpB-like, partial [Taeniopygia guttata]
c120235.graph_c0	361	21.0242	0	0	0	-8.94196	down	[P]	Inorganic ion transport and metabolism	Molecular Function: binding (GO:0005488);; Biological Process: response to wounding (GO:0009611);; Biological Process: response to bacterium (GO:0009617);; Molecular Function: oxidoreductase activity (GO:0016491);; Biological Process: biological regulation (GO:0065007);;	--	[C]	Energy production and conversion	Oxidoreductase NAD-binding domain;; Oxidoreductase FAD-binding domain;; FAD binding domain	NADPH-dependent diflavin oxidoreductase 1 {ECO:0000255|HAMAP-Rule:MF_03178} GN=ndor1 OS=Danio rerio (Zebrafish) PE=2 SV=1	PREDICTED: NADPH--cytochrome P450 reductase isoform X1 [Danio rerio]
c114431.graph_c0	382	21.6426	0	0	0	-9.02337	down	--	--	--	--	--	--	Chlorophyll A-B binding protein	--	--
c110474.graph_c0	416	50.1618	0	0	0	-9.14616	down	[R]	General function prediction only	Molecular Function: organic cyclic compound binding (GO:0097159);; Molecular Function: heterocyclic compound binding (GO:1901363);;	K13195|1.85085e-21|bfo:BRAFLDRAFT_71461|hypothetical protein; K13195 cold-inducible RNA-binding protein (A)	[R]	General function prediction only	RNA recognition motif. (a.k.a. RRM, RBD, or RNP domain);; RNA recognition motif (a.k.a. RRM, RBD, or RNP domain);; RNA recognition motif. (a.k.a. RRM, RBD, or RNP domain)	Cold-inducible RNA-binding protein {ECO:0000303|PubMed:10817911} OS=Lithobates catesbeiana (American bullfrog) PE=2 SV=1	PREDICTED: glycine-rich RNA-binding protein GRP1A-like, partial [Haliaeetus albicilla]
c119772.graph_c0	457	17.8871	0	0	0	-9.28154	down	[G]	Carbohydrate transport and metabolism	Biological Process: nuclear membrane fusion (GO:0000740);; Molecular Function: glyceraldehyde-3-phosphate dehydrogenase (NAD+) (phosphorylating) activity (GO:0004365);; Molecular Function: binding (GO:0005488);; Cellular Component: cytosol (GO:0005829);; Cellular Component: cytoskeleton (GO:0005856);; Biological Process: gluconeogenesis (GO:0006094);; Biological Process: glycolytic process (GO:00…	--	[G]	Carbohydrate transport and metabolism	Glyceraldehyde 3-phosphate dehydrogenase, C-terminal domain;; Glyceraldehyde 3-phosphate dehydrogenase, NAD binding domain;; CP12 domain	Glyceraldehyde-3-phosphate dehydrogenase GN=GAPDH OS=Columba livia (Domestic pigeon) PE=2 SV=3	PREDICTED: glyceraldehyde-3-phosphate dehydrogenase-like [Maylandia zebra]
c101210.graph_c0	481	29.8239	0	0	0	-9.35527	down	--	--	--	--	--	--	SAP domain	--	--
c86719.graph_c0	559	31.5709	0	0	0	-9.57177	down	--	--	--	--	--	--	Zinc finger C-x8-C-x5-C-x3-H type (and similar)	--	--
c119817.graph_c0	1143	81.3582	1	0.0575794	0	-9.6191	down	--	--	--	--	--	--	Chlorophyll A-B binding protein	--	--
c107620.graph_c0	601	68.9569	0	0	0	-9.67616	down	--	--	Cellular Component: photosynthetic membrane (GO:0034357);;	--	--	--	Photosystem II 10 kDa polypeptide PsbR	--	Photosystem II 10 kDa polypeptide, chloroplast [Salmo salar]
c116973.graph_c0	618	37.5029	0	0	0	-9.71635	down	--	--	--	--	--	--	Chlorophyll A-B binding protein	--	--
c114360.graph_c0	712	31.0877	0	0	0	-9.92039	down	[G]	Carbohydrate transport and metabolism	Biological Process: somitogenesis (GO:0001756);; Biological Process: thigmotaxis (GO:0001966);; Molecular Function: catalytic activity (GO:0003824);; Biological Process: axonogenesis (GO:0007409);; Biological Process: brain development (GO:0007420);; Biological Process: pigmentation (GO:0043473);;	K01623|3.65254e-119|cbr:CBG09060|Hypothetical protein CBG09060; K01623 fructose-bisphosphate aldolase, class I [EC:4.1.2.13] (A)	[G]	Carbohydrate transport and metabolism	Fructose-bisphosphate aldolase class-I	Fructose-bisphosphate aldolase, muscle type OS=Lampetra japonica (Japanese lamprey) PE=2 SV=1	aldolase A [Danio rerio]
c114468.graph_c0	746	49.8519	0	0	0	-9.98762	down	[P]	Inorganic ion transport and metabolism	--	--	[P]	Inorganic ion transport and metabolism	Carbonic anhydrase	--	--
c120255.graph_c0	768	40.157	0	0	0	-10.0295	down	[C]	Energy production and conversion	Molecular Function: (S)-2-hydroxy-acid oxidase activity (GO:0003973);; Molecular Function: binding (GO:0005488);; Biological Process: oxidation-reduction process (GO:0055114);;	K11517|3.70605e-132|fab:101820799|HAO1; hydroxyacid oxidase (glycolate oxidase) 1; K11517 (S)-2-hydroxy-acid oxidase [EC:1.1.3.15] (A)	[C]	Energy production and conversion	FMN-dependent dehydrogenase;; IMP dehydrogenase / GMP reductase domain	--	PREDICTED: hydroxyacid oxidase 1 [Ficedula albicollis]
c113218.graph_c0	780	49.025	0	0	0	-10.0519	down	--	--	--	--	--	--	Chlorophyll A-B binding protein	--	--
c114492.graph_c0	2039	78.5812	0	0	0	-11.4373	down	--	--	--	--	[O]	Posttranslational modification, protein turnover, chaperones	ATPase family associated with various cellular activities (AAA)	--	--
c121594.graph_c0	4458	358.34	0	0	0	-12.5656	down	--	--	--	--	--	--	Ribulose bisphosphate carboxylase, small chain;; Ribulose-1,5-bisphosphate carboxylase small subunit	--	--

## Sheet: AF-vs-TF DEG
#ID	AF_count	AF_FPKM	TF_count	TF_FPKM	FDR	log2FC	regulated
c100038.graph_c0	20	2.22554	0	0	0.000180286	-4.14687	down
c100047.graph_c0	169	4.45682	1266	31.472	5.9692e-11	2.59712	up
c100152.graph_c0	33	5.38046	0	0	1.65659e-07	-4.83689	down
c100196.graph_c0	18	2.3488	0	0	0.000584137	-4.00389	down
c100204.graph_c0	18	3.72956	0	0	0.000584137	-4.00389	down
c100316.graph_c0	4	0.419789	169	16.719	1.44329e-15	4.73628	up
c100330.graph_c0	20	2.36392	0	0	0.000180286	-4.14687	down
c100337.graph_c0	31	3.40132	0	0	4.54657e-07	-4.74995	down
c100406.graph_c0	24	2.06883	0	0	1.87049e-05	-4.39627	down
c100455.graph_c0	22	2.06371	0	0	5.72739e-05	-4.27695	down
c100463.graph_c0	50	2.14139	0	0	6.78987e-11	-5.41909	down
c100465.graph_c0	4	0.161084	40	1.51846	0.00143969	2.69697	up
c100469.graph_c0	19	2.28009	0	0	0.000323325	-4.07715	down
c100488.graph_c0	42	2.68922	0	0	2.26871e-09	-5.17396	down
c100489.graph_c0	34	2.04546	2	0.113421	7.00331e-06	-3.64087	down
c100513.graph_c0	109	13.9619	29	3.50161	1.55549e-05	-2.15405	down
c100598.graph_c0	17	1.3154	1	0.0729389	0.00688884	-3.17908	down
c100609.graph_c0	26	3.47957	0	0	6.27195e-06	-4.50646	down
c100624.graph_c0	41	3.31129	0	0	3.58564e-09	-5.14017	down
c100628.graph_c0	78	2.88477	584	20.3602	4.12401e-10	2.58653	up
c100636.graph_c0	0	0	26	1.91293	0.000372267	4.22148	up
c100656.graph_c0	16	2.31935	0	0	0.00194985	-3.84516	down
c100674.graph_c0	23	2.41379	0	0	3.26206e-05	-4.33784	down
c100683.graph_c0	30	1.59253	0	0	7.59518e-07	-4.70443	down
c100698.graph_c0	142	9.54005	30	1.89992	9.01328e-08	-2.48538	down
c100698.graph_c1	1868	32.4617	572	9.37005	2.83032e-07	-2.00418	down
c100781.graph_c0	59	3.34421	0	0	1.75282e-12	-5.65272	down
c100791.graph_c0	27	2.83833	0	0	3.66649e-06	-4.55856	down
c100796.graph_c0	40	5.50588	0	0	5.69275e-09	-5.10556	down
c100830.graph_c0	27	2.57902	0	0	3.66649e-06	-4.55856	down
c100839.graph_c0	28	2.61481	0	0	2.15657e-06	-4.60884	down
c100973.graph_c0	3618	99.5629	857	22.2311	2.01311e-10	-2.37539	down
c100990.graph_c0	3200	108.404	637	20.3417	8.33111e-13	-2.62547	down
c101051.graph_c1	21	7.89829	0	0	0.000101257	-4.21338	down
c101104.graph_c0	253	18.612	1301	90.2196	5.37888e-07	2.05768	up
c101165.graph_c0	918	13.3189	166	2.27031	1.80522e-13	-2.75601	down
c101176.graph_c0	140	7.94979	0	0	0	-6.88267	down
c101183.graph_c0	28	2.49591	0	0	2.15657e-06	-4.60884	down
c101202.graph_c0	36	7.55899	0	0	3.7917e-08	-4.95821	down
c101210.graph_c0	481	29.8239	0	0	0	-8.65459	down
c101230.graph_c0	78	8.7105	0	0	1.77636e-15	-6.04848	down
c101231.graph_c0	0	0	27	4.03439	0.000246648	4.27306	up
c101246.graph_c0	0	0	21	2.92362	0.00311915	3.93165	up
c101299.graph_c0	23	4.05571	0	0	3.26206e-05	-4.33784	down
c101328.graph_c0	0	0	245	11.9959	0	7.38684	up
c101330.graph_c0	27	6.09787	0	0	3.66649e-06	-4.55856	down
c101409.graph_c0	25	2.91643	663	72.9082	0	4.3652	up
c101480.graph_c0	0	0	25	2.2206	0.000564361	4.16798	up
c101488.graph_c0	17	2.08801	0	0	0.00106324	-3.92671	down
c101602.graph_c0	36	2.79243	0	0	3.7917e-08	-4.95821	down
c101623.graph_c0	24	1.87554	0	0	1.87049e-05	-4.39627	down
c101656.graph_c0	2709	46.922	169	2.75934	0	-4.29035	down
c101667.graph_c0	53	12.3249	0	0	1.94358e-11	-5.50124	down
c101684.graph_c0	27	2.39656	0	0	3.66649e-06	-4.55856	down
c101868.graph_c0	161	7.25175	4	0.169835	0	-5.18891	down
c101878.graph_c0	68	14.6962	0	0	5.90639e-14	-5.85374	down
c101880.graph_c0	67	13.7012	9	1.73492	3.01006e-07	-3.00263	down
c101895.graph_c0	19	3.28572	2	0.32603	0.00975095	-2.83955	down
c101898.graph_c0	28	2.4575	0	0	2.15657e-06	-4.60884	down
c101911.graph_c0	62	9.24382	4	0.562174	2.83336e-09	-3.82909	down
c102044.graph_c0	20	2.17915	0	0	0.000180286	-4.14687	down
c102115.graph_c0	5	0.419478	41	3.24246	0.0031274	2.47744	up
c102151.graph_c0	32	2.29751	0	0	2.73691e-07	-4.79407	down
c102178.graph_c0	580	21.1211	3497	120.043	9.69439e-09	2.29007	up
c102216.graph_c0	18	2.21953	0	0	0.000584137	-4.00389	down
c102234.graph_c0	9382	260.329	1950	51.0051	4.68037e-12	-2.56508	down
c102284.graph_c0	112	5.59891	22	1.03671	1.82505e-07	-2.56934	down
c102351.graph_c0	16	2.47369	0	0	0.00194985	-3.84516	down
c102359.graph_c0	1	0.0246514	89	2.06816	1.34893e-11	5.06461	up
c102427.graph_c1	18	2.83175	0	0	0.000584137	-4.00389	down
c102460.graph_c0	25	2.14912	0	0	1.07965e-05	-4.45242	down
c102484.graph_c0	70	3.38374	19	0.865774	0.000254909	-2.09767	down
c102498.graph_c0	22	2.13062	3	0.273877	0.00752013	-2.67426	down
c102513.graph_c0	32	3.31396	7	0.683356	0.00533672	-2.2697	down
c102587.graph_c0	117	10.4443	916	77.0801	3.80503e-11	2.65692	up
c102601.graph_c0	41	5.20391	0	0	3.58564e-09	-5.14017	down
c102638.graph_c0	114	7.2402	12	0.71842	3.429e-11	-3.39555	down
c102663.graph_c0	0	0	41	1.71495	1.18124e-06	4.85002	up
c102702.graph_c0	96	10.9248	0	0	0	-6.34395	down
c102741.graph_c0	1	0.0952291	44	3.94979	4.3397e-06	4.07212	up
c102763.graph_c1	211	12.3056	41	2.25401	1.24926e-09	-2.62035	down
c102808.graph_c0	23	4.03304	0	0	3.26206e-05	-4.33784	down
c102816.graph_c0	35	3.23005	0	0	6.16667e-08	-4.91889	down
c102836.graph_c0	20	4.98322	0	0	0.000180286	-4.14687	down
c102871.graph_c0	40	2.82978	0	0	5.69275e-09	-5.10556	down
c102914.graph_c0	16	1.54003	0	0	0.00194985	-3.84516	down
c102931.graph_c0	35	2.90142	0	0	6.16667e-08	-4.91889	down
c103015.graph_c0	42	6.04652	0	0	2.26871e-09	-5.17396	down
c103050.graph_c0	77	4.83161	6	0.354898	4.2037e-10	-3.68697	down
c103058.graph_c0	44	2.02102	6	0.259789	2.47207e-05	-2.89607	down
c103086.graph_c0	0	0	24	2.70976	0.000859435	4.11243	up
c103106.graph_c0	0	0	50	2.32128	5.44331e-08	5.12729	up
c103156.graph_c0	254	17.4572	48	3.10981	2.03353e-10	-2.66647	down
c103173.graph_c0	28	1.98532	0	0	2.15657e-06	-4.60884	down
c103265.graph_c0	2	0.427864	30	6.0499	0.00291102	2.99995	up
c103270.graph_c0	22	1.56876	0	0	5.72739e-05	-4.27695	down
c103315.graph_c0	36	2.61765	4	0.27417	5.31518e-05	-3.06441	down
c103334.graph_c0	30	3.38636	2	0.212811	4.44849e-05	-3.46682	down
c103378.graph_c0	45	2.76017	0	0	5.89976e-10	-5.27083	down
c103425.graph_c0	68	4.95306	0	0	5.90639e-14	-5.85374	down
c103430.graph_c0	29	6.92319	0	0	1.27608e-06	-4.65742	down
c103474.graph_c0	25	2.23804	0	0	1.07965e-05	-4.45242	down
c103486.graph_c0	16	2.32472	0	0	0.00194985	-3.84516	down
c103501.graph_c0	22	2.35614	2	0.201911	0.00215622	-3.03935	down
c103508.graph_c0	21	2.39633	0	0	0.000101257	-4.21338	down
c103548.graph_c0	193	18.3514	0	0	0	-7.34249	down
c103550.graph_c0	25	2.4063	0	0	1.07965e-05	-4.45242	down
c103552.graph_c0	38	4.85754	0	0	1.45511e-08	-5.03377	down
c103605.graph_c1	45	5.40021	9	1.0181	0.000302481	-2.44071	down
c103629.graph_c1	76	1.62122	19	0.382062	6.31227e-05	-2.2144	down
c103636.graph_c0	22	3.41817	0	0	5.72739e-05	-4.27695	down
c103673.graph_c0	24	4.16738	0	0	1.87049e-05	-4.39627	down
c103696.graph_c0	23	2.09487	0	0	3.26206e-05	-4.33784	down
c103743.graph_c0	70	10.2418	0	0	2.85327e-14	-5.89485	down
c103751.graph_c0	249	11.4961	26	1.13155	1.22125e-15	-3.48655	down
c103765.graph_c0	190	6.40896	37	1.17649	2.72511e-09	-2.61271	down
c103769.graph_c0	34	2.00886	0	0	1.00808e-07	-4.87848	down
c103776.graph_c0	203	8.64096	60	2.40751	4.2242e-06	-2.0315	down
c103834.graph_c0	2	0.202118	49	4.6679	5.69368e-06	3.68135	up
c103836.graph_c0	11	1.21169	62	6.43785	0.00276875	2.0801	up
c103893.graph_c0	0	0	50	3.02713	5.44331e-08	5.12729	up
c104026.graph_c0	16	1.13575	0	0	0.00194985	-3.84516	down
c104103.graph_c0	55	5.49625	0	0	8.59657e-12	-5.55352	down
c104105.graph_c0	35	1.3631	9	0.330411	0.00837633	-2.08878	down
c104131.graph_c0	6	0.615274	71	6.8632	4.11531e-06	3.0325	up
c104159.graph_c0	20	3.11515	0	0	0.000180286	-4.14687	down
c104172.graph_c0	4786	86.6787	711	12.1384	0	-3.04783	down
c104208.graph_c0	25	1.97584	0	0	1.07965e-05	-4.45242	down
c104245.graph_c0	150	15.9828	0	0	0	-6.98139	down
c104246.graph_c0	38	3.14181	0	0	1.45511e-08	-5.03377	down
c104305.graph_c0	23	2.47592	0	0	3.26206e-05	-4.33784	down
c104314.graph_c0	27	2.30213	0	0	3.66649e-06	-4.55856	down
c104321.graph_c0	26	2.45361	0	0	6.27195e-06	-4.50646	down
c104368.graph_c0	21	2.20021	0	0	0.000101257	-4.21338	down
c104433.graph_c0	62	7.12672	0	0	5.50449e-13	-5.72289	down
c104444.graph_c0	0	0	25	2.40092	0.000564361	4.16798	up
c104459.graph_c0	42	4.08014	0	0	2.26871e-09	-5.17396	down
c104461.graph_c0	50	2.40768	0	0	6.78987e-11	-5.41909	down
c104508.graph_c0	53	2.42731	0	0	1.94358e-11	-5.50124	down
c104543.graph_c0	41	2.11733	0	0	3.58564e-09	-5.14017	down
c104553.graph_c0	98	21.9748	0	0	0	-6.37333	down
c104561.graph_c0	20	4.6682	0	0	0.000180286	-4.14687	down
c104574.graph_c0	0	0	28	3.57813	0.000164133	4.32286	up
c104602.graph_c0	43	4.17083	0	0	1.44185e-09	-5.20697	down
c104624.graph_c0	17	3.03179	0	0	0.00106324	-3.92671	down
c104675.graph_c0	44	1.57479	661	22.3009	0	3.57402	up
c104739.graph_c0	27	2.55182	0	0	3.66649e-06	-4.55856	down
c104772.graph_c1	86	14.71	0	0	1.11022e-16	-6.18731	down
c104826.graph_c0	0	0	25	2.56773	0.000564361	4.16798	up
c104874.graph_c0	17	1.94342	1	0.107763	0.00688884	-3.17908	down
c104880.graph_c0	470	17.5318	76	2.67234	1.1946e-13	-2.90413	down
c104882.graph_c0	19	2.73533	0	0	0.000323325	-4.07715	down
c104930.graph_c0	50	5.53439	0	0	6.78987e-11	-5.41909	down
c104963.graph_c0	76	8.55569	2	0.212238	6.38045e-13	-4.77397	down
c104973.graph_c0	34	2.32406	0	0	1.00808e-07	-4.87848	down
c104982.graph_c0	30	2.43229	0	0	7.59518e-07	-4.70443	down
c104988.graph_c0	40	4.20768	10	0.991594	0.0032941	-2.14388	down
c105001.graph_c0	2	0.142984	60	4.04352	2.22182e-07	3.9658	up
c105104.graph_c0	4	0.309887	34	2.48298	0.00868635	2.47152	up
c105133.graph_c0	38	2.03268	0	0	1.45511e-08	-5.03377	down
c105144.graph_c0	17	1.68542	0	0	0.00106324	-3.92671	down
c105191.graph_c0	25	1.77663	0	0	1.07965e-05	-4.45242	down
c105246.graph_c1	2	0.248077	33	3.85853	0.00102908	3.1313	up
c105247.graph_c0	24	4.17339	0	0	1.87049e-05	-4.39627	down
c105283.graph_c0	29	2.7082	5	0.440153	0.0028878	-2.52151	down
c105287.graph_c0	0	0	20	1.81186	0.00483655	3.86598	up
c105293.graph_c0	31	3.37768	0	0	4.54657e-07	-4.74995	down
c105375.graph_c0	10	1.12377	55	5.8263	0.00611378	2.03494	up
c105378.graph_c0	27	1.66424	0	0	3.66649e-06	-4.55856	down
c105392.graph_c0	41	3.33707	0	0	3.58564e-09	-5.14017	down
c105397.graph_c0	57	3.96096	12	0.786065	8.06622e-05	-2.41046	down
c105474.graph_c0	53	4.31377	13	0.997416	0.000516135	-2.20443	down
c105555.graph_c0	31	3.14295	0	0	4.54657e-07	-4.74995	down
c105636.graph_c0	55	6.44816	0	0	8.59657e-12	-5.55352	down
c105676.graph_c0	29	3.42439	0	0	1.27608e-06	-4.65742	down
c105678.graph_c0	334	10.6479	43	1.29222	5.10703e-15	-3.21358	down
c105713.graph_c0	5	0.58409	41	4.51486	0.0031274	2.47744	up
c105714.graph_c0	1	0.0404006	45	1.71377	3.11828e-06	4.10351	up
c105717.graph_c0	22	2.03631	0	0	5.72739e-05	-4.27695	down
c105746.graph_c0	32	3.29763	0	0	2.73691e-07	-4.79407	down
c105761.graph_c0	3	0.452661	34	4.83595	0.00281961	2.77987	up
c105774.graph_c0	23	2.15108	0	0	3.26206e-05	-4.33784	down
c105787.graph_c0	34	2.43831	0	0	1.00808e-07	-4.87848	down
c105817.graph_c0	28	2.51018	0	0	2.15657e-06	-4.60884	down
c105859.graph_c0	2	0.237735	32	3.58563	0.00145229	3.08883	up
c105888.graph_c0	1	0.0597594	28	1.5773	0.0012712	3.4465	up
c105928.graph_c0	3	0.342956	32	3.44841	0.00537953	2.69615	up
c105930.graph_c0	43	2.98479	0	0	1.44185e-09	-5.20697	down
c105949.graph_c0	0	0	256	10.2097	0	7.44983	up
c105955.graph_c0	25	1.7528	0	0	1.07965e-05	-4.45242	down
c105967.graph_c0	39	4.07251	0	0	9.07997e-09	-5.07011	down
c105979.graph_c0	0	0	48	9.98529	1.0561e-07	5.07011	up
c105997.graph_c0	36	5.73543	0	0	3.7917e-08	-4.95821	down
c106029.graph_c0	121	5.87621	3982	182.291	0	4.72719	up
c106043.graph_c0	11	0.689058	281	16.5928	0	4.23401	up
c106086.graph_c0	17	2.54366	0	0	0.00106324	-3.92671	down
c106125.graph_c0	24	1.7451	0	0	1.87049e-05	-4.39627	down
c106141.graph_c0	258	27.351	0	0	0	-7.75902	down
c106153.graph_c0	133	8.91631	26	1.64308	4.31485e-08	-2.58784	down
c106175.graph_c0	35	2.80505	0	0	6.16667e-08	-4.91889	down
c106283.graph_c0	33	4.0139	0	0	1.65659e-07	-4.83689	down
c106287.graph_c0	1112	30.5586	79	2.04648	0	-4.08963	down
c106352.graph_c0	0	0	22	2.75775	0.00202048	3.99446	up
c106358.graph_c0	56	3.45514	0	0	5.74729e-12	-5.57897	down
c106378.graph_c0	26	2.71501	0	0	6.27195e-06	-4.50646	down
c106390.graph_c0	75	2.71371	12	0.409294	5.30473e-07	-2.79925	down
c106404.graph_c0	23	3.1762	0	0	3.26206e-05	-4.33784	down
c106507.graph_c0	62	2.41015	8	0.293153	4.88515e-07	-3.03756	down
c106557.graph_c0	20	1.48173	0	0	0.000180286	-4.14687	down
c106568.graph_c0	0	0	40	1.64405	1.68927e-06	4.81564	up
c106570.graph_c0	84	6.37381	0	0	2.22045e-16	-6.15384	down
c106586.graph_c0	35	2.80505	5	0.37774	0.000256877	-2.78298	down
c106604.graph_c0	93	7.97289	0	0	0	-6.29872	down
c106620.graph_c0	73	4.43137	0	0	9.99201e-15	-5.95439	down
c106664.graph_c0	21	2.15698	0	0	0.000101257	-4.21338	down
c106675.graph_c0	273	33.6959	0	0	0	-7.84018	down
c106700.graph_c0	26	2.63177	4	0.381668	0.00370107	-2.61266	down
c106701.graph_c0	7	0.213607	49	1.4095	0.00242468	2.32285	up
c106705.graph_c1	0	0	19	1.87338	0.00753094	3.79718	up
c106728.graph_c0	46	5.2206	0	0	3.79785e-10	-5.30172	down
c106741.graph_c0	35	2.11373	2	0.113858	4.45389e-06	-3.68129	down
c106746.graph_c0	68	7.48714	4	0.415163	3.70288e-10	-3.95994	down
c106746.graph_c1	196	10.3943	51	2.54954	4.83362e-07	-2.20956	down
c106803.graph_c0	73	4.09337	759	40.1191	7.26086e-14	3.05791	up
c106849.graph_c0	46	4.12093	0	0	3.79785e-10	-5.30172	down
c106889.graph_c2	18	2.18517	1	0.114436	0.00396341	-3.25626	down
c106890.graph_c0	53	3.87171	4	0.275447	7.0233e-08	-3.60744	down
c106894.graph_c0	6	0.588344	44	4.0671	0.00358909	2.36006	up
c106938.graph_c0	59	4.8696	4	0.31121	8.084e-09	-3.75892	down
c106943.graph_c0	137	5.56715	1	0.0383057	0	-6.10406	down
c106947.graph_c0	6	0.332577	62	3.23955	3.58703e-05	2.8412	up
c106951.graph_c0	10	0.935254	58	5.11339	0.00319467	2.10961	up
c106974.graph_c0	34	0.824757	836	19.1163	0	4.27298	up
c106993.graph_c0	2	0.0622108	71	2.08183	1.09856e-08	4.20329	up
c107040.graph_c0	60	3.15833	0	0	1.18761e-12	-5.67649	down
c107073.graph_c0	3	0.106041	37	1.23283	0.00108163	2.897	up
c107118.graph_c0	27	3.89599	0	0	3.66649e-06	-4.55856	down
c107121.graph_c0	0	0	21	2.15862	0.00311915	3.93165	up
c107162.graph_c0	21	3.13843	0	0	0.000101257	-4.21338	down
c107162.graph_c1	103	10.0999	16	1.47894	1.62027e-08	-2.87569	down
c107166.graph_c0	281	23.8619	0	0	0	-7.88167	down
c107170.graph_c0	57	4.2683	2	0.141176	5.12536e-10	-4.36637	down
c107224.graph_c0	73	2.63982	19	0.647675	0.000126575	-2.15721	down
c107254.graph_c0	90	2.88828	26	0.786542	0.000130331	-2.03054	down
c107261.graph_c0	46	1.74177	12	0.428316	0.00201621	-2.1082	down
c107266.graph_c0	0	0	38	1.90474	3.4902e-06	4.74434	up
c107301.graph_c0	85	10.4811	0	0	1.11022e-16	-6.17067	down
c107304.graph_c0	30	2.90091	0	0	7.59518e-07	-4.70443	down
c107306.graph_c0	87	4.9808	12	0.647609	2.28005e-08	-3.01025	down
c107354.graph_c0	53	4.71965	14	1.1752	0.000985966	-2.10804	down
c107361.graph_c0	28	1.90563	3	0.192465	0.000472306	-3.00615	down
c107364.graph_c0	53	3.77929	0	0	1.94358e-11	-5.50124	down
c107412.graph_c0	44	2.19982	5	0.235643	7.79427e-06	-3.10334	down
c107426.graph_c0	114	11.4104	0	0	0	-6.58907	down
c107444.graph_c0	2	0.201284	61	5.7871	1.67469e-07	3.98908	up
c107488.graph_c0	34	3.28264	0	0	1.00808e-07	-4.87848	down
c107492.graph_c0	20	1.8033	0	0	0.000180286	-4.14687	down
c107493.graph_c0	25	2.39162	3	0.270536	0.00186656	-2.84972	down
c107499.graph_c0	32	2.97949	0	0	2.73691e-07	-4.79407	down
c107521.graph_c0	0	0	19	1.65778	0.00753094	3.79718	up
c107530.graph_c0	24	0.986773	165	6.39501	1.05637e-06	2.42443	up
c107558.graph_c0	235	12.9686	70	3.64146	2.85105e-06	-2.02408	down
c107568.graph_c0	72	1.75627	15	0.344906	1.24775e-05	-2.45126	down
c107611.graph_c0	2	0.0703237	221	7.32513	0	5.82141	up
c107620.graph_c0	601	68.9569	0	0	0	-8.9752	down
c107654.graph_c0	39	3.33436	0	0	9.07997e-09	-5.07011	down
c107679.graph_c0	0	0	25	0.999738	0.000564361	4.16798	up
c107718.graph_c0	43	3.23928	0	0	1.44185e-09	-5.20697	down
c107729.graph_c0	2	0.0775546	131	4.78851	1.83187e-14	5.07347	up
c107734.graph_c0	85	4.32198	0	0	1.11022e-16	-6.17067	down
c107753.graph_c0	89	15.391	0	0	0	-6.23611	down
c107799.graph_c0	26	3.19343	0	0	6.27195e-06	-4.50646	down
c107811.graph_c1	93	9.14278	7	0.648701	1.70497e-11	-3.77434	down
c107837.graph_c0	50	2.0817	0	0	6.78987e-11	-5.41909	down
c107893.graph_c0	0	0	25	1.87671	0.000564361	4.16798	up
c107920.graph_c0	1	0.068654	41	2.65339	1.18908e-05	3.97366	up
c107946.graph_c0	4992	307.46	1265	73.444	1.74234e-09	-2.27871	down
c107985.graph_c0	49	2.71365	0	0	1.03805e-10	-5.39063	down
c108039.graph_c0	139	4.2499	991	28.562	3.13688e-10	2.52402	up
c108080.graph_c0	130	13.3309	0	0	0	-6.7767	down
c108086.graph_c0	64	5.42738	0	0	2.58238e-13	-5.76784	down
c108114.graph_c0	28	2.17189	5	0.365596	0.00434222	-2.47292	down
c108159.graph_c0	46	3.67724	0	0	3.79785e-10	-5.30172	down
c108179.graph_c0	20	6.24347	1	0.294271	0.0013279	-3.39924	down
c108241.graph_c0	15	1.48012	125	11.6269	6.49674e-07	2.66551	up
c108248.graph_c0	20	1.78027	2	0.167817	0.00588497	-2.90927	down
c108248.graph_c1	28	2.44382	2	0.164548	0.00011475	-3.37124	down
c108253.graph_c0	46	4.7796	0	0	3.79785e-10	-5.30172	down
c108270.graph_c0	42	3.00516	0	0	2.26871e-09	-5.17396	down
c108284.graph_c0	6	0.239321	170	6.3919	3.475e-14	4.27497	up
c108317.graph_c0	31	3.37768	4	0.410836	0.0004314	-2.85615	down
c108319.graph_c0	17	2.43067	0	0	0.00106324	-3.92671	down
c108366.graph_c0	24	3.58208	125	17.5868	0.000169431	2.02797	up
c108418.graph_c0	99	5.09412	17	0.824582	8.66184e-08	-2.73893	down
c108441.graph_c0	121	18.9407	26	3.8365	3.69762e-07	-2.45269	down
c108478.graph_c0	6	0.21113	46	1.52583	0.0021183	2.42216	up
c108502.graph_c1	7	0.387322	44	2.29498	0.00847446	2.17235	up
c108506.graph_c0	47	2.07088	8	0.332275	6.45548e-05	-2.64665	down
c108536.graph_c0	1	0.0825704	33	2.56856	0.000198376	3.67258	up
c108583.graph_c0	36	2.69255	0	0	3.7917e-08	-4.95821	down
c108609.graph_c0	44	3.29876	0	0	9.20343e-10	-5.23925	down
c108659.graph_c0	21	1.72646	211	16.352	7.12646e-10	2.95931	up
c108663.graph_c0	173	9.44978	34	1.75068	6.35243e-09	-2.5955	down
c108678.graph_c0	36	4.17636	8	0.874856	0.00283949	-2.27288	down
c108682.graph_c0	113	9.97359	11	0.915202	1.47891e-11	-3.49424	down
c108688.graph_c0	531569	9086.77	44463	716.473	0	-3.8791	down
c108695.graph_c0	2	0.093928	159	7.03904	2.22045e-16	5.35011	up
c108704.graph_c0	0	0	43	2.25876	5.83329e-07	4.9164	up
c108705.graph_c0	1	0.0623119	57	3.34809	7.20169e-08	4.43489	up
c108710.graph_c0	0	0	70	4.48843	1.26494e-10	5.60087	up
c108744.graph_c0	29	3.13257	0	0	1.27608e-06	-4.65742	down
c108799.graph_c0	42	5.05955	0	0	2.26871e-09	-5.17396	down
c108836.graph_c0	0	0	45	3.31496	2.9177e-07	4.97986	up
c108843.graph_c0	214	20.5664	0	0	0	-7.49062	down
c108847.graph_c0	91	6.93854	2	0.14375	5.88418e-15	-5.03015	down
c108877.graph_c0	142	11.0282	0	0	0	-6.90297	down
c108896.graph_c0	143	20.0352	0	0	0	-6.91301	down
c108897.graph_c0	6	0.572243	58	5.21445	9.68283e-05	2.74729	up
c108903.graph_c0	21	3.13843	0	0	0.000101257	-4.21338	down
c108922.graph_c0	93	4.6068	18	0.840505	6.86096e-07	-2.57378	down
c108963.graph_c0	2	0.148173	30	2.09513	0.00291102	2.99995	up
c108972.graph_c0	48	1.7082	4	0.134187	4.56025e-07	-3.4678	down
c108980.graph_c0	30	2.95095	0	0	7.59518e-07	-4.70443	down
c108997.graph_c0	48	7.55135	10	1.48298	0.000258965	-2.39991	down
c109009.graph_c0	18	2.19793	0	0	0.000584137	-4.00389	down
c109010.graph_c0	56	11.3409	3	0.572705	4.72026e-09	-3.97628	down
c109018.graph_c0	32	2.35409	4	0.277385	0.000282409	-2.90027	down
c109041.graph_c0	72	4.36084	0	0	1.40998e-14	-5.93482	down
c109136.graph_c0	87	7.85563	0	0	1.11022e-16	-6.20376	down
c109178.graph_c0	25	3.20882	0	0	1.07965e-05	-4.45242	down
c109179.graph_c0	19	1.90477	0	0	0.000323325	-4.07715	down
c109191.graph_c0	12185	168.33	351	4.57084	0	-5.41115	down
c109214.graph_c0	23	2.03575	0	0	3.26206e-05	-4.33784	down
c109226.graph_c0	16	3.81969	0	0	0.00194985	-3.84516	down
c109243.graph_c0	39	3.6045	0	0	9.07997e-09	-5.07011	down
c109275.graph_c0	32	2.53867	178	13.3115	1.38052e-05	2.1351	up
c109310.graph_c0	35	2.73857	3	0.221273	2.11838e-05	-3.3162	down
c109329.graph_c0	194	22.9733	0	0	0	-7.3499	down
c109358.graph_c0	41	2.38427	0	0	3.58564e-09	-5.14017	down
c109447.graph_c0	1	0.104772	43	4.24683	6.05593e-06	4.04004	up
c109455.graph_c1	34	6.29627	4	0.698258	0.000121902	-2.98467	down
c109506.graph_c0	5	0.372633	37	2.59935	0.00964331	2.33474	up
c109511.graph_c0	9	0.388635	65	2.64584	0.000317543	2.40512	up
c109515.graph_c1	8	0.708087	57	4.75579	0.000833465	2.36904	up
c109550.graph_c1	18	2.24602	1	0.117623	0.00396341	-3.25626	down
c109605.graph_c0	435	14.4997	109	3.42491	9.38792e-09	-2.28085	down
c109613.graph_c0	30	3.55257	5	0.558139	0.00192227	-2.56851	down
c109616.graph_c0	1	0.0477869	50	2.25232	6.21262e-07	4.25093	up
c109617.graph_c0	76	6.27535	0	0	3.44169e-15	-6.01158	down
c109618.graph_c0	202	14.0216	39	2.55188	1.49797e-09	-2.62742	down
c109625.graph_c0	0	0	29	3.46966	0.000109691	4.371	up
c109642.graph_c0	43	12.3861	0	0	1.44185e-09	-5.20697	down
c109683.graph_c0	49	7.41129	0	0	1.03805e-10	-5.39063	down
c109713.graph_c0	141	15.0325	0	0	0	-6.89286	down
c109721.graph_c0	61	8.57829	12	1.59076	2.56375e-05	-2.50636	down
c109742.graph_c0	2	0.210599	38	3.77192	0.000190253	3.3267	up
c109776.graph_c0	120	10.4349	0	0	0	-6.66232	down
c109796.graph_c0	38	2.27519	0	0	1.45511e-08	-5.03377	down
c109805.graph_c0	0	0	25	2.99417	0.000564361	4.16798	up
c109834.graph_c0	38	2.51792	0	0	1.45511e-08	-5.03377	down
c109852.graph_c0	40	4.814	0	0	5.69275e-09	-5.10556	down
c109858.graph_c0	48	5.17602	0	0	1.59317e-10	-5.3616	down
c109888.graph_c0	34	2.8601	8	0.634371	0.00570589	-2.19315	down
c109912.graph_c0	42	3.73591	0	0	2.26871e-09	-5.17396	down
c109940.graph_c0	83	5.15137	24	1.40413	0.000201825	-2.02437	down
c109972.graph_c0	100	7.73762	17	1.23996	6.93167e-08	-2.75326	down
c109981.graph_c0	0	0	64	3.8668	7.06983e-10	5.47437	up
c109995.graph_c0	55	2.8841	13	0.642602	0.000293284	-2.25671	down
c110015.graph_c0	309	35.389	0	0	0	-8.01815	down
c110031.graph_c0	27	2.65419	5	0.463329	0.00653228	-2.42264	down
c110129.graph_c0	26	2.61071	0	0	6.27195e-06	-4.50646	down
c110150.graph_c0	16	1.71064	0	0	0.00194985	-3.84516	down
c110200.graph_c0	50	2.21238	0	0	6.78987e-11	-5.41909	down
c110203.graph_c0	78	7.83212	0	0	1.77636e-15	-6.04848	down
c110229.graph_c0	5	0.399257	42	3.16143	0.00236389	2.51101	up
c110253.graph_c1	52	2.09038	284	10.762	2.69648e-06	2.12439	up
c110258.graph_c0	108	4.36327	0	0	0	-6.5119	down
c110295.graph_c0	122	3.73194	0	0	0	-6.68593	down
c110301.graph_c0	104	5.67936	30	1.54432	6.03753e-05	-2.04048	down
c110326.graph_c0	66	7.11703	0	0	1.22569e-13	-5.81143	down
c110347.graph_c0	1	0.0562748	25	1.32619	0.00401813	3.29163	up
c110357.graph_c0	57	4.1157	10	0.680645	1.58985e-05	-2.64229	down
c110365.graph_c0	18	2.47765	1	0.129753	0.00396341	-3.25626	down
c110377.graph_c0	109	8.42362	31	2.25832	3.90963e-05	-2.06234	down
c110384.graph_c0	75	6.58259	0	0	4.88498e-15	-5.99277	down
c110389.graph_c0	1292	98.6307	0	0	0	-10.0778	down
c110393.graph_c0	82	2.38066	17	0.465247	4.32887e-06	-2.47069	down
c110400.graph_c0	38	3.19042	193	15.2747	3.63158e-05	2.01121	up
c110408.graph_c0	0	0	33	2.85403	2.28013e-05	4.54893	up
c110421.graph_c0	24	2.10643	0	0	1.87049e-05	-4.39627	down
c110442.graph_c0	4	0.312671	44	3.24214	0.000444973	2.82981	up
c110468.graph_c0	38	2.52688	4	0.250734	2.34176e-05	-3.13997	down
c110474.graph_c0	416	50.1618	0	0	0	-8.4457	down
c110512.graph_c0	44	5.17138	7	0.775539	6.98024e-05	-2.71488	down
c110534.graph_c0	102	5.56491	4	0.205716	1.39888e-14	-4.53656	down
c110542.graph_c0	43	4.5052	0	0	1.44185e-09	-5.20697	down
c110558.graph_c0	37	1.946	10	0.495785	0.0085861	-2.0348	down
c110586.graph_c0	61	3.19889	0	0	8.07132e-13	-5.69988	down
c110608.graph_c0	38	2.32399	0	0	1.45511e-08	-5.03377	down
c110715.graph_c0	104	5.74943	26	1.35493	8.75101e-06	-2.23658	down
c110717.graph_c0	9	0.47177	74	3.65654	4.52035e-05	2.58831	up
c110727.graph_c0	7	0.729566	135	13.2633	3.9622e-11	3.75789	up
c110731.graph_c0	42	6.90167	2	0.309803	2.0793e-07	-3.93635	down
c110810.graph_c0	19	2.23276	176	19.4963	1.05955e-08	2.83586	up
c110884.graph_c0	61	5.99087	0	0	8.07132e-13	-5.69988	down
c110893.graph_c0	12	3.03074	64	15.237	0.00359569	2.01117	up
c110906.graph_c0	47	2.64967	0	0	2.45485e-10	-5.33197	down
c110911.graph_c0	46	3.4201	0	0	3.79785e-10	-5.30172	down
c110916.graph_c0	70	7.56136	0	0	2.85327e-14	-5.89485	down
c110925.graph_c0	63	2.78368	17	0.708073	0.000440989	-2.09666	down
c110939.graph_c0	85	4.48182	0	0	1.11022e-16	-6.17067	down
c110948.graph_c0	33	2.9004	0	0	1.65659e-07	-4.83689	down
c111000.graph_c0	387	24.0376	71	4.15709	8.29503e-12	-2.72084	down
c111057.graph_c0	22	1.58316	2	0.13567	0.00215622	-3.03935	down
c111065.graph_c0	37	6.85182	3	0.523693	8.97459e-06	-3.39379	down
c111112.graph_c0	4	0.443534	72	7.52577	2.39169e-07	3.52202	up
c111112.graph_c1	11	0.61048	122	6.38248	3.348e-08	3.04009	up
c111143.graph_c0	101	12.2969	0	0	0	-6.41632	down
c111150.graph_c0	57	2.42628	3	0.120376	3.26454e-09	-4.00128	down
c111185.graph_c0	1	0.0555768	35	1.83364	9.64185e-05	3.75394	up
c111186.graph_c0	269	29.5146	0	0	0	-7.81898	down
c111189.graph_c0	41	2.93361	0	0	3.58564e-09	-5.14017	down
c111190.graph_c0	82	6.16243	0	0	4.44089e-16	-6.11956	down
c111216.graph_c0	2	0.221419	29	3.02645	0.00413358	2.95337	up
c111218.graph_c0	263	27.2142	0	0	0	-7.78658	down
c111227.graph_c0	24	3.87539	1	0.152214	0.000157949	-3.64864	down
c111259.graph_c0	27	1.77965	4	0.248531	0.00239963	-2.66476	down
c111269.graph_c0	9	0.985755	79	8.15652	1.57451e-05	2.68086	up
c111278.graph_c0	3	0.341711	48	5.15383	3.70071e-05	3.25979	up
c111299.graph_c0	17	3.59358	0	0	0.00106324	-3.92671	down
c111325.graph_c0	3	0.309153	42	4.07993	0.000226792	3.07327	up
c111351.graph_c0	36	3.17296	9	0.74775	0.00600395	-2.1281	down
c111369.graph_c0	29	2.33912	0	0	1.27608e-06	-4.65742	down
c111373.graph_c0	4	0.495175	40	4.66778	0.00143969	2.69697	up
c111393.graph_c0	99	4.35057	7	0.289975	3.44369e-12	-3.86343	down
c111405.graph_c0	857	23.9284	86	2.26351	0	-3.59396	down
c111407.graph_c0	48	3.19402	0	0	1.59317e-10	-5.3616	down
c111412.graph_c0	43	3.96252	0	0	1.44185e-09	-5.20697	down
c111452.graph_c0	55	4.50273	0	0	8.59657e-12	-5.55352	down
c111484.graph_c0	0	0	53	5.53003	2.05698e-08	5.20901	up
c111488.graph_c0	81	3.73969	3	0.130564	9.6978e-13	-4.49943	down
c111508.graph_c0	0	0	33	2.67783	2.28013e-05	4.54893	up
c111628.graph_c0	2	0.240101	49	5.54513	5.69368e-06	3.68135	up
c111670.graph_c0	22	2.87674	0	0	5.72739e-05	-4.27695	down
c111685.graph_c2	6	1.08547	144	24.5573	2.15483e-12	4.03774	up
c111703.graph_c0	1	0.134836	32	4.06732	0.000285857	3.63011	up
c111709.graph_c0	31	2.8821	0	0	4.54657e-07	-4.74995	down
c111720.graph_c0	174	11.8165	0	0	0	-7.19394	down
c111749.graph_c0	102	11.1137	0	0	0	-6.43036	down
c111752.graph_c0	215	6.75465	9	0.266538	0	-4.6672	down
c111770.graph_c0	139	5.2759	0	0	0	-6.87242	down
c111771.graph_c0	1300	24.8121	284	5.10963	2.54617e-11	-2.48797	down
c111783.graph_c0	63	3.70311	0	0	3.76477e-13	-5.74554	down
c111816.graph_c0	0	0	33	2.29381	2.28013e-05	4.54893	up
c111830.graph_c0	0	0	126	6.81233	2.22045e-16	6.4356	up
c111895.graph_c0	117	11.9393	0	0	0	-6.62616	down
c111927.graph_c0	107	6.95403	0	0	0	-6.49862	down
c111950.graph_c0	2	0.105721	34	1.69419	0.000730828	3.17256	up
c111986.graph_c0	96	6.78	0	0	0	-6.34395	down
c112018.graph_c0	79	12.1988	0	0	1.22125e-15	-6.06658	down
c112026.graph_c0	136	14.8182	0	0	0	-6.84121	down
c112046.graph_c0	88	4.40841	0	0	1.11022e-16	-6.22003	down
c112062.graph_c0	27	3.41412	4	0.476789	0.00239963	-2.66476	down
c112077.graph_c0	0	0	22	2.77629	0.00202048	3.99446	up
c112079.graph_c0	27	1.3909	4	0.194242	0.00239963	-2.66476	down
c112082.graph_c0	142	5.46584	18	0.653119	2.86131e-11	-3.17803	down
c112132.graph_c0	91	6.91333	22	1.57551	1.32428e-05	-2.27329	down
c112139.graph_c0	25	2.40261	0	0	1.07965e-05	-4.45242	down
c112159.graph_c0	33	3.13068	0	0	1.65659e-07	-4.83689	down
c112209.graph_c0	72	12.349	9	1.4551	6.89823e-08	-3.1047	down
c112217.graph_c0	28	3.36974	0	0	2.15657e-06	-4.60884	down
c112279.graph_c0	63	2.71857	0	0	3.76477e-13	-5.74554	down
c112303.graph_c0	8	0.376558	107	4.74763	2.10264e-08	3.26053	up
c112379.graph_c0	213	18.3357	0	0	0	-7.4839	down
c112395.graph_c0	25	3.09179	0	0	1.07965e-05	-4.45242	down
c112410.graph_c0	63	3.60679	0	0	3.76477e-13	-5.74554	down
c112426.graph_c0	29	3.6114	0	0	1.27608e-06	-4.65742	down
c112454.graph_c1	63	4.28766	0	0	3.76477e-13	-5.74554	down
c112497.graph_c0	51	4.24738	0	0	4.45819e-11	-5.447	down
c112500.graph_c0	38	2.86606	0	0	1.45511e-08	-5.03377	down
c112526.graph_c0	47	4.29641	0	0	2.45485e-10	-5.33197	down
c112546.graph_c1	0	0	19	2.87534	0.00753094	3.79718	up
c112557.graph_c0	11	2.909	77	19.1952	0.000131021	2.38616	up
c112561.graph_c0	57	1.50763	11	0.27426	3.68998e-05	-2.52172	down
c112649.graph_c0	51	3.71264	0	0	4.45819e-11	-5.447	down
c112655.graph_c0	37	2.84733	9	0.652874	0.00430157	-2.16637	down
c112656.graph_c0	220	20.5756	0	0	0	-7.5303	down
c112676.graph_c0	43	9.37393	4	0.821987	3.16081e-06	-3.31317	down
c112677.graph_c1	3	0.200691	74	4.66648	3.04378e-08	3.86912	up
c112746.graph_c0	41	2.07966	0	0	3.58564e-09	-5.14017	down
c112752.graph_c1	0	0	19	1.85177	0.00753094	3.79718	up
c112752.graph_c2	0	0	51	2.18106	3.92454e-08	5.15505	up
c112760.graph_c0	81	6.72361	0	0	6.66134e-16	-6.10212	down
c112869.graph_c0	65	1.4632	18	0.381956	0.000478184	-2.06486	down
c112887.graph_c0	4	0.325568	38	2.91552	0.00261048	2.62567	up
c112955.graph_c0	315	16.3955	0	0	0	-8.04579	down
c112965.graph_c0	113	5.60929	0	0	0	-6.57649	down
c112986.graph_c0	3	0.253292	37	2.94479	0.00108163	2.897	up
c113014.graph_c0	44	3.01418	9	0.581179	0.000420395	-2.40914	down
c113028.graph_c0	29	3.01258	3	0.293774	0.000300374	-3.05473	down
c113039.graph_c0	199	15.251	0	0	0	-7.38639	down
c113045.graph_c0	0	0	23	1.96901	0.00131475	4.05465	up
c113056.graph_c0	11	0.701228	143	8.59318	1.11206e-09	3.26669	up
c113065.graph_c0	89	5.59018	10	0.592089	1.82903e-09	-3.27443	down
c113071.graph_c0	49	2.74638	0	0	1.03805e-10	-5.39063	down
c113094.graph_c0	34	2.4439	6	0.406543	0.00104862	-2.5353	down
c113111.graph_c0	0	0	53	3.16654	2.05698e-08	5.20901	up
c113113.graph_c0	332	20.6261	0	0	0	-8.12134	down
c113138.graph_c0	108	12.2793	0	0	0	-6.5119	down
c113168.graph_c0	74	4.76735	0	0	6.88338e-15	-5.97371	down
c113169.graph_c0	61	4.54073	0	0	8.07132e-13	-5.69988	down
c113218.graph_c0	780	49.025	0	0	0	-9.35065	down
c113223.graph_c0	106	3.0092	30	0.802818	4.2305e-05	-2.06765	down
c113223.graph_c1	146	3.22409	37	0.770206	1.43027e-06	-2.2354	down
c113224.graph_c0	9	0.972175	77	7.84051	2.39481e-05	2.64455	up
c113238.graph_c0	60	2.87817	4	0.180874	5.68628e-09	-3.78269	down
c113262.graph_c0	36	3.79716	9	0.894851	0.00600395	-2.1281	down
c113293.graph_c0	118	7.10569	0	0	0	-6.63831	down
c113304.graph_c0	56	2.65985	7	0.313415	1.13886e-06	-3.0546	down
c113372.graph_c0	69	5.15489	15	1.05636	2.69218e-05	-2.39088	down
c113381.graph_c0	239	10.4243	62	2.54913	1.83444e-07	-2.21957	down
c113383.graph_c0	74	3.72343	0	0	6.88338e-15	-5.97371	down
c113411.graph_c0	67	5.10239	0	0	8.50431e-14	-5.83274	down
c113430.graph_c0	2	0.0697894	36	1.18417	0.000371145	3.25169	up
c113454.graph_c0	6	0.467713	55	4.0415	0.000206412	2.67261	up
c113538.graph_c0	45	3.16051	9	0.595852	0.000302481	-2.44071	down
c113617.graph_c0	45	4.15941	9	0.784174	0.000302481	-2.44071	down
c113645.graph_c0	134	8.18659	39	2.24602	1.95886e-05	-2.0396	down
c113647.graph_c0	45	3.21981	0	0	5.89976e-10	-5.27083	down
c113672.graph_c0	10	0.517273	57	2.77937	0.00396558	2.08515	up
c113685.graph_c0	134	9.83467	0	0	0	-6.82003	down
c113688.graph_c0	178	19.7838	0	0	0	-7.22651	down
c113707.graph_c0	15	0.871743	82	4.49224	0.000826378	2.06606	up
c113708.graph_c0	2	0.262068	30	3.70558	0.00291102	2.99995	up
c113710.graph_c0	21	3.49126	2	0.313432	0.00355777	-2.97577	down
c113755.graph_c1	989	43.2141	256	10.5444	4.16951e-09	-2.24286	down
c113781.graph_c1	126	9.15784	36	2.46647	2.00039e-05	-2.06271	down
c113814.graph_c0	123	4.29683	22	0.724464	2.15042e-08	-2.70313	down
c113854.graph_c0	50	3.86881	10	0.729389	0.000138213	-2.4574	down
c113860.graph_c0	51	0.801681	1502	22.2563	0	4.54864	up
c113877.graph_c0	24	2.53579	2	0.199197	0.000799429	-3.15866	down
c113893.graph_c0	40	2.44631	11	0.634154	0.00642839	-2.02331	down
c113894.graph_c0	58	5.04117	11	0.901254	2.74467e-05	-2.5463	down
c113945.graph_c0	41	3.91033	0	0	3.58564e-09	-5.14017	down
c114058.graph_c1	1	0.171551	34	5.49825	0.00013809	3.71383	up
c114138.graph_c0	73	7.5062	0	0	9.99201e-15	-5.95439	down
c114174.graph_c0	107	3.51476	31	0.959898	5.53836e-05	-2.03592	down
c114187.graph_c2	41	8.87624	7	1.42855	0.000202934	-2.61579	down
c114214.graph_c0	0	0	45	2.08915	2.9177e-07	4.97986	up
c114240.graph_c0	49	3.74068	1	0.0719625	1.42514e-09	-4.643	down
c114258.graph_c0	1	0.0598164	32	1.80435	0.000285857	3.63011	up
c114270.graph_c0	46	3.67724	12	0.904266	0.00201621	-2.1082	down
c114289.graph_c0	320	28.0461	0	0	0	-8.06843	down
c114343.graph_c0	31	1.05832	380	12.2289	1.6287e-13	3.26704	up
c114360.graph_c0	712	31.0877	0	0	0	-9.21927	down
c114369.graph_c0	86	3.67316	0	0	1.11022e-16	-6.18731	down
c114385.graph_c0	0	0	80	2.54102	8.44225e-12	5.7898	up
c114414.graph_c1	64	3.6689	16	0.864623	0.000187578	-2.19925	down
c114431.graph_c0	382	21.6426	0	0	0	-8.32305	down
c114443.graph_c0	39	2.24096	0	0	9.07997e-09	-5.07011	down
c114460.graph_c0	43	3.97127	0	0	1.44185e-09	-5.20697	down
c114468.graph_c0	746	49.8519	0	0	0	-9.28646	down
c114469.graph_c0	42	2.64601	0	0	2.26871e-09	-5.17396	down
c114492.graph_c0	2039	78.5812	0	0	0	-10.7356	down
c114563.graph_c0	0	0	40	3.23697	1.68927e-06	4.81564	up
c114565.graph_c0	46	3.02563	13	0.806033	0.00378167	-2.00491	down
c114571.graph_c0	1	0.139934	32	4.2211	0.000285857	3.63011	up
c114574.graph_c0	0	0	25	1.74801	0.000564361	4.16798	up
c114592.graph_c0	3	0.260029	32	2.61458	0.00537953	2.69615	up
c114595.graph_c0	42	2.55864	9	0.516838	0.00081435	-2.34385	down
c114616.graph_c0	64	2.15071	0	0	2.58238e-13	-5.76784	down
c114632.graph_c0	100	5.95891	0	0	0	-6.40213	down
c114739.graph_c0	335	16.0751	81	3.66391	1.02362e-08	-2.32688	down
c114744.graph_c1	136	12.4231	2	0.172216	0	-5.60361	down
c114749.graph_c0	56	3.45514	0	0	5.74729e-12	-5.57897	down
c114767.graph_c0	115	7.42152	34	2.06836	5.12888e-05	-2.01135	down
c114809.graph_c1	42	5.77851	11	1.42663	0.00347981	-2.0917	down
c114833.graph_c0	31	5.25941	7	1.1195	0.00769622	-2.22558	down
c114850.graph_c0	75	4.75064	15	0.89564	5.82652e-06	-2.50921	down
c114859.graph_c0	112	10.7802	0	0	0	-6.5638	down
c114919.graph_c0	84	4.1874	24	1.12779	0.000164367	-2.0414	down
c114931.graph_c0	201	15.9359	0	0	0	-7.40073	down
c114998.graph_c0	213	23.1144	0	0	0	-7.4839	down
c115005.graph_c0	43	2.14811	11	0.518002	0.00255971	-2.12472	down
c115009.graph_c0	68	7.41285	17	1.74693	0.00012785	-2.20487	down
c115013.graph_c0	53	2.88675	9	0.46209	2.26627e-05	-2.67113	down
c115053.graph_c0	14	0.897773	80	4.83593	0.000628425	2.12301	up
c115096.graph_c0	1	0.075332	29	2.05934	0.000871339	3.49464	up
c115096.graph_c1	3	0.337422	43	4.55902	0.000166859	3.10608	up
c115109.graph_c0	37	2.81091	3	0.214842	8.97459e-06	-3.39379	down
c115112.graph_c0	83	2.44946	436	12.1291	1.52025e-06	2.0778	up
c115126.graph_c0	21	4.3226	2	0.388067	0.00355777	-2.97577	down
c115130.graph_c0	140	2.86937	10	0.193201	1.23235e-14	-3.92099	down
c115131.graph_c0	11	1.13416	74	7.19223	0.000238804	2.32992	up
c115139.graph_c0	89	3.41738	0	0	0	-6.23611	down
c115148.graph_c0	195	11.554	0	0	0	-7.35727	down
c115163.graph_c0	59	6.23729	6	0.597924	1.2873e-07	-3.30954	down
c115189.graph_c0	12	0.656453	66	3.40344	0.00241707	2.05458	up
c115215.graph_c0	3067	75.674	909	21.1421	1.30308e-07	-2.05226	down
c115224.graph_c0	150	6.54938	38	1.56402	1.22219e-06	-2.23706	down
c115245.graph_c0	278	18.7171	0	0	0	-7.86625	down
c115272.graph_c0	76	3.72837	3	0.138732	4.73477e-12	-4.40888	down
c115307.graph_c0	49	4.08103	12	0.94212	0.000832059	-2.19711	down
c115401.graph_c0	3	0.277527	32	2.79052	0.00537953	2.69615	up
c115412.graph_c0	2695	132.521	204	9.45598	0	-4.01347	down
c115462.graph_c2	1177	489.62	1	0.392133	0	-9.19585	down
c115470.graph_c0	118	3.209	35	0.897236	4.74373e-05	-2.00801	down
c115482.graph_c0	2	0.315098	32	4.75244	0.00145229	3.08883	up
c115518.graph_c0	0	0	61	4.31102	1.72203e-09	5.40671	up
c115534.graph_c0	961	74.0044	174	12.6309	1.66533e-13	-2.75465	down
c115536.graph_c0	0	0	104	7.77672	2.53131e-14	6.16228	up
c115590.graph_c0	72	8.17434	12	1.28426	1.19551e-06	-2.7413	down
c115604.graph_c0	173	8.7504	0	0	0	-7.18568	down
c115615.graph_c0	87	6.66596	0	0	1.11022e-16	-6.20376	down
c115634.graph_c0	60	11.26	0	0	1.18761e-12	-5.67649	down
c115651.graph_c0	186	8.87821	0	0	0	-7.28952	down
c115675.graph_c0	284	12.4395	86	3.55088	2.13325e-06	-2.00461	down
c115760.graph_c0	308	18.6826	2462	140.776	5.24081e-12	2.69454	up
c115800.graph_c0	326	14.7857	95	4.06162	6.47635e-07	-2.06153	down
c115829.graph_c0	58	3.10657	13	0.656368	0.000126263	-2.33174	down
c115829.graph_c3	36	4.68241	5	0.613039	0.000172705	-2.82229	down
c115859.graph_c0	179	4.70275	5	0.123828	0	-5.09862	down
c115888.graph_c0	11	0.700033	66	3.95932	0.00121413	2.16827	up
c115888.graph_c1	6	0.630739	74	7.333	2.04257e-06	3.09102	up
c115904.graph_c0	36	2.40061	7	0.440016	0.00123621	-2.43384	down
c115907.graph_c0	41	2.25095	208	10.7646	2.77277e-05	2.012	up
c115957.graph_c0	319	12.7829	76	2.87081	8.99435e-09	-2.34676	down
c115968.graph_c0	26	2.96149	2	0.214743	0.000300604	-3.26886	down
c115971.graph_c0	91	7.86593	17	1.38519	5.30257e-07	-2.61888	down
c115993.graph_c0	66	8.0445	19	2.18303	0.00065187	-2.01425	down
c115995.graph_c0	2	0.0208326	2904	28.5143	0	9.52848	up
c116005.graph_c0	94	6.97649	0	0	0	-6.31395	down
c116013.graph_c0	464	23.7198	127	6.11996	6.31187e-08	-2.15594	down
c116091.graph_c0	1796	53.808	271	7.65352	1.11022e-16	-3.02112	down
c116103.graph_c0	252	18.6478	0	0	0	-7.72523	down
c116110.graph_c0	89	7.62997	0	0	0	-6.23611	down
c116195.graph_c0	3	0.1138	96	3.43275	1.69633e-10	4.23816	up
c116223.graph_c2	908	38.8877	5781	233.389	2.69639e-09	2.36946	up
c116269.graph_c0	4	0.256378	42	2.53759	0.000798123	2.76492	up
c116298.graph_c0	860	47.0647	257	13.2581	2.0071e-07	-2.03589	down
c116341.graph_c0	383	11.0174	108	2.92858	2.0298e-07	-2.11083	down
c116453.graph_c0	50	3.59397	14	0.9486	0.00225048	-2.02588	down
c116455.graph_c2	53	6.30513	10	1.12142	5.4323e-05	-2.53956	down
c116475.graph_c0	8	0.49214	100	5.79896	8.08648e-08	3.16429	up
c116493.graph_c0	111	4.69301	33	1.31521	6.57684e-05	-2.00206	down
c116494.graph_c0	26	5.72767	4	0.830646	0.00370107	-2.61266	down
c116497.graph_c0	5	0.34405	48	3.11346	0.000450504	2.69753	up
c116514.graph_c0	178	9.40126	43	2.14085	2.08475e-07	-2.31011	down
c116525.graph_c0	1282	57.7495	379	16.0935	1.18778e-07	-2.05344	down
c116531.graph_c0	110	6.43559	0	0	0	-6.53808	down
c116605.graph_c0	15	0.450567	113	3.19962	4.35985e-06	2.52168	up
c116609.graph_c0	125	19.8517	0	0	0	-6.72064	down
c116616.graph_c0	110	2.99164	1389	35.6099	0	3.34483	up
c116617.graph_c2	1	0.0550404	39	2.02347	2.36122e-05	3.90407	up
c116728.graph_c0	114	6.03119	0	0	0	-6.58907	down
c116741.graph_c0	109	3.53602	0	0	0	-6.52505	down
c116758.graph_c1	28	1.96753	5	0.331196	0.00434222	-2.47292	down
c116761.graph_c0	6	0.457358	41	2.94605	0.00794677	2.2616	up
c116783.graph_c0	55	4.26622	0	0	8.59657e-12	-5.55352	down
c116794.graph_c0	8	0.29456	55	1.90896	0.00133244	2.31883	up
c116798.graph_c0	5	0.220829	65	2.70614	5.28136e-06	3.12366	up
c116840.graph_c0	74	4.43186	17	0.959743	2.94751e-05	-2.32483	down
c116868.graph_c0	15	1.01427	97	6.1828	6.17748e-05	2.30448	up
c116872.graph_c0	1	0.153167	23	3.32082	0.00876948	3.1783	up
c116921.graph_c0	42	5.40587	8	0.970638	0.000354558	-2.48863	down
c116924.graph_c2	177	9.42622	53	2.66067	9.11861e-06	-2.00942	down
c116935.graph_c0	5	0.108654	79	1.61829	1.81228e-07	3.3994	up
c116938.graph_c1	37	3.61682	8	0.737167	0.00200374	-2.31116	down
c116944.graph_c0	21	2.11647	158	15.0107	4.10682e-07	2.54534	up
c116947.graph_c0	569	28.4812	98	4.62406	2.4436e-13	-2.81865	down
c116948.graph_c0	8	0.41825	81	3.99193	3.89222e-06	2.86519	up
c116964.graph_c0	81	4.29256	13	0.64942	2.59759e-07	-2.80531	down
c116973.graph_c0	618	37.5029	0	0	0	-9.01537	down
c116984.graph_c1	248	21.0169	69	5.51211	6.27133e-07	-2.12171	down
c116996.graph_c0	51	5.16048	13	1.23998	0.000910328	-2.15018	down
c117018.graph_c1	14	1.62525	88	9.63001	0.000149028	2.25814	up
c117053.graph_c0	1	0.0677173	32	2.04268	0.000285857	3.63011	up
c117125.graph_c0	244	11.8648	0	0	0	-7.67891	down
c117126.graph_c0	57	5.64887	13	1.21446	0.000167095	-2.30716	down
c117130.graph_c0	23	5.86702	2	0.480918	0.00131073	-3.10024	down
c117154.graph_c3	861	85.2348	109	10.1717	0	-3.26389	down
c117222.graph_c0	0	0	77	4.42179	1.86433e-11	5.73567	up
c117235.graph_c0	134	9.76044	0	0	0	-6.82003	down
c117314.graph_c0	141	21.9367	37	5.42632	3.02821e-06	-2.18554	down
c117320.graph_c0	4	0.434322	45	4.60591	0.00033299	2.8612	up
c117329.graph_c0	116	4.33472	31	1.09198	1.16691e-05	-2.15119	down
c117345.graph_c1	60	3.08613	17	0.824258	0.000931596	-2.02762	down
c117366.graph_c1	136	10.5599	23	1.68345	3.75785e-09	-2.78656	down
c117386.graph_c1	18	1.30429	154	10.519	9.06149e-08	2.71818	up
c117393.graph_c0	58	3.1699	15	0.772788	0.000477624	-2.145	down
c117397.graph_c1	11	0.616011	82	4.32874	4.8799e-05	2.47527	up
c117445.graph_c0	105	12.9302	28	3.25032	1.98583e-05	-2.14885	down
c117447.graph_c0	89	8.86865	17	1.59686	8.40847e-07	-2.58724	down
c117457.graph_c0	390	34.9752	62	5.2413	2.39142e-13	-2.92325	down
c117499.graph_c0	5	0.384477	47	3.40682	0.000592157	2.66807	up
c117502.graph_c0	133	10.5473	33	2.46693	1.7553e-06	-2.26038	down
c117508.graph_c0	80	3.31751	0	0	8.88178e-16	-6.08446	down
c117554.graph_c0	43	1.30923	1247	35.7903	0	4.52053	up
c117559.graph_c0	402	25.6807	107	6.44342	4.83298e-08	-2.19371	down
c117572.graph_c0	3	0.210463	48	3.17429	3.70071e-05	3.25979	up
c117612.graph_c0	0	0	41	4.02912	1.18124e-06	4.85002	up
c117630.graph_c1	1	0.379201	32	11.4385	0.000285857	3.63011	up
c117642.graph_c1	45	4.45992	12	1.12111	0.00270953	-2.07731	down
c117678.graph_c3	1539	48.7167	37	1.10406	0	-5.6227	down
c117703.graph_c0	133	20.1261	0	0	0	-6.80932	down
c117763.graph_c0	10	1.0206	77	7.40795	5.79218e-05	2.50958	up
c117799.graph_c0	2	0.143759	34	2.30374	0.000730828	3.17256	up
c117839.graph_c0	98	6.39116	28	1.72133	7.24586e-05	-2.05047	down
c117841.graph_c0	201	10.0652	0	0	0	-7.40073	down
c117857.graph_c0	31	1.37696	6	0.251225	0.0033218	-2.40677	down
c117868.graph_c1	18	1.37542	113	8.13939	3.33395e-05	2.27652	up
c117878.graph_c0	0	0	113	3.79077	3.55271e-15	6.28041	up
c117880.graph_c0	138	5.60655	0	0	0	-6.86209	down
c117941.graph_c0	0	0	60	1.94016	2.32775e-09	5.38343	up
c117992.graph_c0	80	2.63061	23	0.712929	0.000229516	-2.02981	down
c118009.graph_c0	73	2.51522	21	0.682061	0.000377052	-2.02274	down
c118011.graph_c1	1256	53.2674	354	14.1523	3.39215e-08	-2.12196	down
c118101.graph_c0	105	13.2068	0	0	0	-6.47171	down
c118121.graph_c0	236	10.9037	71	3.09222	3.39174e-06	-2.01013	down
c118144.graph_c0	27	1.0267	234	8.38781	3.17854e-09	2.76241	up
c118159.graph_c0	10	1.1397	57	6.12373	0.00396558	2.08515	up
c118203.graph_c0	17	1.22963	103	7.02284	8.48901e-05	2.22183	up
c118208.graph_c0	41	6.88155	7	1.10752	0.000202934	-2.61579	down
c118239.graph_c0	1	0.0768511	53	3.83952	2.43221e-07	4.33266	up
c118291.graph_c0	117	6.26648	0	0	0	-6.62616	down
c118292.graph_c0	280	15.9561	54	2.90077	1.69029e-10	-2.64129	down
c118306.graph_c0	57	5.1914	15	1.28781	0.000622535	-2.12042	down
c118319.graph_c0	4244	83.2538	1023	18.9171	3.58727e-10	-2.35051	down
c118386.graph_c0	6	0.287817	44	1.98962	0.00358909	2.36006	up
c118389.graph_c0	0	0	61	8.46611	1.72203e-09	5.40671	up
c118421.graph_c0	178	6.74395	24	0.85715	6.3235e-12	-3.11408	down
c118426.graph_c0	130	7.89263	0	0	0	-6.7767	down
c118476.graph_c0	217	9.50122	0	0	0	-7.5106	down
c118498.graph_c0	99	8.20688	17	1.32844	8.66184e-08	-2.73893	down
c118499.graph_c0	122	8.12477	29	1.82054	1.56167e-06	-2.31493	down
c118528.graph_c1	220	3.69318	22	0.348139	2.44249e-15	-3.53583	down
c118585.graph_c0	141	16.549	42	4.64679	2.21156e-05	-2.00927	down
c118592.graph_c1	54	5.88944	9	0.925282	1.64886e-05	-2.69751	down
c118658.graph_c0	62	6.47618	6	0.590786	4.74972e-08	-3.37971	down
c118675.graph_c0	42	2.30951	267	13.8399	2.58054e-07	2.33623	up
c118687.graph_c0	264	10.7909	0	0	0	-7.79203	down
c118792.graph_c0	12	1.46295	95	10.9175	9.41684e-06	2.5704	up
c118795.graph_c0	15	1.21301	127	9.68118	4.764e-07	2.68814	up
c118795.graph_c1	5	0.595467	48	5.38865	0.000450504	2.69753	up
c118796.graph_c0	24	0.62297	147	3.59687	9.81353e-06	2.25934	up
c118797.graph_c0	15	1.25046	86	6.75814	0.000410114	2.13359	up
c118810.graph_c0	88	3.24587	0	0	1.11022e-16	-6.22003	down
c118855.graph_c0	211	10.5407	0	0	0	-7.47037	down
c118894.graph_c0	0	0	19	2.45454	0.00753094	3.79718	up
c118894.graph_c1	0	0	61	3.10766	1.72203e-09	5.40671	up
c118897.graph_c0	7	0.322235	56	2.43004	0.000431467	2.51023	up
c118904.graph_c0	251	12.4169	0	0	0	-7.71952	down
c118905.graph_c0	277	10.4632	0	0	0	-7.86107	down
c118936.graph_c0	25	1.14889	149	6.4547	1.30285e-05	2.22249	up
c118944.graph_c0	12	1.03897	82	6.69247	0.000106799	2.36158	up
c119015.graph_c0	6	0.461214	47	3.40565	0.00162919	2.45223	up
c119031.graph_c0	145	6.63106	0	0	0	-6.93288	down
c119057.graph_c2	14	0.822497	345	19.1063	0	4.21137	up
c119071.graph_c0	240	10.4102	0	0	0	-7.65518	down
c119094.graph_c0	89	16.1295	17	2.90424	8.40847e-07	-2.58724	down
c119101.graph_c0	584	34.1917	5200	286.987	1.97065e-13	2.85237	up
c119105.graph_c1	6	0.625446	50	4.91315	0.00074511	2.53887	up
c119124.graph_c0	90	4.93123	17	0.878037	6.67463e-07	-2.60315	down
c119138.graph_c0	12	0.266683	87	1.82257	4.14526e-05	2.44551	up
c119164.graph_c0	85	8.57618	23	2.18753	8.0391e-05	-2.11602	down
c119187.graph_c0	39	9.62249	2	0.465162	7.56414e-07	-3.83251	down
c119200.graph_c0	6	0.199598	61	1.91287	4.58973e-05	2.81829	up
c119259.graph_c1	0	0	58	1.32233	4.28412e-09	5.33571	up
c119260.graph_c0	41	4.16765	11	1.05403	0.00473033	-2.05791	down
c119309.graph_c0	6	0.457864	78	5.61089	8.15834e-07	3.16552	up
c119320.graph_c0	394	13.5248	94	3.04169	4.0967e-09	-2.34897	down
c119364.graph_c1	209	25.9471	49	5.73443	4.94946e-08	-2.35772	down
c119368.graph_c0	5	0.115118	192	4.16704	2.22045e-16	4.66496	up
c119398.graph_c0	0	0	34	2.98252	1.5549e-05	4.59019	up
c119431.graph_c0	21744	429.671	4048	75.4029	2.01505e-13	-2.72445	down
c119432.graph_c0	223	8.89759	0	0	0	-7.54973	down
c119439.graph_c0	64	4.64821	17	1.16387	0.000343935	-2.11896	down
c119491.graph_c0	11	0.753693	76	4.9087	0.000159945	2.36765	up
c119569.graph_c0	45	1.58703	250	8.31123	3.27179e-06	2.14498	up
c119577.graph_c0	109	9.57809	18	1.491	2.09446e-08	-2.80012	down
c119588.graph_c1	4	0.26897	47	2.97916	0.000187334	2.92198	up
c119588.graph_c2	66	6.00639	12	1.02944	6.26042e-06	-2.61791	down
c119595.graph_c1	14	1.04103	83	5.8179	0.000365139	2.17518	up
c119603.graph_c0	257	15.9899	55	3.22571	2.55965e-09	-2.4924	down
c119635.graph_c0	219	9.76601	0	0	0	-7.52376	down
c119670.graph_c0	91	5.2675	0	0	0	-6.26775	down
c119727.graph_c1	0	0	24	3.54138	0.000859435	4.11243	up
c119728.graph_c3	51	2.87931	274	14.5821	4.04939e-06	2.10032	up
c119737.graph_c0	5	0.38527	71	5.15709	1.20656e-06	3.24834	up
c119772.graph_c0	457	17.8871	0	0	0	-8.58094	down
c119779.graph_c0	4	0.352789	34	2.82674	0.00868635	2.47152	up
c119817.graph_c0	1143	81.3582	0	0	0	-9.90123	down
c119819.graph_c1	153	16.8216	34	3.52375	1.23903e-07	-2.41955	down
c119899.graph_c0	117	4.51793	635	23.1142	3.56232e-07	2.12935	up
c119944.graph_c0	99	2.19213	1135	23.6907	1.22125e-15	3.2041	up
c120024.graph_c1	447	13.111	66	1.82483	1.54321e-14	-3.03132	down
c120026.graph_c0	2	0.233262	47	5.1673	1.05575e-05	3.62302	up
c120046.graph_c0	184	4.02217	0	0	0	-7.27403	down
c120065.graph_c0	0	0	19	3.14057	0.00753094	3.79718	up
c120087.graph_c3	6545	144.181	1893	39.3097	9.71418e-08	-2.08842	down
c120111.graph_c0	237	36.783	0	0	0	-7.63712	down
c120129.graph_c0	354	10.9813	0	0	0	-8.21359	down
c120137.graph_c0	6	0.256617	64	2.58027	2.19872e-05	2.88595	up
c120158.graph_c0	484	24.3066	144	6.817	3.97968e-07	-2.03738	down
c120173.graph_c0	170	5.47806	37	1.12391	4.35102e-08	-2.45331	down
c120183.graph_c0	185	8.38695	0	0	0	-7.2818	down
c120203.graph_c0	17	0.734993	97	3.95328	0.000222818	2.1365	up
c120235.graph_c0	361	21.0242	0	0	0	-8.24174	down
c120245.graph_c0	0	0	22	2.0528	0.00202048	3.99446	up
c120253.graph_c7	116	10.7369	599	52.2635	1.11108e-06	2.05761	up
c120255.graph_c0	768	40.157	0	0	0	-9.32832	down
c120261.graph_c0	8	0.415604	91	4.45638	4.86429e-07	3.0303	up
c120305.graph_c3	24	1.69787	4	0.26675	0.00882615	-2.50247	down
c120307.graph_c3	81	2.41076	20	0.561113	3.64331e-05	-2.23614	down
c120350.graph_c0	79	4.95403	18	1.06403	1.70033e-05	-2.34165	down
c120360.graph_c0	282	16.6969	45	2.5116	2.57483e-12	-2.90691	down
c120398.graph_c0	824	24.3784	142	3.96021	6.02851e-14	-2.82352	down
c120399.graph_c0	692	27.9972	155	5.91143	1.55357e-10	-2.44691	down
c120411.graph_c5	5	1.89189	37	13.1971	0.00964331	2.33474	up
c120450.graph_c0	500	14.9969	85	2.40327	3.17968e-13	-2.83462	down
c120457.graph_c0	43	4.60519	6	0.605733	3.56681e-05	-2.8638	down
c120457.graph_c2	52	2.69204	14	0.683215	0.00129788	-2.08117	down
c120458.graph_c0	134	19.7148	38	5.27014	1.31819e-05	-2.07569	down
c120625.graph_c0	138	19.8217	35	4.73893	1.99345e-06	-2.2318	down
c120648.graph_c0	13	1.39274	80	8.0792	0.000321422	2.22122	up
c120689.graph_c3	720	14.6848	157	3.01846	6.83168e-11	-2.48572	down
c120698.graph_c0	1	0.0804525	50	3.79194	6.21262e-07	4.25093	up
c120699.graph_c0	9	0.955718	64	6.40647	0.000395854	2.38325	up
c120701.graph_c1	6	0.466617	53	3.88541	0.000343821	2.62059	up
c120766.graph_c1	88	5.33599	18	1.02886	2.12427e-06	-2.4951	down
c120783.graph_c0	20	1.58578	116	8.67009	7.04605e-05	2.17086	up
c120799.graph_c0	0	0	157	7.78382	0	6.74964	up
c120840.graph_c0	16	3.87873	0	0	0.00194985	-3.84516	down
c120840.graph_c1	290	14.7629	61	2.92722	9.16134e-10	-2.52026	down
c120848.graph_c0	36	1.61318	187	7.89903	2.9733e-05	2.04155	up
c120895.graph_c0	16	0.573546	105	3.54804	3.21884e-05	2.33073	up
c120937.graph_c1	188	14.5885	31	2.26759	1.37318e-10	-2.84215	down
c120949.graph_c0	24	0.521538	203	4.15836	1.29991e-08	2.72105	up
c120953.graph_c1	73	3.7575	17	0.824853	3.75814e-05	-2.30552	down
c121033.graph_c0	3	0.083661	792	20.8199	0	7.26327	up
c121039.graph_c0	42	4.84527	315	34.2555	6.05086e-09	2.57353	up
c121078.graph_c0	255	8.31607	25	0.768545	3.33067e-16	-3.57423	down
c121094.graph_c2	904	12.1025	4972	62.7463	1.16205e-07	2.15839	up
c121124.graph_c0	188	6.39882	0	0	0	-7.30485	down
c121140.graph_c0	156	4.02742	873	21.2456	1.11691e-07	2.17628	up
c121160.graph_c0	134	13.0134	33	3.021	1.49439e-06	-2.27109	down
c121179.graph_c1	55	3.21031	301	16.5616	2.12206e-06	2.12869	up
c121181.graph_c0	257	6.79754	0	0	0	-7.75344	down
c121279.graph_c0	268	7.69522	0	0	0	-7.81363	down
c121452.graph_c1	0	0	42	3.17302	8.28742e-07	4.88359	up
c121455.graph_c0	1306	32.743	314	7.4209	4.08138e-10	-2.35045	down
c121506.graph_c1	477	11.8613	102	2.39092	1.43379e-10	-2.50791	down
c121577.graph_c4	1629	53.5423	398	12.3313	5.56345e-10	-2.32844	down
c121594.graph_c0	4458	358.34	0	0	0	-11.8637	down
c121621.graph_c0	39	1.54684	242	9.04791	6.13515e-07	2.29906	up
c121686.graph_c0	8	1.15703	47	6.40772	0.00888221	2.09845	up
c121689.graph_c0	29	1.82152	6	0.355253	0.00718593	-2.31425	down
c121705.graph_c0	240	17.5372	70	4.82168	1.77102e-06	-2.05431	down
c121732.graph_c0	872	20.413	213	4.70025	1.02555e-09	-2.32507	down
c121736.graph_c1	50	6.42106	14	1.69479	0.00225048	-2.02588	down
c121741.graph_c0	80	3.1377	16	0.591552	3.4736e-06	-2.51588	down
c121801.graph_c0	1	0.198416	25	4.67593	0.00401813	3.29163	up
c121919.graph_c0	2	0.0915965	55	2.37445	9.40815e-07	3.8434	up
c121919.graph_c1	20	0.615724	296	8.59012	6.08402e-14	3.5113	up
c121919.graph_c3	52	0.985625	982	17.5457	0	3.90892	up
c121944.graph_c0	406	5.65506	98	1.28673	4.85019e-09	-2.33291	down
c121958.graph_c1	7	1.30237	72	12.6275	9.92712e-06	2.86456	up
c121967.graph_c1	9	1.19362	50	6.25092	0.0091932	2.03616	up
c121976.graph_c0	127	2.66781	34	0.673259	7.27422e-06	-2.15314	down
c121990.graph_c0	129	10.777	37	2.91381	1.88689e-05	-2.05835	down
c121990.graph_c1	47	4.32477	11	0.954133	0.000751418	-2.24972	down
c122034.graph_c2	63	4.68404	13	0.911119	3.14937e-05	-2.44872	down
c122194.graph_c0	38	3.23893	390	31.3353	4.20486e-12	3.02055	up
c122272.graph_c4	10264	190.68	2243	39.2797	2.54434e-11	-2.49287	down
c122333.graph_c0	27	0.857296	187	5.59706	4.42788e-07	2.4412	up
c122347.graph_c0	8	1.3974	59	9.71484	0.000522849	2.41756	up
c122407.graph_c0	1799	21.8152	179	2.04613	0	-3.61786	down
c122407.graph_c1	26	5.85705	5	1.06176	0.00982601	-2.37055	down
c122420.graph_c0	30	7.04081	4	0.884937	0.000660502	-2.81063	down
c122435.graph_c0	56	3.94833	7	0.465238	1.13886e-06	-3.0546	down
c122435.graph_c1	270	13.0613	54	2.46246	4.60915e-10	-2.58905	down
c122451.graph_c1	9	0.913177	52	4.97356	0.005842	2.09116	up
c122547.graph_c1	1	0.0523476	470	23.1924	0	7.44623	up
c122547.graph_c2	0	0	203	13.9033	0	7.11732	up
c122549.graph_c0	1	0.0248715	720	16.8805	0	8.06	up
c122569.graph_c0	0	0	148	11.2601	0	6.66529	up
c122569.graph_c1	0	0	847	5.40241	0	9.17028	up
c122608.graph_c0	325521	11867.3	31442	1080.52	0	-3.67148	down
c122609.graph_c0	8141	1255.55	818	118.922	0	-3.61221	down
c122652.graph_c1	75	24.4052	420	128.832	4.87859e-07	2.16808	up
c122661.graph_c0	5001	576.965	225	24.4696	0	-4.76471	down
c122667.graph_c0	1	0.246227	31	7.19529	0.00041319	3.58635	up
c122690.graph_c0	163	17.2799	1576	157.493	4.78506e-14	2.96456	up
c122696.graph_c0	1094	25.9098	5571	124.374	8.48085e-07	2.04757	up
c122724.graph_c0	263	15.9754	1689	96.7115	2.18669e-09	2.37818	up
c122751.graph_c0	1034	299.216	0	0	0	-9.7568	down
c122753.graph_c0	9	0.481425	125	6.303	2.51235e-09	3.33311	up
c122757.graph_c0	339	14.0859	1911	74.8508	5.32047e-08	2.19144	up
c122764.graph_c0	33	1.66579	1554	73.9451	0	5.2078	up
c122792.graph_c0	0	0	137	34.9541	0	6.55501	up
c122810.graph_c0	199	50.181	25	5.94261	5.37903e-13	-3.2184	down
c122815.graph_c0	156	68.5251	0	0	0	-7.03754	down
c122827.graph_c0	24	3.21191	378	47.6864	1.66533e-15	3.61314	up
c122831.graph_c0	5	1.69737	74	23.6804	5.8701e-07	3.30686	up
c122833.graph_c0	0	0	189	39.1107	0	7.01499	up
c122834.graph_c0	3	0.272058	492	42.0588	0	6.57806	up
c122849.graph_c0	6	1.29896	107	21.8364	1.76669e-09	3.61432	up
c122853.graph_c0	0	0	833	39.0713	0	9.14627	up
c122877.graph_c0	13	5.23431	70	26.5684	0.00212473	2.03229	up
c122913.graph_c0	24	2.32791	260	23.7727	3.63677e-11	3.0758	up
c122918.graph_c0	11	2.77382	61	14.5	0.00340519	2.05719	up
c122936.graph_c0	1	0.203172	69	13.2149	2.30492e-09	4.70419	up
c122942.graph_c0	0	0	317	25.0362	0	7.75658	up
c122949.graph_c0	0	0	111	22.4974	5.32907e-15	6.25498	up
c122965.graph_c0	72	22.7218	20	5.94966	0.000278255	-2.06883	down
c122981.graph_c0	209	27.7337	15	1.87631	0	-3.97315	down
c122982.graph_c0	15	2.69812	91	15.4299	0.000172336	2.21378	up
c123001.graph_c0	15	1.60921	108	10.9218	9.84724e-06	2.45725	up
c123016.graph_c0	4	0.27951	217	14.2938	0	5.09419	up
c123022.graph_c0	58	13.5883	2	0.441692	3.51989e-10	-4.39095	down
c123056.graph_c0	1	0.334068	23	7.24292	0.00876948	3.1783	up
c123075.graph_c0	0	0	28	8.96014	0.000164133	4.32286	up
c123100.graph_c0	0	0	116	14.3283	1.88738e-15	6.31773	up
c123113.graph_c0	251	13.0265	61	2.98425	3.97458e-08	-2.31281	down
c123116.graph_c0	69	23.9419	6	1.96251	4.96492e-09	-3.53126	down
c123142.graph_c0	71	16.3291	0	0	2.0095e-14	-5.91497	down
c123187.graph_c0	45	14.6431	0	0	5.89976e-10	-5.27083	down
c123217.graph_c0	20	8.97378	0	0	0.000180286	-4.14687	down
c123286.graph_c0	62	3.90602	10	0.593873	3.52102e-06	-2.7612	down
c123366.graph_c0	17	3.49925	0	0	0.00106324	-3.92671	down
c123390.graph_c0	46	4.94336	0	0	3.79785e-10	-5.30172	down
c123391.graph_c0	1	0.0747931	23	1.62159	0.00876948	3.1783	up
c123433.graph_c0	18	3.37315	0	0	0.000584137	-4.00389	down
c123466.graph_c0	35	2.48728	0	0	6.16667e-08	-4.91889	down
c123548.graph_c0	18	5.04608	0	0	0.000584137	-4.00389	down
c123584.graph_c0	20	6.37577	0	0	0.000180286	-4.14687	down
c123594.graph_c0	63	3.72229	0	0	3.76477e-13	-5.74554	down
c123668.graph_c0	41	4.54622	0	0	3.58564e-09	-5.14017	down
c123722.graph_c0	19	1.85728	1	0.0921459	0.00228905	-3.32952	down
c123807.graph_c0	27	3.79985	0	0	3.66649e-06	-4.55856	down
c123892.graph_c0	20	2.4186	1	0.113995	0.0013279	-3.39924	down
c124004.graph_c0	19	1.8316	2	0.181743	0.00975095	-2.83955	down
c124012.graph_c0	23	2.42189	2	0.198522	0.00131073	-3.10024	down
c124135.graph_c0	50	4.04859	0	0	6.78987e-11	-5.41909	down
c124337.graph_c0	24	3.57825	0	0	1.87049e-05	-4.39627	down
c124348.graph_c0	0	0	20	1.54249	0.00483655	3.86598	up
c124958.graph_c0	19	2.75423	0	0	0.000323325	-4.07715	down
c125233.graph_c0	26	3.09056	0	0	6.27195e-06	-4.50646	down
c125269.graph_c0	24	2.57914	1	0.101301	0.000157949	-3.64864	down
c125380.graph_c0	16	1.64073	0	0	0.00194985	-3.84516	down
c125387.graph_c0	26	2.09714	4	0.304135	0.00370107	-2.61266	down
c125510.graph_c0	40	2.4368	0	0	5.69275e-09	-5.10556	down
c125818.graph_c0	18	2.91962	0	0	0.000584137	-4.00389	down
c126564.graph_c0	16	1.47011	0	0	0.00194985	-3.84516	down
c126716.graph_c0	19	2.33824	1	0.116008	0.00228905	-3.32952	down
c126775.graph_c0	16	2.10534	0	0	0.00194985	-3.84516	down
c127034.graph_c0	29	2.68422	0	0	1.27608e-06	-4.65742	down
c127053.graph_c0	17	2.22758	0	0	0.00106324	-3.92671	down
c128211.graph_c0	16	2.10534	0	0	0.00194985	-3.84516	down
c129436.graph_c0	16	1.44471	0	0	0.00194985	-3.84516	down
c129724.graph_c0	23	1.67239	0	0	3.26206e-05	-4.33784	down
c129761.graph_c0	16	2.04112	0	0	0.00194985	-3.84516	down
c130866.graph_c0	16	1.40037	0	0	0.00194985	-3.84516	down
c131180.graph_c0	16	2.14585	0	0	0.00194985	-3.84516	down
c132038.graph_c0	25	1.69227	0	0	1.07965e-05	-4.45242	down
c132609.graph_c0	17	1.49205	0	0	0.00106324	-3.92671	down
c137583.graph_c0	17	1.38907	0	0	0.00106324	-3.92671	down
c19193.graph_c0	20	2.67659	0	0	0.000180286	-4.14687	down
c19196.graph_c0	25	2.78192	1	0.104895	9.39376e-05	-3.70479	down
c19443.graph_c0	25	3.40383	0	0	1.07965e-05	-4.45242	down
c19522.graph_c0	25	1.42476	2	0.107445	0.000489314	-3.21481	down
c19562.graph_c0	29	2.40404	0	0	1.27608e-06	-4.65742	down
c19613.graph_c0	16	2.04945	0	0	0.00194985	-3.84516	down
c19628.graph_c0	20	1.77774	0	0	0.000180286	-4.14687	down
c19739.graph_c0	24	1.54857	4	0.243294	0.00882615	-2.50247	down
c20393.graph_c0	69	2.58457	1	0.0353094	6.87228e-13	-5.12681	down
c20406.graph_c0	24	2.228	2	0.175019	0.000799429	-3.15866	down
c20803.graph_c0	20	3.82788	0	0	0.000180286	-4.14687	down
c20923.graph_c0	16	2.88627	0	0	0.00194985	-3.84516	down
c21382.graph_c0	16	2.5362	0	0	0.00194985	-3.84516	down
c21604.graph_c0	16	1.15803	0	0	0.00194985	-3.84516	down
c22436.graph_c0	17	1.73195	0	0	0.00106324	-3.92671	down
c23664.graph_c0	17	2.23224	0	0	0.00106324	-3.92671	down
c23837.graph_c0	16	1.89113	0	0	0.00194985	-3.84516	down
c23876.graph_c0	25	2.69122	0	0	1.07965e-05	-4.45242	down
c24312.graph_c0	56	1.98839	0	0	5.74729e-12	-5.57897	down
c24580.graph_c0	21	1.79054	0	0	0.000101257	-4.21338	down
c24618.graph_c0	24	1.46493	3	0.172615	0.00296524	-2.79357	down
c24861.graph_c0	18	2.0137	0	0	0.000584137	-4.00389	down
c24924.graph_c0	32	1.76905	1	0.0521126	2.83948e-06	-4.04644	down
c25212.graph_c0	7	1.15028	47	7.28038	0.00399542	2.26452	up
c25256.graph_c0	0	0	82	8.07165	5.02298e-12	5.82478	up
c25282.graph_c0	2	0.373678	40	7.04497	9.84472e-05	3.39801	up
c25416.graph_c0	39	7.44165	1	0.179869	1.07727e-07	-4.32248	down
c25492.graph_c0	21	5.13049	0	0	0.000101257	-4.21338	down
c25534.graph_c0	50	12.7105	1	0.239631	9.43835e-10	-4.67146	down
c25619.graph_c0	90	4.52124	20	0.947102	4.98171e-06	-2.38604	down
c25651.graph_c0	285	59.6424	67	13.2171	1.10287e-08	-2.36297	down
c25661.graph_c0	4	0.607934	37	5.3009	0.00352123	2.58865	up
c25694.graph_c0	723	67.8637	52	4.60102	0	-4.05907	down
c25701.graph_c0	2	0.170528	69	5.54582	1.86715e-08	4.16291	up
c25727.graph_c0	88	3.36047	664	23.9022	2.25814e-10	2.59976	up
c25733.graph_c0	2157	92.3797	626	25.2727	6.7587e-08	-2.08176	down
c25749.graph_c0	91	14.2092	4	0.588761	3.00204e-13	-4.37395	down
c25790.graph_c0	92	9.35771	705	67.5962	1.31244e-10	2.62272	up
c25844.graph_c0	16	6.24191	0	0	0.00194985	-3.84516	down
c25972.graph_c0	97	14.3937	0	0	0	-6.35871	down
c26118.graph_c0	99	3.19874	831	25.3103	9.15645e-12	2.75501	up
c26374.graph_c0	51	3.38288	3	0.187581	3.10776e-08	-3.8443	down
c26408.graph_c0	0	0	330	27.0376	0	7.8143	up
c26548.graph_c0	88	3.84766	1145	47.1922	0	3.38451	up
c26615.graph_c0	67	3.93638	0	0	8.50431e-14	-5.83274	down
c26804.graph_c0	691	40.1464	109	5.96962	8.99281e-15	-2.94705	down
c27059.graph_c0	113	31.5373	31	8.15565	1.95539e-05	-2.11378	down
c27127.graph_c0	97	28.8686	0	0	0	-6.35871	down
c27131.graph_c0	85	12.7032	2	0.281757	3.59712e-14	-4.93307	down
c27388.graph_c0	20	1.22554	841	48.5787	0	5.01317	up
c27459.graph_c0	224	17.2896	23	1.67347	3.21965e-15	-3.5015	down
c27504.graph_c0	30	3.02203	5	0.474787	0.00192227	-2.56851	down
c27920.graph_c0	10	1.66949	58	9.12776	0.00319467	2.10961	up
c29412.graph_c0	2	0.330382	36	5.60583	0.000371145	3.25169	up
c30636.graph_c0	20	1.88739	0	0	0.000180286	-4.14687	down
c31011.graph_c0	18	1.14667	1	0.0600507	0.00396341	-3.25626	down
c31423.graph_c0	1837	201.203	8	0.825976	0	-7.89986	down
c31859.graph_c0	16	1.60916	0	0	0.00194985	-3.84516	down
c34859.graph_c0	6	1.11771	44	7.72645	0.00358909	2.36006	up
c35577.graph_c0	21	1.99376	0	0	0.000101257	-4.21338	down
c35582.graph_c0	46	5.95296	7	0.853934	3.45447e-05	-2.77735	down
c35975.graph_c0	2	0.320262	46	6.94359	1.44246e-05	3.59295	up
c36652.graph_c0	34	6.22279	0	0	1.00808e-07	-4.87848	down
c36714.graph_c0	20	3.74795	2	0.353301	0.00588497	-2.90927	down
c38086.graph_c0	41	7.82328	0	0	3.58564e-09	-5.14017	down
c38518.graph_c0	0	0	161	17.2242	0	6.78561	up
c38985.graph_c0	19	1.98735	0	0	0.000323325	-4.07715	down
c42165.graph_c0	31	3.80011	0	0	4.54657e-07	-4.74995	down
c43450.graph_c0	16	1.44888	0	0	0.00194985	-3.84516	down
c43843.graph_c0	47	8.15029	0	0	2.45485e-10	-5.33197	down
c44293.graph_c0	64	3.20484	16	0.755262	0.000187578	-2.19925	down
c44327.graph_c0	12	1.16446	73	6.67754	0.000608221	2.19699	up
c44480.graph_c0	34	4.95151	0	0	1.00808e-07	-4.87848	down
c44511.graph_c0	19	2.09567	0	0	0.000323325	-4.07715	down
c44660.graph_c0	103	7.93053	0	0	0	-6.44428	down
c44794.graph_c0	5	1.07875	42	8.54181	0.00236389	2.51101	up
c44814.graph_c0	27	1.45046	0	0	3.66649e-06	-4.55856	down
c45046.graph_c0	17	1.64893	0	0	0.00106324	-3.92671	down
c45057.graph_c0	30	6.32032	3	0.595786	0.000191593	-3.10173	down
c45404.graph_c0	650	35.6824	1	0.0517478	0	-8.34043	down
c45776.graph_c0	0	0	128	8.34771	1.11022e-16	6.45806	up
c45955.graph_c0	26	6.32739	4	0.91762	0.00370107	-2.61266	down
c47956.graph_c0	36	2.18253	0	0	3.7917e-08	-4.95821	down
c49869.graph_c0	26	2.06528	0	0	6.27195e-06	-4.50646	down
c50293.graph_c0	19	3.22954	2	0.320456	0.00975095	-2.83955	down
c51188.graph_c0	30	1.99415	0	0	7.59518e-07	-4.70443	down
c51278.graph_c0	463	21.3605	63	2.73983	1.55431e-15	-3.14754	down
c51360.graph_c0	0	0	95	8.45098	2.0195e-13	6.0336	up
c52146.graph_c0	86	8.56685	0	0	1.11022e-16	-6.18731	down
c52254.graph_c0	60	4.20671	17	1.12355	0.000931596	-2.02762	down
c52459.graph_c0	24	2.37566	0	0	1.87049e-05	-4.39627	down
c52623.graph_c0	21	2.80444	0	0	0.000101257	-4.21338	down
c53244.graph_c0	25	2.78687	0	0	1.07965e-05	-4.45242	down
c54367.graph_c0	45	5.58173	0	0	5.89976e-10	-5.27083	down
c55571.graph_c0	0	0	25	3.01248	0.000564361	4.16798	up
c55753.graph_c0	0	0	25	1.74594	0.000564361	4.16798	up
c56114.graph_c0	20	1.59271	1	0.0750685	0.0013279	-3.39924	down
c56707.graph_c0	23	1.99908	0	0	3.26206e-05	-4.33784	down
c57113.graph_c0	17	1.43583	0	0	0.00106324	-3.92671	down
c57556.graph_c0	26	2.2019	2	0.159663	0.000300604	-3.26886	down
c57694.graph_c0	1451	49.6111	323	10.4104	3.95829e-11	-2.46163	down
c57757.graph_c0	26	3.44284	4	0.499293	0.00370107	-2.61266	down
c58039.graph_c0	19	2.65609	0	0	0.000323325	-4.07715	down
c58542.graph_c0	9	1.75467	53	9.74045	0.0046574	2.11789	up
c58835.graph_c0	18	2.85322	0	0	0.000584137	-4.00389	down
c59443.graph_c0	0	0	50	13.7023	5.44331e-08	5.12729	up
c59952.graph_c0	19	1.56062	0	0	0.000323325	-4.07715	down
c59975.graph_c0	4	0.169118	1001	39.8946	0	7.29223	up
c61668.graph_c0	32	2.16378	4	0.254961	0.000282409	-2.90027	down
c63173.graph_c0	16	1.76789	0	0	0.00194985	-3.84516	down
c63446.graph_c0	27	2.90154	3	0.303904	0.000744765	-2.95587	down
c63453.graph_c0	48	2.11197	345	14.3093	8.44729e-09	2.51655	up
c63875.graph_c0	157	17.948	0	0	0	-7.04669	down
c64200.graph_c0	23	2.7083	0	0	3.26206e-05	-4.33784	down
c64878.graph_c0	22	3.20392	0	0	5.72739e-05	-4.27695	down
c65234.graph_c0	0	0	67	11.5932	2.96176e-10	5.53901	up
c65584.graph_c0	10	1.90233	103	18.4703	3.64303e-07	2.92244	up
c66175.graph_c0	23	1.98809	0	0	3.26206e-05	-4.33784	down
c66760.graph_c0	40	3.31591	8	0.62515	0.000706857	-2.42024	down
c66843.graph_c0	18	1.20672	0	0	0.000584137	-4.00389	down
c66967.graph_c0	24	2.71397	0	0	1.87049e-05	-4.39627	down
c68067.graph_c0	0	0	87	17.1339	1.41331e-12	5.90871	up
c68207.graph_c0	0	0	37	1.84679	5.04312e-06	4.70731	up
c68322.graph_c0	37	2.75585	0	0	2.34313e-08	-4.99648	down
c68644.graph_c0	21	3.91197	0	0	0.000101257	-4.21338	down
c69540.graph_c0	51	2.06575	13	0.496367	0.000910328	-2.15018	down
c69937.graph_c0	0	0	28	1.55655	0.000164133	4.32286	up
c70390.graph_c0	0	0	21	1.19436	0.00311915	3.93165	up
c70612.graph_c0	64	2.32644	5	0.17133	6.37759e-09	-3.63192	down
c70759.graph_c0	20	1.84303	1	0.0868668	0.0013279	-3.39924	down
c70830.graph_c0	26	1.90154	4	0.275768	0.00370107	-2.61266	down
c70864.graph_c0	18	4.07258	0	0	0.000584137	-4.00389	down
c71000.graph_c0	25	2.06155	0	0	1.07965e-05	-4.45242	down
c71169.graph_c0	4	0.429122	163	16.4839	3.88578e-15	4.68459	up
c71172.graph_c0	22	1.97511	0	0	5.72739e-05	-4.27695	down
c71606.graph_c0	2530	46.194	765	13.1667	2.12025e-07	-2.02307	down
c71759.graph_c0	66	3.45676	584	28.833	9.98213e-12	2.82358	up
c72281.graph_c0	22	2.18458	0	0	5.72739e-05	-4.27695	down
c72304.graph_c0	28	2.55398	0	0	2.15657e-06	-4.60884	down
c72382.graph_c0	32	1.77218	0	0	2.73691e-07	-4.79407	down
c72589.graph_c0	16	1.668	0	0	0.00194985	-3.84516	down
c72886.graph_c0	1	0.145971	32	4.40321	0.000285857	3.63011	up
c73032.graph_c0	29	4.57374	0	0	1.27608e-06	-4.65742	down
c73050.graph_c1	52	2.47549	7	0.314128	4.36421e-06	-2.95	down
c73116.graph_c0	10	4.45503	80	33.5963	3.14392e-05	2.5637	up
c73802.graph_c0	37	3.49167	0	0	2.34313e-08	-4.99648	down
c73989.graph_c0	29	3.10582	0	0	1.27608e-06	-4.65742	down
c74020.graph_c0	25	4.12977	0	0	1.07965e-05	-4.45242	down
c74187.graph_c0	0	0	292	8.94791	0	7.63863	up
c74368.graph_c0	16	2.07059	0	0	0.00194985	-3.84516	down
c74453.graph_c0	31	6.44442	7	1.37174	0.00769622	-2.22558	down
c74671.graph_c0	0	0	28	1.53348	0.000164133	4.32286	up
c74673.graph_c0	17	2.05978	0	0	0.00106324	-3.92671	down
c75071.graph_c0	1	0.115158	320	34.7373	0	6.89375	up
c75072.graph_c0	26	2.5777	175	16.3549	9.95347e-07	2.39839	up
c75119.graph_c0	2	0.388718	37	6.77887	0.000265416	3.28968	up
c75173.graph_c0	20	2.56706	0	0	0.000180286	-4.14687	down
c75271.graph_c0	20	1.80071	0	0	0.000180286	-4.14687	down
c75343.graph_c0	18	1.72723	0	0	0.000584137	-4.00389	down
c75424.graph_c0	25	1.74306	0	0	1.07965e-05	-4.45242	down
c75438.graph_c0	114	11.4286	26	2.45705	1.3381e-06	-2.36759	down
c75600.graph_c0	47	6.41312	3	0.385873	1.4769e-07	-3.72928	down
c75630.graph_c0	56	7.32261	14	1.72567	0.000433271	-2.18577	down
c76100.graph_c0	8	1.06158	83	10.3822	2.54888e-06	2.89976	up
c76163.graph_c0	46	4.24833	0	0	3.79785e-10	-5.30172	down
c76228.graph_c0	24	3.56977	0	0	1.87049e-05	-4.39627	down
c76536.graph_c0	17	1.59231	0	0	0.00106324	-3.92671	down
c76608.graph_c0	16	1.73129	0	0	0.00194985	-3.84516	down
c76805.graph_c0	43	7.77922	0	0	1.44185e-09	-5.20697	down
c76918.graph_c0	68	2.84433	2	0.0788592	9.54614e-12	-4.61614	down
c77043.graph_c0	22	4.21066	3	0.541253	0.00752013	-2.67426	down
c77101.graph_c0	23	2.2875	0	0	3.26206e-05	-4.33784	down
c77297.graph_c0	0	0	248	20.4895	0	7.40429	up
c77404.graph_c0	0	0	21	2.00699	0.00311915	3.93165	up
c77744.graph_c0	19	2.34745	0	0	0.000323325	-4.07715	down
c77846.graph_c0	36	2.856	2	0.149567	2.84327e-06	-3.72061	down
c78154.graph_c0	31	2.33529	6	0.426071	0.0033218	-2.40677	down
c78181.graph_c0	82	2.44865	5	0.140746	2.18162e-11	-3.98365	down
c78516.graph_c0	23	6.01751	0	0	3.26206e-05	-4.33784	down
c78623.graph_c0	20	3.05447	0	0	0.000180286	-4.14687	down
c78648.graph_c0	81	5.03227	0	0	6.66134e-16	-6.10212	down
c78962.graph_c0	17	3.70597	0	0	0.00106324	-3.92671	down
c79014.graph_c0	2003	44.1267	479	9.94734	2.72987e-10	-2.36006	down
c79347.graph_c0	0	0	19	2.23483	0.00753094	3.79718	up
c79356.graph_c0	42	9.15594	5	1.02748	1.66842e-05	-3.03804	down
c79407.graph_c0	7	3.46253	44	20.5164	0.00847446	2.17235	up
c79470.graph_c0	9	0.456585	334	15.9727	0	4.74048	up
c80006.graph_c0	49	4.99209	0	0	1.03805e-10	-5.39063	down
c80086.graph_c0	17	1.87838	0	0	0.00106324	-3.92671	down
c80250.graph_c0	0	0	25	2.33641	0.000564361	4.16798	up
c80311.graph_c0	18	2.11954	0	0	0.000584137	-4.00389	down
c80344.graph_c0	41	6.08393	0	0	3.58564e-09	-5.14017	down
c80470.graph_c0	16	2.39689	0	0	0.00194985	-3.84516	down
c80605.graph_c0	18	1.45	0	0	0.000584137	-4.00389	down
c80619.graph_c0	0	0	20	2.20344	0.00483655	3.86598	up
c80842.graph_c0	35	1.28418	297	10.2722	9.08245e-10	2.74411	up
c80857.graph_c0	110	5.60678	4	0.192191	1.77636e-15	-4.64428	down
c81220.graph_c0	139	7.95414	2	0.107885	0	-5.63482	down
c81470.graph_c0	1	0.292072	34	9.36096	0.00013809	3.71383	up
c81544.graph_c0	43	5.54186	10	1.21489	0.00126375	-2.24529	down
c81619.graph_c0	4	0.797194	37	6.95116	0.00352123	2.58865	up
c81801.graph_c0	23	3.02643	0	0	3.26206e-05	-4.33784	down
c82049.graph_c0	25	1.53493	0	0	1.07965e-05	-4.45242	down
c82543.graph_c0	26	3.225	0	0	6.27195e-06	-4.50646	down
c82830.graph_c0	1	0.0547045	23	1.18605	0.00876948	3.1783	up
c82856.graph_c0	2	0.0899547	46	1.95031	1.44246e-05	3.59295	up
c82944.graph_c0	63	13.1841	0	0	3.76477e-13	-5.74554	down
c83174.graph_c0	54	6.11747	13	1.38827	0.00038895	-2.23081	down
c83208.graph_c0	18	1.42081	0	0	0.000584137	-4.00389	down
c83742.graph_c1	43	10.0741	6	1.32508	3.56681e-05	-2.8638	down
c84158.graph_c0	42	3.58469	5	0.402276	1.66842e-05	-3.03804	down
c84308.graph_c0	44	2.13846	9	0.412327	0.000420395	-2.40914	down
c84328.graph_c0	16	2.65705	0	0	0.00194985	-3.84516	down
c84332.graph_c0	47	3.65471	9	0.659705	0.000157099	-2.50186	down
c84432.graph_c0	27	6.75417	0	0	3.66649e-06	-4.55856	down
c84684.graph_c0	31	2.38689	2	0.145162	2.78592e-05	-3.51234	down
c84809.graph_c0	29	4.23317	1	0.1376	1.2355e-05	-3.90979	down
c84909.graph_c0	21	2.21129	0	0	0.000101257	-4.21338	down
c84982.graph_c0	35	2.85613	4	0.307696	8.03911e-05	-3.02509	down
c85295.graph_c0	48	4.73391	12	1.11561	0.00111716	-2.16808	down
c85444.graph_c0	142	5.9795	4	0.158777	0	-5.00916	down
c85467.graph_c0	61	6.79995	0	0	8.07132e-13	-5.69988	down
c85606.graph_c0	19	1.95156	0	0	0.000323325	-4.07715	down
c85831.graph_c0	28	4.24526	0	0	2.15657e-06	-4.60884	down
c85914.graph_c0	18	3.99336	0	0	0.000584137	-4.00389	down
c85945.graph_c0	94	6.06829	8	0.486832	4.79548e-11	-3.62862	down
c85968.graph_c0	30	2.03953	0	0	7.59518e-07	-4.70443	down
c85999.graph_c0	0	0	23	1.80926	0.00131475	4.05465	up
c86222.graph_c0	7	0.192788	254	6.59427	0	4.66245	up
c86277.graph_c0	16	2.62234	0	0	0.00194985	-3.84516	down
c86284.graph_c0	19	3.11403	0	0	0.000323325	-4.07715	down
c86679.graph_c0	41	1.03221	720	17.087	0	3.79619	up
c86719.graph_c0	559	31.5709	0	0	0	-8.8709	down
c86724.graph_c0	19	0.861363	114	4.87179	5.277e-05	2.21581	up
c86741.graph_c0	130	21.2233	0	0	0	-6.7767	down
c86783.graph_c0	178	3.14033	1226	20.389	5.18044e-10	2.47652	up
c86842.graph_c0	48	9.47602	3	0.558287	9.95931e-08	-3.7589	down
c86933.graph_c1	835168	6240.95	33365	235.028	0	-4.94516	down
c87015.graph_c0	3553	235.674	747	46.7077	4.8137e-12	-2.54706	down
c87031.graph_c0	80	9.6744	1	0.113995	1.64313e-14	-5.33683	down
c87275.graph_c0	1	0.0165137	11751	182.924	0	12.0859	up
c87310.graph_c0	1	0.0486014	808	37.0178	0	8.22604	up
c87400.graph_c0	83	3.24055	1206	44.3853	0	3.54253	up
c87511.graph_c0	546611	12194.5	41556	873.918	0	-4.0169	down
c87516.graph_c0	2016	139.938	20966	1371.87	2.9976e-15	3.07817	up
c87543.graph_c0	20	2.73792	0	0	0.000180286	-4.14687	down
c87614.graph_c0	19	1.82599	0	0	0.000323325	-4.07715	down
c87631.graph_c0	0	0	19	1.04639	0.00753094	3.79718	up
c87641.graph_c0	19	2.2415	0	0	0.000323325	-4.07715	down
c87703.graph_c0	20	2.9538	0	0	0.000180286	-4.14687	down
c87707.graph_c0	4	0.27858	34	2.23213	0.00868635	2.47152	up
c87732.graph_c0	18	1.57322	0	0	0.000584137	-4.00389	down
c88131.graph_c0	17	2.26063	0	0	0.00106324	-3.92671	down
c88132.graph_c0	16	2.27731	0	0	0.00194985	-3.84516	down
c88212.graph_c0	16	3.14876	0	0	0.00194985	-3.84516	down
c88448.graph_c0	28	5.6888	0	0	2.15657e-06	-4.60884	down
c88462.graph_c0	30	2.88313	3	0.271779	0.000191593	-3.10173	down
c88521.graph_c0	23	1.94783	3	0.239495	0.00471925	-2.73515	down
c88598.graph_c0	24	3.45516	1	0.135709	0.000157949	-3.64864	down
c88789.graph_c0	0	0	22	1.45076	0.00202048	3.99446	up
c88861.graph_c0	25	2.78192	0	0	1.07965e-05	-4.45242	down
c88956.graph_c0	22	2.0824	0	0	5.72739e-05	-4.27695	down
c89043.graph_c0	65	4.0072	16	0.929821	0.000145434	-2.22122	down
c89418.graph_c0	22	2.82956	0	0	5.72739e-05	-4.27695	down
c89452.graph_c0	32	5.16373	0	0	2.73691e-07	-4.79407	down
c89486.graph_c0	19	2.11802	0	0	0.000323325	-4.07715	down
c89503.graph_c0	0	0	20	1.48069	0.00483655	3.86598	up
c89556.graph_c0	42	2.27772	0	0	2.26871e-09	-5.17396	down
c89666.graph_c0	38	1.78063	10	0.441715	0.00624155	-2.07208	down
c89756.graph_c0	3	0.169432	33	1.75687	0.00389219	2.73862	up
c89762.graph_c0	33	7.16904	0	0	1.65659e-07	-4.83689	down
c89940.graph_c0	19	1.53253	0	0	0.000323325	-4.07715	down
c89942.graph_c0	16	2.02874	0	0	0.00194985	-3.84516	down
c90064.graph_c0	83	3.96631	7	0.315325	2.75426e-10	-3.61243	down
c90065.graph_c0	22	2.91317	2	0.249646	0.00215622	-3.03935	down
c90113.graph_c0	16	2.8174	0	0	0.00194985	-3.84516	down
c90201.graph_c0	22	2.70743	0	0	5.72739e-05	-4.27695	down
c90278.graph_c0	17	2.69471	0	0	0.00106324	-3.92671	down
c90325.graph_c0	28	1.5344	3	0.154972	0.000472306	-3.00615	down
c90604.graph_c0	0	0	32	4.08047	3.35661e-05	4.50646	up
c90739.graph_c0	24	2.15158	0	0	1.87049e-05	-4.39627	down
c90860.graph_c0	67	1.75144	19	0.468195	0.000515231	-2.03556	down
c90911.graph_c0	0	0	19	1.79554	0.00753094	3.79718	up
c91114.graph_c0	17	2.63479	1	0.146099	0.00688884	-3.17908	down
c91146.graph_c0	46	7.70016	1	0.157795	5.01267e-09	-4.55409	down
c91171.graph_c0	21	1.58197	1	0.0710119	0.000774012	-3.46575	down
c91253.graph_c0	23	1.618	3	0.19894	0.00471925	-2.73515	down
c91376.graph_c0	18	5.16118	0	0	0.000584137	-4.00389	down
c91452.graph_c0	17	1.90864	0	0	0.00106324	-3.92671	down
c91495.graph_c0	24	1.18572	139	6.47349	2.72321e-05	2.17943	up
c91673.graph_c0	9	1.01051	91	9.63142	1.36487e-06	2.88139	up
c91720.graph_c0	21	1.94375	0	0	0.000101257	-4.21338	down
c91808.graph_c0	1	0.0463738	25	1.09286	0.00401813	3.29163	up
c91838.graph_c0	57	16.2324	0	0	3.85558e-12	-5.60397	down
c92004.graph_c0	45	4.17133	5	0.436901	5.34578e-06	-3.13491	down
c92036.graph_c0	7	0.266985	55	1.97744	0.000550772	2.4849	up
c92278.graph_c0	19	1.34871	0	0	0.000323325	-4.07715	down
c92420.graph_c0	19	2.28885	0	0	0.000323325	-4.07715	down
c92621.graph_c0	1	0.116225	23	2.51987	0.00876948	3.1783	up
c92667.graph_c0	24	3.63002	0	0	1.87049e-05	-4.39627	down
c92764.graph_c0	34	7.28536	0	0	1.00808e-07	-4.87848	down
c93151.graph_c0	28	3.50776	0	0	2.15657e-06	-4.60884	down
c93206.graph_c0	27	3.6445	0	0	3.66649e-06	-4.55856	down
c93357.graph_c0	94	9.58445	0	0	0	-6.31395	down
c93481.graph_c0	31	2.0738	0	0	4.54657e-07	-4.74995	down
c93602.graph_c0	16	1.44264	0	0	0.00194985	-3.84516	down
c93831.graph_c1	47	9.2272	8	1.48052	6.45548e-05	-2.64665	down
c93850.graph_c0	48	2.02668	0	0	1.59317e-10	-5.3616	down
c93889.graph_c0	31	1.61822	0	0	4.54657e-07	-4.74995	down
c93891.graph_c0	0	0	32	2.70233	3.35661e-05	4.50646	up
c94103.graph_c0	31	7.0777	0	0	4.54657e-07	-4.74995	down
c94313.graph_c0	22	2.35614	0	0	5.72739e-05	-4.27695	down
c94324.graph_c0	61	2.82254	8	0.348941	6.68926e-07	-3.01455	down
c94379.graph_c0	31	2.03262	4	0.247233	0.0004314	-2.85615	down
c94520.graph_c0	25	2.31058	0	0	1.07965e-05	-4.45242	down
c94556.graph_c0	18	1.92447	0	0	0.000584137	-4.00389	down
c94660.graph_c0	20	1.4923	1	0.0703362	0.0013279	-3.39924	down
c94871.graph_c0	51	4.99312	0	0	4.45819e-11	-5.447	down
c94880.graph_c0	0	0	25	1.80786	0.000564361	4.16798	up
c94886.graph_c0	28	1.78487	357	21.452	1.32561e-13	3.31843	up
c94970.graph_c0	20	2.53593	2	0.23905	0.00588497	-2.90927	down
c95063.graph_c0	35	1.83773	4	0.197982	8.03911e-05	-3.02509	down
c95124.graph_c0	30	2.41358	0	0	7.59518e-07	-4.70443	down
c95212.graph_c0	39	3.37111	10	0.814817	0.00453484	-2.10843	down
c95276.graph_c0	21	2.32855	0	0	0.000101257	-4.21338	down
c95284.graph_c0	43	4.67705	11	1.12784	0.00255971	-2.12472	down
c95289.graph_c0	0	0	30	1.63243	7.3616e-05	4.41758	up
c95323.graph_c0	21	3.81014	1	0.17103	0.000774012	-3.46575	down
c95492.graph_c0	11	0.729641	115	7.19061	1.1075e-07	2.95589	up
c95553.graph_c0	27	1.55428	4	0.217058	0.00239963	-2.66476	down
c95555.graph_c0	22	2.17769	0	0	5.72739e-05	-4.27695	down
c95621.graph_c0	21	2.136	0	0	0.000101257	-4.21338	down
c95669.graph_c0	19	3.12218	1	0.154902	0.00228905	-3.32952	down
c95679.graph_c0	0	0	28	1.58183	0.000164133	4.32286	up
c95700.graph_c0	18	2.03182	0	0	0.000584137	-4.00389	down
c95719.graph_c0	30	0.965725	224	6.79722	4.65086e-08	2.55393	up
c95774.graph_c0	20	2.60436	0	0	0.000180286	-4.14687	down
c95783.graph_c0	30	2.5304	0	0	7.59518e-07	-4.70443	down
c95801.graph_c0	31	2.62534	6	0.47899	0.0033218	-2.40677	down
c95821.graph_c0	0	0	338	21.44	0	7.8487	up
c95831.graph_c0	24	2.19551	0	0	1.87049e-05	-4.39627	down
c95848.graph_c0	36	2.23656	0	0	3.7917e-08	-4.95821	down
c95864.graph_c0	31	4.57838	0	0	4.54657e-07	-4.74995	down
c95875.graph_c0	16	2.77457	0	0	0.00194985	-3.84516	down
c95881.graph_c0	20	2.22949	0	0	0.000180286	-4.14687	down
c95905.graph_c0	26	2.50255	0	0	6.27195e-06	-4.50646	down
c96001.graph_c0	23	2.1705	0	0	3.26206e-05	-4.33784	down
c96020.graph_c0	273	6.49502	63	1.4129	9.11049e-09	-2.38801	down
c96070.graph_c0	19	1.76383	0	0	0.000323325	-4.07715	down
c96075.graph_c0	30	2.5719	0	0	7.59518e-07	-4.70443	down
c96109.graph_c0	0	0	23	3.79115	0.00131475	4.05465	up
c96122.graph_c0	39	1.58996	7	0.269011	0.000416469	-2.54574	down
c96138.graph_c0	21	2.1712	0	0	0.000101257	-4.21338	down
c96202.graph_c0	8299	246.181	779	21.783	0	-3.71029	down
c96213.graph_c0	27	2.05369	3	0.215102	0.000744765	-2.95587	down
c96265.graph_c0	32	2.47299	0	0	2.73691e-07	-4.79407	down
c96299.graph_c0	184	14.3791	33	2.43097	7.63845e-10	-2.72509	down
c96318.graph_c0	5266	216.515	779	30.1922	0	-3.05418	down
c96353.graph_c0	16	2.39689	0	0	0.00194985	-3.84516	down
c96382.graph_c0	26	2.08109	2	0.150903	0.000300604	-3.26886	down
c96389.graph_c0	18	2.89343	0	0	0.000584137	-4.00389	down
c96409.graph_c0	28	3.11024	0	0	2.15657e-06	-4.60884	down
c96429.graph_c0	35	2.90576	3	0.234782	2.11838e-05	-3.3162	down
c96609.graph_c0	21	3.33719	0	0	0.000101257	-4.21338	down
c96681.graph_c0	19	2.1681	0	0	0.000323325	-4.07715	down
c96702.graph_c0	21	2.20759	0	0	0.000101257	-4.21338	down
c96710.graph_c0	23	2.29113	0	0	3.26206e-05	-4.33784	down
c96812.graph_c0	3	0.26262	202	16.669	0	5.29993	up
c96852.graph_c0	3	0.391605	34	4.18367	0.00281961	2.77987	up
c96956.graph_c0	64	3.29425	0	0	2.58238e-13	-5.76784	down
c96988.graph_c0	1035	40.259	11835	433.952	2.22045e-16	3.21431	up
c96997.graph_c0	17	2.75031	0	0	0.00106324	-3.92671	down
c97005.graph_c0	26	2.54155	0	0	6.27195e-06	-4.50646	down
c97016.graph_c0	26	2.25671	0	0	6.27195e-06	-4.50646	down
c97034.graph_c0	82	7.16689	20	1.64778	2.9139e-05	-2.25358	down
c97073.graph_c0	2	0.223744	28	2.95278	0.00587973	2.90523	up
c97162.graph_c0	3	0.2892	45	4.08922	9.08348e-05	3.16955	up
c97300.graph_c0	797	240.624	4129	1175.1	4.76193e-07	2.07193	up
c97310.graph_c0	94	13.5951	0	0	0	-6.31395	down
c97396.graph_c1	165	59.2177	850	287.566	7.18154e-07	2.05751	up
c97434.graph_c0	33	2.50097	0	0	1.65659e-07	-4.83689	down
c97435.graph_c0	38	3.57491	1	0.0886815	1.69689e-07	-4.28614	down
c97484.graph_c0	16	2.51082	0	0	0.00194985	-3.84516	down
c97535.graph_c0	0	0	21	3.47106	0.00311915	3.93165	up
c97539.graph_c0	24	2.57473	0	0	1.87049e-05	-4.39627	down
c97557.graph_c0	50	3.46302	0	0	6.78987e-11	-5.41909	down
c97749.graph_c0	38	3.10903	0	0	1.45511e-08	-5.03377	down
c97756.graph_c0	0	0	60	5.12172	2.32775e-09	5.38343	up
c97824.graph_c0	0	0	26	6.05854	0.000372267	4.22148	up
c97978.graph_c0	25	4.79949	0	0	1.07965e-05	-4.45242	down
c97991.graph_c0	20	1.83494	1	0.0864857	0.0013279	-3.39924	down
c98234.graph_c0	21	2.5543	0	0	0.000101257	-4.21338	down
c98297.graph_c0	35	5.17328	0	0	6.16667e-08	-4.91889	down
c98476.graph_c1	39	2.52029	0	0	9.07997e-09	-5.07011	down
c98509.graph_c0	106	22.0358	0	0	0	-6.48523	down
c98633.graph_c0	8	1.67417	56	11.0471	0.00105346	2.34415	up
c98668.graph_c0	3	0.144683	62	2.81864	6.98573e-07	3.6193	up
c98688.graph_c0	89	6.46392	18	1.23234	1.69199e-06	-2.51118	down
c98692.graph_c0	20	2.24144	0	0	0.000180286	-4.14687	down
c98700.graph_c0	18	2.38855	0	0	0.000584137	-4.00389	down
c98730.graph_c0	18	1.54949	0	0	0.000584137	-4.00389	down
c98815.graph_c0	87	5.8273	24	1.51534	8.89648e-05	-2.09133	down
c99009.graph_c0	641	12.3812	145	2.64012	2.44354e-10	-2.43194	down
c99012.graph_c0	34	3.30297	0	0	1.00808e-07	-4.87848	down
c99017.graph_c0	41	4.77407	0	0	3.58564e-09	-5.14017	down
c99019.graph_c0	29	1.43501	6	0.279872	0.00718593	-2.31425	down
c99033.graph_c0	4	0.414546	42	4.10312	0.000798123	2.76492	up
c99075.graph_c0	22	2.46559	0	0	5.72739e-05	-4.27695	down
c99231.graph_c0	45	7.73929	0	0	5.89976e-10	-5.27083	down
c99407.graph_c0	20	2.65394	0	0	0.000180286	-4.14687	down
c99458.graph_c0	39	4.40766	8	0.852286	0.000999575	-2.38479	down
c99486.graph_c0	0	0	32	0.887673	3.35661e-05	4.50646	up
c99501.graph_c0	51	5.71568	0	0	4.45819e-11	-5.447	down
c99518.graph_c0	319	24.412	41	2.95766	7.32747e-15	-3.21391	down
c99521.graph_c0	47	2.229	13	0.581176	0.00284377	-2.03516	down
c99539.graph_c0	26	1.68366	3	0.183128	0.00117757	-2.90377	down
c99540.graph_c0	39	3.6584	0	0	9.07997e-09	-5.07011	down
c99617.graph_c0	20	2.22949	0	0	0.000180286	-4.14687	down
c99619.graph_c0	2	0.0945652	49	2.18398	5.69368e-06	3.68135	up
c99662.graph_c0	26	3.33036	0	0	6.27195e-06	-4.50646	down
c99666.graph_c0	31	2.46557	0	0	4.54657e-07	-4.74995	down
c99687.graph_c0	34	1.296	8	0.287453	0.00570589	-2.19315	down
c99688.graph_c0	27	2.83358	0	0	3.66649e-06	-4.55856	down
c99690.graph_c0	17	1.92935	0	0	0.00106324	-3.92671	down
c99697.graph_c0	28	2.41696	0	0	2.15657e-06	-4.60884	down
c99755.graph_c0	31	2.19555	0	0	4.54657e-07	-4.74995	down
c99816.graph_c0	35	3.20179	0	0	6.16667e-08	-4.91889	down
c99835.graph_c0	93	2.61295	1	0.0264849	2.22045e-16	-5.55108	down
c99837.graph_c0	37	3.15477	0	0	2.34313e-08	-4.99648	down
c99867.graph_c0	44	2.67529	12	0.687781	0.00364142	-2.04574	down
c99868.graph_c0	16	2.92837	0	0	0.00194985	-3.84516	down
c99889.graph_c0	22	3.15997	0	0	5.72739e-05	-4.27695	down

## Sheet: AF-vs-TF annotation
#ID	AF_count	AF_FPKM	TF_count	TF_FPKM	FDR	log2FC	regulated	COG_class	COG_class_annotation	GO_annotation	KEGG_annotation	KOG_class	KOG_class_annotation	Pfam_annotation	Swissprot_annotation	nr_annotation
c87275.graph_c0	1	0.0165137	11751	182.924	0	12.0859	up	[P]	Inorganic ion transport and metabolism	Molecular Function: calcium-transporting ATPase activity (GO:0005388);; Molecular Function: calcium ion binding (GO:0005509);; Molecular Function: ATP binding (GO:0005524);; Cellular Component: endoplasmic reticulum-Golgi intermediate compartment (GO:0005793);; Biological Process: ATP catabolic process (GO:0006200);; Biological Process: calcium ion transport (GO:0006816);; Cellular Component: int…	K05853|0|xtr:613090|atp2a1, atp2a, atp2a2, atp2b, ca-p60a, dar, serca1, serca2; ATPase, Ca++ transporting, cardiac muscle, fast twitch 1; K05853 Ca2+ transporting ATPase, sarcoplasmic/endoplasmic reticulum [EC:3.6.3.8] (A)	[P]	Inorganic ion transport and metabolism	E1-E2 ATPase;; Cation transporting ATPase, C-terminus;; haloacid dehalogenase-like hydrolase;; Putative hydrolase of sodium-potassium ATPase alpha subunit;; Cation transporter/ATPase, N-terminus;; haloacid dehalogenase-like hydrolase;; haloacid dehalogenase-like hydrolase	Sarcoplasmic/endoplasmic reticulum calcium ATPase 1 GN=ATP2A1 OS=Pelophylax esculentus (Edible frog) PE=2 SV=1	ATPase, Ca++ transporting, cardiac muscle, fast twitch 1 [Xenopus (Silurana) tropicalis]
c115995.graph_c0	2	0.0208326	2904	28.5143	0	9.52848	up	[Z]	Cytoskeleton	Molecular Function: motor activity (GO:0003774);; Molecular Function: actin binding (GO:0003779);; Molecular Function: ATP binding (GO:0005524);; Cellular Component: myosin complex (GO:0016459);;	K10352|0|xtr:448762|myh3, myh2; myosin, heavy chain 3, skeletal muscle, embryonic; K10352 myosin heavy chain (A)	[Z]	Cytoskeleton	Myosin tail;; Myosin head (motor domain);; Myosin N-terminal SH3-like domain	Myosin-3 GN=MYH3 OS=Gallus gallus (Chicken) PE=2 SV=3	myosin heavy chain IIa [Xenopus (Silurana) tropicalis]
c122569.graph_c1	0	0	847	5.40241	0	9.17028	up	[RTKL]	--	--	K12567|0|cmy:102929944|titin-like; K12567 titin [EC:2.7.11.1] (A)	[Z]	Cytoskeleton	Immunoglobulin I-set domain;; Fibronectin type III domain;; Immunoglobulin domain;; Immunoglobulin domain;; Protein kinase domain;; Immunoglobulin V-set domain;; Immunoglobulin domain;; Protein tyrosine kinase;; CD80-like C2-set immunoglobulin domain;; Immunoglobulin C1-set domain;; Natural killer cell receptor 2B4	Myosin light chain kinase, smooth muscle, deglutamylated form GN=Mylk OS=Gallus gallus (Chicken) PE=1 SV=2	PREDICTED: titin isoform X4 [Chrysemys picta bellii]
c122853.graph_c0	0	0	833	39.0713	0	9.14627	up	[J]	Translation, ribosomal structure and biogenesis	Molecular Function: structural constituent of ribosome (GO:0003735);; Cellular Component: ribosome (GO:0005840);; Biological Process: translation (GO:0006412);;	K02925|0|xla:494722|rpl3l; ribosomal protein L3-like; K02925 large subunit ribosomal protein L3e (A)	[J]	Translation, ribosomal structure and biogenesis	Ribosomal protein L3	--	ribosomal protein L3-like [Xenopus laevis]
c87310.graph_c0	1	0.0486014	808	37.0178	0	8.22604	up	--	--	Cellular Component: troponin complex (GO:0005861);; Biological Process: regulation of striated muscle contraction (GO:0006942);;	K12046|1.68646e-123|xtr:394748|tnnt3, amcd2b, da2b, fssv; troponin T type 3 (skeletal, fast); K12046 troponin T, fast skeletal muscle (A)	[Z]	Cytoskeleton	Troponin	Troponin T, fast skeletal muscle isoforms GN=TNNT3 OS=Gallus gallus (Chicken) PE=1 SV=3	troponin T [Hyla chrysoscelis]
c122549.graph_c0	1	0.0248715	720	16.8805	0	8.06	up	--	--	--	K17531|0|xtr:101730564|obscurin-like; K17531 Obscurin-RhoGEF [EC:2.7.11.1] (A)	--	--	Immunoglobulin I-set domain;; Immunoglobulin domain;; Immunoglobulin domain;; Immunoglobulin domain;; RhoGEF domain;; Immunoglobulin V-set domain;; CD80-like C2-set immunoglobulin domain;; Penicillin-Binding Protein C-terminus Family;; PH domain;; Immunoglobulin C1-set domain;; Immunoglobulin I-set domain;; Immunoglobulin domain;; Immunoglobulin domain;; Immunoglobulin domain;; Immunoglobulin V-s…	Triple functional domain protein GN=trio OS=Danio rerio (Zebrafish) PE=3 SV=1	PREDICTED: obscurin-like [Xenopus (Silurana) tropicalis]
c95821.graph_c0	0	0	338	21.44	0	7.8487	up	--	--	Cellular Component: Z disc (GO:0030018);; Biological Process: T-tubule organization (GO:0033292);; Biological Process: heart contraction (GO:0060047);;	--	--	--	Telethonin protein	--	PREDICTED: telethonin isoformX2 [Xenopus (Silurana) tropicalis]
c26408.graph_c0	0	0	330	27.0376	0	7.8143	up	[TZDR]	--	Molecular Function: calcium ion binding (GO:0005509);; Cellular Component: myosin complex (GO:0016459);;	K12758|1.53697e-110|xtr:394763|mylpf, SkMLC, myl2; myosin light chain, phosphorylatable, fast skeletal muscle; K12758 fast skeletal myosin light chain 2 (A)	[Z]	Cytoskeleton	EF-hand domain pair;; EF hand;; EF-hand domain;; EF-hand domain pair	Myosin regulatory light chain 2, skeletal muscle isoform GN=MYLPF OS=Gallus gallus (Chicken) PE=1 SV=2	myosin light chain, phosphorylatable, fast skeletal muscle [Xenopus (Silurana) tropicalis]
c122942.graph_c0	0	0	317	25.0362	0	7.75658	up	--	--	Biological Process: regulation of the force of heart contraction (GO:0002026);; Biological Process: cardiac muscle hypertrophy (GO:0003300);; Biological Process: cellular calcium ion homeostasis (GO:0006874);; Molecular Function: zinc ion binding (GO:0008270);; Molecular Function: structural constituent of muscle (GO:0008307);; Cellular Component: Z disc (GO:0030018);; Molecular Function: teletho…	K09377|1.60027e-126|xtr:448578|csrp3, CRP3, MLP, csrp2; cysteine and glycine-rich protein 3 (cardiac LIM protein); K09377 cysteine and glycine-rich protein (A)	[TZ]	--	LIM domain	Cysteine and glycine-rich protein 2 GN=CSRP2 OS=Gallus gallus (Chicken) PE=2 SV=3	cysteine and glycine-rich protein 3 (cardiac LIM protein) [Xenopus (Silurana) tropicalis]
c74187.graph_c0	0	0	292	8.94791	0	7.63863	up	--	--	Molecular Function: ubiquitin-protein transferase activity (GO:0004842);; Cellular Component: cytoplasm (GO:0005737);; Molecular Function: zinc ion binding (GO:0008270);; Biological Process: regulation of gene expression (GO:0010468);; Biological Process: protein ubiquitination (GO:0016567);; Molecular Function: titin binding (GO:0031432);; Biological Process: proteasome-mediated ubiquitin-depend…	K10655|0|xla:100036938|uncharacterized LOC100036938; K10655 tripartite motif-containing protein 63 [EC:6.3.2.19] (A)	[O]	Posttranslational modification, protein turnover, chaperones	Zinc finger, C3HC4 type (RING finger);; RING-type zinc-finger;; Ring finger domain;; Zinc finger, C3HC4 type (RING finger);; Zinc finger, C3HC4 type (RING finger);; zinc-RING finger domain;; B-box zinc finger	Tripartite motif containing 13 GN=trim13 OS=Xenopus tropicalis (Western clawed frog) PE=3 SV=1	uncharacterized protein LOC100036938 [Xenopus laevis]
c105949.graph_c0	0	0	256	10.2097	0	7.44983	up	--	--	--	--	--	--	Calcineurin-binding protein (Calsarcin)	--	Myozenin-1-like [Xenopus laevis]
c122547.graph_c1	1	0.0523476	470	23.1924	0	7.44623	up	--	--	--	K18267|0|xtr:100491666|neb; nebulin; K18267 nebulin (A)	[Z]	Cytoskeleton	Nebulin repeat	--	PREDICTED: nebulin isoform X1 [Xenopus (Silurana) tropicalis]
c77297.graph_c0	0	0	248	20.4895	0	7.40429	up	--	--	Molecular Function: structural constituent of eye lens (GO:0005212);; Cellular Component: nucleus (GO:0005634);; Cellular Component: cytoplasm (GO:0005737);; Molecular Function: protein homodimerization activity (GO:0042803);;	K09542|7.94137e-92|xtr:100494296|alpha-crystallin B chain-like; K09542 crystallin, alpha B (A)	[O]	Posttranslational modification, protein turnover, chaperones	Hsp20/alpha crystallin family;; Alpha crystallin A chain, N terminal	Alpha-crystallin B chain GN=CRYAB OS=Squalus acanthias (Spiny dogfish) PE=1 SV=1	PREDICTED: alpha-crystallin B chain-like [Xenopus (Silurana) tropicalis]
c101328.graph_c0	0	0	245	11.9959	0	7.38684	up	--	--	Cellular Component: intracellular (GO:0005622);; Molecular Function: zinc ion binding (GO:0008270);;	K10653|0|xla:432166|trim54, murf, murf-3, rnf30; tripartite motif containing 54; K10653 tripartite motif-containing protein 54 (A)	[O]	Posttranslational modification, protein turnover, chaperones	Zinc finger, C3HC4 type (RING finger);; RING-type zinc-finger;; Ring finger domain;; Zinc finger, C3HC4 type (RING finger);; Zinc finger, C3HC4 type (RING finger);; zinc-RING finger domain;; B-box zinc finger	Tripartite motif containing 13 GN=trim13 OS=Xenopus tropicalis (Western clawed frog) PE=3 SV=1	tripartite motif containing 54 [Xenopus laevis]
c59975.graph_c0	4	0.169118	1001	39.8946	0	7.29223	up	[K]	Transcription	Molecular Function: DNA binding (GO:0003677);; Biological Process: regulation of transcription, DNA-templated (GO:0006355);;	K06099|5.43867e-65|xtr:548572|ybx3, csda, csda1, dbpa, zonab; Y box binding protein 3; K06099 cold shock domain protein A (A)	[J]	Translation, ribosomal structure and biogenesis	'Cold-shock' DNA-binding domain	Y-box-binding protein 2-A GN=ybx2-a OS=Xenopus laevis (African clawed frog) PE=1 SV=3	cold shock domain protein A, partial [Spea bombifrons]
c121033.graph_c0	3	0.083661	792	20.8199	0	7.26327	up	--	--	Molecular Function: actin binding (GO:0003779);; Cellular Component: fascia adherens (GO:0005916);; Cellular Component: muscle tendon junction (GO:0005927);; Molecular Function: zinc ion binding (GO:0008270);; Molecular Function: vinculin binding (GO:0017166);; Cellular Component: myofibril (GO:0030016);; Molecular Function: muscle alpha-actinin binding (GO:0051371);;	--	[Z]	Cytoskeleton	Nebulin repeat	--	PREDICTED: nebulin-related-anchoring protein [Xenopus (Silurana) tropicalis]
c122547.graph_c2	0	0	203	13.9033	0	7.11732	up	--	--	--	K18267|0|xtr:100491666|neb; nebulin; K18267 nebulin (A)	[Z]	Cytoskeleton	Nebulin repeat	--	PREDICTED: nebulin isoform X23 [Xenopus (Silurana) tropicalis]
c122833.graph_c0	0	0	189	39.1107	0	7.01499	up	--	--	Molecular Function: ATP binding (GO:0005524);; Cellular Component: cytoplasm (GO:0005737);; Cellular Component: cytoskeleton (GO:0005856);; Biological Process: embryonic heart tube development (GO:0035050);;	--	[Z]	Cytoskeleton	--	Actin, alpha skeletal muscle (Fragment) OS=Pleurodeles waltl (Iberian ribbed newt) PE=2 SV=1	cardiac muscle alpha actin 1 [Hemiscyllium ocellatum]
c75071.graph_c0	1	0.115158	320	34.7373	0	6.89375	up	[Z]	Cytoskeleton	--	K11652|1.26842e-74|xtr:100127559|uncharacterized LOC100127559; K11652 actin-like protein 6B (A)	[Z]	Cytoskeleton	Actin	Actin, alpha skeletal muscle (Fragment) OS=Pleurodeles waltl (Iberian ribbed newt) PE=2 SV=1	uncharacterized protein LOC100127559 [Xenopus (Silurana) tropicalis]
c38518.graph_c0	0	0	161	17.2242	0	6.78561	up	--	--	Molecular Function: transporter activity (GO:0005215);; Cellular Component: mitochondrial inner membrane (GO:0005743);; Biological Process: apoptotic mitochondrial changes (GO:0008637);; Cellular Component: integral component of membrane (GO:0016021);; Biological Process: transmembrane transport (GO:0055085);; Biological Process: negative regulation of necrotic cell death (GO:0060547);;	K05863|2.20311e-108|mmu:11739|Slc25a4, AU019225, Ant1; solute carrier family 25 (mitochondrial carrier, adenine nucleotide translocator), member 4; K05863 solute carrier family 25 (mitochondrial adenine nucleotide translocator), member 4/5/6/31 (A)	[C]	Energy production and conversion	Mitochondrial carrier protein	Calcium-binding mitochondrial carrier protein SCaMC-1 GN=slc25a24 OS=Xenopus tropicalis (Western clawed frog) PE=2 SV=1	ADP/ATP translocase 1 [Gallus gallus]
c120799.graph_c0	0	0	157	7.78382	0	6.74964	up	[Z]	Cytoskeleton	Molecular Function: actin binding (GO:0003779);; Molecular Function: calcium ion binding (GO:0005509);; Biological Process: actin filament bundle assembly (GO:0051017);; Biological Process: actin crosslink formation (GO:0051764);;	K05699|0|xtr:100216053|actn3; actinin, alpha 3; K05699 actinin alpha (A)	[Z]	Cytoskeleton	Spectrin repeat;; Ca2+ insensitive EF hand;; EF hand;; EF-hand domain;; EF-hand domain pair	Alpha-actinin-2 GN=ACTN2 OS=Gallus gallus (Chicken) PE=2 SV=1	actinin, alpha 3 (gene/pseudogene) [Xenopus (Silurana) tropicalis]
c122569.graph_c0	0	0	148	11.2601	0	6.66529	up	--	--	--	K12567|6.6002e-22|shr:100923152|TTN; titin; K12567 titin [EC:2.7.11.1] (A)	[Z]	Cytoskeleton	Immunoglobulin I-set domain;; Immunoglobulin domain	Myosin-binding protein C, fast-type GN=MYBPC2 OS=Gallus gallus (Chicken) PE=1 SV=3	unnamed protein product [Oncorhynchus mykiss]
c122834.graph_c0	3	0.272058	492	42.0588	0	6.57806	up	[Z]	Cytoskeleton	Molecular Function: ATP binding (GO:0005524);; Cellular Component: cytoplasm (GO:0005737);; Cellular Component: cytoskeleton (GO:0005856);;	K10354|0|xtr:448346|acta1, acta, acta2, asma, cftd, cftd1, cftdm, mpfd, nem1, nem2, nem3; actin, alpha 1, skeletal muscle; K10354 actin, alpha skeletal muscle (A)	[Z]	Cytoskeleton	Actin	Actin, alpha skeletal muscle (Precursor) GN=ACTA1 OS=Gallus gallus (Chicken) PE=1 SV=1	PREDICTED: actin, alpha skeletal muscle-like, partial [Tyto alba]
c122792.graph_c0	0	0	137	34.9541	0	6.55501	up	--	--	Molecular Function: ATP binding (GO:0005524);; Biological Process: ATP catabolic process (GO:0006200);; Biological Process: apoptotic process (GO:0006915);; Molecular Function: ATPase activity (GO:0016887);; Molecular Function: myosin binding (GO:0017022);; Biological Process: skeletal muscle thin filament assembly (GO:0030240);; Cellular Component: I band (GO:0031674);; Biological Process: actin…	K12314|6.25208e-29|acs:100560364|actc1; actin, alpha, cardiac muscle 1; K12314 actin, alpha cardiac muscle (A)	[Z]	Cytoskeleton	Actin	Actin, alpha cardiac muscle 1 (Precursor) GN=actc1 OS=Xenopus laevis (African clawed frog) PE=2 SV=1	PREDICTED: actin, alpha cardiac muscle 1 [Anolis carolinensis]
c45776.graph_c0	0	0	128	8.34771	1.11e-16	6.45806	up	[TZDR]	--	Biological Process: skeletal muscle contraction (GO:0003009);; Molecular Function: actin binding (GO:0003779);; Molecular Function: calcium ion binding (GO:0005509);; Cellular Component: troponin complex (GO:0005861);;	K12042|4.68859e-95|xla:379095|tnnc2; troponin C type 2 (fast); K12042 troponin C, skeletal muscle (A)	[T]	Signal transduction mechanisms	EF hand;; EF-hand domain pair;; EF-hand domain pair;; EF-hand domain;; EF hand;; EF-hand domain;; Cytoskeletal-regulatory complex EF hand;; Secreted protein acidic and rich in cysteine Ca binding region;; Tellurite resistance protein TerB	Troponin C, skeletal muscle OS=Pelophylax esculentus (Edible frog) PE=1 SV=1	fast skeletal troponin C beta [Xenopus laevis]
c111830.graph_c0	0	0	126	6.81233	2.22e-16	6.4356	up	[R]	General function prediction only	Cellular Component: mitochondrial outer membrane (GO:0005741);; Cellular Component: integral component of membrane (GO:0016021);; Molecular Function: oxidoreductase activity (GO:0016491);; Molecular Function: molybdenum ion binding (GO:0030151);; Molecular Function: pyridoxal phosphate binding (GO:0030170);; Biological Process: oxidation-reduction process (GO:0055114);;	--	[R]	General function prediction only	MOSC domain;; MOSC N-terminal beta barrel domain	Mitochondrial amidoxime-reducing component 1 GN=marc1 OS=Xenopus laevis (African clawed frog) PE=2 SV=1	MOSC domain-containing protein 1, mitochondrial-like [Xenopus (Silurana) tropicalis]
c123100.graph_c0	0	0	116	14.3283	1.89e-15	6.31773	up	--	--	Molecular Function: calcium ion binding (GO:0005509);; Cellular Component: cell part (GO:0044464);;	--	[T]	Signal transduction mechanisms	EF hand;; EF-hand domain pair;; EF-hand domain;; EF hand;; EF-hand domain pair	Parvalbumin alpha OS=Lithobates catesbeiana (American bullfrog) PE=1 SV=1	parvalbumin alpha [Pelophylax esculentus]
c117878.graph_c0	0	0	113	3.79077	3.55e-15	6.28041	up	--	--	Molecular Function: actin binding (GO:0003779);; Molecular Function: tropomyosin binding (GO:0005523);; Cellular Component: cytoskeleton (GO:0005856);;	--	[Z]	Cytoskeleton	Tropomodulin	--	leiomodin 3 (fetal) [Xenopus (Silurana) tropicalis]
c115536.graph_c0	0	0	104	7.77672	2.53e-14	6.16228	up	--	--	Molecular Function: DNA binding (GO:0003677);; Molecular Function: sequence-specific DNA binding transcription factor activity (GO:0003700);; Cellular Component: nucleus (GO:0005634);; Biological Process: regulation of transcription, DNA-templated (GO:0006355);;	K10182|3.198e-25|xtr:100489988|tbx15; T-box 15; K10182 T-box protein 15 (A)	[K]	Transcription	--	--	PREDICTED: T-box transcription factor TBX15 [Xenopus (Silurana) tropicalis]
c51360.graph_c0	0	0	95	8.45098	2.02e-13	6.0336	up	--	--	Molecular Function: protein kinase C binding (GO:0005080);; Cellular Component: nucleus (GO:0005634);; Cellular Component: plasma membrane (GO:0005886);; Biological Process: negative regulation of protein kinase activity (GO:0006469);; Molecular Function: protein kinase C inhibitor activity (GO:0008426);; Biological Process: response to heat (GO:0009408);; Biological Process: response to virus (G…	K04455|9.4417e-112|xla:447107|hspb1, hsp27; heat shock 27kDa protein 1; K04455 heat shock protein beta-1 (A)	[O]	Posttranslational modification, protein turnover, chaperones	Hsp20/alpha crystallin family	Heat shock protein beta-1 GN=HSPB1 OS=Gallus gallus (Chicken) PE=2 SV=1	Heat shock protein beta-1 [Rana catesbeiana]
c68067.graph_c0	0	0	87	17.1339	1.41e-12	5.90871	up	--	--	Molecular Function: cytochrome-c oxidase activity (GO:0004129);; Cellular Component: mitochondrial respiratory chain complex IV (GO:0005751);; Biological Process: ion transport (GO:0006811);;	K02266|2.71728e-46|xtr:448222|cox6a2; cytochrome c oxidase subunit VIa polypeptide 2; K02266 cytochrome c oxidase subunit 6a (A)	[C]	Energy production and conversion	Cytochrome c oxidase subunit VIa	Cytochrome c oxidase subunit 6A, mitochondrial (Precursor) OS=Cyprinus carpio (Common carp) PE=3 SV=1	cytochrome c oxidase subunit VIa polypeptide 2 [Xenopus (Silurana) tropicalis]
c25256.graph_c0	0	0	82	8.07165	5.02e-12	5.82478	up	--	--	Molecular Function: transporter activity (GO:0005215);; Cellular Component: mitochondrial inner membrane (GO:0005743);; Biological Process: apoptotic mitochondrial changes (GO:0008637);; Cellular Component: integral component of membrane (GO:0016021);; Biological Process: transmembrane transport (GO:0055085);; Biological Process: negative regulation of necrotic cell death (GO:0060547);;	K05863|9.02756e-20|lve:103075399|SLC25A4; solute carrier family 25 (mitochondrial carrier; adenine nucleotide translocator), member 4; K05863 solute carrier family 25 (mitochondrial adenine nucleotide translocator), member 4/5/6/31 (A)	[C]	Energy production and conversion	--	--	ADP/ATP translocase 2 [Anas platyrhynchos]
c107611.graph_c0	2	0.0703237	221	7.32513	0	5.82141	up	--	--	Cellular Component: nucleus (GO:0005634);; Cellular Component: cytoplasm (GO:0005737);; Biological Process: epithelial cell differentiation (GO:0030855);; Cellular Component: keratin filament (GO:0045095);; Biological Process: intermediate filament bundle assembly (GO:0045110);;	K07604|2.81879e-142|xla:380402|krt-b, krt, krt1-2, xk70; keratin; K07604 type I keratin, acidic (A)	--	--	Intermediate filament protein	Keratin, type I cytoskeletal 47 kDa GN=xk70a OS=Xenopus laevis (African clawed frog) PE=2 SV=2	keratin [Xenopus laevis]
c114385.graph_c0	0	0	80	2.54102	8.44e-12	5.7898	up	--	--	Molecular Function: actin binding (GO:0003779);; Biological Process: cell adhesion (GO:0007155);; Cellular Component: myosin filament (GO:0032982);;	K12558|0|amj:102559353|MYBPC2; myosin binding protein C, fast type; K12558 myosin-binding protein C, fast-type (A)	--	--	Immunoglobulin I-set domain;; Fibronectin type III domain;; Immunoglobulin domain;; Immunoglobulin domain;; Immunoglobulin domain;; Immunoglobulin V-set domain;; CD80-like C2-set immunoglobulin domain	Myosin-binding protein C, fast-type GN=MYBPC2 OS=Gallus gallus (Chicken) PE=1 SV=3	PREDICTED: myosin-binding protein C, fast-type [Alligator mississippiensis]
c117222.graph_c0	0	0	77	4.42179	1.86e-11	5.73567	up	--	--	Cellular Component: cell-cell adherens junction (GO:0005913);; Biological Process: multicellular organismal development (GO:0007275);; Cellular Component: intercalated disc (GO:0014704);; Biological Process: actin cytoskeleton organization (GO:0030036);; Biological Process: striated muscle cell development (GO:0055002);; Biological Process: biological regulation (GO:0065007);;	--	--	--	--	Xin actin-binding repeat-containing protein 1 GN=xirp1 OS=Danio rerio (Zebrafish) PE=1 SV=1	PREDICTED: xin actin-binding repeat-containing protein 1-like isoform X2 [Xenopus (Silurana) tropicalis]
c109981.graph_c0	0	0	64	3.8668	7.07e-10	5.47437	up	--	--	--	K12567|0|bacu:103014327|titin-like; K12567 titin [EC:2.7.11.1] (A)	[Z]	Cytoskeleton	Fibronectin type III domain;; Immunoglobulin I-set domain;; Tissue factor;; Immunoglobulin V-set domain;; Immunoglobulin domain;; Immunoglobulin domain	Myosin-binding protein C, cardiac-type GN=MYBPC3 OS=Gallus gallus (Chicken) PE=1 SV=3	PREDICTED: titin-like [Latimeria chalumnae]
c118894.graph_c1	0	0	61	3.10766	1.72e-09	5.40671	up	--	--	Cellular Component: sodium:potassium-exchanging ATPase complex (GO:0005890);; Biological Process: potassium ion transport (GO:0006813);; Biological Process: sodium ion transport (GO:0006814);; Biological Process: proton transport (GO:0015992);;	K01540|1.2985e-44|xla:735041|atp1b4; ATPase, Na+/K+ transporting, beta 4 polypeptide; K01540 sodium/potassium-transporting ATPase subunit beta (A)	[P]	Inorganic ion transport and metabolism	Sodium / potassium ATPase beta chain	Protein ATP1B4 GN=atp1b4 OS=Xenopus laevis (African clawed frog) PE=1 SV=1	protein ATP1B4 [Xenopus laevis]
c117941.graph_c0	0	0	60	1.94016	2.33e-09	5.38343	up	--	--	--	K10473|0|xla:779378|klhl40, kbtbd5; kelch-like family member 40; K10473 kelch repeat and BTB domain-containing protein 5/10 (A)	[TR]	--	Kelch motif;; BTB/POZ domain;; Kelch motif;; BTB And C-terminal Kelch;; Galactose oxidase, central domain;; Galactose oxidase, central domain;; Kelch motif;; Kelch motif	Kelch-like protein 40 GN=klhl40 OS=Xenopus laevis (African clawed frog) PE=2 SV=1	kelch-like protein 40 [Xenopus laevis]
c108695.graph_c0	2	0.093928	159	7.03904	2.22e-16	5.35011	up	--	--	Molecular Function: calcium ion binding (GO:0005509);; Cellular Component: sarcoplasmic reticulum lumen (GO:0033018);;	--	--	--	Calsequestrin;; Thioredoxin-like domain	Calsequestrin-1 (Precursor) OS=Pelophylax esculentus (Edible frog) PE=1 SV=1	RecName: Full=Calsequestrin-1; AltName: Full=Calsequestrin, skeletal muscle isoform; Flags: Precursor [Pelophylax esculentus]
c96812.graph_c0	3	0.26262	202	16.669	0	5.29993	up	--	--	Cellular Component: membrane (GO:0016020);;	--	[R]	General function prediction only	Tetraspanin family	--	MGC81526 protein [Xenopus laevis]
c111484.graph_c0	0	0	53	5.53003	2.06e-08	5.20901	up	--	--	--	K18267|2.66583e-150|xtr:100491666|neb; nebulin; K18267 nebulin (A)	[Z]	Cytoskeleton	Nebulin repeat	--	PREDICTED: nebulin-like, partial [Pelecanus crispus]
c113111.graph_c0	0	0	53	3.16654	2.06e-08	5.20901	up	--	--	Biological Process: multicellular organismal development (GO:0007275);; Molecular Function: transferase activity, transferring phosphorus-containing groups (GO:0016772);; Biological Process: anatomical structure development (GO:0048856);;	K08809|2.38682e-157|xtr:100486621|speg; SPEG complex locus; K08809 striated muscle-specific serine/threonine protein kinase [EC:2.7.11.1] (A)	--	--	Immunoglobulin I-set domain	Striated muscle preferentially expressed protein kinase GN=speg OS=Danio rerio (Zebrafish) PE=2 SV=1	PREDICTED: striated muscle preferentially expressed protein kinase [Xenopus (Silurana) tropicalis]
c122764.graph_c0	33	1.66579	1554	73.9451	0	5.2078	up	[J]	Translation, ribosomal structure and biogenesis	Molecular Function: translation elongation factor activity (GO:0003746);; Molecular Function: GTPase activity (GO:0003924);; Molecular Function: GTP binding (GO:0005525);; Cellular Component: eukaryotic translation elongation factor 1 complex (GO:0005853);; Biological Process: GTP catabolic process (GO:0006184);; Biological Process: translational elongation (GO:0006414);; Biological Process: nega…	K03231|0|pale:102895186|EEF1A2; eukaryotic translation elongation factor 1 alpha 2; K03231 elongation factor 1-alpha (A)	[J]	Translation, ribosomal structure and biogenesis	Elongation factor Tu C-terminal domain;; Elongation factor Tu GTP binding domain;; Elongation factor Tu domain 2	Elongation factor 1-alpha 1 GN=EEF1A OS=Gallus gallus (Chicken) PE=2 SV=1	PREDICTED: elongation factor 1-alpha 2 [Chaetura pelagica]
c112752.graph_c2	0	0	51	2.18106	3.92e-08	5.15505	up	--	--	--	--	--	--	Immunoglobulin I-set domain;; Immunoglobulin domain;; Immunoglobulin domain;; Immunoglobulin V-set domain;; Immunoglobulin domain;; CD80-like C2-set immunoglobulin domain	Myosin light chain kinase, smooth muscle, deglutamylated form GN=Mylk OS=Gallus gallus (Chicken) PE=1 SV=2	PREDICTED: myopalladin isoform X4 [Xenopus (Silurana) tropicalis]
c103106.graph_c0	0	0	50	2.32128	5.44e-08	5.12729	up	--	--	--	--	--	--	Immunoglobulin I-set domain;; Immunoglobulin V-set domain;; Immunoglobulin domain;; Immunoglobulin domain	Myosin-binding protein C, fast-type GN=MYBPC2 OS=Gallus gallus (Chicken) PE=1 SV=3	PREDICTED: myosin-binding protein C, fast-type [Xenopus (Silurana) tropicalis]
c103893.graph_c0	0	0	50	3.02713	5.44e-08	5.12729	up	--	--	--	--	--	--	Forty-two-three protein	UAP56-interacting factor GN=FYTTD1 OS=Gallus gallus (Chicken) PE=2 SV=1	PREDICTED: UAP56-interacting factor-like isoform X2 [Xenopus (Silurana) tropicalis]
c123016.graph_c0	4	0.27951	217	14.2938	0	5.09419	up	--	--	Biological Process: skeletal muscle contraction (GO:0003009);; Molecular Function: actin binding (GO:0003779);; Cellular Component: nucleus (GO:0005634);; Cellular Component: troponin complex (GO:0005861);; Molecular Function: troponin T binding (GO:0031014);; Biological Process: positive regulation of transcription, DNA-templated (GO:0045893);; Molecular Function: metal ion binding (GO:0046872);;	K12043|4.45139e-93|xtr:496523|tnni2, amcd2b, da2b, fssv, fstni; troponin I type 2 (skeletal, fast); K12043 troponin I, fast skeletal muscle (A)	[Z]	Cytoskeleton	Troponin	Troponin I, fast skeletal muscle GN=TNNI2 OS=Coturnix coturnix japonica (Japanese quail) PE=3 SV=2	fast troponin I [Rana catesbeiana]
c107729.graph_c0	2	0.0775546	131	4.78851	1.83e-14	5.07347	up	--	--	Biological Process: response to stress (GO:0006950);; Cellular Component: intracellular part (GO:0044424);;	K08879|4.01198e-115|xla:379472|hspb8; heat shock 22kDa protein 8; K08879 heat shock protein beta-8 (A)	[O]	Posttranslational modification, protein turnover, chaperones	Hsp20/alpha crystallin family	Heat shock protein beta-1 GN=HSPB1 OS=Gallus gallus (Chicken) PE=2 SV=1	heat shock 22kDa protein 8 [Xenopus laevis]
c105979.graph_c0	0	0	48	9.98529	1.06e-07	5.07011	up	--	--	--	K15528|6.98354e-16|cmy:102932256|fatty-acid amide hydrolase 1-like; K15528 fatty acid amide hydrolase [EC:3.5.1.99] (A)	--	--	--	Vitamin D3 hydroxylase-associated protein OS=Gallus gallus (Chicken) PE=1 SV=3	PREDICTED: vitamin D3 hydroxylase-associated protein-like [Chrysemys picta bellii]
c102359.graph_c0	1	0.0246514	89	2.06816	1.35e-11	5.06461	up	--	--	--	--	--	--	Calcineurin-binding protein (Calsarcin)	--	PREDICTED: synaptopodin 2-like protein [Xenopus (Silurana) tropicalis]
c27388.graph_c0	20	1.22554	841	48.5787	0	5.01317	up	--	--	--	--	--	--	Lectin C-type domain	Lectin (Precursor) GN=LEC OS=Pleurodeles waltl (Iberian ribbed newt) PE=1 SV=1	PREDICTED: snaclec coagulation factor IX-binding protein subunit A-like [Anolis carolinensis]
c114214.graph_c0	0	0	45	2.08915	2.92e-07	4.97986	up	--	--	--	K10473|0|xtr:394822|klhl41, kbtbd10, sarcosin; kelch-like family member 41; K10473 kelch repeat and BTB domain-containing protein 5/10 (A)	[TR]	--	BTB/POZ domain;; BTB And C-terminal Kelch;; Kelch motif;; Galactose oxidase, central domain	Kelch-like protein 41b OS=Danio rerio (Zebrafish) PE=2 SV=1	kelch-like family member 41 [Xenopus (Silurana) tropicalis]
c117612.graph_c0	0	0	41	4.02912	1.18e-06	4.85002	up	[RTKL]	--	--	K08809|2.90126e-134|xtr:100486621|speg; SPEG complex locus; K08809 striated muscle-specific serine/threonine protein kinase [EC:2.7.11.1] (A)	[T]	Signal transduction mechanisms	Protein kinase domain;; Protein tyrosine kinase;; Kinase-like	Striated muscle preferentially expressed protein kinase GN=speg OS=Danio rerio (Zebrafish) PE=2 SV=1	PREDICTED: striated muscle preferentially expressed protein kinase-like, partial [Chlamydotis macqueenii]
c102663.graph_c0	0	0	41	1.71495	1.18e-06	4.85002	up	--	--	--	K17531|0|cmy:102939557|OBSCN; obscurin, cytoskeletal calmodulin and titin-interacting RhoGEF; K17531 Obscurin-RhoGEF [EC:2.7.11.1] (A)	--	--	Immunoglobulin I-set domain;; Immunoglobulin domain;; Immunoglobulin domain;; Immunoglobulin V-set domain;; Immunoglobulin domain;; Immunoglobulin C1-set domain;; CD80-like C2-set immunoglobulin domain	Myosin-binding protein C, fast-type GN=MYBPC2 OS=Gallus gallus (Chicken) PE=1 SV=3	PREDICTED: obscurin isoform X29 [Chrysemys picta bellii]
c106568.graph_c0	0	0	40	1.64405	1.69e-06	4.81564	up	--	--	Molecular Function: inward rectifier potassium channel activity (GO:0005242);; Biological Process: potassium ion transport (GO:0006813);; Cellular Component: integral component of membrane (GO:0016021);; Biological Process: regulation of ion transmembrane transport (GO:0034765);;	K05008|2.17499e-175|xla:379692|kcnj15, kcnj1; potassium inwardly-rectifying channel, subfamily J, member 15; K05008 potassium inwardly-rectifying channel subfamily J member 15 (A)	[P]	Inorganic ion transport and metabolism	Inward rectifier potassium channel	Inward rectifier potassium channel 2 GN=KCNJ2 OS=Gallus gallus (Chicken) PE=2 SV=1	potassium channel, inwardly rectifying subfamily J, member 15 [Xenopus laevis]
c107266.graph_c0	0	0	38	1.90474	3.49e-06	4.74434	up	--	--	Molecular Function: acetylcholine-activated cation-selective channel activity (GO:0004889);; Cellular Component: acetylcholine-gated channel complex (GO:0005892);; Biological Process: ion transport (GO:0006811);; Biological Process: synaptic transmission, cholinergic (GO:0007271);; Molecular Function: acetylcholine receptor activity (GO:0015464);; Cellular Component: cell junction (GO:0030054);; …	K04812|4.80234e-171|pss:102461595|acetylcholine receptor subunit beta-like; K04812 nicotinic acetylcholine receptor beta-1 (A)	[T]	Signal transduction mechanisms	Neurotransmitter-gated ion-channel transmembrane region;; Neurotransmitter-gated ion-channel ligand binding domain	Acetylcholine receptor subunit beta (Precursor; Fragment) GN=chrnb1 OS=Xenopus laevis (African clawed frog) PE=2 SV=1	RecName: Full=Acetylcholine receptor subunit beta; Flags: Precursor, partial [Xenopus laevis]
c79470.graph_c0	9	0.456585	334	15.9727	0	4.74048	up	[P]	Inorganic ion transport and metabolism	Molecular Function: transporter activity (GO:0005215);; Biological Process: sodium ion transport (GO:0006814);; Cellular Component: membrane (GO:0016020);; Biological Process: transmembrane transport (GO:0055085);;	K14445|0|xtr:493460|slc13a2, nact, nadc-1, nadc1, sdct1; solute carrier family 13 (sodium-dependent dicarboxylate transporter), member 2; K14445 solute carrier family 13 (sodium-dependent dicarboxylate transporter), member 2/3/5 (A)	[P]	Inorganic ion transport and metabolism	Sodium:sulfate symporter transmembrane region;; Citrate transporter	--	solute carrier family 13, member 2 [Xenopus (Silurana) tropicalis]
c100316.graph_c0	4	0.419789	169	16.719	1.44e-15	4.73628	up	--	--	Cellular Component: nucleus (GO:0005634);;	--	--	--	--	Musculoskeletal embryonic nuclear protein 1 GN=mustn1 OS=Xenopus laevis (African clawed frog) PE=3 SV=1	musculoskeletal embryonic nuclear protein 1 [Xenopus laevis]
c106029.graph_c0	121	5.87621	3982	182.291	0	4.72719	up	--	--	Molecular Function: creatine kinase activity (GO:0004111);; Molecular Function: ATP binding (GO:0005524);; Cellular Component: cytoplasm (GO:0005737);; Biological Process: phosphorylation (GO:0016310);;	K00933|0|xla:379765|ckm, ckmm, m-ck; creatine kinase, muscle (EC:2.7.3.2); K00933 creatine kinase [EC:2.7.3.2] (A)	[C]	Energy production and conversion	ATP:guanido phosphotransferase, C-terminal catalytic domain;; ATP:guanido phosphotransferase, N-terminal domain	Creatine kinase M-type GN=CKM OS=Gallus gallus (Chicken) PE=2 SV=1	PREDICTED: creatine kinase M-type [Chrysemys picta bellii]
c68207.graph_c0	0	0	37	1.84679	5.04e-06	4.70731	up	--	--	--	K17531|0|xtr:101730564|obscurin-like; K17531 Obscurin-RhoGEF [EC:2.7.11.1] (A)	--	--	Immunoglobulin I-set domain;; Immunoglobulin domain;; Immunoglobulin domain;; Immunoglobulin V-set domain;; Immunoglobulin domain	Myosin-binding protein C, fast-type GN=MYBPC2 OS=Gallus gallus (Chicken) PE=1 SV=3	PREDICTED: obscurin-like [Xenopus (Silurana) tropicalis]
c71169.graph_c0	4	0.429122	163	16.4839	3.89e-15	4.68459	up	--	--	--	--	--	--	--	--	PREDICTED: uncharacterized protein LOC100331538 [Danio rerio]
c119368.graph_c0	5	0.115118	192	4.16704	2.22e-16	4.66496	up	--	--	--	--	[L]	Replication, recombination and repair	hAT family C-terminal dimerisation region	--	PREDICTED: zinc finger BED domain-containing protein 1-like isoform X1 [Stegastes partitus]
c86222.graph_c0	7	0.192788	254	6.59427	0	4.66245	up	--	--	Molecular Function: transporter activity (GO:0005215);; Cellular Component: membrane (GO:0016020);; Biological Process: transmembrane transport (GO:0055085);;	K14611|0|xtr:100490216|solute carrier family 23 member 2-like; K14611 solute carrier family 23 (nucleobase transporter), member 1/2 (A)	[F]	Nucleotide transport and metabolism	Permease family	Solute carrier family 23 member 2 {ECO:0000250|UniProtKB:Q9UGH3} GN=slc23a2 OS=Xenopus tropicalis (Western clawed frog) PE=2 SV=1	PREDICTED: solute carrier family 23 member 2-like [Xenopus (Silurana) tropicalis]
c111816.graph_c0	0	0	33	2.29381	2.28e-05	4.54893	up	[R]	General function prediction only	Biological Process: negative regulation of phosphatase activity (GO:0010923);; Molecular Function: phosphatase binding (GO:0019902);;	K17566|1.63082e-80|xtr:100487509|ppp1r27; protein phosphatase 1, regulatory subunit 27; K17566 protein phosphatase 1 regulatory subunit 27 (A)	[OT]	--	Ankyrin repeats (3 copies);; Ankyrin repeat;; Ankyrin repeats (many copies);; Ankyrin repeats (many copies);; Ankyrin repeat	Protein phosphatase 1 regulatory subunit 12A GN=PPP1R12A OS=Gallus gallus (Chicken) PE=1 SV=1	PREDICTED: protein phosphatase 1 regulatory subunit 27 [Xenopus (Silurana) tropicalis]
c111508.graph_c0	0	0	33	2.67783	2.28e-05	4.54893	up	--	--	--	K10467|2.00057e-131|xtr:100495906|klhl31; kelch-like family member 31; K10467 kelch-like protein 31 (A)	[TR]	--	BTB/POZ domain;; BTB And C-terminal Kelch	Kelch-like protein 31 GN=klhl31 OS=Danio rerio (Zebrafish) PE=2 SV=1	PREDICTED: kelch-like protein 31 isoform X1 [Xenopus (Silurana) tropicalis]
c113860.graph_c0	51	0.801681	1502	22.2563	0	4.54864	up	--	--	Molecular Function: structural molecule activity (GO:0005198);; Cellular Component: plasma membrane (GO:0005886);; Cellular Component: tight junction (GO:0005923);; Cellular Component: integral component of membrane (GO:0016021);; Biological Process: tube formation (GO:0035148);; Biological Process: digestive tract morphogenesis (GO:0048546);;	K06087|4.25543e-119|xtr:100124975|cldn15.1; claudin 15, gene 1; K06087 claudin (A)	--	--	PMP-22/EMP/MP20/Claudin family;; PMP-22/EMP/MP20/Claudin tight junction	Claudin-7-A {ECO:0000312|ZFIN:ZDB-GENE-040718-29} OS=Danio rerio (Zebrafish) PE=2 SV=1	claudin 15, gene 1 [Xenopus (Silurana) tropicalis]
c117554.graph_c0	43	1.30923	1247	35.7903	0	4.52053	up	--	--	Cellular Component: integral component of membrane (GO:0016021);; Biological Process: transmembrane transport (GO:0055085);;	K15123|4.12655e-156|xtr:100496270|slc25a47; solute carrier family 25, member 47; K15123 solute carrier family 25, member 45/47 (A)	[C]	Energy production and conversion	Mitochondrial carrier protein	Solute carrier family 25 member 47-A GN=slc25a47a OS=Danio rerio (Zebrafish) PE=2 SV=1	PREDICTED: solute carrier family 25 member 47 isoform X1 [Xenopus (Silurana) tropicalis]
c93891.graph_c0	0	0	32	2.70233	3.36e-05	4.50646	up	--	--	--	K17531|3.37653e-108|xtr:101730564|obscurin-like; K17531 Obscurin-RhoGEF [EC:2.7.11.1] (A)	--	--	Immunoglobulin I-set domain;; Immunoglobulin domain;; Immunoglobulin domain;; Immunoglobulin V-set domain;; Immunoglobulin domain;; CD80-like C2-set immunoglobulin domain	Myosin-binding protein C, cardiac-type GN=MYBPC3 OS=Gallus gallus (Chicken) PE=1 SV=3	PREDICTED: obscurin-like [Xenopus (Silurana) tropicalis]
c99486.graph_c0	0	0	32	0.887673	3.36e-05	4.50646	up	[RTKL]	--	--	K17530|0|xtr:100493379|dclk3; doublecortin-like kinase 3; K17530 doublecortin-like kinase 3 [EC:2.7.11.1] (A)	[T]	Signal transduction mechanisms	Protein kinase domain;; Protein tyrosine kinase;; Doublecortin	Calcium/calmodulin-dependent protein kinase type II delta 1 chain {ECO:0000303|PubMed:17103413} OS=Danio rerio (Zebrafish) PE=2 SV=2	PREDICTED: serine/threonine-protein kinase DCLK3 [Xenopus (Silurana) tropicalis]
c108705.graph_c0	1	0.0623119	57	3.34809	7.2e-08	4.43489	up	--	--	Molecular Function: ryanodine-sensitive calcium-release channel activity (GO:0005219);; Molecular Function: calcium ion binding (GO:0005509);; Biological Process: cellular calcium ion homeostasis (GO:0006874);; Cellular Component: integral component of membrane (GO:0016021);; Biological Process: calcium ion transmembrane transport (GO:0070588);;	K04961|6.88286e-179|phi:102102409|ryanodine receptor 1-like; K04961 ryanodine receptor 1 (A)	[T]	Signal transduction mechanisms	Ion transport protein	--	PREDICTED: ryanodine receptor 1-like [Pseudopodoces humilis]
c95289.graph_c0	0	0	30	1.63243	7.36e-05	4.41758	up	--	--	Cellular Component: voltage-gated sodium channel complex (GO:0001518);; Molecular Function: voltage-gated sodium channel activity (GO:0005248);; Biological Process: sodium ion transport (GO:0006814);;	K04845|5.2504e-93|xtr:101734970|scn1b; sodium channel, voltage-gated, type I, beta subunit; K04845 voltage-gated sodium channel type I beta (A)	--	--	Immunoglobulin domain;; Immunoglobulin V-set domain	--	PREDICTED: sodium channel subunit beta-1 [Xenopus (Silurana) tropicalis]
c101409.graph_c0	25	2.91643	663	72.9082	0	4.3652	up	--	--	--	--	--	--	Small cytokines (intecrine/chemokine), interleukin-8 like	--	PREDICTED: c-X-C motif chemokine 10-like [Xenopus (Silurana) tropicalis]
c123075.graph_c0	0	0	28	8.96014	0.000164133	4.32286	up	--	--	Biological Process: protein metabolic process (GO:0019538);;	K01335|2.90462e-27|xtr:100491419|complement factor B-like; K01335 component factor B [EC:3.4.21.47] (A)	[E]	Amino acid transport and metabolism	Sushi domain (SCR repeat)	Complement factor B-like protease Bb fragment (Fragment) OS=Gallus gallus (Chicken) PE=1 SV=1	PREDICTED: complement factor B-like isoform X2 [Xenopus (Silurana) tropicalis]
c95679.graph_c0	0	0	28	1.58183	0.000164133	4.32286	up	[R]	General function prediction only	Biological Process: protein ubiquitination (GO:0016567);; Biological Process: intracellular signal transduction (GO:0035556);;	K10324|0|xtr:100490014|asb2; ankyrin repeat and SOCS box containing 2; K10324 ankyrin repeat and SOCS box protein 2 (A)	[R]	General function prediction only	Ankyrin repeat;; Ankyrin repeats (3 copies);; Ankyrin repeat;; Ankyrin repeats (many copies);; Ankyrin repeats (many copies)	Serine/threonine-protein phosphatase 6 regulatory ankyrin repeat subunit B GN=ANKRD44 OS=Gallus gallus (Chicken) PE=2 SV=1	PREDICTED: ankyrin repeat and SOCS box protein 2 isoform X2 [Xenopus (Silurana) tropicalis]
c69937.graph_c0	0	0	28	1.55655	0.000164133	4.32286	up	[Z]	Cytoskeleton	Molecular Function: motor activity (GO:0003774);; Molecular Function: ATP binding (GO:0005524);; Cellular Component: myosin complex (GO:0016459);;	K10362|0|xtr:100496668|myo18b; myosin XVIIIB; K10362 myosin XVIII (A)	[Z]	Cytoskeleton	Myosin head (motor domain);; Cortexillin I, coiled coil;; IQ calmodulin-binding motif	Myosin-11 GN=MYH11 OS=Gallus gallus (Chicken) PE=1 SV=4	PREDICTED: unconventional myosin-XVIIIb isoform X3 [Xenopus (Silurana) tropicalis]
c74671.graph_c0	0	0	28	1.53348	0.000164133	4.32286	up	[G]	Carbohydrate transport and metabolism	Biological Process: carbohydrate metabolic process (GO:0005975);; Molecular Function: glycogen phosphorylase activity (GO:0008184);; Molecular Function: pyridoxal phosphate binding (GO:0030170);;	K00688|0|xtr:100491051|glycogen phosphorylase, muscle form-like; K00688 starch phosphorylase [EC:2.4.1.1] (A)	[G]	Carbohydrate transport and metabolism	Carbohydrate phosphorylase	--	LOC100037229 protein [Xenopus laevis]
c108284.graph_c0	6	0.239321	170	6.3919	3.47e-14	4.27497	up	[G]	Carbohydrate transport and metabolism	Cellular Component: phosphopyruvate hydratase complex (GO:0000015);; Molecular Function: magnesium ion binding (GO:0000287);; Molecular Function: phosphopyruvate hydratase activity (GO:0004634);; Biological Process: glycolytic process (GO:0006096);;	K01689|0|xla:380038|eno3; enolase 3, beta muscle (EC:4.2.1.11); K01689 enolase [EC:4.2.1.11] (A)	[G]	Carbohydrate transport and metabolism	Enolase, C-terminal TIM barrel domain;; Enolase, N-terminal domain;; Methylaspartate ammonia-lyase C-terminus;; Enolase C-terminal domain-like	Alpha-enolase GN=ENO1 OS=Gallus gallus (Chicken) PE=2 SV=2	enolase 3 [Xenopus laevis]
c101231.graph_c0	0	0	27	4.03439	0.000246648	4.27306	up	--	--	Molecular Function: calcium ion binding (GO:0005509);;	K12750|1.58425e-46|xtr:100124786|myl4, MLC1av; myosin, light chain 4, alkali; atrial, embryonic; K12750 myosin light chain 4 (A)	[Z]	Cytoskeleton	--	Myosin light chain 1, cardiac muscle OS=Gallus gallus (Chicken) PE=1 SV=3	myosin, light chain 4, alkali; atrial, embryonic [Xenopus (Silurana) tropicalis]
c106974.graph_c0	34	0.824757	836	19.1163	0	4.27298	up	--	--	Cellular Component: extracellular region (GO:0005576);;	K04661|1.55088e-178|xtr:493419|fst, FS, foll, xfs; follistatin; K04661 follistatin (A)	[R]	General function prediction only	Kazal-type serine protease inhibitor domain;; Kazal-type serine protease inhibitor domain;; Follistatin/Osteonectin-like EGF domain	Follistatin (Precursor) GN=fst OS=Xenopus laevis (African clawed frog) PE=1 SV=2	follistatin [Xenopus laevis]
c109616.graph_c0	1	0.0477869	50	2.25232	6.21e-07	4.25093	up	--	--	--	--	--	--	--	--	PREDICTED: uncharacterized protein LOC101732519 [Xenopus (Silurana) tropicalis]
c116195.graph_c0	3	0.1138	96	3.43275	1.7e-10	4.23816	up	--	--	Biological Process: negative regulation of transcription from RNA polymerase II promoter (GO:0000122);; Molecular Function: transcription regulatory region sequence-specific DNA binding (GO:0000976);; Molecular Function: RNA polymerase II transcription corepressor activity (GO:0001106);; Molecular Function: sequence-specific DNA binding transcription factor activity (GO:0003700);; Molecular Funct…	K10182|0|xtr:100489988|tbx15; T-box 15; K10182 T-box protein 15 (A)	[K]	Transcription	T-box	T-box transcription factor TBX20 GN=TBX20 OS=Gallus gallus (Chicken) PE=2 SV=1	PREDICTED: T-box transcription factor TBX15 [Xenopus (Silurana) tropicalis]
c106043.graph_c0	11	0.689058	281	16.5928	0	4.23401	up	--	--	--	--	--	--	C1q domain;; Collagen triple helix repeat (20 copies)	Otolin-1-A (Precursor) GN=otol1a OS=Danio rerio (Zebrafish) PE=2 SV=1	PREDICTED: complement C1q and tumor necrosis factor-related protein 9-like [Xenopus (Silurana) tropicalis]
c106993.graph_c0	2	0.0622108	71	2.08183	1.1e-08	4.20329	up	--	--	Molecular Function: ryanodine-sensitive calcium-release channel activity (GO:0005219);; Molecular Function: calcium ion binding (GO:0005509);; Biological Process: cellular calcium ion homeostasis (GO:0006874);; Cellular Component: integral component of membrane (GO:0016021);; Biological Process: calcium ion transmembrane transport (GO:0070588);;	K04961|0|xtr:100495378|ryr1; ryanodine receptor 1 (skeletal); K04961 ryanodine receptor 1 (A)	[T]	Signal transduction mechanisms	Ryanodine Receptor TM 4-6;; EF-hand domain pair	--	ryanodine receptor alpha isoform [Rana catesbeiana]
c107679.graph_c0	0	0	25	0.999738	0.000564361	4.16798	up	--	--	Molecular Function: ryanodine-sensitive calcium-release channel activity (GO:0005219);; Molecular Function: calcium ion binding (GO:0005509);; Biological Process: cellular calcium ion homeostasis (GO:0006874);; Cellular Component: integral component of membrane (GO:0016021);; Biological Process: calcium ion transmembrane transport (GO:0070588);;	K04961|0|xtr:100495378|ryr1; ryanodine receptor 1 (skeletal); K04961 ryanodine receptor 1 (A)	[T]	Signal transduction mechanisms	--	--	ryanodine receptor alpha isoform [Rana catesbeiana]
c80250.graph_c0	0	0	25	2.33641	0.000564361	4.16798	up	--	--	Molecular Function: ryanodine-sensitive calcium-release channel activity (GO:0005219);; Molecular Function: calcium ion binding (GO:0005509);; Biological Process: cellular calcium ion homeostasis (GO:0006874);; Cellular Component: integral component of membrane (GO:0016021);; Biological Process: calcium ion transmembrane transport (GO:0070588);;	K04961|3.7319e-143|xtr:100495378|ryr1; ryanodine receptor 1 (skeletal); K04961 ryanodine receptor 1 (A)	[T]	Signal transduction mechanisms	RyR and IP3R Homology associated	--	ryanodine receptor alpha isoform [Rana catesbeiana]
c109805.graph_c0	0	0	25	2.99417	0.000564361	4.16798	up	--	--	--	--	--	--	--	--	PREDICTED: perforin-1-like [Xenopus (Silurana) tropicalis]
c94880.graph_c0	0	0	25	1.80786	0.000564361	4.16798	up	--	--	--	K18267|1.39089e-166|xtr:100491666|neb; nebulin; K18267 nebulin (A)	[Z]	Cytoskeleton	Nebulin repeat	--	PREDICTED: nebulin isoform X17 [Xenopus (Silurana) tropicalis]
c107893.graph_c0	0	0	25	1.87671	0.000564361	4.16798	up	--	--	Molecular Function: sequence-specific DNA binding transcription factor activity (GO:0003700);; Cellular Component: nucleus (GO:0005634);; Biological Process: regulation of transcription, DNA-templated (GO:0006355);; Molecular Function: protein heterodimerization activity (GO:0046982);;	K09254|1.02273e-20|dre:415101|rel, c-rel, zgc:100833; v-rel avian reticuloendotheliosis viral oncogene homolog; K09254 c-Rel proto-oncogene protein (A)	--	--	Rel homology domain (RHD)	Proto-oncogene c-Rel GN=REL OS=Gallus gallus (Chicken) PE=1 SV=2	proto-oncogene c-Rel [Danio rerio]
c55571.graph_c0	0	0	25	3.01248	0.000564361	4.16798	up	--	--	--	--	[O]	Posttranslational modification, protein turnover, chaperones	CS domain	Prostaglandin E synthase 3 (Fragment) GN=PTGES3 OS=Gallus gallus (Chicken) PE=1 SV=1	Prostaglandin E synthase 3 [Rana catesbeiana]
c101480.graph_c0	0	0	25	2.2206	0.000564361	4.16798	up	--	--	--	--	--	--	--	--	PREDICTED: P2X purinoceptor 7-like [Xenopus (Silurana) tropicalis]
c25701.graph_c0	2	0.170528	69	5.54582	1.87e-08	4.16291	up	[TZDR]	--	Molecular Function: calcium ion binding (GO:0005509);;	K05738|1.79429e-69|xtr:394551|myl1, MLC1f/3f, XMLC1f, XMLC3f, mlc1f, mlc3f; myosin, light chain 1, alkali; skeletal, fast; K05738 myosin light chain 1 (A)	[Z]	Cytoskeleton	EF-hand domain pair;; EF hand	Myosin light chain 3, skeletal muscle isoform OS=Gallus gallus (Chicken) PE=1 SV=3	myosin, light polypeptide 1, alkali; skeletal, fast [Xenopus (Silurana) tropicalis]
c105714.graph_c0	1	0.0404006	45	1.71377	3.12e-06	4.10351	up	--	--	Biological Process: positive regulation of receptor recycling (GO:0001921);; Molecular Function: structural molecule activity (GO:0005198);; Cellular Component: tight junction (GO:0005923);; Biological Process: regulation of cell shape (GO:0008360);; Cellular Component: integral component of membrane (GO:0016021);; Biological Process: vesicle-mediated transport (GO:0016192);; Cellular Component: …	--	--	--	Popeye protein conserved region	Blood vessel epicardial substance GN=bves OS=Xenopus tropicalis (Western clawed frog) PE=2 SV=1	PREDICTED: blood vessel epicardial substance isoform X2 [Corvus cornix cornix]
c85999.graph_c0	0	0	23	1.80926	0.00131475	4.05465	up	--	--	Biological Process: response to hypoxia (GO:0001666);; Biological Process: lens development in camera-type eye (GO:0002088);; Molecular Function: structural constituent of eye lens (GO:0005212);; Cellular Component: nucleus (GO:0005634);; Cellular Component: mitochondrion (GO:0005739);; Cellular Component: cytosol (GO:0005829);; Cellular Component: plasma membrane (GO:0005886);; Biological Proces…	K09542|3.02422e-97|xtr:100494321|cryab; crystallin, alpha B; K09542 crystallin, alpha B (A)	[O]	Posttranslational modification, protein turnover, chaperones	Alpha crystallin A chain, N terminal;; Hsp20/alpha crystallin family	Alpha-crystallin B chain GN=CRYAB OS=Lithobates catesbeiana (American bullfrog) PE=2 SV=1	RecName: Full=Alpha-crystallin B chain; AltName: Full=Alpha(B)-crystallin [Rana catesbeiana]
c109447.graph_c0	1	0.104772	43	4.24683	6.06e-06	4.04004	up	--	--	--	--	--	--	--	--	PREDICTED: uncharacterized protein LOC100493463 [Xenopus (Silurana) tropicalis]
c88789.graph_c0	0	0	22	1.45076	0.00202048	3.99446	up	[O]	Posttranslational modification, protein turnover, chaperones	Molecular Function: ATP binding (GO:0005524);; Biological Process: protein folding (GO:0006457);; Biological Process: response to stress (GO:0006950);; Molecular Function: unfolded protein binding (GO:0051082);;	K04079|0|xtr:780222|hsp90aa1.2, hsp86, hsp89, hsp90, hsp90a, hsp90alpha.2, hsp90n, hspc1, hspca, hspcal1, hspcal4, hspn, lap2; heat shock protein 90kDa alpha (cytosolic), class A member 1, gene 2; K04079 molecular chaperone HtpG (A)	[O]	Posttranslational modification, protein turnover, chaperones	Hsp90 protein	Heat shock protein HSP 90-alpha GN=HSP90AA1 OS=Gallus gallus (Chicken) PE=3 SV=3	heat shock protein 90kDa alpha (cytosolic), class A member 1, gene 2 [Xenopus (Silurana) tropicalis]
c107444.graph_c0	2	0.201284	61	5.7871	1.67e-07	3.98908	up	--	--	--	K01047|7.06591e-21|cmy:102943282|PLA2G3; phospholipase A2, group III; K01047 secretory phospholipase A2 [EC:3.1.1.4] (A)	--	--	--	Phospholipase A2 isozymes PA3A/PA3B/PA5 OS=Heloderma suspectum (Gila monster) PE=1 SV=3	Group 3 secretory phospholipase A2, partial [Mesitornis unicolor]
c107920.graph_c0	1	0.068654	41	2.65339	1.19e-05	3.97366	up	--	--	--	K12567|0|apla:101789520|TTN; titin; K12567 titin [EC:2.7.11.1] (A)	[Z]	Cytoskeleton	Fibronectin type III domain;; Immunoglobulin I-set domain;; Immunoglobulin domain	Myosin-binding protein C, cardiac-type GN=MYBPC3 OS=Gallus gallus (Chicken) PE=1 SV=3	PREDICTED: titin [Anas platyrhynchos]
c105001.graph_c0	2	0.142984	60	4.04352	2.22e-07	3.9658	up	--	--	Molecular Function: motor activity (GO:0003774);; Molecular Function: ATP binding (GO:0005524);; Cellular Component: myosin complex (GO:0016459);;	K10362|6.65002e-170|xtr:100496668|myo18b; myosin XVIIIB; K10362 myosin XVIII (A)	[Z]	Cytoskeleton	Oestrogen receptor	--	PREDICTED: unconventional myosin-XVIIIb isoform X3 [Xenopus (Silurana) tropicalis]
c107121.graph_c0	0	0	21	2.15862	0.00311915	3.93165	up	--	--	--	--	--	--	--	--	PREDICTED: uncharacterized protein LOC101733359 [Xenopus (Silurana) tropicalis]
c70390.graph_c0	0	0	21	1.19436	0.00311915	3.93165	up	--	--	--	--	--	--	Phosphoinositide-interacting protein family	--	PREDICTED: transmembrane protein 100 isoform X1 [Pelodiscus sinensis]
c121919.graph_c3	52	0.985625	982	17.5457	0	3.90892	up	--	--	--	--	--	--	Mucin-2 protein WxxW repeating region;; Right handed beta helix region	Transmembrane protein 2 GN=tmem2 OS=Danio rerio (Zebrafish) PE=2 SV=1	PREDICTED: protein KIAA1199 homolog [Xenopus (Silurana) tropicalis]
c116617.graph_c2	1	0.0550404	39	2.02347	2.36e-05	3.90407	up	--	--	--	--	--	--	--	RNA-binding protein 24 GN=rbm24 OS=Xenopus tropicalis (Western clawed frog) PE=2 SV=1	PREDICTED: RNA-binding protein 24 [Chaetura pelagica]
c112677.graph_c1	3	0.200691	74	4.66648	3.04e-08	3.86912	up	--	--	Biological Process: response to stress (GO:0006950);; Cellular Component: intracellular membrane-bounded organelle (GO:0043231);;	K09546|1.90437e-77|xla:446393|hspb7; heat shock 27kDa protein family, member 7 (cardiovascular); K09546 heat shock protein beta-7 (A)	[O]	Posttranslational modification, protein turnover, chaperones	Hsp20/alpha crystallin family	Alpha-crystallin A chain GN=CRYAA OS=Gallus gallus (Chicken) PE=1 SV=2	cardiovascular heat shock protein [Xenopus laevis]
c124348.graph_c0	0	0	20	1.54249	0.00483655	3.86598	up	[R]	General function prediction only	Cellular Component: nucleus (GO:0005634);; Biological Process: cellular response to DNA damage stimulus (GO:0006974);; Molecular Function: hydrolase activity, acting on glycosyl bonds (GO:0016798);; Biological Process: protein de-ADP-ribosylation (GO:0051725);;	--	[BK]	--	Macro domain	O-acetyl-ADP-ribose deacetylase MACROD2 GN=macrod2 OS=Xenopus laevis (African clawed frog) PE=2 SV=1	MACRO domain containing 1 [Xenopus laevis]
c121919.graph_c0	2	0.0915965	55	2.37445	9.41e-07	3.8434	up	--	--	--	--	--	--	--	Transmembrane protein 2 GN=tmem2 OS=Danio rerio (Zebrafish) PE=2 SV=1	PREDICTED: transmembrane protein 2-like [Xenopus (Silurana) tropicalis]
c118894.graph_c0	0	0	19	2.45454	0.00753094	3.79718	up	--	--	Biological Process: monovalent inorganic cation transport (GO:0015672);; Cellular Component: integral component of membrane (GO:0016021);; Biological Process: metal ion transport (GO:0030001);;	K01540|6.79724e-41|xla:735041|atp1b4; ATPase, Na+/K+ transporting, beta 4 polypeptide; K01540 sodium/potassium-transporting ATPase subunit beta (A)	[P]	Inorganic ion transport and metabolism	Sodium / potassium ATPase beta chain	Protein ATP1B4 GN=atp1b4 OS=Xenopus laevis (African clawed frog) PE=1 SV=1	protein ATP1B4 [Xenopus laevis]
c107521.graph_c0	0	0	19	1.65778	0.00753094	3.79718	up	--	--	--	--	--	--	Xin repeat	Xin actin-binding repeat-containing protein 1 GN=Xirp1 OS=Gallus gallus (Chicken) PE=2 SV=3	PREDICTED: xin actin-binding repeat-containing protein 1-like isoform X2 [Xenopus (Silurana) tropicalis]
c87631.graph_c0	0	0	19	1.04639	0.00753094	3.79718	up	--	--	--	K14165|1.76217e-26|xtr:100135355|dusp27; dual specificity phosphatase 27 (putative); K14165 atypical dual specificity phosphatase [EC:3.1.3.16 3.1.3.48] (A)	--	--	--	--	LOC100135355 protein [Xenopus (Silurana) tropicalis]
c112752.graph_c1	0	0	19	1.85177	0.00753094	3.79718	up	--	--	--	--	--	--	--	--	PREDICTED: myopalladin isoform X5 [Xenopus (Silurana) tropicalis]
c111185.graph_c0	1	0.0555768	35	1.83364	9.64e-05	3.75394	up	--	--	--	K04612|1.0913e-11|pbi:103049770|vomeronasal type-2 receptor 26-like; K04612 calcium-sensing receptor (A)	[PT]	--	--	--	PREDICTED: vomeronasal type-2 receptor 26-like [Python bivittatus]
c99619.graph_c0	2	0.0945652	49	2.18398	5.69e-06	3.68135	up	--	--	Molecular Function: NAD(P)+-protein-arginine ADP-ribosyltransferase activity (GO:0003956);; Biological Process: protein ADP-ribosylation (GO:0006471);;	K06716|4.92201e-141|xtr:780139|art1, art2, cd296, rt6; ADP-ribosyltransferase 1 (EC:2.4.2.31); K06716 ADP-ribosyltransferase 1 [EC:2.4.2.31] (A)	--	--	NAD:arginine ADP-ribosyltransferase	Erythroblast NAD(P)(+)--arginine ADP-ribosyltransferase (Precursor) GN=MADPRT OS=Gallus gallus (Chicken) PE=2 SV=1	GPI-linked NAD(P)(+)--arginine ADP-ribosyltransferase 1 precursor [Xenopus (Silurana) tropicalis]
c111628.graph_c0	2	0.240101	49	5.54513	5.69e-06	3.68135	up	--	--	--	--	--	--	--	--	PREDICTED: RING finger protein 223 [Xenopus (Silurana) tropicalis]
c72886.graph_c0	1	0.145971	32	4.40321	0.000285857	3.63011	up	--	--	Molecular Function: G-protein coupled receptor binding (GO:0001664);; Biological Process: G-protein coupled receptor signaling pathway (GO:0007186);;	K05267|6.61042e-68|xtr:100379764|npb, ppl7, ppnpb; neuropeptide B; K05267 preproneuropeptide B (A)	--	--	Neuropeptides B and W	--	PREDICTED: neuropeptide B isoform 2 [Xenopus (Silurana) tropicalis]
c111703.graph_c0	1	0.134836	32	4.06732	0.000285857	3.63011	up	--	--	Molecular Function: catalytic activity (GO:0003824);; Biological Process: metabolic process (GO:0008152);; Cellular Component: membrane (GO:0016020);;	--	[S]	Function unknown	PAP2 superfamily	Probable lipid phosphate phosphatase PPAPDC3 GN=ppapdc3 OS=Danio rerio (Zebrafish) PE=2 SV=1	probable lipid phosphate phosphatase PPAPDC3 [Xenopus (Silurana) tropicalis]
c122849.graph_c0	6	1.29896	107	21.8364	1.77e-09	3.61432	up	[J]	Translation, ribosomal structure and biogenesis	--	--	[J]	Translation, ribosomal structure and biogenesis	Elongation factor Tu GTP binding domain	Elongation factor 1-alpha GN=eef1a OS=Danio rerio (Zebrafish) PE=2 SV=1	PREDICTED: elongation factor 1-alpha-like [Esox lucius]
c122827.graph_c0	24	3.21191	378	47.6864	1.67e-15	3.61314	up	--	--	--	--	[R]	General function prediction only	Kazal-type serine protease inhibitor domain;; Kazal-type serine protease inhibitor domain	Pancreatic secretory trypsin inhibitor GN=SPINK1 OS=Struthio camelus (Ostrich) PE=1 SV=1	PREDICTED: pancreatic secretory trypsin inhibitor-like [Xenopus (Silurana) tropicalis]
c122667.graph_c0	1	0.246227	31	7.19529	0.00041319	3.58635	up	--	--	Biological Process: protein metabolic process (GO:0019538);;	K01335|1.97708e-31|xtr:100491419|complement factor B-like; K01335 component factor B [EC:3.4.21.47] (A)	[E]	Amino acid transport and metabolism	von Willebrand factor type A domain	Complement factor B-like protease Bb fragment (Fragment) OS=Gallus gallus (Chicken) PE=1 SV=1	PREDICTED: complement factor B-like isoform X2 [Xenopus (Silurana) tropicalis]
c87400.graph_c0	83	3.24055	1206	44.3853	0	3.54253	up	--	--	Molecular Function: metalloendopeptidase activity (GO:0004222);; Molecular Function: calcium ion binding (GO:0005509);; Cellular Component: collagen trimer (GO:0005581);; Biological Process: proteolysis (GO:0006508);; Molecular Function: zinc ion binding (GO:0008270);; Biological Process: collagen catabolic process (GO:0030574);;	K01388|0|xla:495287|mmp1, col4, mmp18; matrix metallopeptidase 1 (interstitial collagenase); K01388 matrix metalloproteinase-1 (interstitial collagenase) [EC:3.4.24.7] (A)	[OW]	--	Matrixin;; Hemopexin;; Putative peptidoglycan binding domain	Matrix metalloproteinase-18 (Precursor) GN=mmp18 OS=Xenopus laevis (African clawed frog) PE=2 SV=1	Mmp18 protein [Xenopus laevis]
c111112.graph_c0	4	0.443534	72	7.52577	2.39e-07	3.52202	up	--	--	--	--	--	--	Protein of unknown function (DUF3522)	--	PREDICTED: transmembrane protein 8B-like isoform X2 [Meleagris gallopavo]
c121919.graph_c1	20	0.615724	296	8.59012	6.08e-14	3.5113	up	--	--	--	--	--	--	G8 domain	Transmembrane protein 2 GN=tmem2 OS=Danio rerio (Zebrafish) PE=2 SV=1	PREDICTED: transmembrane protein 2-like [Xenopus (Silurana) tropicalis]
c115096.graph_c0	1	0.075332	29	2.05934	0.000871339	3.49464	up	--	--	Biological Process: patterning of blood vessels (GO:0001569);; Biological Process: chondrocyte development (GO:0002063);; Biological Process: outflow tract morphogenesis (GO:0003151);; Biological Process: cardiac left ventricle morphogenesis (GO:0003214);; Cellular Component: extracellular space (GO:0005615);; Cellular Component: cytoplasm (GO:0005737);; Cellular Component: plasma membrane (GO:00…	K02176|3.89357e-81|xtr:394659|sfrp2, frp-2, sarp1, sdf-5, sfrp-2; secreted frizzled-related protein 2; K02176 secreted frizzled-related protein 2 (A)	[T]	Signal transduction mechanisms	UNC-6/NTR/C345C module	Secreted frizzled-related protein 2 (Precursor) GN=SFRP2 OS=Gallus gallus (Chicken) PE=2 SV=1	secreted frizzled-related protein 2 precursor [Xenopus (Silurana) tropicalis]
c116935.graph_c0	5	0.108654	79	1.61829	1.81e-07	3.3994	up	--	--	--	--	[TZ]	--	LIM domain	Protein-methionine sulfoxide oxidase mical3b GN=mical3b OS=Danio rerio (Zebrafish) PE=3 SV=2	PREDICTED: xin actin-binding repeat-containing protein 2 isoform X2 [Xenopus (Silurana) tropicalis]
c25282.graph_c0	2	0.373678	40	7.04497	9.84e-05	3.39801	up	--	--	--	--	--	--	Phage portal protein, lambda family	--	--
c26548.graph_c0	88	3.84766	1145	47.1922	0	3.38451	up	--	--	Molecular Function: serine-type endopeptidase inhibitor activity (GO:0004867);; Molecular Function: protein binding (GO:0005515);; Biological Process: defense response (GO:0006952);; Biological Process: regulation of cell migration (GO:0030334);; Biological Process: positive regulation of response to external stimulus (GO:0032103);; Biological Process: regulation of angiogenesis (GO:0045765);; Bi…	K03982|0|xtr:100127732|serpine1; serpin peptidase inhibitor, clade E (nexin, plasminogen activator inhibitor type 1), member 1; K03982 plasminogen activator inhibitor-1 (A)	[V]	Defense mechanisms	Serpin (serine protease inhibitor)	Neuroserpin (Precursor) GN=SERPINI1 OS=Gallus gallus (Chicken) PE=1 SV=1	LOC100127732 protein [Xenopus (Silurana) tropicalis]
c122753.graph_c0	9	0.481425	125	6.303	2.51e-09	3.33311	up	--	--	--	--	--	--	DNA packaging protein FI;; Prophage minor tail protein Z (GPZ);; Phage Head-Tail Attachment;; ATP-binding sugar transporter from pro-phage	--	--
c109742.graph_c0	2	0.210599	38	3.77192	0.000190253	3.3267	up	[RTKL]	--	Molecular Function: protein serine/threonine kinase activity (GO:0004674);; Molecular Function: ATP binding (GO:0005524);; Cellular Component: nucleus (GO:0005634);; Cellular Component: cytoplasm (GO:0005737);; Biological Process: striated muscle contraction (GO:0006941);; Biological Process: neuromuscular synaptic transmission (GO:0007274);; Biological Process: positive regulation of gene expres…	K00907|2.19421e-108|apla:101803931|MYLK2; myosin light chain kinase 2; K00907 myosin-light-chain kinase [EC:2.7.11.18] (A)	[T]	Signal transduction mechanisms	Protein kinase domain;; Protein tyrosine kinase	Myosin light chain kinase 3 GN=mylk3 OS=Danio rerio (Zebrafish) PE=2 SV=1	PREDICTED: myosin light chain kinase 2, skeletal/cardiac muscle-like, partial [Mesitornis unicolor]
c94886.graph_c0	28	1.78487	357	21.452	1.33e-13	3.31843	up	--	--	--	K17102|5.94512e-161|xtr:100493880|ehf; ets homologous factor; K17102 ETS homologous factor (A)	[K]	Transcription	Ets-domain;; Sterile alpha motif (SAM)/Pointed domain	Retroviral integration site protein Fli-1 homolog GN=fli1 OS=Xenopus laevis (African clawed frog) PE=2 SV=1	PREDICTED: ETS homologous factor [Xenopus (Silurana) tropicalis]
c75119.graph_c0	2	0.388718	37	6.77887	0.000265416	3.28968	up	--	--	Biological Process: ion transport (GO:0006811);;	K02270|1.02144e-27|xtr:100491395|cytochrome c oxidase subunit 7A1, mitochondrial-like; K02270 cytochrome c oxidase subunit 7a (A)	--	--	Cytochrome c oxidase subunit VIIa	--	PREDICTED: cytochrome c oxidase subunit 7A1, mitochondrial-like [Xenopus (Silurana) tropicalis]
c113056.graph_c0	11	0.701228	143	8.59318	1.11e-09	3.26669	up	--	--	--	K04437|0|xtr:100329116|flnc; filamin C, gamma; K04437 filamin (A)	[Z]	Cytoskeleton	Filamin/ABP280 repeat	--	PREDICTED: LOW QUALITY PROTEIN: filamin-C isoform 1 [Xenopus (Silurana) tropicalis]
c112303.graph_c0	8	0.376558	107	4.74763	2.1e-08	3.26053	up	[K]	Transcription	Molecular Function: RNA binding (GO:0003723);; Cellular Component: cytoplasm (GO:0005737);; Biological Process: mRNA processing (GO:0006397);; Biological Process: regulation of translation (GO:0006417);; Biological Process: RNA splicing (GO:0008380);; Molecular Function: sequence-specific DNA binding (GO:0043565);; Biological Process: positive regulation of transcription, DNA-templated (GO:004589…	K09277|5.57689e-58|xtr:100170415|ybx2, contrin, csda, csda3, dbpc, frgy2, msy2; Y box binding protein 2; K09277 Y-box-binding protein 2 (A)	[J]	Translation, ribosomal structure and biogenesis	'Cold-shock' DNA-binding domain	Y-box-binding protein 2-A GN=ybx2-a OS=Xenopus laevis (African clawed frog) PE=1 SV=3	Y box binding protein 2 [Xenopus (Silurana) tropicalis]
c117572.graph_c0	3	0.210463	48	3.17429	3.7e-05	3.25979	up	--	--	--	--	--	--	Reverse transcriptase (RNA-dependent DNA polymerase)	--	PREDICTED: uncharacterized protein LOC101732449 [Xenopus (Silurana) tropicalis]
c113430.graph_c0	2	0.0697894	36	1.18417	0.000371145	3.25169	up	--	--	--	--	[R]	General function prediction only	--	Kinase D-interacting substrate of 220 kDa OS=Danio rerio (Zebrafish) PE=2 SV=2	uncharacterized protein LOC100144969 [Xenopus (Silurana) tropicalis]
c29412.graph_c0	2	0.330382	36	5.60583	0.000371145	3.25169	up	--	--	--	--	--	--	Transducer of regulated CREB activity, N terminus	CREB-regulated transcription coactivator 3 GN=crtc3 OS=Xenopus tropicalis (Western clawed frog) PE=2 SV=1	unnamed protein product [Oncorhynchus mykiss]
c119737.graph_c0	5	0.38527	71	5.15709	1.21e-06	3.24834	up	[E]	Amino acid transport and metabolism	Molecular Function: glutamate decarboxylase activity (GO:0004351);; Molecular Function: glutamate-ammonia ligase activity (GO:0004356);; Molecular Function: ATP binding (GO:0005524);; Cellular Component: mitochondrion (GO:0005739);; Biological Process: glutamine biosynthetic process (GO:0006542);;	K01915|7.51659e-116|xla:432308|uncharacterized protein MGC80056; K01915 glutamine synthetase [EC:6.3.1.2] (A)	[E]	Amino acid transport and metabolism	Glutamine synthetase, catalytic domain	Glutamine synthetase GN=GLUL OS=Gallus gallus (Chicken) PE=1 SV=1	PREDICTED: glutamine synthetase [Nestor notabilis]
c96988.graph_c0	1035	40.259	11835	433.952	2.22e-16	3.21431	up	[E]	Amino acid transport and metabolism	Molecular Function: glutamate decarboxylase activity (GO:0004351);; Molecular Function: glutamate-ammonia ligase activity (GO:0004356);; Molecular Function: ATP binding (GO:0005524);; Cellular Component: mitochondrion (GO:0005739);; Biological Process: glutamine biosynthetic process (GO:0006542);;	K01915|0|xtr:394915|glul, glns, pig43, pig59, xgs; glutamate-ammonia ligase; K01915 glutamine synthetase [EC:6.3.1.2] (A)	[E]	Amino acid transport and metabolism	Glutamine synthetase, catalytic domain;; Glutamine synthetase, beta-Grasp domain	Glutamine synthetase GN=glul OS=Xenopus laevis (African clawed frog) PE=2 SV=1	Xgs protein [Xenopus laevis]
c119944.graph_c0	99	2.19213	1135	23.6907	1.22e-15	3.2041	up	[R]	General function prediction only	--	--	[R]	General function prediction only	Integrase core domain;; Ras family;; Miro-like protein;; ADP-ribosylation factor family;; Gtr1/RagA G protein conserved region;; Elongation factor Tu GTP binding domain	Ras-related protein Rab-8 (Precursor) OS=Diplobatis ommata (Ocellated electric ray) PE=2 SV=1	PREDICTED: uncharacterized protein LOC101732120 [Xenopus (Silurana) tropicalis]
c111950.graph_c0	2	0.105721	34	1.69419	0.000730828	3.17256	up	--	--	Molecular Function: prostaglandin F receptor activity (GO:0004958);; Cellular Component: extracellular region (GO:0005576);; Cellular Component: cytoplasm (GO:0005737);; Cellular Component: plasma membrane (GO:0005886);; Biological Process: G-protein coupled receptor signaling pathway (GO:0007186);; Cellular Component: integral component of membrane (GO:0016021);; Biological Process: response to …	K04262|0|xtr:100158591|ptgfr; prostaglandin F receptor (FP); K04262 prostaglandin F receptor (A)	[R]	General function prediction only	7 transmembrane receptor (rhodopsin family);; Serpentine type 7TM GPCR chemoreceptor Srv;; Serpentine type 7TM GPCR chemoreceptor Srx	Melanopsin GN=opn4 OS=Rutilus rutilus (Roach) PE=2 SV=1	prostaglandin F receptor [Xenopus (Silurana) tropicalis]
c119309.graph_c0	6	0.457864	78	5.61089	8.16e-07	3.16552	up	--	--	--	--	--	--	SH3 domain;; Variant SH3 domain;; Variant SH3 domain;; NADPH oxidase subunit p47Phox, C terminal domain	SH3 and PX domain-containing protein 2A GN=sh3pxd2a OS=Danio rerio (Zebrafish) PE=3 SV=2	LOC100145774 protein [Xenopus (Silurana) tropicalis]
c116798.graph_c0	5	0.220829	65	2.70614	5.28e-06	3.12366	up	--	--	--	--	[R]	General function prediction only	Reverse transcriptase (RNA-dependent DNA polymerase)	Transposon TX1 uncharacterized 149 kDa protein OS=Xenopus laevis (African clawed frog) PE=3 SV=1	PREDICTED: uncharacterized protein LOC100490320 [Xenopus (Silurana) tropicalis]
c115096.graph_c1	3	0.337422	43	4.55902	0.000166859	3.10608	up	--	--	Biological Process: patterning of blood vessels (GO:0001569);; Biological Process: chondrocyte development (GO:0002063);; Biological Process: outflow tract morphogenesis (GO:0003151);; Biological Process: cardiac left ventricle morphogenesis (GO:0003214);; Cellular Component: extracellular space (GO:0005615);; Cellular Component: cytoplasm (GO:0005737);; Cellular Component: plasma membrane (GO:00…	K02176|1.75534e-104|xtr:394659|sfrp2, frp-2, sarp1, sdf-5, sfrp-2; secreted frizzled-related protein 2; K02176 secreted frizzled-related protein 2 (A)	[T]	Signal transduction mechanisms	Fz domain	Secreted frizzled-related protein 2 (Precursor) GN=SFRP2 OS=Gallus gallus (Chicken) PE=2 SV=1	secreted frizzled-related protein 2 precursor [Xenopus (Silurana) tropicalis]
c87516.graph_c0	2016	139.938	20966	1371.87	3e-15	3.07817	up	--	--	--	K16451|3.29587e-58|xla:100049771|timp-1; tissue inhibitor of metalloproteinase-1; K16451 metallopeptidase inhibitor 1 (A)	[R]	General function prediction only	Tissue inhibitor of metalloproteinase	Metalloproteinase inhibitor 3 (Precursor) GN=TIMP3 OS=Scyliorhinus torazame (Cloudy catshark) PE=2 SV=1	uncharacterized protein LOC100049771 precursor [Xenopus laevis]
c122913.graph_c0	24	2.32791	260	23.7727	3.64e-11	3.0758	up	--	--	--	--	--	--	BRICHOS domain	--	PREDICTED: gastrokine-1-like [Xenopus (Silurana) tropicalis]
c106803.graph_c0	73	4.09337	759	40.1191	7.26e-14	3.05791	up	--	--	Molecular Function: hydrolase activity (GO:0016787);;	--	[O]	Posttranslational modification, protein turnover, chaperones	Papain family cysteine protease;; Cathepsin propeptide inhibitor domain (I29);; Peptidase C1-like family	Cathepsin K (Precursor) GN=CTSK OS=Gallus gallus (Chicken) PE=2 SV=1	cathepsin L precursor [Xenopus (Silurana) tropicalis]
c111112.graph_c1	11	0.61048	122	6.38248	3.35e-08	3.04009	up	--	--	--	--	--	--	Protein of unknown function (DUF3522)	Protein myomaker GN=tmem8c OS=Danio rerio (Zebrafish) PE=2 SV=1	PREDICTED: transmembrane protein 8A isoform X1 [Xenopus (Silurana) tropicalis]
c120261.graph_c0	8	0.415604	91	4.45638	4.86e-07	3.0303	up	--	--	Cellular Component: integral component of membrane (GO:0016021);;	K15377|0|xtr:100489321|slc44a4; solute carrier family 44, member 4; K15377 solute carrier family 44 (choline transporter-like protein), member 2/4/5 (A)	[I]	Lipid transport and metabolism	Plasma-membrane choline transporter	Choline transporter-like protein 4 GN=slc44a4 OS=Xenopus laevis (African clawed frog) PE=2 SV=1	PREDICTED: choline transporter-like protein 4 [Xenopus (Silurana) tropicalis]
c122194.graph_c0	38	3.23893	390	31.3353	4.2e-12	3.02055	up	--	--	--	K04437|0|xtr:100329116|flnc; filamin C, gamma; K04437 filamin (A)	[Z]	Cytoskeleton	Filamin/ABP280 repeat;; Bacterial Ig-like domain (group 1);; YtkA-like;; Y_Y_Y domain	E3 ubiquitin-protein ligase TRIM71 GN=trim71 OS=Xenopus tropicalis (Western clawed frog) PE=3 SV=1	PREDICTED: LOW QUALITY PROTEIN: filamin-C isoform 1 [Xenopus (Silurana) tropicalis]
c103265.graph_c0	2	0.427864	30	6.0499	0.00291102	2.99995	up	--	--	Biological Process: regulation of systemic arterial blood pressure by baroreceptor feedback (GO:0003025);; Molecular Function: ATP binding (GO:0005524);; Cellular Component: interstitial matrix (GO:0005614);; Biological Process: sensory perception of sound (GO:0007605);; Biological Process: sensory perception of smell (GO:0007608);; Biological Process: locomotory behavior (GO:0007626);; Molecular…	--	--	--	--	--	PREDICTED: neuron navigator 2-like isoform X1 [Anas platyrhynchos]
c108963.graph_c0	2	0.148173	30	2.09513	0.00291102	2.99995	up	--	--	--	K10352|6.25062e-68|xtr:100495065|myosin-3-like; K10352 myosin heavy chain (A)	[Z]	Cytoskeleton	Myosin tail	Myosin heavy chain, skeletal muscle, adult OS=Gallus gallus (Chicken) PE=1 SV=4	type 3 myosin heavy chain [Rana pipiens]
c122690.graph_c0	163	17.2799	1576	157.493	4.79e-14	2.96456	up	--	--	--	--	--	--	--	--	TPA: TPA_inf: HN1 protein [Xenopus laevis]
c108659.graph_c0	21	1.72646	211	16.352	7.13e-10	2.95931	up	--	--	--	--	--	--	Phage integrase family;; Reverse transcriptase-like	--	PREDICTED: uncharacterized protein LOC101735087 [Xenopus (Silurana) tropicalis]
c111216.graph_c0	2	0.221419	29	3.02645	0.00413358	2.95337	up	--	--	--	K08523|7.24373e-37|apla:101799901|HBEGF; heparin-binding EGF-like growth factor; K08523 heparin-binding EGF-like growth factor (A)	--	--	--	Heparin-binding EGF-like growth factor (Precursor) GN=HBEGF OS=Gallus gallus (Chicken) PE=1 SV=1	PREDICTED: proheparin-binding EGF-like growth factor [Struthio camelus australis]
c97073.graph_c0	2	0.223744	28	2.95278	0.00587973	2.90523	up	[R]	General function prediction only	Molecular Function: nucleotide binding (GO:0000166);; Molecular Function: mRNA 3'-UTR binding (GO:0003730);; Cellular Component: nucleus (GO:0005634);; Cellular Component: cytoplasm (GO:0005737);; Biological Process: regulation of myotube differentiation (GO:0010830);; Biological Process: regulation of mRNA stability (GO:0043488);;	--	[R]	General function prediction only	RNA recognition motif. (a.k.a. RRM, RBD, or RNP domain);; RNA recognition motif (a.k.a. RRM, RBD, or RNP domain);; RNA recognition motif. (a.k.a. RRM, RBD, or RNP domain)	RNA-binding protein 24 GN=rbm24 OS=Xenopus tropicalis (Western clawed frog) PE=2 SV=1	RNA-binding protein 24, partial [Cuculus canorus]
c112986.graph_c0	3	0.253292	37	2.94479	0.00108163	2.897	up	--	--	--	--	--	--	--	--	PREDICTED: uncharacterized protein LOC101172081 [Oryzias latipes]
c107073.graph_c0	3	0.106041	37	1.23283	0.00108163	2.897	up	[Z]	Cytoskeleton	Molecular Function: motor activity (GO:0003774);; Molecular Function: ATP binding (GO:0005524);; Cellular Component: myosin complex (GO:0016459);;	K10362|0|xtr:100496668|myo18b; myosin XVIIIB; K10362 myosin XVIII (A)	[Z]	Cytoskeleton	Myosin head (motor domain)	Myosin-11 GN=MYH11 OS=Gallus gallus (Chicken) PE=1 SV=4	PREDICTED: unconventional myosin-XVIIIb isoform X1 [Xenopus (Silurana) tropicalis]
c116948.graph_c0	8	0.41825	81	3.99193	3.89e-06	2.86519	up	--	--	--	--	--	--	--	--	PREDICTED: uncharacterized protein LOC103282659 [Anolis carolinensis]
c117320.graph_c0	4	0.434322	45	4.60591	0.00033299	2.8612	up	--	--	--	K05148|1.10947e-82|xla:444716|tnfrsf11b, ocif, opg, tr1; tumor necrosis factor receptor superfamily, member 11b; K05148 tumor necrosis factor receptor superfamily member 11B (A)	--	--	TNFR/NGFR cysteine-rich region	Tumor necrosis factor receptor superfamily member 16 (Precursor) GN=NGFR OS=Gallus gallus (Chicken) PE=3 SV=1	tumor necrosis factor receptor superfamily, member 11b precursor [Xenopus laevis]
c119101.graph_c0	584	34.1917	5200	286.987	1.97e-13	2.85237	up	--	--	--	--	--	--	Phage integrase family	--	PREDICTED: uncharacterized protein LOC100487960 isoform X1 [Xenopus (Silurana) tropicalis]
c110810.graph_c0	19	2.23276	176	19.4963	1.06e-08	2.83586	up	--	--	--	--	--	--	C2 domain	--	PREDICTED: C2 calcium-dependent domain-containing protein 4C-like [Xenopus (Silurana) tropicalis]
c71759.graph_c0	66	3.45676	584	28.833	9.98e-12	2.82358	up	[RTKL]	--	Molecular Function: transferase activity, transferring phosphorus-containing groups (GO:0016772);;	--	[T]	Signal transduction mechanisms	Protein kinase domain;; Protein tyrosine kinase	Protein kinase C beta type GN=prkcbb OS=Danio rerio (Zebrafish) PE=2 SV=1	PREDICTED: protein kinase C theta type-like, partial [Colius striatus]
c99033.graph_c0	4	0.414546	42	4.10312	0.000798123	2.76492	up	--	--	--	K09782|4.31137e-31|xtr:100145251|uncharacterized LOC100145251; K09782 amphiregulin (A)	--	--	--	Heparin-binding EGF-like growth factor (Precursor) GN=HBEGF OS=Gallus gallus (Chicken) PE=1 SV=1	uncharacterized protein LOC100145251 precursor [Xenopus (Silurana) tropicalis]
c116269.graph_c0	4	0.256378	42	2.53759	0.000798123	2.76492	up	--	--	--	--	--	--	--	--	PREDICTED: uncharacterized protein LOC103280586 [Anolis carolinensis]
c118144.graph_c0	27	1.0267	234	8.38781	3.18e-09	2.76241	up	[R]	General function prediction only	Cellular Component: extracellular region (GO:0005576);; Cellular Component: plasma membrane (GO:0005886);; Molecular Function: glycerophosphodiester phosphodiesterase activity (GO:0008889);; Biological Process: lipid catabolic process (GO:0016042);; Biological Process: choline metabolic process (GO:0019695);; Cellular Component: anchored component of membrane (GO:0031225);; Molecular Function: gl…	K08743|0|xtr:100422805|enpp6; ectonucleotide pyrophosphatase/phosphodiesterase 6; K08743 ectonucleotide pyrophosphatase/phosphodiesterase family member 6 [EC:3.1.4.-] (A)	[R]	General function prediction only	Type I phosphodiesterase / nucleotide pyrophosphatase	Ectonucleotide pyrophosphatase/phosphodiesterase family member 6 (Precursor) GN=enpp6 OS=Xenopus laevis (African clawed frog) PE=2 SV=1	PREDICTED: ectonucleotide pyrophosphatase/phosphodiesterase family member 6 isoform X1 [Chrysemys picta bellii]
c26118.graph_c0	99	3.19874	831	25.3103	9.16e-12	2.75501	up	--	--	Molecular Function: structural molecule activity (GO:0005198);; Cellular Component: cytoplasm (GO:0005737);; Cellular Component: intermediate filament (GO:0005882);;	K07610|0|xla:446868|des.1-b, cmd1l, csm1, csm2, des-b, des.1, desm; desmin, gene 1; K07610 desmin (A)	--	--	Intermediate filament protein;; Intermediate filament head (DNA binding) region	Desmin GN=des OS=Xenopus laevis (African clawed frog) PE=2 SV=1	desmin, gene 1 [Xenopus laevis]
c80842.graph_c0	35	1.28418	297	10.2722	9.08e-10	2.74411	up	--	--	Cellular Component: membrane (GO:0016020);;	K05462|7.93172e-116|xtr:496827|efna3, efl2, ehk1-l, eplg3, lerk3; ephrin-A3; K05462 ephrin-A (A)	[T]	Signal transduction mechanisms	Ephrin	Ephrin-A5 (Precursor) GN=EFNA5 OS=Gallus gallus (Chicken) PE=2 SV=1	ephrin-A3 precursor [Xenopus (Silurana) tropicalis]
c89756.graph_c0	3	0.169432	33	1.75687	0.00389219	2.73862	up	--	--	--	K04612|1.41507e-08|lcm:102354957|extracellular calcium-sensing receptor-like; K04612 calcium-sensing receptor (A)	--	--	--	--	PREDICTED: extracellular calcium-sensing receptor-like [Latimeria chalumnae]
c120949.graph_c0	24	0.521538	203	4.15836	1.3e-08	2.72105	up	--	--	--	K08868|0|xtr:100496942|alpk3; alpha-kinase 3; K08868 alpha-kinase (A)	--	--	Alpha-kinase family;; Immunoglobulin I-set domain	--	PREDICTED: alpha-protein kinase 3-like isoform X1 [Xenopus (Silurana) tropicalis]
c118795.graph_c1	5	0.595467	48	5.38865	0.000450504	2.69753	up	--	--	--	K02857|1.10412e-68|phi:102100139|RHBDL3; rhomboid, veinlet-like 3 (Drosophila); K02857 rhomboid-related protein 1/2/3 [EC:3.4.21.105] (A)	[T]	Signal transduction mechanisms	--	--	PREDICTED: rhomboid-related protein 3, partial [Pelecanus crispus]
c115760.graph_c0	308	18.6826	2462	140.776	5.24e-12	2.69454	up	--	--	--	K05149|3.4473e-32|xla:399035|tnfrsf12a, fn14; tumor necrosis factor receptor superfamily, member 12A; K05149 tumor necrosis factor receptor superfamily member 12A (A)	--	--	Tumour necrosis factor receptor stn_TNFRSF12A_TNFR domain	--	Fn14 protein [Xenopus laevis]
c118795.graph_c0	15	1.21301	127	9.68118	4.76e-07	2.68814	up	--	--	Molecular Function: serine-type endopeptidase activity (GO:0004252);; Molecular Function: calcium ion binding (GO:0005509);; Biological Process: proteolysis (GO:0006508);; Cellular Component: integral component of membrane (GO:0016021);;	K02857|3.12271e-106|amj:102572803|RHBDL3; rhomboid, veinlet-like 3 (Drosophila); K02857 rhomboid-related protein 1/2/3 [EC:3.4.21.105] (A)	[T]	Signal transduction mechanisms	Rhomboid family	--	PREDICTED: rhomboid-related protein 3 [Alligator mississippiensis]
c117499.graph_c0	5	0.384477	47	3.40682	0.000592157	2.66807	up	--	--	--	K05221|4.24412e-130|mgp:100547282|P2RX6; purinergic receptor P2X, ligand-gated ion channel, 6; K05221 P2X purinoceptor 6 (A)	--	--	ATP P2X receptor	--	PREDICTED: P2X purinoceptor 6 [Meleagris gallopavo]
c102587.graph_c0	117	10.4443	916	77.0801	3.81e-11	2.65692	up	--	--	--	--	--	--	--	--	unnamed protein product [Oncorhynchus mykiss]
c112887.graph_c0	4	0.325568	38	2.91552	0.00261048	2.62567	up	--	--	--	--	--	--	--	--	Small transmembrane and glycosylated protein homolog [Rana catesbeiana]
c25790.graph_c0	92	9.35771	705	67.5962	1.31e-10	2.62272	up	--	--	--	--	--	--	--	--	12-RF amide peptide [Rana catesbeiana]
c25727.graph_c0	88	3.36047	664	23.9022	2.26e-10	2.59976	up	[R]	General function prediction only	Biological Process: negative regulation of transcription from RNA polymerase II promoter (GO:0000122);; Molecular Function: transcription regulatory region sequence-specific DNA binding (GO:0000976);; Molecular Function: RNA polymerase II core promoter proximal region sequence-specific DNA binding transcription factor activity (GO:0000982);; Cellular Component: nucleus (GO:0005634);; Biological P…	K09203|0|xtr:100038164|egr1, EGR-1, Xegr-1, at225, egr, g0s30, krox-24, ngfi-a, tis8, zif-268, znf225; early growth response 1; K09203 early growth response protein 1 (A)	[R]	General function prediction only	Domain of unknown function (DUF3432);; Domain of unknown function (DUF3446);; Zinc-finger double domain;; Zinc finger, C2H2 type;; C2H2-type zinc finger	Early growth response protein 1 {ECO:0000250|UniProtKB:P08046} OS=Xenopus tropicalis (Western clawed frog) PE=2 SV=2	early growth response protein 1 [Xenopus (Silurana) tropicalis]
c100047.graph_c0	169	4.45682	1266	31.472	5.97e-11	2.59712	up	--	--	Biological Process: regulation of cytokine production (GO:0001817);; Biological Process: toll-like receptor signaling pathway (GO:0002224);;	--	[T]	Signal transduction mechanisms	Leucine rich repeat;; Leucine Rich repeats (2 copies);; Leucine rich repeats (6 copies);; Leucine Rich Repeat;; Leucine Rich repeat;; Leucine rich repeat	Phospholipase A2 inhibitor (Precursor) OS=Gloydius brevicaudus siniticus (Chinese mamushi) PE=1 SV=1	PREDICTED: toll-like receptor 5-like [Xenopus (Silurana) tropicalis]
c25661.graph_c0	4	0.607934	37	5.3009	0.00352123	2.58865	up	--	--	--	--	--	--	--	--	PREDICTED: uncharacterized protein LOC100493512 [Xenopus (Silurana) tropicalis]
c100628.graph_c0	78	2.88477	584	20.3602	4.12e-10	2.58653	up	--	--	Biological Process: morphogenesis of an epithelium (GO:0002009);; Cellular Component: plasma membrane (GO:0005886);;	K06737|2.92545e-123|xla:379260|epcam-b, tacstd1; epithelial cell adhesion molecule; K06737 tumor-associated calcium signal transducer 1 (A)	--	--	Thyroglobulin type-1 repeat	Epithelial cell adhesion molecule (Precursor) GN=EPCAM OS=Gallus gallus (Chicken) PE=2 SV=1	MGC54031 protein [Xenopus laevis]
c121039.graph_c0	42	4.84527	315	34.2555	6.05e-09	2.57353	up	--	--	--	K10357|0|xtr:100495210|myo5c; myosin VC; K10357 myosin V (A)	[Z]	Cytoskeleton	DIL domain	Unconventional myosin-Va GN=MYO5A OS=Gallus gallus (Chicken) PE=1 SV=1	PREDICTED: unconventional myosin-Vc [Xenopus (Silurana) tropicalis]
c116944.graph_c0	21	2.11647	158	15.0107	4.11e-07	2.54534	up	--	--	--	--	--	--	Leucine rich adaptor protein	--	PREDICTED: uncharacterized protein LOC100379924 isoform X2 [Xenopus (Silurana) tropicalis]
c108039.graph_c0	139	4.2499	991	28.562	3.14e-10	2.52402	up	--	--	--	--	--	--	Olfactomedin-like domain	Olfactomedin (Precursor) OS=Lithobates catesbeiana (American bullfrog) PE=1 SV=1	olfactomedin 4 precursor [Xenopus laevis]
c116605.graph_c0	15	0.450567	113	3.19962	4.36e-06	2.52168	up	--	--	Cellular Component: Z disc (GO:0030018);; Biological Process: regulation of cell migration (GO:0030334);; Biological Process: cardiac muscle fiber development (GO:0048739);; Molecular Function: actin filament binding (GO:0051015);;	--	--	--	Immunoglobulin I-set domain	Myosin light chain kinase, smooth muscle, deglutamylated form GN=Mylk OS=Gallus gallus (Chicken) PE=1 SV=2	PREDICTED: nexilin [Buceros rhinoceros silvestris]
c63453.graph_c0	48	2.11197	345	14.3093	8.45e-09	2.51655	up	--	--	Molecular Function: thyroxine 5'-deiodinase activity (GO:0004800);; Cellular Component: plasma membrane (GO:0005886);; Cellular Component: endosome membrane (GO:0010008);; Cellular Component: integral component of membrane (GO:0016021);; Molecular Function: thyroxine 5-deiodinase activity (GO:0033798);; Biological Process: hormone biosynthetic process (GO:0042446);; Biological Process: oxidation-…	K07754|1.87158e-148|xla:397779|dio3, 5DIII, DIOIII, XL-15, itdi3, txdi3; deiodinase, iodothyronine, type 3 (EC:1.97.1.11); K07754 thyroxine 5-deiodinase [EC:1.97.1.11] (A)	--	--	Iodothyronine deiodinase;; Iodothyronine deiodinase	Type III iodothyronine deiodinase GN=dio3 OS=Xenopus laevis (African clawed frog) PE=1 SV=2	type III iodothyronine deiodinase [Xenopus laevis]
c117763.graph_c0	10	1.0206	77	7.40795	5.79e-05	2.50958	up	[IQR]	--	Molecular Function: 11-beta-hydroxysteroid dehydrogenase [NAD(P)] activity (GO:0003845);; Biological Process: oxidation-reduction process (GO:0055114);;	K00071|1.86244e-116|xla:444491|hsd11b2; hydroxysteroid (11-beta) dehydrogenase 2; K00071 corticosteroid 11-beta-dehydrogenase isozyme 2 [EC:1.1.1.-] (A)	[QR]	--	Enoyl-(Acyl carrier protein) reductase;; short chain dehydrogenase	D-beta-hydroxybutyrate dehydrogenase, mitochondrial (Precursor) GN=BDH1 OS=Gallus gallus (Chicken) PE=2 SV=1	hydroxysteroid (11-beta) dehydrogenase 2 [Xenopus laevis]
c86783.graph_c0	178	3.14033	1226	20.389	5.18e-10	2.47652	up	[M]	Cell wall/membrane/envelope biogenesis	Molecular Function: glycogen (starch) synthase activity (GO:0004373);; Cellular Component: cytoplasm (GO:0005737);; Biological Process: glycogen biosynthetic process (GO:0005978);; Biological Process: heart development (GO:0007507);; Cellular Component: inclusion body (GO:0016234);; Molecular Function: protein kinase binding (GO:0019901);;	K00693|0|xtr:100490155|glycogen [starch] synthase, muscle-like; K00693 glycogen(starch) synthase [EC:2.4.1.11] (A)	[G]	Carbohydrate transport and metabolism	Glycogen synthase;; Glycosyl transferases group 1;; Starch synthase catalytic domain	--	PREDICTED: glycogen [starch] synthase, muscle-like isoformX1 [Xenopus (Silurana) tropicalis]
c119779.graph_c0	4	0.352789	34	2.82674	0.00868635	2.47152	up	--	--	--	--	[BD]	--	DDE superfamily endonuclease	--	PREDICTED: pogo transposable element with KRAB domain-like [Latimeria chalumnae]
c119138.graph_c0	12	0.266683	87	1.82257	4.15e-05	2.44551	up	[RTKL]	--	Biological Process: G2/M transition of mitotic cell cycle (GO:0000086);; Molecular Function: nucleotide binding (GO:0000166);; Molecular Function: protein serine/threonine kinase activity (GO:0004674);; Cellular Component: nucleoplasm (GO:0005654);; Cellular Component: centrosome (GO:0005813);; Biological Process: cellular response to DNA damage stimulus (GO:0006974);; Biological Process: mitotic…	K16309|0|xtr:100145700|mastl, GW, GWL, MAST-L, greatwall, thc2; microtubule associated serine/threonine kinase-like (EC:2.7.11.1); K16309 serine/threonine-protein kinase greatwall [EC:2.7.11.1] (A)	[TR]	--	Protein kinase domain;; Protein tyrosine kinase	Serine/threonine-protein kinase greatwall GN=mastl OS=Xenopus tropicalis (Western clawed frog) PE=2 SV=1	serine/threonine-protein kinase greatwall [Xenopus (Silurana) tropicalis]
c122333.graph_c0	27	0.857296	187	5.59706	4.43e-07	2.4412	up	[O]	Posttranslational modification, protein turnover, chaperones	Molecular Function: ATP binding (GO:0005524);; Biological Process: response to stress (GO:0006950);;	K03283|0|xtr:100037899|hsp70, xhsp70; heat shock 70kDa protein; K03283 heat shock 70kDa protein 1/8 (A)	[O]	Posttranslational modification, protein turnover, chaperones	Hsp70 protein;; NAD-specific glutamate dehydrogenase	Heat shock 70 kDa protein OS=Xenopus laevis (African clawed frog) PE=2 SV=1	heat shock protein 70 [Pelophylax lessonae]
c107530.graph_c0	24	0.986773	165	6.39501	1.06e-06	2.42443	up	[R]	General function prediction only	Molecular Function: GTPase activity (GO:0003924);; Molecular Function: GTP binding (GO:0005525);; Biological Process: GTP catabolic process (GO:0006184);; Biological Process: small GTPase mediated signal transduction (GO:0007264);; Cellular Component: membrane (GO:0016020);; Biological Process: mesendoderm development (GO:0048382);;	K07853|7.51467e-142|xtr:548491|rasl11b; RAS-like, family 11, member B; K07853 Ras-like protein family member 11B (A)	[R]	General function prediction only	Ras family;; Miro-like protein;; 50S ribosome-binding GTPase;; Ferrous iron transport protein B;; Elongation factor Tu GTP binding domain	Ras-like protein family member 11B OS=Xenopus tropicalis (Western clawed frog) PE=2 SV=1	ras-like protein family member 11B [Xenopus (Silurana) tropicalis]
c122347.graph_c0	8	1.3974	59	9.71484	0.000522849	2.41756	up	--	--	--	--	--	--	--	--	unnamed protein product [Oncorhynchus mykiss]
c122724.graph_c0	263	15.9754	1689	96.7115	2.19e-09	2.37818	up	--	--	Molecular Function: sulfotransferase activity (GO:0008146);;	--	[R]	General function prediction only	Sulfotransferase domain	Sulfotransferase family cytosolic 1B member 1 GN=SULT1B1 OS=Gallus gallus (Chicken) PE=2 SV=1	Sulfotransferase 6B1 [Rana catesbeiana]
c116223.graph_c2	908	38.8877	5781	233.389	2.7e-09	2.36946	up	--	--	Cellular Component: nucleus (GO:0005634);; Cellular Component: cytoplasm (GO:0005737);; Biological Process: negative regulation of cell proliferation (GO:0008285);; Molecular Function: enzyme binding (GO:0019899);; Biological Process: regulation of apoptotic process (GO:0042981);; Biological Process: positive regulation of endothelial cell differentiation (GO:0045603);; Biological Process: positi…	K14443|4.47859e-97|xtr:394522|btg1, xbtg1; B-cell translocation gene 1, anti-proliferative; K14443 protein Tob/BTG (A)	[TR]	--	BTG family	Protein BTG1 GN=BTG1 OS=Gallus gallus (Chicken) PE=2 SV=1	B-cell translocation gene 1, anti-proliferative [Xenopus (Silurana) tropicalis]
c119491.graph_c0	11	0.753693	76	4.9087	0.000159945	2.36765	up	--	--	--	--	--	--	Neurexophilin;; Filamin/ABP280 repeat	NXPE family member 3 (Precursor) GN=nxpe3 OS=Danio rerio (Zebrafish) PE=2 SV=1	PREDICTED: NXPE family member 3-like [Xenopus (Silurana) tropicalis]
c118675.graph_c0	42	2.30951	267	13.8399	2.58e-07	2.33623	up	--	--	--	K02098|3.70297e-170|xtr:100490419|spire2; spire homolog 2 (Drosophila); K02098 spire (A)	--	--	--	Protein spire homolog 2 GN=spire2 OS=Danio rerio (Zebrafish) PE=2 SV=1	PREDICTED: protein spire homolog 2 isoform X2 [Xenopus (Silurana) tropicalis]
c109506.graph_c0	5	0.372633	37	2.59935	0.00964331	2.33474	up	--	--	Molecular Function: beta-amyloid binding (GO:0001540);; Molecular Function: glycoprotein binding (GO:0001948);; Cellular Component: cytosol (GO:0005829);; Biological Process: glycoprotein catabolic process (GO:0006516);; Cellular Component: SCF ubiquitin ligase complex (GO:0019005);; Molecular Function: carbohydrate binding (GO:0030246);; Biological Process: ER-associated ubiquitin-dependent prot…	K10099|9.51601e-75|amj:102573853|FBXO2; F-box protein 2; K10099 F-box protein 2 (A)	--	--	F-box associated region	F-box only protein 50 OS=Danio rerio (Zebrafish) PE=2 SV=2	PREDICTED: F-box only protein 2 [Alligator mississippiensis]
c120895.graph_c0	16	0.573546	105	3.54804	3.22e-05	2.33073	up	--	--	Biological Process: regulation of transcription from RNA polymerase II promoter (GO:0006357);; Biological Process: mitochondrial transport (GO:0006839);; Biological Process: proton transport (GO:0015992);; Cellular Component: integral component of membrane (GO:0016021);; Molecular Function: oxidative phosphorylation uncoupler activity (GO:0017077);; Cellular Component: mitochondrial membrane (GO:…	--	[C]	Energy production and conversion	Mitochondrial carrier protein	Mitochondrial uncoupling protein 2 GN=ucp2 OS=Cyprinus carpio (Common carp) PE=2 SV=1	PREDICTED: mitochondrial uncoupling protein 2-like isoform X1 [Xenopus (Silurana) tropicalis]
c115131.graph_c0	11	1.13416	74	7.19223	0.000238804	2.32992	up	[R]	General function prediction only	Molecular Function: kinase activity (GO:0016301);; Biological Process: phosphorylation (GO:0016310);; Molecular Function: adenyl nucleotide binding (GO:0030554);;	K07200|2.29967e-174|xla:100127310|prkag3, prkag3-a; protein kinase, AMP-activated, gamma 3 non-catalytic subunit; K07200 5'-AMP-activated protein kinase, regulatory gamma subunit (A)	[C]	Energy production and conversion	CBS domain	--	AMP-activated protein kinase, non-catalytic gamma-3 subunit [Xenopus (Silurana) tropicalis]
c116794.graph_c0	8	0.29456	55	1.90896	0.00133244	2.31883	up	--	--	Cellular Component: nucleus (GO:0005634);; Biological Process: regulation of transcription, DNA-templated (GO:0006355);; Biological Process: neural crest cell development (GO:0014032);; Biological Process: embryonic viscerocranium morphogenesis (GO:0048703);;	--	--	--	Vestigial/Tondu family	--	vestigial-like family member 2 [Xenopus (Silurana) tropicalis]
c121621.graph_c0	39	1.54684	242	9.04791	6.14e-07	2.29906	up	--	--	--	--	[R]	General function prediction only	Reverse transcriptase (RNA-dependent DNA polymerase);; Reverse transcriptase (RNA-dependent DNA polymerase)	--	PREDICTED: uncharacterized protein LOC101734130, partial [Xenopus (Silurana) tropicalis]
c102178.graph_c0	580	21.1211	3497	120.043	9.69e-09	2.29007	up	--	--	--	K17284|0|xla:398143|plin2, adfp, adipophilin, adrp, fatvg; perilipin 2; K17284 perilipin-2 (A)	--	--	Perilipin family	--	perilipin 2 [Xenopus laevis]
c118796.graph_c0	24	0.62297	147	3.59687	9.81e-06	2.25934	up	--	--	--	--	[T]	Signal transduction mechanisms	RhoGEF domain	--	PREDICTED: pleckstrin homology domain-containing family G member 5-like isoform X2 [Xenopus (Silurana) tropicalis]
c118936.graph_c0	25	1.14889	149	6.4547	1.3e-05	2.22249	up	--	--	--	--	[S]	Function unknown	Calcium-activated chloride channel	Anoctamin-10 GN=ano10 OS=Danio rerio (Zebrafish) PE=2 SV=1	PREDICTED: anoctamin-5 [Struthio camelus australis]
c118203.graph_c0	17	1.22963	103	7.02284	8.49e-05	2.22183	up	--	--	--	--	--	--	Immunoglobulin V-set domain	--	PREDICTED: SLAM family member 5-like [Xenopus (Silurana) tropicalis]
c86724.graph_c0	19	0.861363	114	4.87179	5.28e-05	2.21581	up	--	--	--	K09208|6.26668e-47|xtr:100101699|klf13, bteb3, fklf2, nslp1, rflat-1, rflat1; Kruppel-like factor 13; K09208 krueppel-like factor 9/13/14/16 (A)	[R]	General function prediction only	--	Transcription factor Sp3 GN=SP3 OS=Gallus gallus (Chicken) PE=1 SV=1	Kruppel-like factor 13 [Xenopus (Silurana) tropicalis]
c44327.graph_c0	12	1.16446	73	6.67754	0.000608221	2.19699	up	[F]	Nucleotide transport and metabolism	--	K10524|1.40061e-91|apla:101792444|NMRK2; nicotinamide riboside kinase 2; K10524 nicotinamide/nicotinate riboside kinase [EC:2.7.1.22 2.7.1.173] (A)	[F]	Nucleotide transport and metabolism	AAA domain	--	Nicotinamide riboside kinase 2, partial [Anas platyrhynchos]
c122757.graph_c0	339	14.0859	1911	74.8508	5.32e-08	2.19144	up	--	--	Biological Process: regulation of protein phosphorylation (GO:0001932);; Biological Process: protein ubiquitination (GO:0016567);; Biological Process: intracellular signal transduction (GO:0035556);; Biological Process: regulation of growth (GO:0040008);; Biological Process: positive regulation of cell differentiation (GO:0045597);; Biological Process: negative regulation of insulin receptor sign…	K04696|9.20367e-105|xtr:448204|socs3, atod4, cis3, cish3, socs-3, ssi-3, ssi3, xsocs3; suppressor of cytokine signaling 3; K04696 suppressor of cytokine signaling 3 (A)	[T]	Signal transduction mechanisms	SH2 domain;; SOCS box	Suppressor of cytokine signaling 3 GN=SOCS3 OS=Gallus gallus (Chicken) PE=2 SV=1	suppressor of cytokine signaling 3 [Xenopus (Silurana) tropicalis]
c91495.graph_c0	24	1.18572	139	6.47349	2.72e-05	2.17943	up	[R]	General function prediction only	Molecular Function: GTP binding (GO:0005525);; Cellular Component: intracellular (GO:0005622);; Biological Process: small GTPase mediated signal transduction (GO:0007264);; Cellular Component: membrane (GO:0016020);;	K07531|8.39711e-154|xla:380077|rnd1, XRnd1, rho6; Rho family GTPase 1; K07531 Rho family GTPase 1 (A)	[R]	General function prediction only	Ras family;; Miro-like protein;; ADP-ribosylation factor family	Rho-related GTP-binding protein RhoC (Precursor) GN=RHOC OS=Gallus gallus (Chicken) PE=1 SV=1	Rho family GTPase 1 [Xenopus laevis]
c121140.graph_c0	156	4.02742	873	21.2456	1.12e-07	2.17628	up	--	--	--	K14443|3.14743e-52|xla:734504|btg5, xbtg-x; B-cell translocation gene 5; K14443 protein Tob/BTG (A)	[TR]	--	BTG family	Maternal B9.10 protein OS=Xenopus laevis (African clawed frog) PE=2 SV=1	B-cell translocation gene 5 [Xenopus laevis]
c121094.graph_c2	904	12.1025	4972	62.7463	1.16e-07	2.15839	up	--	--	--	--	[L]	Replication, recombination and repair	hAT family C-terminal dimerisation region	--	PREDICTED: zinc finger BED domain-containing protein 6-like [Chrysemys picta bellii]
c119569.graph_c0	45	1.58703	250	8.31123	3.27e-06	2.14498	up	--	--	Molecular Function: RNA binding (GO:0003723);; Molecular Function: endoribonuclease activity (GO:0004521);; Cellular Component: extracellular region (GO:0005576);; Molecular Function: metal ion binding (GO:0046872);; Biological Process: nucleic acid phosphodiester bond hydrolysis (GO:0090305);;	K14648|1.80525e-153|xla:100126655|endou-d, XendoU-D; Poly(U)-specific endoribonuclease-D; K14648 poly(U)-specific endoribonuclease [EC:3.1.-.-] (A)	[R]	General function prediction only	Endoribonuclease XendoU	Poly(U)-specific endoribonuclease-D (Precursor) GN=endou-d OS=Xenopus laevis (African clawed frog) PE=2 SV=1	poly(U)-specific endoribonuclease-D precursor [Xenopus laevis]
c120203.graph_c0	17	0.734993	97	3.95328	0.000222818	2.1365	up	--	--	Molecular Function: GTPase activator activity (GO:0005096);; Cellular Component: cytoplasm (GO:0005737);; Cellular Component: plasma membrane (GO:0005886);; Biological Process: termination of G-protein coupled receptor signaling pathway (GO:0038032);; Biological Process: positive regulation of GTPase activity (GO:0043547);;	K16449|1.20376e-34|xla:394324|rgs4, XRgs4, XRgs4a, rgs4-A; regulator of G-protein signaling 4; K16449 regulator of G-protein signaling (A)	[T]	Signal transduction mechanisms	--	Regulator of G-protein signaling 4 GN=RGS4 OS=Gallus gallus (Chicken) PE=2 SV=1	RGS4 protein [Xenopus laevis]
c109275.graph_c0	32	2.53867	178	13.3115	1.38e-05	2.1351	up	--	--	--	--	[R]	General function prediction only	Fibrinogen beta and gamma chains, C-terminal globular domain	Fibrinogen gamma chain (Precursor) GN=fgg OS=Xenopus laevis (African clawed frog) PE=2 SV=1	novel protein similar to human angiopoietin-like ANGPTL [Xenopus (Silurana) tropicalis]
c118797.graph_c0	15	1.25046	86	6.75814	0.000410114	2.13359	up	--	--	Cellular Component: proteinaceous extracellular matrix (GO:0005578);;	--	[W]	Extracellular structures	Spondin_N;; Thrombospondin type 1 domain	Spondin-1 (Precursor) GN=SPON1 OS=Gallus gallus (Chicken) PE=2 SV=1	spondin 2, extracellular matrix protein [Xenopus laevis]
c119899.graph_c0	117	4.51793	635	23.1142	3.56e-07	2.12935	up	--	--	--	--	--	--	--	--	PREDICTED: carcinoembryonic antigen-related cell adhesion molecule 2-like isoform X3 [Xenopus (Silurana) tropicalis]
c121179.graph_c1	55	3.21031	301	16.5616	2.12e-06	2.12869	up	--	--	Biological Process: MAPK cascade (GO:0000165);; Molecular Function: receptor signaling protein activity (GO:0005057);; Molecular Function: insulin receptor binding (GO:0005158);; Molecular Function: phospholipid binding (GO:0005543);; Biological Process: transmembrane receptor protein tyrosine kinase signaling pathway (GO:0007169);; Biological Process: nervous system development (GO:0007399);; Mo…	--	[T]	Signal transduction mechanisms	PTB domain (IRS-1 type)	Docking protein 3 GN=DOK3 OS=Gallus gallus (Chicken) PE=1 SV=1	docking protein 4 [Xenopus (Silurana) tropicalis]
c110253.graph_c1	52	2.09038	284	10.762	2.7e-06	2.12439	up	--	--	--	--	--	--	SIR2-like domain	--	family with sequence similarity 118, member B [Xenopus (Silurana) tropicalis]
c58542.graph_c0	9	1.75467	53	9.74045	0.0046574	2.11789	up	--	--	--	K14754|1.99883e-29|xla:100861583|mx1; myxovirus influenza virus resistance 1; K14754 interferon-induced GTP-binding protein Mx1 (A)	[UR]	--	Dynamin central region	Interferon-induced GTP-binding protein Mx2 OS=Oncorhynchus mykiss (Rainbow trout) PE=2 SV=1	myxovirus influenza virus resistance 1 [Xenopus laevis]
c121686.graph_c0	8	1.15703	47	6.40772	0.00888221	2.09845	up	--	--	Molecular Function: GTPase activity (GO:0003924);; Molecular Function: calcium ion binding (GO:0005509);; Molecular Function: GTP binding (GO:0005525);; Cellular Component: lipid particle (GO:0005811);; Cellular Component: plasma membrane (GO:0005886);; Biological Process: GTP catabolic process (GO:0006184);; Biological Process: intracellular protein transport (GO:0006886);; Biological Process: e…	--	[TU]	--	--	--	LOC495040 protein, partial [Xenopus laevis]
c122451.graph_c1	9	0.913177	52	4.97356	0.005842	2.09116	up	--	--	--	--	[R]	General function prediction only	--	Transposon TX1 uncharacterized 149 kDa protein OS=Xenopus laevis (African clawed frog) PE=3 SV=1	PREDICTED: uncharacterized protein LOC102366391 [Latimeria chalumnae]
c113672.graph_c0	10	0.517273	57	2.77937	0.00396557	2.08515	up	--	--	--	--	[WV]	--	von Willebrand factor type D domain;; TILa domain;; Trypsin Inhibitor like cysteine rich domain	Alpha-tectorin (Precursor) GN=TECTA OS=Gallus gallus (Chicken) PE=1 SV=1	PREDICTED: IgGFc-binding protein-like [Xenopus (Silurana) tropicalis]
c103836.graph_c0	11	1.21169	62	6.43785	0.00276875	2.0801	up	--	--	--	--	--	--	Domain of unknown function (DUF4501)	--	uncharacterized protein LOC733821 [Xenopus (Silurana) tropicalis]
c115112.graph_c0	83	2.44946	436	12.1291	1.52e-06	2.0778	up	[RTKL]	--	Biological Process: G1/S transition of mitotic cell cycle (GO:0000082);; Molecular Function: nucleotide binding (GO:0000166);; Molecular Function: protein kinase activity (GO:0004672);; Biological Process: protein phosphorylation (GO:0006468);; Biological Process: apoptotic process (GO:0006915);; Biological Process: cell proliferation (GO:0008283);; Biological Process: regulation of cellular meta…	K08807|1.52975e-116|lcm:102349852|serine/threonine-protein kinase pim-3-like; K08807 proto-oncogene serine/threonine-protein kinase Pim-3 [EC:2.7.11.1] (A)	[T]	Signal transduction mechanisms	Protein kinase domain;; Protein tyrosine kinase;; Kinase-like;; Lipopolysaccharide kinase (Kdo/WaaP) family	Serine/threonine-protein kinase pim-3 GN=PIM3 OS=Coturnix coturnix japonica (Japanese quail) PE=2 SV=1	PREDICTED: serine/threonine-protein kinase pim-3-like [Latimeria chalumnae]
c113707.graph_c0	15	0.871743	82	4.49224	0.000826378	2.06606	up	--	--	--	--	--	--	Fez1	NEDD4-binding protein 3 homolog OS=Gallus gallus (Chicken) PE=2 SV=1	PREDICTED: NEDD4-binding protein 3 isoform X1 [Xenopus (Silurana) tropicalis]
c101104.graph_c0	253	18.612	1301	90.2196	5.38e-07	2.05768	up	--	--	Molecular Function: metalloendopeptidase activity (GO:0004222);; Biological Process: proteolysis (GO:0006508);; Molecular Function: zinc ion binding (GO:0008270);; Cellular Component: extracellular matrix (GO:0031012);;	K01403|5.83454e-144|xla:100037129|mmp-9th; matrix metalloproteinase-9TH; K01403 matrix metalloproteinase-9 (gelatinase B) [EC:3.4.24.35] (A)	[OW]	--	Matrixin;; Fibronectin type II domain;; Putative peptidoglycan binding domain	72 kDa type IV collagenase (Precursor) GN=MMP2 OS=Gallus gallus (Chicken) PE=1 SV=1	Mmp-9th protein [Xenopus laevis]
c122696.graph_c0	1094	25.9098	5571	124.374	8.48e-07	2.04757	up	--	--	Biological Process: sprouting angiogenesis (GO:0002040);; Molecular Function: scavenger receptor activity (GO:0005044);; Biological Process: proteolysis (GO:0006508);; Biological Process: immune response (GO:0006955);; Molecular Function: cysteine-type peptidase activity (GO:0008234);; Biological Process: negative regulation of peptidase activity (GO:0010466);; Molecular Function: polysaccharide …	--	[R]	General function prediction only	Papain family cysteine protease	Cathepsin B heavy chain (Precursor) GN=CTSB OS=Gallus gallus (Chicken) PE=2 SV=1	LOC100124858 protein [Xenopus (Silurana) tropicalis]
c120848.graph_c0	36	1.61318	187	7.89903	2.97e-05	2.04155	up	--	--	--	--	--	--	FAST kinase-like protein, subdomain 2;; FAST kinase-like protein, subdomain 1;; RAP domain	FAST kinase domain-containing protein 1 GN=fastkd1 OS=Xenopus tropicalis (Western clawed frog) PE=2 SV=1	PREDICTED: FAST kinase domain-containing protein 5 [Xenopus (Silurana) tropicalis]
c121967.graph_c1	9	1.19362	50	6.25092	0.0091932	2.03616	up	--	--	--	--	--	--	--	--	RNA-directed DNA polymerase from mobile element jockey, partial [Calypte anna]
c115907.graph_c0	41	2.25095	208	10.7646	2.77e-05	2.012	up	--	--	--	--	--	--	Domain of unknown function (DUF4571)	--	chromosome 21 open reading frame 62 precursor [Xenopus (Silurana) tropicalis]
c116493.graph_c0	111	4.69301	33	1.31521	6.58e-05	-2.00206	down	[R]	General function prediction only	Molecular Function: zinc ion binding (GO:0008270);; Biological Process: catabolic process (GO:0009056);; Molecular Function: hydrolase activity, acting on ester bonds (GO:0016788);;	K07048|0|xla:380146|pter; phosphotriesterase related; K07048 phosphotriesterase-related protein (A)	--	--	Phosphotriesterase family	Phosphotriesterase-related protein GN=pter OS=Xenopus laevis (African clawed frog) PE=2 SV=1	phosphotriesterase-related protein [Xenopus laevis]
c100698.graph_c1	1868	32.4617	572	9.37005	2.83e-07	-2.00418	down	[R]	General function prediction only	Cellular Component: histone acetyltransferase complex (GO:0000123);; Molecular Function: phosphatidylinositol-3,4,5-trisphosphate binding (GO:0005547);; Cellular Component: centrosome (GO:0005813);; Cellular Component: cytosol (GO:0005829);; Cellular Component: plasma membrane (GO:0005886);; Biological Process: regulation of glycolytic process (GO:0006110);; Biological Process: protein O-linked g…	K09667|0|xtr:553157|ogt; O-linked N-acetylglucosamine (GlcNAc) transferase; K09667 protein O-GlcNAc transferase [EC:2.4.1.255] (A)	[GOT]	--	Glycosyl transferase family 41;; TPR repeat;; Tetratricopeptide repeat;; Tetratricopeptide repeat;; Tetratricopeptide repeat;; Tetratricopeptide repeat;; Tetratricopeptide repeat;; Tetratricopeptide repeat;; Tetratricopeptide repeat;; Tetratricopeptide repeat;; Tetratricopeptide repeat;; TPR repeat;; Tetratricopeptide repeat;; Tetratricopeptide repeat;; Tetratricopeptide repeat;; Tetratricopeptid…	Transmembrane and TPR repeat-containing protein 2 GN=tmtc2 OS=Xenopus laevis (African clawed frog) PE=2 SV=1	O-linked N-acetylglucosamine (GlcNAc) transferase [Xenopus (Silurana) tropicalis]
c115675.graph_c0	284	12.4395	86	3.55088	2.13e-06	-2.00461	down	--	--	Biological Process: telomere maintenance (GO:0000723);; Molecular Function: damaged DNA binding (GO:0003684);; Molecular Function: ATP-dependent DNA helicase activity (GO:0004003);; Biological Process: double-strand break repair via nonhomologous end joining (GO:0006303);; Biological Process: DNA recombination (GO:0006310);; Molecular Function: telomeric DNA binding (GO:0042162);; Cellular Compon…	K10885|0|cmy:102939818|XRCC5; X-ray repair complementing defective repair in Chinese hamster cells 5 (double-strand-break rejoining); K10885 ATP-dependent DNA helicase 2 subunit 2 (A)	[L]	Replication, recombination and repair	Ku70/Ku80 N-terminal alpha/beta domain;; Ku70/Ku80 beta-barrel domain;; Ku70/Ku80 C-terminal arm	--	PREDICTED: X-ray repair cross-complementing protein 5 [Chrysemys picta bellii]
c114565.graph_c0	46	3.02563	13	0.806033	0.00378167	-2.00491	down	--	--	--	K01205|1.6171e-89|acs:100556397|naglu; N-acetylglucosaminidase, alpha; K01205 alpha-N-acetylglucosaminidase [EC:3.2.1.50] (A)	[U]	Intracellular trafficking, secretion, and vesicular transport	Alpha-N-acetylglucosaminidase (NAGLU) tim-barrel domain;; Alpha-N-acetylglucosaminidase (NAGLU) N-terminal domain	--	PREDICTED: LOW QUALITY PROTEIN: alpha-N-acetylglucosaminidase [Anolis carolinensis]
c115470.graph_c0	118	3.209	35	0.897236	4.74e-05	-2.00801	down	[M]	Cell wall/membrane/envelope biogenesis	Molecular Function: GTPase activity (GO:0003924);; Molecular Function: GTP binding (GO:0005525);; Biological Process: GTP catabolic process (GO:0006184);;	--	[J]	Translation, ribosomal structure and biogenesis	Elongation factor Tu GTP binding domain;; GTP-binding protein LepA C-terminus;; Elongation factor G C-terminus;; Ras family;; 50S ribosome-binding GTPase;; Elongation factor Tu domain 2;; Signal recognition particle receptor beta subunit	Elongation factor 2 GN=EEF2 OS=Gallus gallus (Chicken) PE=1 SV=3	PREDICTED: translation factor GUF1, mitochondrial isoform X1 [Xenopus (Silurana) tropicalis]
c116924.graph_c2	177	9.42622	53	2.66067	9.12e-06	-2.00942	down	--	--	--	--	[S]	Function unknown	Tetratricopeptide repeat	Tetratricopeptide repeat protein 38 GN=ttc38 OS=Xenopus laevis (African clawed frog) PE=2 SV=1	tetratricopeptide repeat protein 38 [Xenopus laevis]
c118121.graph_c0	236	10.9037	71	3.09222	3.39e-06	-2.01013	down	[Q]	Secondary metabolites biosynthesis, transport and catabolism	--	--	[H]	Coenzyme transport and metabolism	Flavin containing amine oxidoreductase	--	pyridine nucleotide-disulphide oxidoreductase domain 2 [Xenopus laevis]
c114767.graph_c0	115	7.42152	34	2.06836	5.13e-05	-2.01135	down	--	--	Molecular Function: DNA binding (GO:0003677);; Molecular Function: RNA binding (GO:0003723);; Cellular Component: nucleus (GO:0005634);; Cellular Component: cytoplasm (GO:0005737);; Biological Process: regulation of translation (GO:0006417);; Biological Process: RNA metabolic process (GO:0016070);;	--	[J]	Translation, ribosomal structure and biogenesis	MIF4G domain	MIF4G domain-containing protein GN=mif4gd OS=Xenopus tropicalis (Western clawed frog) PE=2 SV=1	MIF4G domain-containing protein [Xenopus (Silurana) tropicalis]
c115993.graph_c0	66	8.0445	19	2.18303	0.00065187	-2.01425	down	--	--	--	--	--	--	--	--	PREDICTED: uncharacterized protein LOC100498087 [Xenopus (Silurana) tropicalis]
c118009.graph_c0	73	2.51522	21	0.682061	0.000377052	-2.02274	down	--	--	Molecular Function: G-protein coupled receptor activity (GO:0004930);; Biological Process: G-protein coupled receptor signaling pathway (GO:0007186);; Cellular Component: integral component of membrane (GO:0016021);;	K08460|0|xtr:101734680|gpr123; G protein-coupled receptor 123; K08460 G protein-coupled receptor 123 (A)	[R]	General function prediction only	7 transmembrane receptor (Secretin family)	--	PREDICTED: probable G-protein coupled receptor 123 [Xenopus (Silurana) tropicalis]
c71606.graph_c0	2530	46.194	765	13.1667	2.12e-07	-2.02307	down	[E]	Amino acid transport and metabolism	Molecular Function: aminomethyltransferase activity (GO:0004047);; Cellular Component: cytoplasm (GO:0005737);; Biological Process: glycine catabolic process (GO:0006546);; Molecular Function: oxidoreductase activity (GO:0016491);; Biological Process: oxidation-reduction process (GO:0055114);;	K00315|0|xtr:100492188|dmgdh; dimethylglycine dehydrogenase; K00315 dimethylglycine dehydrogenase [EC:1.5.8.4] (A)	[E]	Amino acid transport and metabolism	FAD dependent oxidoreductase;; Aminomethyltransferase folate-binding domain;; Glycine cleavage T-protein C-terminal barrel domain;; Sarcosine oxidase, gamma subunit family;; Pyridine nucleotide-disulphide oxidoreductase;; NAD(P)-binding Rossmann-like domain;; FAD binding domain;; FAD binding domain	Aminomethyltransferase, mitochondrial (Precursor) GN=AMT OS=Gallus gallus (Chicken) PE=2 SV=2	PREDICTED: dimethylglycine dehydrogenase, mitochondrial isoform X1 [Xenopus (Silurana) tropicalis]
c107558.graph_c0	235	12.9686	70	3.64146	2.85e-06	-2.02408	down	[I]	Lipid transport and metabolism	--	--	[I]	Lipid transport and metabolism	Enoyl-CoA hydratase/isomerase family	Enoyl-CoA hydratase domain-containing protein 3, mitochondrial (Precursor) GN=echdc3 OS=Danio rerio (Zebrafish) PE=2 SV=2	LOC100036886 protein [Xenopus laevis]
c109940.graph_c0	83	5.15137	24	1.40413	0.000201825	-2.02437	down	--	--	Cellular Component: integral component of membrane (GO:0016021);; Biological Process: transmembrane transport (GO:0055085);;	K12307|2.29809e-138|xtr:733858|uncharacterized LOC733858; K12307 MFS transporter, ceroid-lipofuscinosis neuronal protein 7 (A)	--	--	Major Facilitator Superfamily	--	novel protein [Xenopus (Silurana) tropicalis]
c52254.graph_c0	60	4.20671	17	1.12355	0.000931596	-2.02762	down	--	--	--	--	--	--	--	--	unnamed protein product [Oncorhynchus mykiss]
c117345.graph_c1	60	3.08613	17	0.824258	0.000931596	-2.02762	down	--	--	--	K16617|3.74104e-25|xtr:100498211|collagen alpha-1(XIII) chain-like; K16617 collagen, type XIII, alpha (A)	[W]	Extracellular structures	Collagen triple helix repeat (20 copies)	--	PREDICTED: collagen alpha-1(XIII) chain-like isoform X7 [Xenopus (Silurana) tropicalis]
c107254.graph_c0	90	2.88828	26	0.786542	0.000130331	-2.03054	down	[RTKL]	--	Biological Process: lymphangiogenesis (GO:0001946);; Molecular Function: non-membrane spanning protein tyrosine kinase activity (GO:0004715);; Molecular Function: ATP binding (GO:0005524);; Cellular Component: cytoplasm (GO:0005737);; Biological Process: protein phosphorylation (GO:0006468);; Biological Process: intracellular signal transduction (GO:0035556);; Biological Process: positive regulat…	K07360|0|xtr:448557|zap70; zeta-chain (TCR) associated protein kinase 70kDa; K07360 tyrosine-protein kinase ZAP-70 [EC:2.7.10.2] (A)	--	--	Protein tyrosine kinase;; Protein kinase domain;; SH2 domain	Tyrosine-protein kinase SYK GN=SYK OS=Gallus gallus (Chicken) PE=1 SV=2	zeta-chain (TCR) associated protein kinase 70kDa [Xenopus (Silurana) tropicalis]
c103776.graph_c0	203	8.64096	60	2.40751	4.22e-06	-2.0315	down	--	--	Molecular Function: motor activity (GO:0003774);; Molecular Function: actin binding (GO:0003779);; Molecular Function: ATP binding (GO:0005524);; Cellular Component: myosin complex (GO:0016459);;	K17751|0|xtr:100486122|myh7b; myosin, heavy chain 7B, cardiac muscle, beta; K17751 myosin heavy chain 6/7 (A)	[Z]	Cytoskeleton	Myosin tail	Myosin-3 GN=MYH3 OS=Gallus gallus (Chicken) PE=2 SV=3	PREDICTED: myosin-7B [Xenopus (Silurana) tropicalis]
c110558.graph_c0	37	1.946	10	0.495785	0.0085861	-2.0348	down	--	--	--	K18169|1.73219e-112|cmy:102936349|TTC19; tetratricopeptide repeat domain 19; K18169 tetratricopeptide repeat protein 19, mitochondrial (A)	[Z]	Cytoskeleton	Tetratricopeptide repeat;; TPR repeat;; Tetratricopeptide repeat;; Tetratricopeptide repeat;; Tetratricopeptide repeat;; Tetratricopeptide repeat;; Tetratricopeptide repeat;; Tetratricopeptide repeat;; Tetratricopeptide repeat;; Anaphase-promoting complex, cyclosome, subunit 3;; Tetratricopeptide repeat	Tetratricopeptide repeat protein 19, mitochondrial (Precursor) GN=ttc19 OS=Danio rerio (Zebrafish) PE=2 SV=2	PREDICTED: tetratricopeptide repeat protein 19, mitochondrial isoform X1 [Chrysemys picta bellii]
c90860.graph_c0	67	1.75144	19	0.468195	0.000515231	-2.03556	down	[R]	General function prediction only	Biological Process: protein localization (GO:0008104);; Biological Process: convergent extension (GO:0060026);; Biological Process: retina morphogenesis in camera-type eye (GO:0060042);; Biological Process: cilium morphogenesis (GO:0060271);;	--	[R]	General function prediction only	WD domain, G-beta repeat	F-box-like/WD repeat-containing protein TBL1XR1-A GN=tbl1xr1-a OS=Xenopus laevis (African clawed frog) PE=1 SV=1	intraflagellar transport 80 [Xenopus (Silurana) tropicalis]
c116298.graph_c0	860	47.0647	257	13.2581	2.01e-07	-2.03589	down	[G]	Carbohydrate transport and metabolism	Molecular Function: gluconolactonase activity (GO:0004341);; Molecular Function: calcium ion binding (GO:0005509);; Cellular Component: nucleus (GO:0005634);; Cellular Component: cytoplasm (GO:0005737);; Biological Process: cellular calcium ion homeostasis (GO:0006874);; Molecular Function: zinc ion binding (GO:0008270);; Biological Process: L-ascorbic acid biosynthetic process (GO:0019853);; Mol…	K01053|0|xla:373659|rgn, GNL, rgn-A, smp30, xsmp30; regucalcin (EC:3.1.1.17); K01053 gluconolactonase [EC:3.1.1.17] (A)	[PT]	--	SMP-30/Gluconolaconase/LRE-like region	Regucalcin OS=Xenopus laevis (African clawed frog) PE=2 SV=1	regucalcin [Xenopus laevis]
[truncated: 656 more rows]

## Sheet: AM-vs-TM DEG
#ID	AM_count	AM_FPKM	TM_count	TM_FPKM	FDR	log2FC	regulated
c100058.graph_c0	4	0.218152	30	1.95966	0.00363594	2.56981	up
c100129.graph_c0	226	23.92	50	6.33847	1.69561e-06	-2.0438	down
c100487.graph_c0	37	3.00163	5	0.485833	0.0031111	-2.45699	down
c100504.graph_c0	7	0.430186	39	2.87068	0.00225109	2.32102	up
c100598.graph_c0	45	2.81665	6	0.449814	0.000620268	-2.52408	down
c100636.graph_c0	155	9.78628	0	0	0	-6.53084	down
c100640.graph_c0	79	5.59321	4	0.3392	1.74826e-09	-3.75503	down
c100685.graph_c0	60	7.75231	8	1.23803	5.15353e-05	-2.58826	down
c100690.graph_c0	28	1.49765	2	0.128128	0.00279197	-2.95264	down
[truncated: 706 more rows]

## Sheet: AM-vs-TM annotation
#ID	AM_count	AM_FPKM	TM_count	TM_FPKM	FDR	log2FC	regulated	COG_class	COG_class_annotation	GO_annotation	KEGG_annotation	KOG_class	KOG_class_annotation	Pfam_annotation	Swissprot_annotation	nr_annotation
[truncated: 342 more rows]

[truncated: 2 more sheets: TF-vs-TM DEG, TF-vs-TM annotation]
