# Supplementary material for: Modulation of Gene Expression in Liver of Hibernating Asiatic Toads (Bufo gargarizans)
Source: Int J Mol Sci. 2018 Aug 10;19(8):2363. doi: 10.3390/ijms19082363 (PMC6121651; doi:10.3390/ijms19082363)
Supplement: Supplementary file 1 [file ijms-19-02363-s001.zip › ╓╨╗¬≤╕≥▄╫¬┬╝╫Θ╬─╒┬╨▐╕─░μ/Table S2.xls]

## Sheet: Sheet1
#ID	regulated	regulated	AF-vs-TF Log2FC	AM-vs-TM Log2FC	nr_annotation
c44660.graph_c0	down	down	-6.44428	-4.13116	cytochrome P450, family 17, subfamily A, polypeptide 1 [Glandirana rugosa]
c106943.graph_c0	down	down	-6.10406	-4.03057
c78648.graph_c0	down	down	-6.10212	-3.16158
c96956.graph_c0	down	down	-5.76784	-4.68842
c81220.graph_c0	down	down	-5.63482	-5.70981	PREDICTED: heat shock protein HSP 90-beta [Callorhinchus milii]
c117678.graph_c3	down	down	-5.6227	-2.54684	PREDICTED: cytochrome P450 2C20-like [Xenopus (Silurana) tropicalis]
c114744.graph_c1	down	down	-5.60361	-2.17988
c106358.graph_c0	down	down	-5.57897	-3.60406
c99835.graph_c0	down	down	-5.55108	-4.81479
c65234.graph_c0	up	up	5.53901	4.14667
c101868.graph_c0	down	down	-5.18891	-3.40058
c59443.graph_c0	up	up	5.12729	5.45803
c20393.graph_c0	down	down	-5.12681	-4.03057	lysosomal acid phosphatase precursor [Xenopus laevis]
c108847.graph_c0	down	down	-5.03015	-3.89626
c85444.graph_c0	down	down	-5.00916	-5.51878	tyrosine aminotransferase [Danio rerio]
c73802.graph_c0	down	down	-4.99648	-4.81479
c86933.graph_c1	down	down	-4.94516	-2.69015	hypothetical protein [Callorhinchus milii]
c121452.graph_c1	up	up	4.88359	4.63595
c42165.graph_c0	down	down	-4.74995	-3.6783	70kD heat shock protein, partial [Takifugu rubripes]
c122936.graph_c0	up	up	4.70419	4.11395
c111752.graph_c0	down	down	-4.6672	-5.11434	PREDICTED: long-chain-fatty-acid--CoA ligase ACSBG1 isoform X1 [Struthio camelus australis]
c119368.graph_c0	up	up	4.66496	5.02683	PREDICTED: zinc finger BED domain-containing protein 1-like isoform X1 [Stegastes partitus]
c86222.graph_c0	up	up	4.66245	2.7939	PREDICTED: solute carrier family 23 member 2-like [Xenopus (Silurana) tropicalis]
c80857.graph_c0	down	down	-4.64428	-4.68842	PREDICTED: uncharacterized protein LOC102222694 [Xiphophorus maculatus]
c76918.graph_c0	down	down	-4.61614	-3.71882
c110534.graph_c0	down	down	-4.53656	-2.07239	PREDICTED: uncharacterized protein LOC101730528 [Xenopus (Silurana) tropicalis]
c99486.graph_c0	up	up	4.50646	4.43863	PREDICTED: serine/threonine-protein kinase DCLK3 [Xenopus (Silurana) tropicalis]
c111488.graph_c0	down	down	-4.49943	-4.37348
c19443.graph_c0	down	down	-4.45242	-4.35567
c115272.graph_c0	down	down	-4.40888	-4.87405	PREDICTED: L-threonine 3-dehydrogenase, mitochondrial-like [Stegastes partitus]
c107170.graph_c0	down	down	-4.36637	-3.05987	LINE-1 reverse transcriptase homolog [Rana catesbeiana]
c118239.graph_c0	up	up	4.33266	2.99862
c101656.graph_c0	down	down	-4.29035	-2.74189	PREDICTED: vomeronasal type-2 receptor 26-like [Xenopus (Silurana) tropicalis]
c106974.graph_c0	up	up	4.27298	2.6183	follistatin [Xenopus laevis]
c120698.graph_c0	up	up	4.25093	5.2745
c119057.graph_c2	up	up	4.21137	5.42208
c105714.graph_c0	up	up	4.10351	4.01448	PREDICTED: blood vessel epicardial substance isoform X2 [Corvus cornix cornix]
c25694.graph_c0	down	down	-4.05907	-3.4284	uncharacterized protein LOC432082 [Xenopus laevis]
c96109.graph_c0	up	up	4.05465	3.10007
c87511.graph_c0	down	down	-4.0169	-2.16613	PREDICTED: vitellogenin-A2-like [Xenopus (Silurana) tropicalis]
c109010.graph_c0	down	down	-3.97628	-3.60305
c122981.graph_c0	down	down	-3.97315	-6.99625
c106746.graph_c0	down	down	-3.95994	-2.8391	PREDICTED: glycine N-acyltransferase-like protein 3 [Nipponia nippon]
c115130.graph_c0	down	down	-3.92099	-2.17686	thyrotropin-releasing hormone receptor 2 [Xenopus laevis]
c120840.graph_c0	down	down	-3.84516	-3.09912
c89942.graph_c0	down	down	-3.84516	-4.35567
c26374.graph_c0	down	down	-3.8443	-4.47532	PREDICTED: heat shock 70 kDa protein 1 [Cynoglossus semilaevis]
c119187.graph_c0	down	down	-3.83251	-3.69848
c90911.graph_c0	up	up	3.79718	4.93975
c107811.graph_c1	down	down	-3.77434	-2.30633
c106938.graph_c0	down	down	-3.75892	-2.36083
c77846.graph_c0	down	down	-3.72061	-2.87487
c103050.graph_c0	down	down	-3.68697	-2.29596
c70612.graph_c0	down	down	-3.63192	-4.81032	PREDICTED: uncharacterized protein LOC101731022 [Xenopus (Silurana) tropicalis]
c114571.graph_c0	up	up	3.63011	2.89337
c117053.graph_c0	up	up	3.63011	3.23896
c85945.graph_c0	down	down	-3.62862	-5.16253	PREDICTED: tubulin alpha-1A chain-like [Latimeria chalumnae]
c98668.graph_c0	up	up	3.6193	3.3249
c122407.graph_c0	down	down	-3.61786	-2.74853	PREDICTED: bile salt export pump-like [Xenopus (Silurana) tropicalis]
c90064.graph_c0	down	down	-3.61243	-4.39667	PREDICTED: solute carrier family 2, facilitated glucose transporter member 1, partial [Pterocles gutturalis]
c106890.graph_c0	down	down	-3.60744	-2.87001
c111405.graph_c0	down	down	-3.59396	-2.71672	dak protein [Xenopus (Silurana) tropicalis]
c121078.graph_c0	down	down	-3.57423	-2.51637	TPA: TPA_exp: polyprotein [Danio rerio]
c84684.graph_c0	down	down	-3.51234	-2.55749
c103751.graph_c0	down	down	-3.48655	-2.87762	iodotyrosine deiodinase [Xenopus laevis]
c103334.graph_c0	down	down	-3.46682	-3.80552	PREDICTED: uncharacterized protein LOC101732761 [Xenopus (Silurana) tropicalis]
c70759.graph_c0	down	down	-3.39924	-3.13495	PREDICTED: histone H2A-like [Takifugu rubripes]
c97991.graph_c0	down	down	-3.39924	-4.08174
c25282.graph_c0	up	up	3.39801	2.76754
c111065.graph_c0	down	down	-3.39379	-2.65055
c115109.graph_c0	down	down	-3.39379	-2.6453
c26548.graph_c0	up	up	3.38451	2.47304	LOC100127732 protein [Xenopus (Silurana) tropicalis]
c118658.graph_c0	down	down	-3.37971	-2.76878
c122753.graph_c0	up	up	3.33311	3.76256
c109310.graph_c0	down	down	-3.3162	-2.49109
c112676.graph_c0	down	down	-3.31317	-3.73013
c122831.graph_c0	up	up	3.30686	3.55328
c115968.graph_c0	down	down	-3.26886	-4.17895
c117154.graph_c3	down	down	-3.26389	-2.95312	PREDICTED: amine sulfotransferase-like [Tyto alba]
c112303.graph_c0	up	up	3.26053	2.2905	Y box binding protein 2 [Xenopus (Silurana) tropicalis]
c117572.graph_c0	up	up	3.25979	2.40381	PREDICTED: uncharacterized protein LOC101732449 [Xenopus (Silurana) tropicalis]
c106889.graph_c2	down	down	-3.25626	-4.01466
c29412.graph_c0	up	up	3.25169	2.80198	unnamed protein product [Oncorhynchus mykiss]
c119737.graph_c0	up	up	3.24834	2.07659	PREDICTED: glutamine synthetase [Nestor notabilis]
c96988.graph_c0	up	up	3.21431	2.32254	Xgs protein [Xenopus laevis]
c99518.graph_c0	down	down	-3.21391	-2.41299
c105678.graph_c0	down	down	-3.21358	-2.44705	MID1 interacting protein 1 [Xenopus (Silurana) tropicalis]
c119944.graph_c0	up	up	3.2041	2.0361	PREDICTED: uncharacterized protein LOC101732120 [Xenopus (Silurana) tropicalis]
c100598.graph_c0	down	down	-3.17908	-2.52408
c116872.graph_c0	up	up	3.1783	3.0996
c123056.graph_c0	up	up	3.1783	3.76919
c112082.graph_c0	down	down	-3.17803	-3.31178	uncharacterized protein LOC734688 precursor [Xenopus laevis]
c51278.graph_c0	down	down	-3.14754	-3.15145	LOC100101335 protein [Xenopus laevis]
c116798.graph_c0	up	up	3.12366	2.05011	PREDICTED: uncharacterized protein LOC100490320 [Xenopus (Silurana) tropicalis]
c118421.graph_c0	down	down	-3.11408	-3.58101	dimethylaniline monooxygenase [N-oxide-forming] 4 [Xenopus (Silurana) tropicalis]
c115096.graph_c1	up	up	3.10608	3.50534	secreted frizzled-related protein 2 precursor [Xenopus (Silurana) tropicalis]
c115888.graph_c1	up	up	3.09102	2.12294
c115482.graph_c0	up	up	3.08883	2.99862
c103315.graph_c0	down	down	-3.06441	-2.2189
c96318.graph_c0	down	down	-3.05418	-2.82844	uncharacterized protein LOC734667 precursor [Xenopus laevis]
c79356.graph_c0	down	down	-3.03804	-2.40951
c106507.graph_c0	down	down	-3.03756	-2.87869	PREDICTED: uncharacterized protein LOC103278027 [Anolis carolinensis]
c104131.graph_c0	up	up	3.0325	2.8325
c84982.graph_c0	down	down	-3.02509	-3.62888	PREDICTED: uncharacterized protein LOC103376870 [Cynoglossus semilaevis]
c116091.graph_c0	down	down	-3.02112	-2.3049	PREDICTED: probable RNA-binding protein 23 isoform X2 [Xenopus (Silurana) tropicalis]
c94324.graph_c0	down	down	-3.01455	-4.07447	PREDICTED: uncharacterized protein LOC101735191 [Xenopus (Silurana) tropicalis]
c90325.graph_c0	down	down	-3.00615	-3.3404	DNA fragmentation factor, 40kDa, beta polypeptide (caspase-activated DNase) [Xenopus (Silurana) tropicalis]
c109455.graph_c1	down	down	-2.98467	-2.52969
c122690.graph_c0	up	up	2.96456	2.3803	TPA: TPA_inf: HN1 protein [Xenopus laevis]
c108659.graph_c0	up	up	2.95931	2.10841	PREDICTED: uncharacterized protein LOC101735087 [Xenopus (Silurana) tropicalis]
c65584.graph_c0	up	up	2.92244	2.00864
c119588.graph_c1	up	up	2.92198	2.39042	PREDICTED: LINE-1 type transposase domain-containing protein 1-like [Xenopus (Silurana) tropicalis]
c120360.graph_c0	down	down	-2.90691	-2.07861	PREDICTED: beta,beta-carotene 15,15&apos;-monooxygenase [Xenopus (Silurana) tropicalis]
c99539.graph_c0	down	down	-2.90377	-2.02159
c116948.graph_c0	up	up	2.86519	2.60626	PREDICTED: uncharacterized protein LOC103282659 [Anolis carolinensis]
c117320.graph_c0	up	up	2.8612	2.54843	tumor necrosis factor receptor superfamily, member 11b precursor [Xenopus laevis]
c120937.graph_c1	down	down	-2.84215	-2.96331	unnamed protein product [Oncorhynchus mykiss]
c120450.graph_c0	down	down	-2.83462	-2.4717	PREDICTED: acyl-CoA dehydrogenase family member 10 isoform X2 [Xenopus (Silurana) tropicalis]
c120398.graph_c0	down	down	-2.82352	-3.30148	PREDICTED: cytochrome P450 2K1-like isoform X2 [Xenopus (Silurana) tropicalis]
c116964.graph_c0	down	down	-2.80531	-2.6453
c119577.graph_c0	down	down	-2.80012	-2.04979	protein-L-isoaspartate (D-aspartate) O-methyltransferase 1 [Xenopus laevis]
c116269.graph_c0	up	up	2.76492	2.39605	PREDICTED: uncharacterized protein LOC103280586 [Anolis carolinensis]
c118144.graph_c0	up	up	2.76241	2.42133	PREDICTED: ectonucleotide pyrophosphatase/phosphodiesterase family member 6 isoform X1 [Chrysemys picta bellii]
c123286.graph_c0	down	down	-2.7612	-2.07245	PREDICTED: beta-1,3-galactosyltransferase 5-like [Xenopus (Silurana) tropicalis]
c115534.graph_c0	down	down	-2.75465	-2.70275
c118498.graph_c0	down	down	-2.73893	-3.27436	uncharacterized protein LOC394486 [Xenopus (Silurana) tropicalis]
c96299.graph_c0	down	down	-2.72509	-2.13131	PREDICTED: uncharacterized protein LOC100496891 [Xenopus (Silurana) tropicalis]
c119431.graph_c0	down	down	-2.72445	-2.07541
c120949.graph_c0	up	up	2.72105	2.55402	PREDICTED: alpha-protein kinase 3-like isoform X1 [Xenopus (Silurana) tropicalis]
c117386.graph_c1	up	up	2.71818	2.33959
c111373.graph_c0	up	up	2.69697	5.37974
c114592.graph_c0	up	up	2.69615	2.32102
c115760.graph_c0	up	up	2.69454	2.02701	Fn14 protein [Xenopus laevis]
c77043.graph_c0	down	down	-2.67426	-2.77983
c112062.graph_c0	down	down	-2.66476	-2.54689
c112079.graph_c0	down	down	-2.66476	-3.33457	PREDICTED: uncharacterized protein LOC101733475 [Xenopus (Silurana) tropicalis]
c102587.graph_c0	up	up	2.65692	2.12561	unnamed protein product [Oncorhynchus mykiss]
c108506.graph_c0	down	down	-2.64665	-2.03381	PREDICTED: uncharacterized protein LOC100487960 isoform X1 [Xenopus (Silurana) tropicalis]
c113224.graph_c0	up	up	2.64455	2.62342
c110357.graph_c0	down	down	-2.64229	-2.33698	Hic-5 [Xenopus laevis]
c109618.graph_c0	down	down	-2.62742	-3.17181
c112887.graph_c0	up	up	2.62567	2.75687	Small transmembrane and glycosylated protein homolog [Rana catesbeiana]
c25790.graph_c0	up	up	2.62272	2.10779	12-RF amide peptide [Rana catesbeiana]
c120701.graph_c1	up	up	2.62059	2.42438	LOC100145111 protein [Xenopus (Silurana) tropicalis]
c115971.graph_c0	down	down	-2.61888	-2.25461
c119588.graph_c2	down	down	-2.61791	-2.47493	PREDICTED: LINE-1 type transposase domain-containing protein 1-like [Xenopus (Silurana) tropicalis]
c114187.graph_c2	down	down	-2.61579	-2.24136
c118208.graph_c0	down	down	-2.61579	-3.15901
c116494.graph_c0	down	down	-2.61266	-2.55749
c45955.graph_c0	down	down	-2.61266	-3.90887
c57757.graph_c0	down	down	-2.61266	-2.56471
c119124.graph_c0	down	down	-2.60315	-2.23352	PREDICTED: uncharacterized protein LOC103278027 [Anolis carolinensis]
c122435.graph_c1	down	down	-2.58905	-2.73799	reverse transcriptase, partial [Clarias batrachus]
c106153.graph_c0	down	down	-2.58784	-2.2055
c118792.graph_c0	up	up	2.5704	2.18776
c102234.graph_c0	down	down	-2.56508	-2.22697	alanine aminotransferase 2 [Xenopus (Silurana) tropicalis]
c95719.graph_c0	up	up	2.55393	3.67668
c87015.graph_c0	down	down	-2.54706	-2.14742	urate oxidase [Xenopus (Silurana) tropicalis]
c116455.graph_c2	down	down	-2.53956	-3.06124
c119105.graph_c1	up	up	2.53887	2.50998
c113094.graph_c0	down	down	-2.5353	-2.18188
c120840.graph_c1	down	down	-2.52026	-3.16615	PREDICTED: LOW QUALITY PROTEIN: secretory phospholipase A2 receptor [Chelonia mydas]
c118897.graph_c0	up	up	2.51023	3.16542
c122272.graph_c4	down	down	-2.49287	-2.89546	PREDICTED: glutathione S-transferase 3 [Chaetura pelagica]
c117397.graph_c1	up	up	2.47527	2.01018
c108114.graph_c0	down	down	-2.47292	-2.09863
c116758.graph_c1	down	down	-2.47292	-3.65245
c119779.graph_c0	up	up	2.47152	2.61478	PREDICTED: pogo transposable element with KRAB domain-like [Latimeria chalumnae]
c57694.graph_c0	down	down	-2.46163	-2.28236	histone H1.0 [Xenopus (Silurana) tropicalis]
c113854.graph_c0	down	down	-2.4574	-2.33313	unnamed protein product [Oncorhynchus mykiss]
c120173.graph_c0	down	down	-2.45331	-2.93001	PREDICTED: vitamin D3 hydroxylase-associated protein-like [Anolis carolinensis]
c120399.graph_c0	down	down	-2.44691	-2.32407	PREDICTED: D-beta-hydroxybutyrate dehydrogenase, mitochondrial-like isoform X1 [Xenopus (Silurana) tropicalis]
c122333.graph_c0	up	up	2.4412	4.181	heat shock protein 70 [Pelophylax lessonae]
c99009.graph_c0	down	down	-2.43194	-2.19556	PREDICTED: mitochondrial 10-formyltetrahydrofolate dehydrogenase [Xenopus (Silurana) tropicalis]
c119819.graph_c1	down	down	-2.41955	-2.59579	PREDICTED: uncharacterized protein LOC101730500 [Xenopus (Silurana) tropicalis]
c105397.graph_c0	down	down	-2.41046	-2.34142
c113014.graph_c0	down	down	-2.40914	-2.21617	transposase-like [Salmo salar]
c75072.graph_c0	up	up	2.39839	2.23515
c99458.graph_c0	down	down	-2.38479	-2.35039	PREDICTED: biotinidase [Xenopus (Silurana) tropicalis]
c122724.graph_c0	up	up	2.37818	2.01658	Sulfotransferase 6B1 [Rana catesbeiana]
c116223.graph_c2	up	up	2.36946	2.11097	B-cell translocation gene 1, anti-proliferative [Xenopus (Silurana) tropicalis]
c118944.graph_c0	up	up	2.36158	2.95719
c119364.graph_c1	down	down	-2.35772	-2.60907
c121455.graph_c0	down	down	-2.35045	-2.7634
c119320.graph_c0	down	down	-2.34897	-2.66128	PREDICTED: cytochrome P450 2D15-like [Pelodiscus sinensis]
c114595.graph_c0	down	down	-2.34385	-4.98054
c121944.graph_c0	down	down	-2.33291	-3.60959	PREDICTED: uncharacterized protein LOC100490320 [Xenopus (Silurana) tropicalis]
c115829.graph_c0	down	down	-2.33174	-2.56986	PREDICTED: cytochrome P450 2W1-like [Chrysemys picta bellii]
c114739.graph_c0	down	down	-2.32688	-2.0624	PREDICTED: uncharacterized protein LOC100485159 isoform X1 [Xenopus (Silurana) tropicalis]
c121732.graph_c0	down	down	-2.32507	-2.02989	PREDICTED: para-nitrobenzyl esterase-like [Xenopus (Silurana) tropicalis]
c116794.graph_c0	up	up	2.31883	3.06716	vestigial-like family member 2 [Xenopus (Silurana) tropicalis]
c107946.graph_c0	down	down	-2.27871	-2.49829	poly [ADP-ribose] polymerase 3 [Xenopus (Silurana) tropicalis]
c112132.graph_c0	down	down	-2.27329	-2.21307
c108678.graph_c0	down	down	-2.27288	-2.01383
c109995.graph_c0	down	down	-2.25671	-2.64747
c121990.graph_c1	down	down	-2.24972	-2.21809	PREDICTED: C3a anaphylatoxin chemotactic receptor-like [Xenopus (Silurana) tropicalis]
c113755.graph_c1	down	down	-2.24286	-2.14626	1,2-dihydroxy-3-keto-5-methylthiopentene dioxygenase [Xenopus (Silurana) tropicalis]
c110715.graph_c0	down	down	-2.23658	-2.69057
c83174.graph_c0	down	down	-2.23081	-2.3879
c114414.graph_c1	down	down	-2.19925	-2.77193
c115307.graph_c0	down	down	-2.19711	-2.17176	zinc finger BED-type containing 4 protein, partial [Ichthyophis bannanicus]
c115888.graph_c0	up	up	2.16827	2.11671
c116013.graph_c0	down	down	-2.15594	-2.09455	PREDICTED: carbonic anhydrase 2 [Pseudopodoces humilis]
c117445.graph_c0	down	down	-2.14885	-2.01867
c119569.graph_c0	up	up	2.14498	2.86307	poly(U)-specific endoribonuclease-D precursor [Xenopus laevis]
c118797.graph_c0	up	up	2.13359	2.55352	spondin 2, extracellular matrix protein [Xenopus laevis]
c110253.graph_c1	up	up	2.12439	2.12999	family with sequence similarity 118, member B [Xenopus (Silurana) tropicalis]
c58542.graph_c0	up	up	2.11789	2.46105	myxovirus influenza virus resistance 1 [Xenopus laevis]
c106951.graph_c0	up	up	2.10961	3.10007
c107261.graph_c0	down	down	-2.1082	-5.0385
c120087.graph_c3	down	down	-2.08842	-2.38287	PREDICTED: uncharacterized protein LOC101732574 [Xenopus (Silurana) tropicalis]
c113672.graph_c0	up	up	2.08515	3.19398	PREDICTED: IgGFc-binding protein-like [Xenopus (Silurana) tropicalis]
c103836.graph_c0	up	up	2.0801	2.44346	uncharacterized protein LOC733821 [Xenopus (Silurana) tropicalis]
c115112.graph_c0	up	up	2.0778	2.01324	PREDICTED: serine/threonine-protein kinase pim-3-like [Latimeria chalumnae]
c117642.graph_c1	down	down	-2.07731	-2.11865	MGC83632 protein [Xenopus laevis]
c120253.graph_c7	up	up	2.05761	2.7557
c97396.graph_c1	up	up	2.05751	2.32362	PREDICTED: placenta-specific gene 8 protein-like isoform X2 [Xenopus (Silurana) tropicalis]
c117839.graph_c0	down	down	-2.05047	-3.95543
c113645.graph_c0	down	down	-2.0396	-2.21845	PREDICTED: uncharacterized protein LOC100486734 isoform X1 [Xenopus (Silurana) tropicalis]
c116298.graph_c0	down	down	-2.03589	-2.2295	regucalcin [Xenopus laevis]
c99521.graph_c0	down	down	-2.03516	-2.04801
c110558.graph_c0	down	down	-2.0348	-2.56469	PREDICTED: tetratricopeptide repeat protein 19, mitochondrial isoform X1 [Chrysemys picta bellii]
c122877.graph_c0	up	up	2.03229	2.32744
c107254.graph_c0	down	down	-2.03054	-2.23172	zeta-chain (TCR) associated protein kinase 70kDa [Xenopus (Silurana) tropicalis]
c52254.graph_c0	down	down	-2.02762	-2.64019	unnamed protein product [Oncorhynchus mykiss]
c71606.graph_c0	down	down	-2.02307	-2.07729	PREDICTED: dimethylglycine dehydrogenase, mitochondrial isoform X1 [Xenopus (Silurana) tropicalis]
c115993.graph_c0	down	down	-2.01425	-2.34396	PREDICTED: uncharacterized protein LOC100498087 [Xenopus (Silurana) tropicalis]
c116924.graph_c2	down	down	-2.00942	-2.51637	tetratricopeptide repeat protein 38 [Xenopus laevis]
