# Supplementary figures and images for: Modulation of Gene Expression in Liver of Hibernating Asiatic Toads (Bufo gargarizans)
Source: MDPI journal article supplement (doi:10.3390/ijms19082363), 2018-08-10

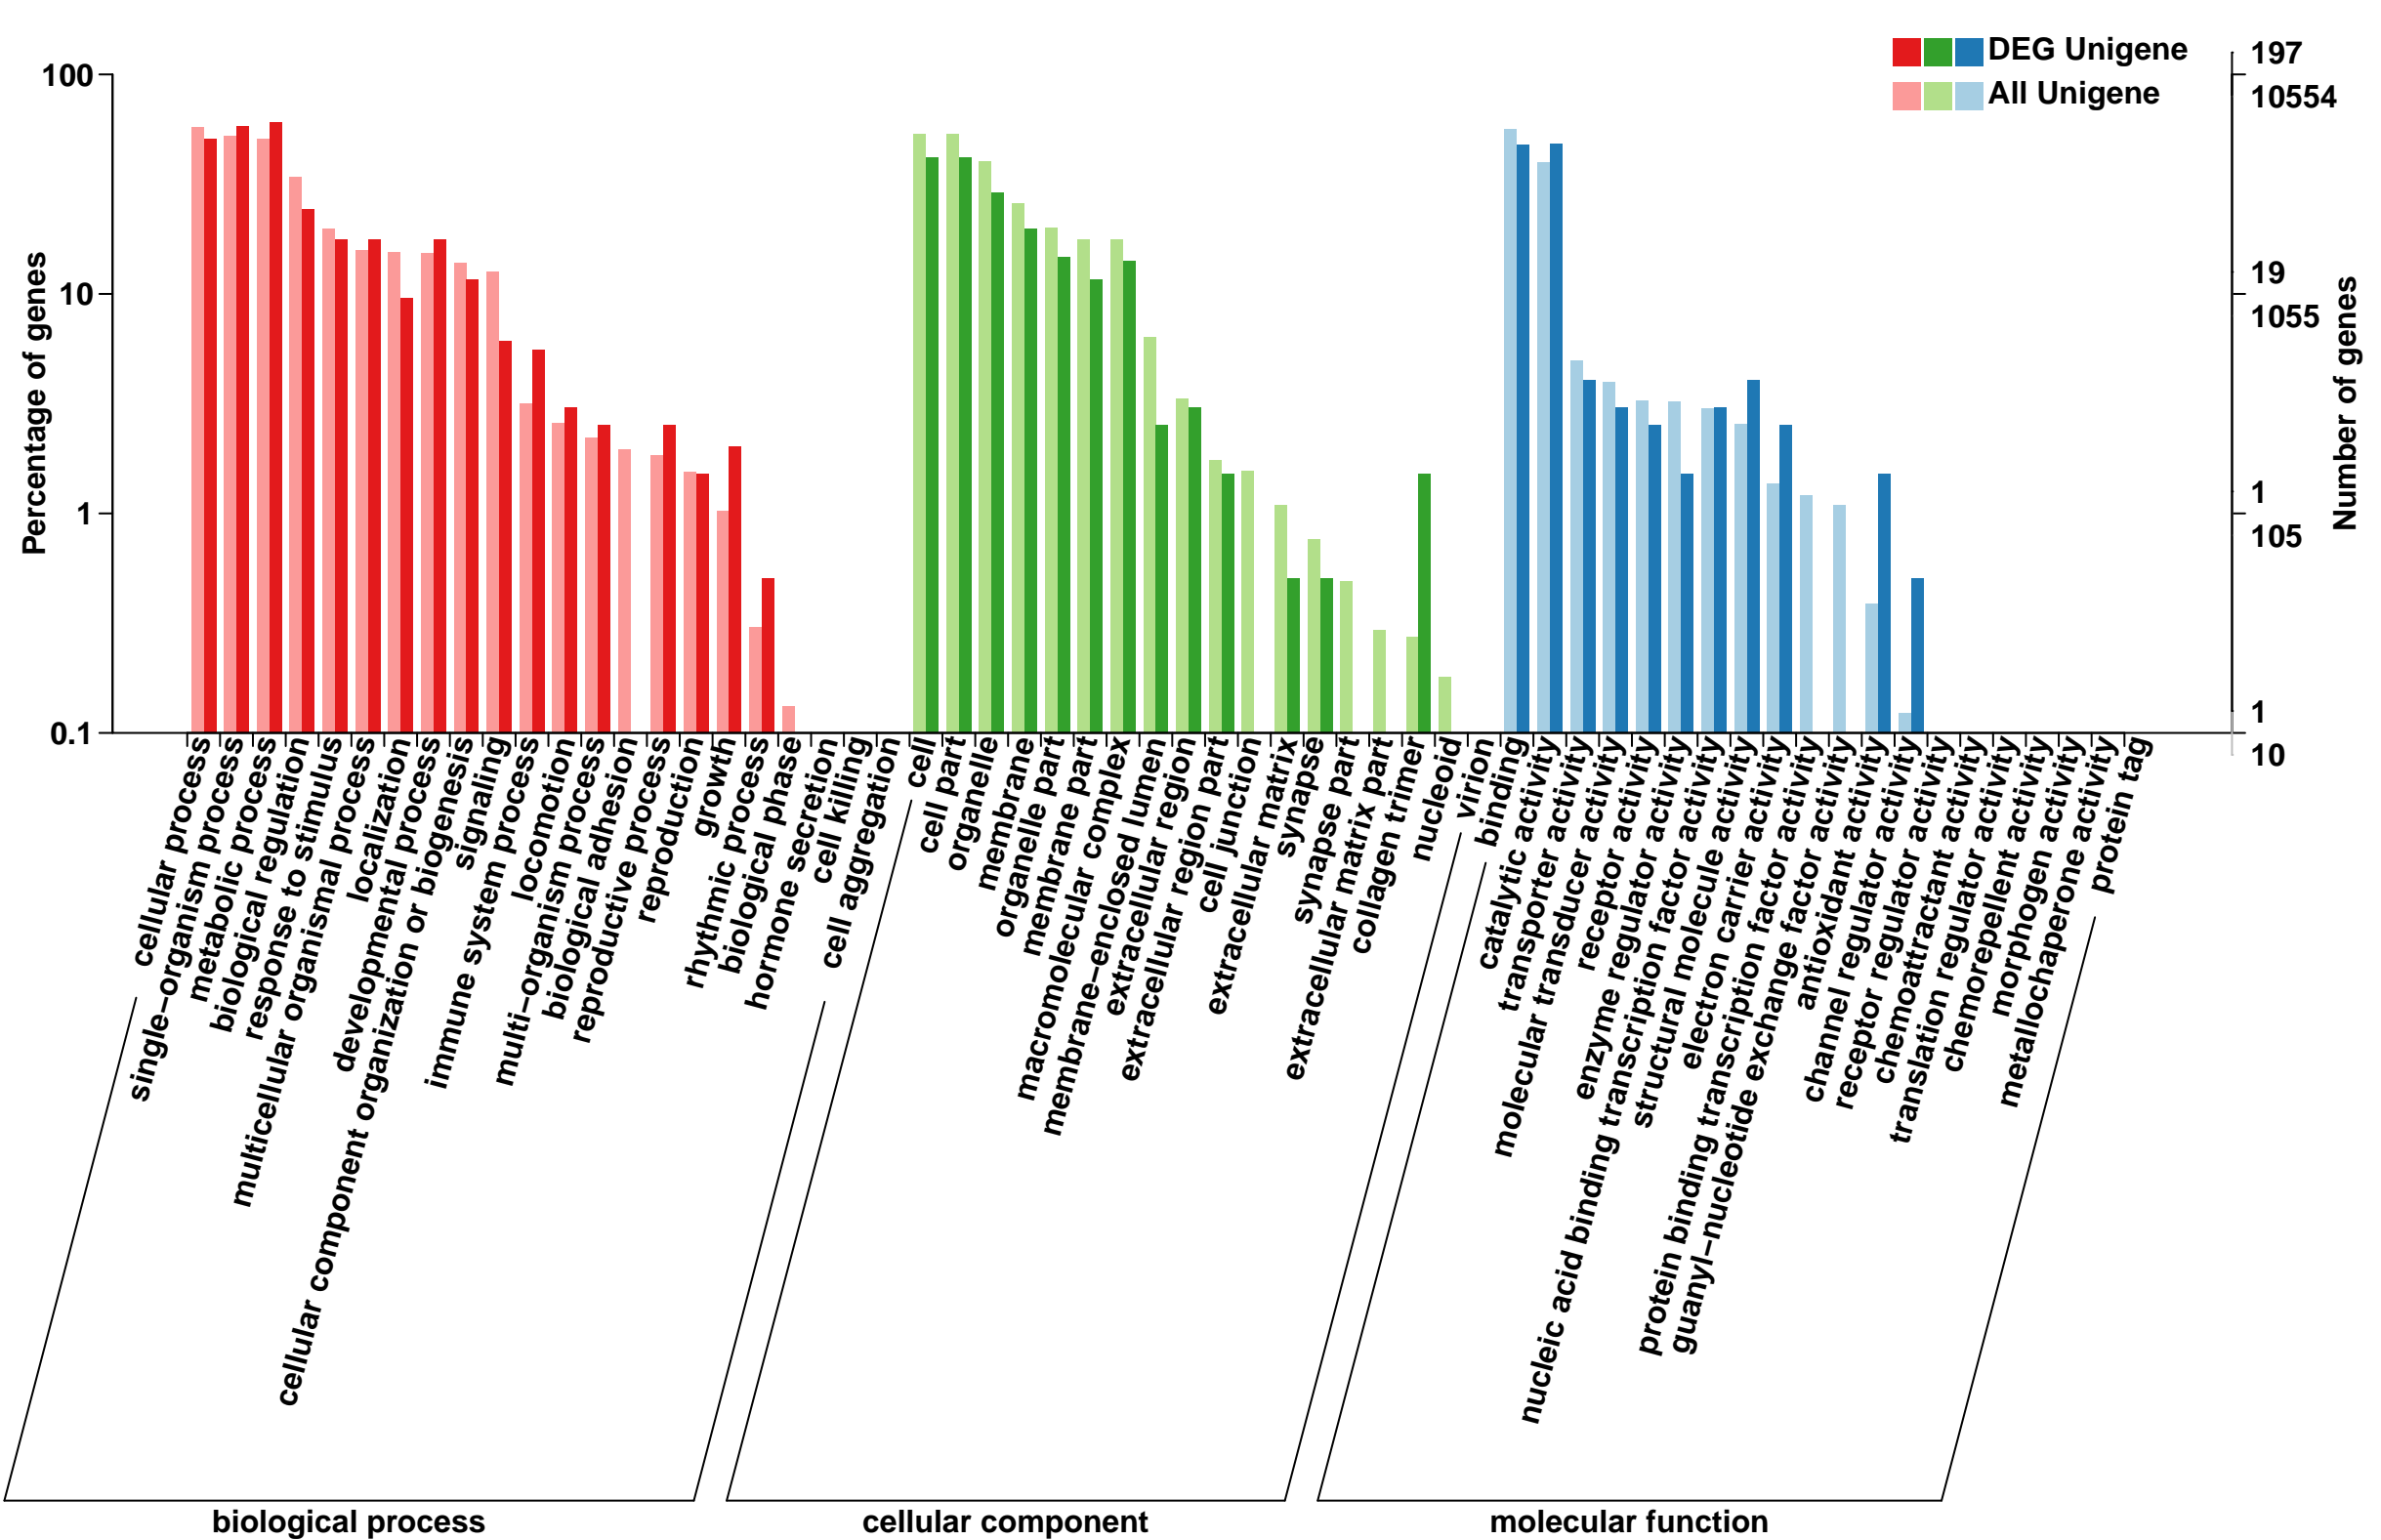

Supplement: s1 [file s1]

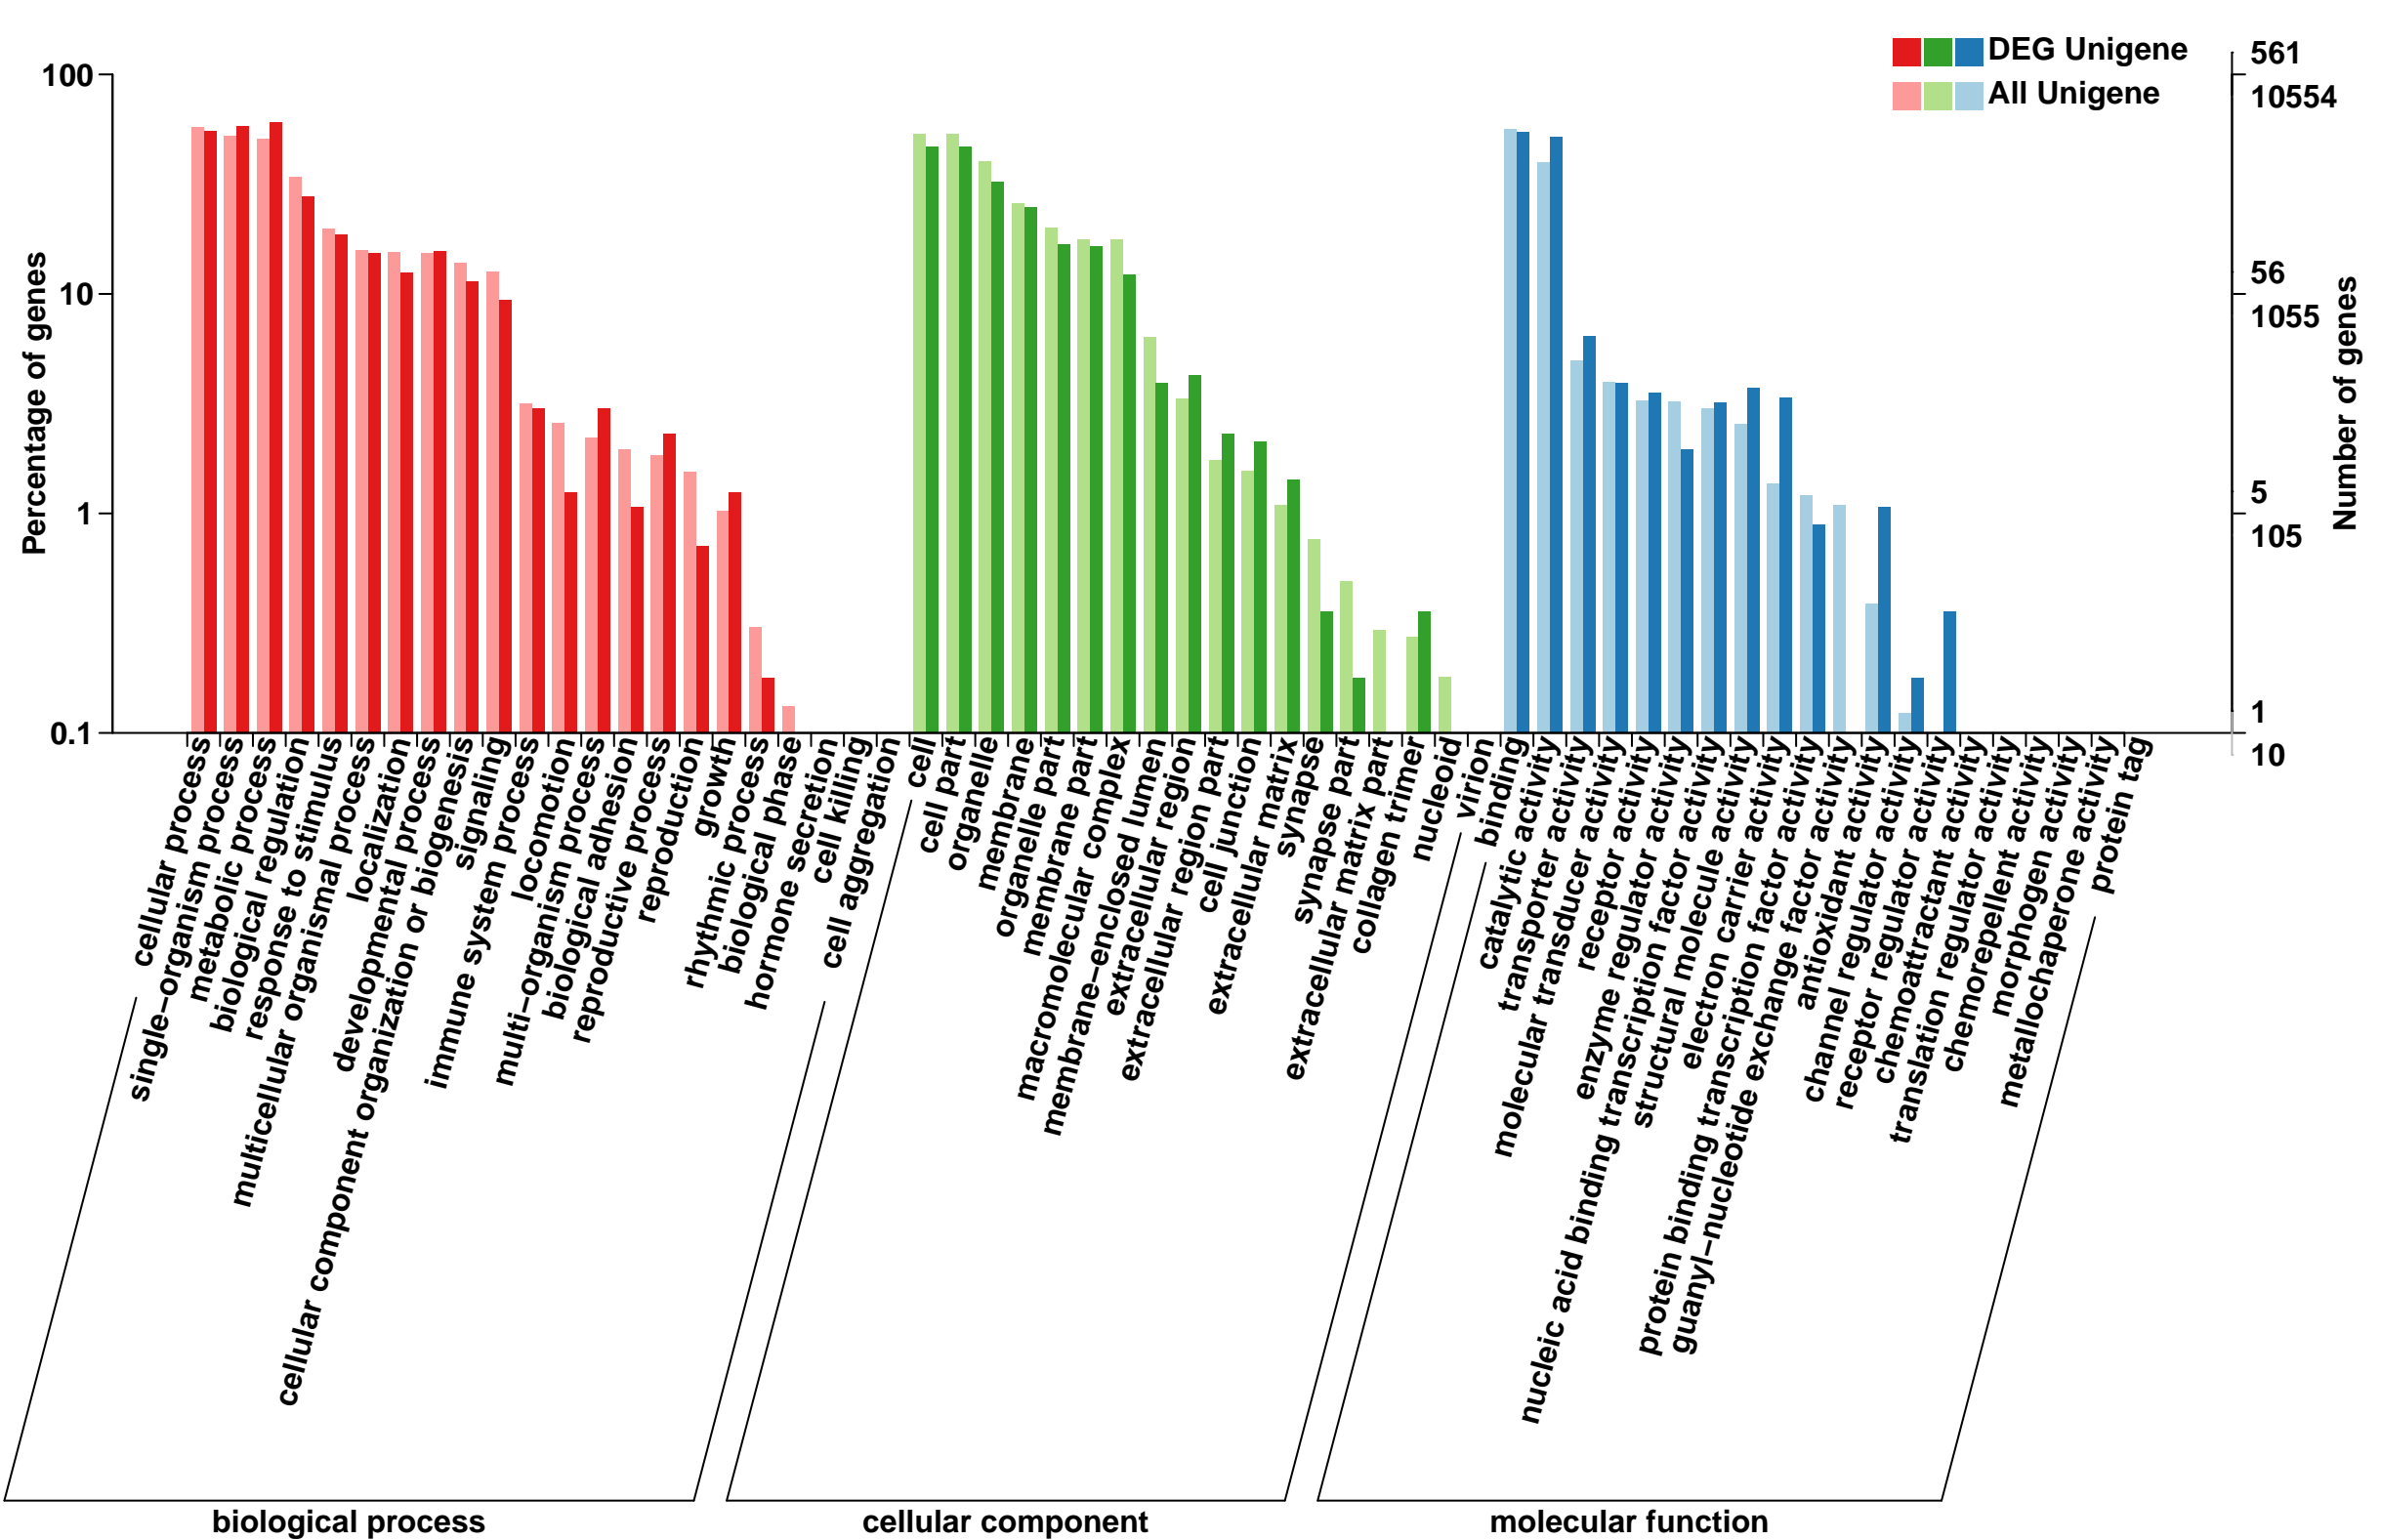

Supplement: s1 [file s1]

# All\_Combination.contigs Length Distribution

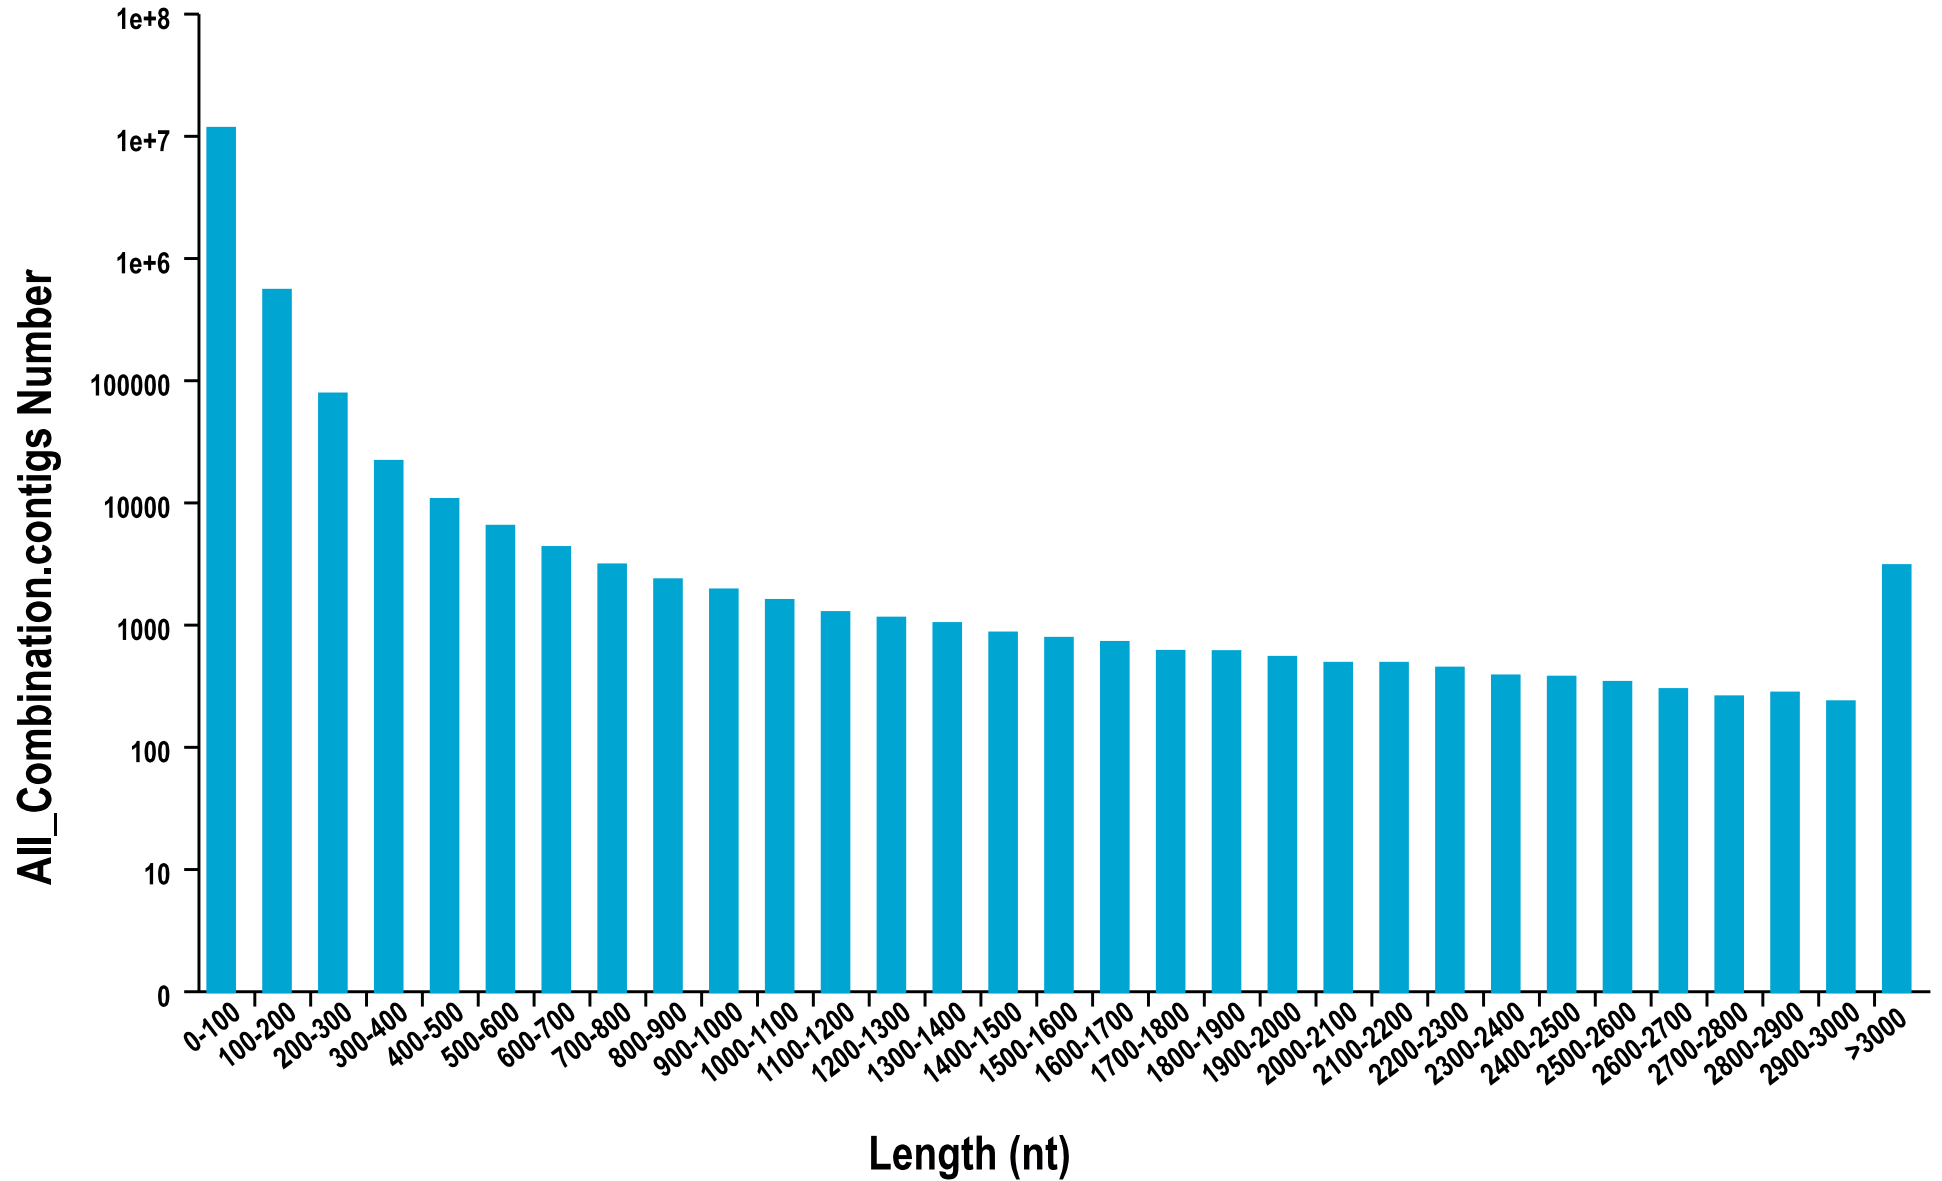

Supplement: s1 [file s1]

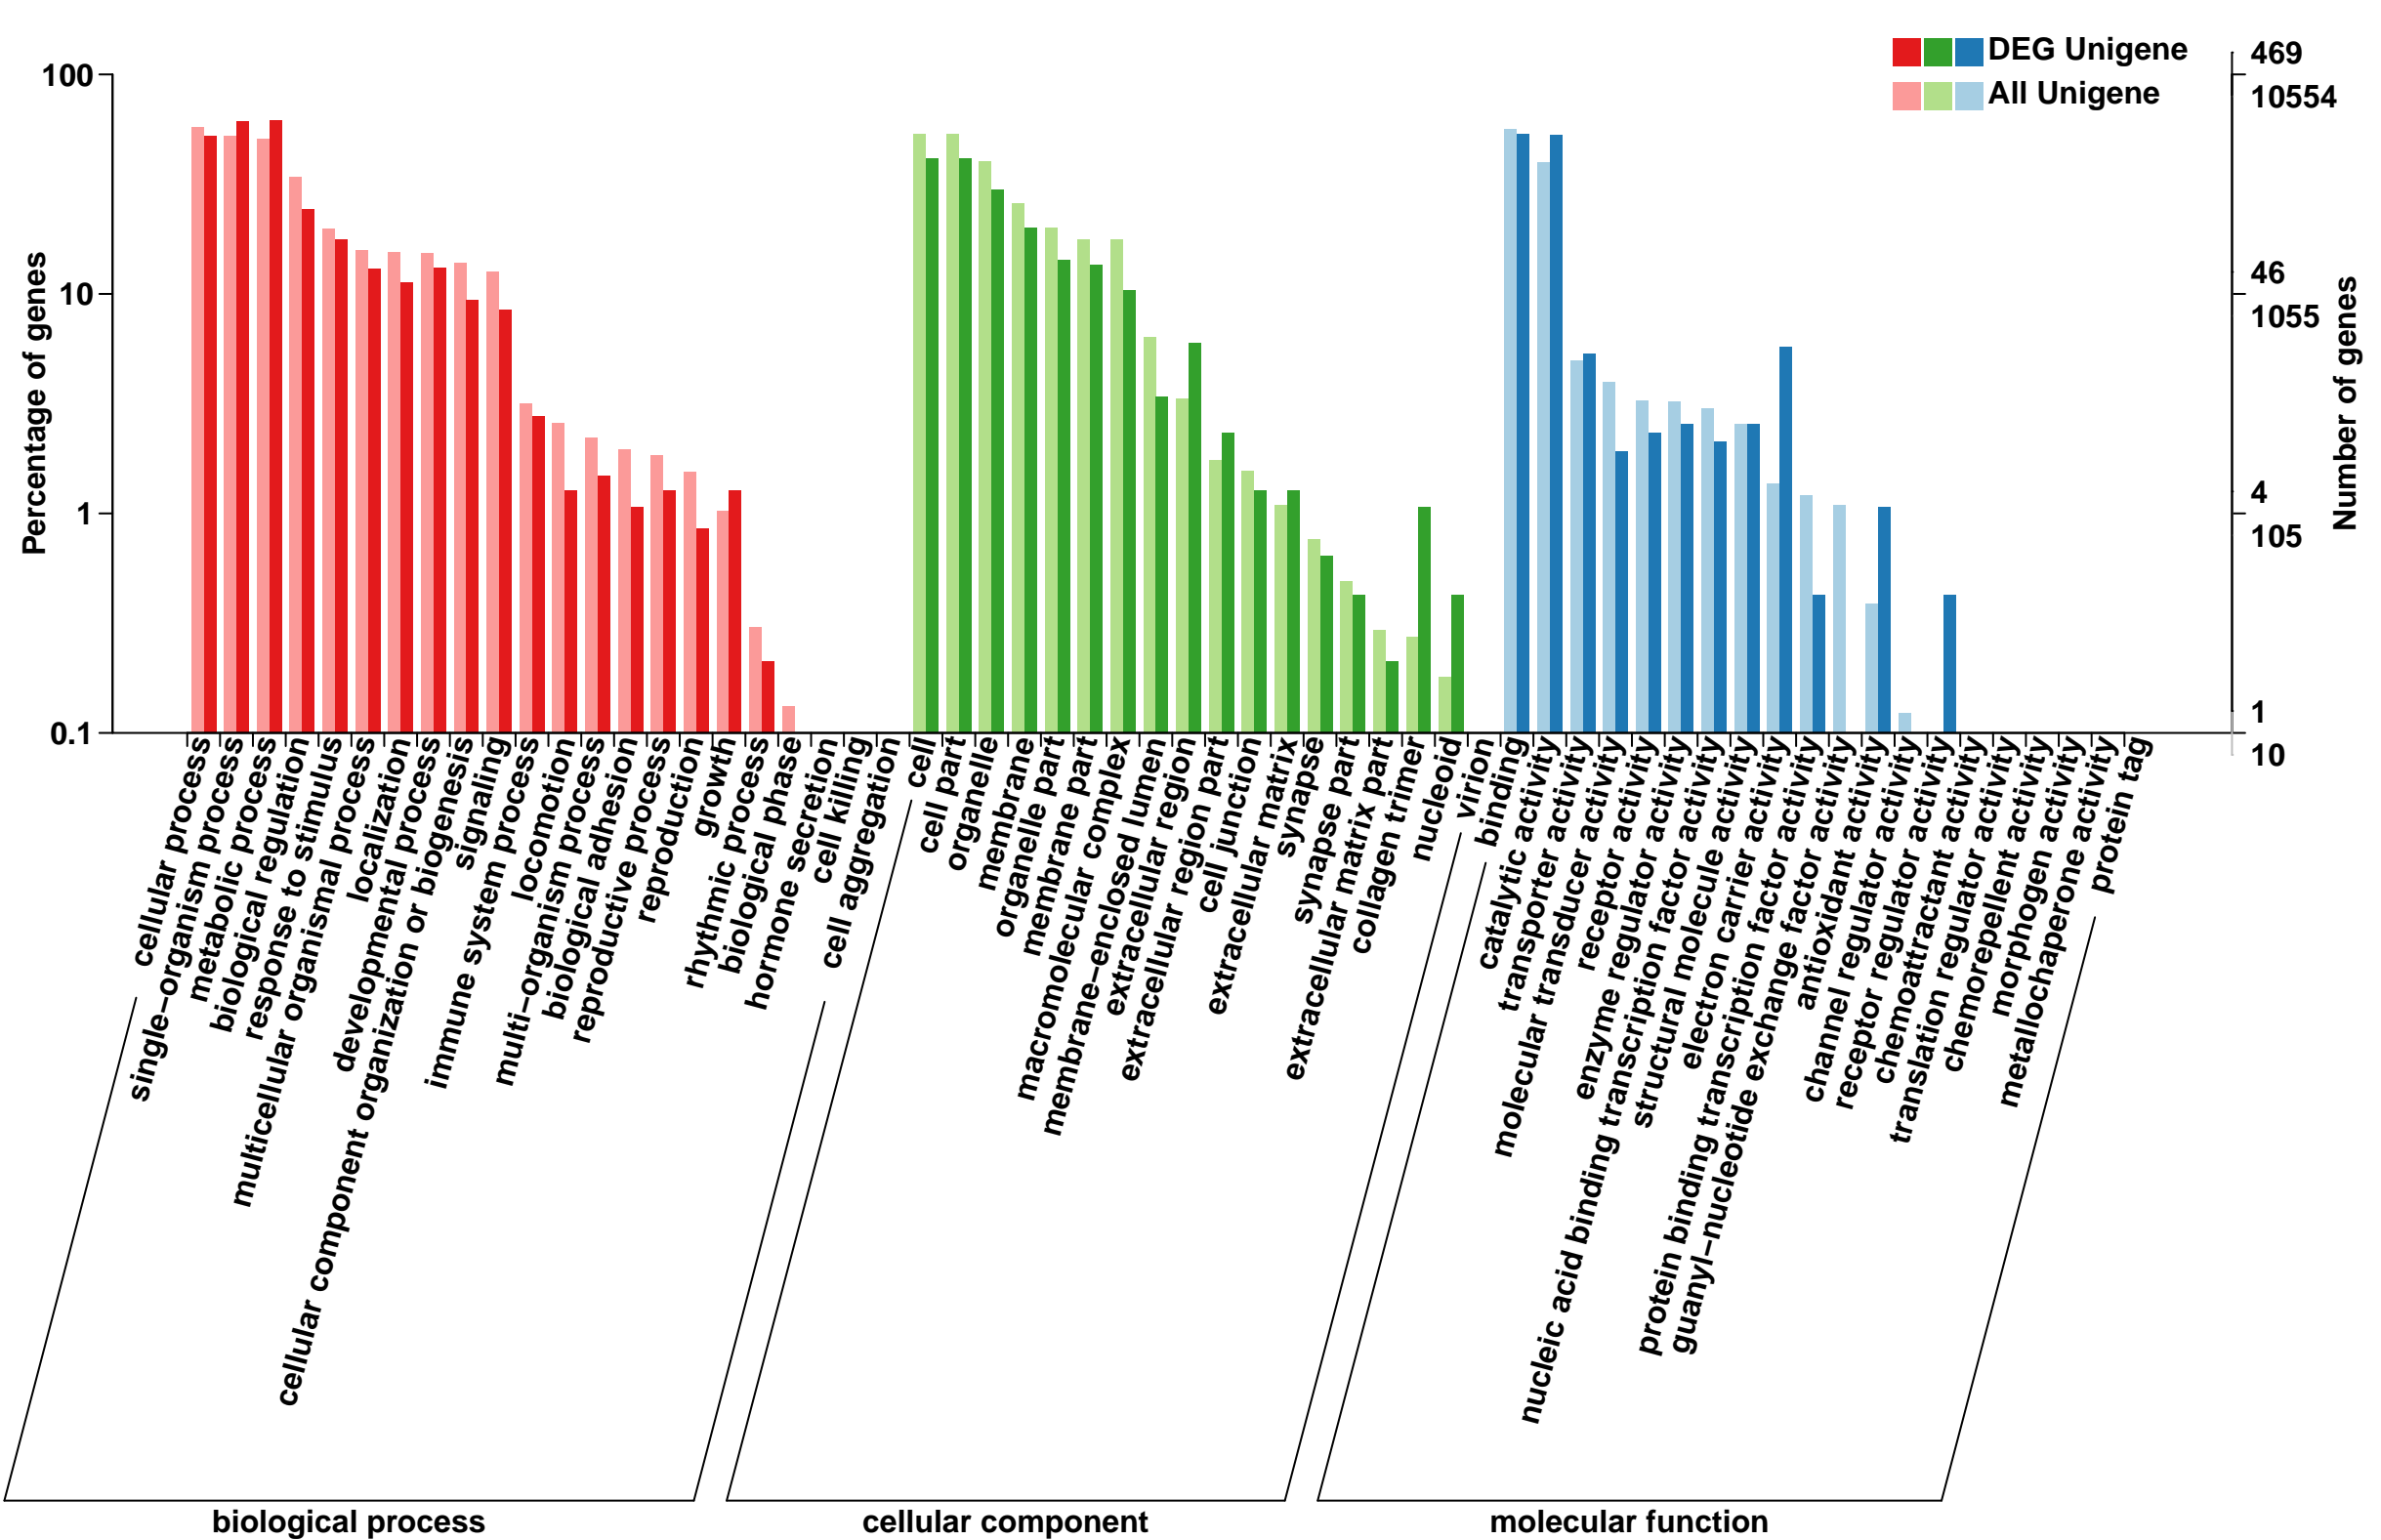

Supplement: s1 [file s1]

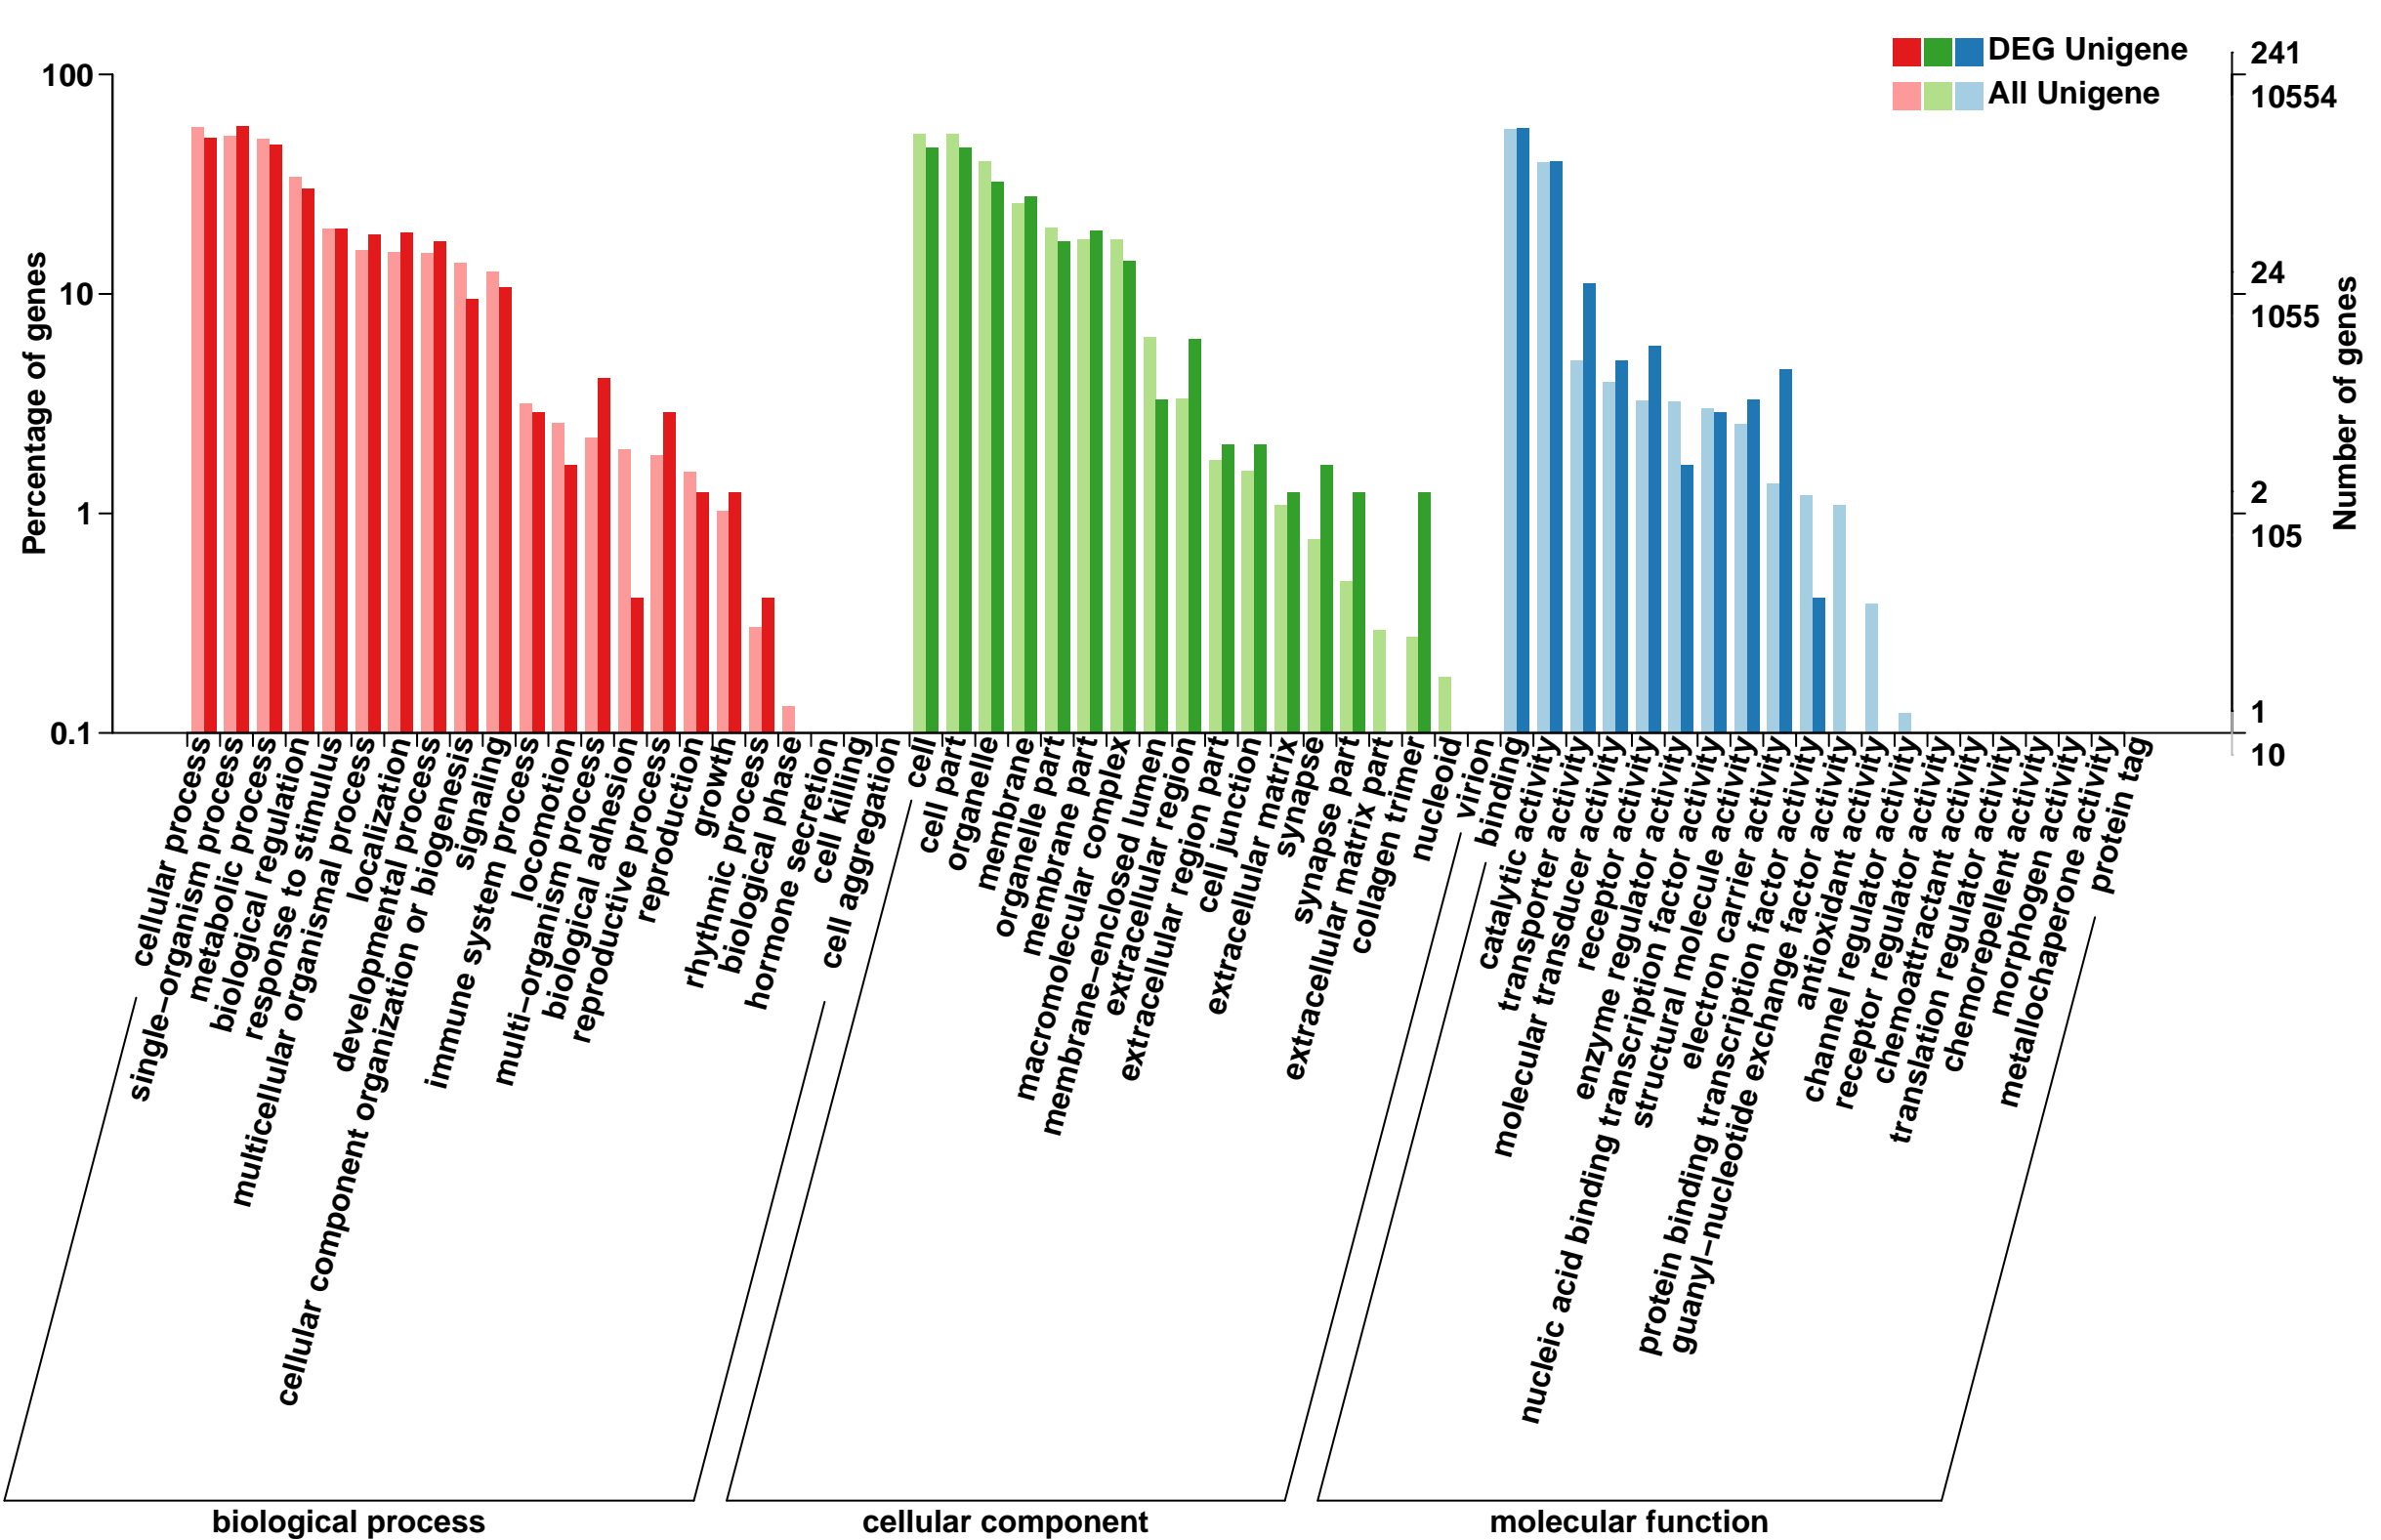

Supplement: s1 [file s1]
